# Supplementary material for: Deep Proteomic Profiling of Human Stem Cell-Derived Microglia: Insights Into Inflammatory and Alcohol-Induced Reactivity
Source: Research Square preprint supplement (doi:10.21203/rs.3.rs-7983368/v1), 2025-11-17
Supplement: Supplementary file 1 [file 44398f2a53abfb62cd486665.xlsx]

## Sheet: iPSC_all_proteins.pg_matrix
Marker	Protein.Group	Protein.Names	Genes	Genes1	First.Protein.Description	N.Sequences	N.Proteotypic.Sequences	C:\timsTOFdata\Tiara_iPSCs_markertest\TW_WT_1_iPSCs_DIAod_60m_5th_4ul_Slot1-10_1_10430.d	C:\timsTOFdata\Tiara_iPSCs_markertest\TW_WT_2_iPSCs_DIAod_60m_5th_4ul_Slot1-12_1_10437.d	C:\timsTOFdata\Tiara_iPSCs_markertest\TW_WT_3_iPSCs_DIAod_60m_5th_5ul_Slot1-14_1_10447.d
	A0A024R1R8;Q9Y2S6	TMA7B_HUMAN;TMA7_HUMAN	TMA7;TMA7B	TMA7	Translation machinery-associated protein 7B	1	0	2.44385e+06	2.94029e+06	4.34021e+06
	A0A024RA87	A0A024RA87_HUMAN	SEPTIN7	SEPTIN7	Septin	1	0			27634.3
	A0A075B6E5	A0A075B6E5_HUMAN	ENAH	ENAH	ENAH actin regulator (Fragment)	1	1	19300.1	12883.3	11631
	A0A087WTJ7	A0A087WTJ7_HUMAN	TPM1	TPM1	Tropomyosin 1	3	3	3.68539e+06	3.75916e+06	5.87117e+06
	A0A087WTW0	A0A087WTW0_HUMAN	UHRF1	UHRF1	E3 ubiquitin-protein ligase UHRF	27	26	268829	279595	266377
	A0A087WUU8	A0A087WUU8_HUMAN	ZNF724	ZNF724	Zinc finger protein 724 (Fragment)	6	5	15446.6	11730.1	11532.3
	A0A087WVF4	A0A087WVF4_HUMAN	CHD1	CHD1	DNA helicase	41	36	79572.8	82173.7	70817.3
	A0A087WWZ6	A0A087WWZ6_HUMAN	PRDM11	PRDM11	PR/SET domain 11	1	1	3788.83
	A0A087WXL6	A0A087WXL6_HUMAN	VPS11	VPS11	Vacuolar protein sorting-associated protein 11 homolog	24	24	42850.4	40619.7	43196.4
	A0A087WYV9;A0A087X1F5	A0A087WYV9_HUMAN;A0A087X1F5_HUMAN	SYNJ2BP-COX16	SYNJ2BP-COX16	Cytochrome c oxidase assembly protein COX16 homolog, mitochondrial	2	0	52774.2	59414.6	48436.1
	A0A087WZ13	A0A087WZ13_HUMAN	RAVER1	RAVER1	Ribonucleoprotein, PTB binding 1	17	17	171415	174768	124479
	A0A087WZE9;A0A994J3W4;A0A9L9PXC9	A0A087WZE9_HUMAN;A0A994J3W4_HUMAN;A0A9L9PXC9_HUMAN	HMGN3	HMGN3	High mobility group nucleosome-binding domain-containing protein 3	2	2	497030	356575	642342
	A0A087WZQ7	A0A087WZQ7_HUMAN	NAPB	NAPB	N-ethylmaleimide-sensitive factor attachment protein, beta, isoform CRA_d	3	3	22996.5	17093.2	16584.8
	A0A087X011;E9PES4	A0A087X011_HUMAN;E9PES4_HUMAN	KIF3A	KIF3A	Kinesin-like protein	14	14	30607	32327.7	37238.7
	A0A087X0T6;A0A087X251	A0A087X0T6_HUMAN;A0A087X251_HUMAN	KIZ	KIZ	Centrosomal protein kizuna (Fragment)	2	2		16788.8	19284.4
	A0A087X1J2	A0A087X1J2_HUMAN	HAPSTR1	HAPSTR1	HUWE1 associated protein modifying stress responses (Fragment)	1	1	22000.6		28489.6
	A0A087X2C4;A0A8V8TM73	A0A087X2C4_HUMAN;A0A8V8TM73_HUMAN	PCDH7	PCDH7	Protocadherin 7	27	27	89125.3	81623.6	79816.3
	A0A096LNH6	A0A096LNH6_HUMAN	DOCK1	DOCK1	Dedicator of cytokinesis 1	50	48	96554.2	101870	100800
	A0A096LP01;A0A096LP01-2	SIM26_HUMAN	SMIM26	SMIM26	Small integral membrane protein 26	2	2	26499.9	24424.4	20591.1
	A0A096LP25	A0A096LP25_HUMAN	AAK1	AAK1	AP2 associated kinase 1	24	22	149893	135435	141959
	A0A096LP69	A0A096LP69_HUMAN	CD99	CD99	CD99 molecule (Xg blood group)	1	1		11020.9	10730.1
	A0A0A0MQS0	A0A0A0MQS0_HUMAN	PHF20L1	PHF20L1	PHD finger protein 20-like protein 1	14	14	45494.7	47869.5	42468.3
	A0A0A0MQW0;A0A0A0MR39	A0A0A0MQW0_HUMAN;A0A0A0MR39_HUMAN	MYEF2	MYEF2	Myelin expression factor 2	13	13	148585	136983	135589
	A0A0A0MRZ1	A0A0A0MRZ1_HUMAN	UNKL	UNKL	Unk like zinc finger	2	2	6373.15	7493.3	6633.82
	A0A0B4J1W3	A0A0B4J1W3_HUMAN	NAA15	NAA15	N-alpha-acetyltransferase 15, NatA auxiliary subunit	1	1	28995	25343.9	22467.7
	A0A0B4J294	A0A0B4J294_HUMAN	TRAPPC2L	TRAPPC2L	Trafficking protein particle complex subunit 2-like protein	5	5	77889.8	82341.2	92748.3
	A0A0C4DFL8;F5GX28	A0A0C4DFL8_HUMAN;F5GX28_HUMAN	KDM4B	KDM4B	[histone H3]-trimethyl-L-lysine(9) demethylase	2	2	10872	15871.7	13780.4
	A0A0C4DFM0;G3V4T6;G3V5T0	A0A0C4DFM0_HUMAN;G3V4T6_HUMAN;G3V5T0_HUMAN	GSTZ1	GSTZ1	maleylacetoacetate isomerase	5	5	76088.5	68781.6	85550.1
	A0A0C4DG89	A0A0C4DG89_HUMAN	DDX46	DDX46	RNA helicase	1	1	13400.3	18588.1	9637.59
	A0A0C4DGB9	A0A0C4DGB9_HUMAN	PPA2	PPA2	Inorganic pyrophosphatase 2	1	1	81807.4	65407.4	55862.9
	A0A0C4DGY3	A0A0C4DGY3_HUMAN	TTC8	TTC8	Tetratricopeptide repeat domain 8	3	3	42345.8	37651.6	50206.3
	A0A0D9SF30	A0A0D9SF30_HUMAN	NCAM1	NCAM1	Neural cell adhesion molecule 1 (Fragment)	4	4	27074.3	24031.8	21059.7
	A0A0D9SFE4	A0A0D9SFE4_HUMAN	DNM1	DNM1	dynamin GTPase	10	9	19574.1	30704	24487.4
	A0A0G2JI36;A0A0G2JIF2;A0A0G2JL56;A0A1W2PQD0;A0A1W2PSE7;Q5SUL5	A0A0G2JI36_HUMAN;A0A0G2JIF2_HUMAN;A0A0G2JL56_HUMAN;A0A1W2PQD0_HUMAN;A0A1W2PSE7_HUMAN;Q5SUL5_HUMAN	HLA-A	HLA-A	Major histocompatibility complex, class I, A	2	2	38447.8	48748.4	45306.8
	A0A0G2JJL1;A0A140T9L0	A0A0G2JJL1_HUMAN;A0A140T9L0_HUMAN	WDR46	WDR46	WD repeat domain 46 (Fragment)	1	1	4512.43	3721.07	3067.45
	A0A0G2JPT5	A0A0G2JPT5_HUMAN	RAD17	RAD17	RAD17 checkpoint clamp loader component	16	16	66195.1	69508.4	62778.1
	A0A0J9YXF2	A0A0J9YXF2_HUMAN	PON2	PON2	Paraoxonase	10	10	172927	171481	152951
	A0A0J9YY79	A0A0J9YY79_HUMAN	INPP5F	INPP5F	Inositol polyphosphate-5-phosphatase F (Fragment)	1	1	64246.7		61826.8
	A0A0J9YYI4	A0A0J9YYI4_HUMAN	SERINC5	SERINC5	Serine incorporator 5	2	2	55253.4	50588.5	44419.5
	A0A0U1RQE4;A0A494C1M0	A0A0U1RQE4_HUMAN;A0A494C1M0_HUMAN	SH3D19	SH3D19	SH3 domain containing 19	13	13	21064.5	18721.4	17310.7
	A0A0U1RQK7;A0A8I5KT99;A0A8I5KV92	A0A0U1RQK7_HUMAN;A0A8I5KT99_HUMAN;A0A8I5KV92_HUMAN	EIF4G3	EIF4G3	Eukaryotic translation initiation factor 4 gamma 3	46	45	169680	189815	178929
	A0A0U1RQL9;A0A0U1RQS5;A0A0U1RQV1;B3KNS4	A0A0U1RQL9_HUMAN;A0A0U1RQS5_HUMAN;A0A0U1RQV1_HUMAN;B3KNS4_HUMAN	ERVK3-1	ERVK3-1	Endogenous retrovirus group K3 member 1 (Fragment)	2	2	13487.7	16794.7	21913.1
	A0A0U1RQY7;U3KQB3	A0A0U1RQY7_HUMAN;U3KQB3_HUMAN	CSNK1G1	CSNK1G1	Casein kinase I isoform gamma-1	1	1	12118	8450.76	7967.51
	A0A0U1RRE5	NBDY_HUMAN	NBDY	NBDY	Negative regulator of P-body association	1	1	26044.1	14806.9
	A0A0U1RRI6	CENL3_HUMAN	CENPVL3	CENPVL3	Centromere protein V-like protein 3	5	1	16790.6	18809.7	17220.5
	A0A0U1RRM4	A0A0U1RRM4_HUMAN	PTBP1	PTBP1	Polypyrimidine tract-binding protein 1	19	16	1.96303e+06	2.09833e+06	1.97464e+06
	A0A140T9M0;A0A140T9U0;A0A140T9W2;Q53YP1	A0A140T9M0_HUMAN;A0A140T9U0_HUMAN;A0A140T9W2_HUMAN;Q53YP1_HUMAN	HLA-C	HLA-C	Major histocompatibility complex, class I, C	5	3	46943	39518.8	35463.4
	A0A1B0GTL5	A0A1B0GTL5_HUMAN	RAB11FIP5	RAB11FIP5	RAB11 family interacting protein 5	2	2	5734.73	7133.32
	A0A1B0GTW6	A0A1B0GTW6_HUMAN	EPB41L1	EPB41L1	Erythrocyte membrane protein band 4.1 like 1	6	6	15666.3	17411.7	18924.1
	A0A1B0GUL3	A0A1B0GUL3_HUMAN	GSE1	GSE1	Gse1 coiled-coil protein (Fragment)	3	3	14611	9008.26	9248.52
	A0A1B0GUS7	A0A1B0GUS7_HUMAN	UNC13B	UNC13B	Unc-13 homolog B	10	3	49104.7	49747.9	53005
	A0A1B0GVD3	A0A1B0GVD3_HUMAN	LIN28B	LIN28B	Lin-28 homolog B	12	11	228749	196931	209256
	A0A1B0GVI3	A0A1B0GVI3_HUMAN	KRT10	KRT10	Keratin, type I cytoskeletal 10	5	1	22096.4	22496.2	21566.7
	A0A1B0GVL4	A0A1B0GVL4_HUMAN	FAM193A	FAM193A	Family with sequence similarity 193 member A	13	13	38087	33635.1	33018.5
	A0A1B0GVT7	A0A1B0GVT7_HUMAN	SUPT3H	SUPT3H	SPT3 homolog, SAGA and STAGA complex component	2	2	12629.3	25879.3	14740.7
	A0A1B0GW05	A0A1B0GW05_HUMAN	DPY19L1	DPY19L1	Dpy-19 like C-mannosyltransferase 1	5	5	53869.5	43604.6	46356.9
	A0A1B0GW50	A0A1B0GW50_HUMAN	ZEB2	ZEB2	Zinc finger E-box binding homeobox 2	13	13	45870.8	41335.8	36167.8
	A0A1C7CYX0	A0A1C7CYX0_HUMAN	EXOC3L2	EXOC3L2	Exocyst complex component 3 like 2	9	9	32626.3	34048.4	30605.8
	A0A1C7CYX1	A0A1C7CYX1_HUMAN	MIDEAS	MIDEAS	Mitotic deacetylase associated SANT domain protein	14	14	67283.1	55687.8	66261
	A0A1C7CYX9	A0A1C7CYX9_HUMAN	DPYSL2	DPYSL2	Dihydropyrimidinase-related protein 2	38	33	1.74093e+06	1.84131e+06	1.95784e+06
	A0A1W2PNV4	A0A1W2PNV4_HUMAN			Actin-related protein 2/3 complex subunit 1A	29	27	319467	374924	430106
	A0A1W2PPI5	A0A1W2PPI5_HUMAN	INTS6L	INTS6L	DEAD/H (Asp-Glu-Ala-Asp/His) box polypeptide 26B, isoform CRA_b	5	5	17577.7	12939.3	13364.1
	A0A1W2PPN1	A0A1W2PPN1_HUMAN	MICA	MICA	MHC class I polypeptide-related sequence A	2	2	15060	12790.4	13643.3
	A0A1W2PQ55	A0A1W2PQ55_HUMAN	HADH	HADH	Hydroxyacyl-CoA dehydrogenase (Fragment)	1	1	4871	3421.05	4442.65
	A0A1W2PQ72	MSD7_HUMAN	MSANTD7	MSANTD7	Myb/SANT-like DNA-binding domain-containing protein 7	2	2	3390.98	5405.12	4464.5
	A0A1W2PQS6	A0A1W2PQS6_HUMAN	RPS10-NUDT3	RPS10-NUDT3	Small ribosomal subunit protein eS10	10	0	2.24507e+06	2.14882e+06	2.34536e+06
	A0A1W2PQU7	A0A1W2PQU7_HUMAN	GFAP	GFAP	Glial fibrillary acidic protein (Fragment)	1	1	58497	30828.9	23651.8
	A0A1W2PRB8	A0A1W2PRB8_HUMAN			Cofactor required for Sp1 transcriptional activation subunit 6	18	18	59481.3	59972.3	62724.6
	A0A1X7SBW1	A0A1X7SBW1_HUMAN	KCTD7	KCTD7	BTB/POZ domain-containing protein KCTD7	1	1	2106.75	1973.95	3484.69
	A0A2C9F2R7	A0A2C9F2R7_HUMAN	FRYL	FRYL	FRY like transcription coactivator	35	34	48600.6	43857.8	55060.2
	A0A2R8Y4L2	RA1L3_HUMAN	HNRNPA1L3	HNRNPA1L3	Heterogeneous nuclear ribonucleoprotein A1-like 3	16	0	3.51338e+06	4.00181e+06	3.42995e+06
	A0A2R8Y4Z8	A0A2R8Y4Z8_HUMAN	CCDC9	CCDC9	Coiled-coil domain containing 9	17	17	314227	237688	312087
	A0A2R8Y6D0	A0A2R8Y6D0_HUMAN	EPB41	EPB41	Protein 4.1	1	1	23294.1	22791.1	21422.5
	A0A2R8YE86	A0A2R8YE86_HUMAN	MORN2	MORN2	MORN repeat containing 2	2	2	8444.09	8955.48	9990.58
	A0A2R8YG42;A0A8V8TQ72	A0A2R8YG42_HUMAN;A0A8V8TQ72_HUMAN	ARHGEF7	ARHGEF7	Rho guanine nucleotide exchange factor 7	26	22	103756	106234	114168
	A0A2Z4LIS9	FXO3B_HUMAN	FOXO3B	FOXO3B	Forkhead box protein O3B	1	1	65329.7	51653.1	83083.4
	A0A384DVK4	A0A384DVK4_HUMAN	R3HCC1L	R3HCC1L	R3H domain and coiled-coil containing 1 like	6	6	20481.4	19947.2	22166.1
	A0A3B3IRR3;A0A7P0Z485	A0A3B3IRR3_HUMAN;A0A7P0Z485_HUMAN	FBRSL1	FBRSL1	Fibrosin like 1	3	3	17170.1	15671.4	14854.3
	A0A3B3IRW6	A0A3B3IRW6_HUMAN	QSER1	QSER1	Glutamine and serine rich 1	27	27	64627.7	62204.2	55845.6
	A0A3B3ISF0	A0A3B3ISF0_HUMAN	LARP1B	LARP1B	La ribonucleoprotein 1B	6	6	10951.7	9143.81	10477.4
	A0A3B3ISH1	A0A3B3ISH1_HUMAN	SNU13	SNU13	Small nuclear ribonucleoprotein 13 (Fragment)	1	1	7895.71	7782.5	4777.22
	A0A3B3ISJ8	A0A3B3ISJ8_HUMAN	CLIP1	CLIP1	CAP-Gly domain containing linker protein 1 (Fragment)	13	13	31985	32159	29051.7
	A0A3B3ISV4	A0A3B3ISV4_HUMAN	VKORC1L1	VKORC1L1	vitamin-K-epoxide reductase (warfarin-sensitive)	5	5	58066.2	50643.6	42954.6
	A0A3B3ITJ4	A0A3B3ITJ4_HUMAN	HNRNPL	HNRNPL	Heterogeneous nuclear ribonucleoprotein L	19	19	2.40735e+06	2.61581e+06	2.60164e+06
	A0A3B3ITT1	A0A3B3ITT1_HUMAN	RAB12	RAB12	RAB12, member RAS oncogene family	9	9	21861.9	23292.9	24761.1
	A0A494BZW2;A0A494C1L5	A0A494BZW2_HUMAN;A0A494C1L5_HUMAN	LRBA	LRBA	LPS responsive beige-like anchor protein	41	35	75993.6	66825.4	67280.8
	A0A494BZX7;A0A499FIJ6;B0QY83	A0A494BZX7_HUMAN;A0A499FIJ6_HUMAN;B0QY83_HUMAN	MRTFA	MRTFA	Myocardin related transcription factor A	7	7	89808.7	82107.6	78959.8
	A0A494C002	A0A494C002_HUMAN	PARN	PARN	Poly(A)-specific ribonuclease PARN	1	0	18714.5		12525.3
	A0A494C0R8	A0A494C0R8_HUMAN	CLUH	CLUH	Clustered mitochondria protein homolog	33	32	136764	135738	130735
	A0A494C100	A0A494C100_HUMAN			DNA helicase MCM8	6	6	352637	271447	280541
	A0A494C1R9;A6NKD2;P0CV98;P0CV99;P0CW00;P0CW01;Q01534	TSPY1_HUMAN;TSPY2_HUMAN;TSPY3_HUMAN;TSPY4_HUMAN;TSPY8_HUMAN;TSPY9_HUMAN;TSPYA_HUMAN	TSPY1;TSPY10;TSPY2;TSPY3;TSPY4;TSPY8;TSPY9	TSPY1	Testis-specific Y-encoded protein 9	1	0	54711.3	68066.7	61061
	A0A499FI31	A0A499FI31_HUMAN	SART3	SART3	Spliceosome associated factor 3, U4/U6 recycling protein	33	33	241843	251559	279381
	A0A499FI48;C9JMN9	A0A499FI48_HUMAN;C9JMN9_HUMAN	PDIA4	PDIA4	Protein disulfide-isomerase	1	1		4287.67	4790.87
	A0A499FIZ0	A0A499FIZ0_HUMAN	WDR26	WDR26	WD repeat-containing protein 26	19	19	137164	128795	130227
	A0A499FJE1	A0A499FJE1_HUMAN	BOLA2B	BOLA2B	BolA family member 2B	2	0	304619	275020	300311
	A0A499FJI4;A0A804HL12	A0A499FJI4_HUMAN;A0A804HL12_HUMAN	MYCBP2	MYCBP2	RCR-type E3 ubiquitin transferase	34	34	84783.3	89173.1	84265.4
	A0A590UJ96	A0A590UJ96_HUMAN	LOC122526780	LOC122526780	Uncharacterized protein	2	2	6588.42	5382.32
	A0A590UJA9	A0A590UJA9_HUMAN	TMUB1	TMUB1	Transmembrane and ubiquitin like domain containing 1	3	3	81532.4	85780.7	83184.3
	A0A590UJI2	A0A590UJI2_HUMAN	CALM2	CALM2	Calmodulin 2 (Fragment)	6	1	5.07964e+06	4.52666e+06	7.06667e+06
	A0A590UJW6	A0A590UJW6_HUMAN	ZCCHC14	ZCCHC14	Zinc finger CCHC-type containing 14	3	2	10944.3	11073.2	13837.7
	A0A5E8	A0A5E8_HUMAN	GAS2L1	GAS2L1	Growth arrest specific 2 like 1	2	2	7266.56	5522.72
	A0A5F9UY30	A0A5F9UY30_HUMAN	TGOLN2	TGOLN2	Trans-golgi network protein 2	13	13	183038	111684	167711
	A0A5F9YFS9	A0A5F9YFS9_HUMAN	SPCS1	SPCS1	Signal peptidase complex subunit 1	2	2	526340	527345	512672
	A0A669KBC2	A0A669KBC2_HUMAN	CDKL5	CDKL5	Cyclin dependent kinase like 5	3	3	8249.35	6470.91	5956.55
	A0A6I8PLG0	A0A6I8PLG0_HUMAN	ADGRL2	ADGRL2	Adhesion G protein-coupled receptor L2	1	1	6013.84	7104.11
	A0A6Q8PF05;B4DHE8	A0A6Q8PF05_HUMAN;B4DHE8_HUMAN	MSI2	MSI2	Musashi RNA binding protein 2 (Fragment)	6	6	145123	125070	152672
	A0A6Q8PF18	A0A6Q8PF18_HUMAN			Tripartite motif-containing protein 2	25	23	180309	171645	176348
	A0A6Q8PF61;A0A6Q8PF96;A0A7I2V4L2;A0A7I2V5W3;A0A7I2V3F0;A0A7I2V5G7	A0A6Q8PF61_HUMAN;A0A6Q8PF96_HUMAN;A0A7I2V3F0_HUMAN;A0A7I2V4L2_HUMAN;A0A7I2V5G7_HUMAN;A0A7I2V5W3_HUMAN	CSPP1	CSPP1	Centrosome and spindle pole associated protein 1	10	10	23554	19461.8	27157.5
	A0A6Q8PFM9;A0A6Q8PGL8;A0A6Q8PGR8	A0A6Q8PFM9_HUMAN;A0A6Q8PGL8_HUMAN;A0A6Q8PGR8_HUMAN	LCOR	LCOR	Ligand dependent nuclear receptor corepressor	3	3	3405.91	5130.03	2948.33
	A0A6Q8PFP0	A0A6Q8PFP0_HUMAN			Uncharacterized protein	3	2	9748.27	11234.9	16076.2
	A0A6Q8PGE4	A0A6Q8PGE4_HUMAN	KIF1A	KIF1A	Kinesin family member 1A	16	16	30196.1	27405.5	27238.9
	A0A7I2PJA1	A0A7I2PJA1_HUMAN	GLI2	GLI2	GLI family zinc finger 2	11	10	37040.7	37289.4	37253.5
	A0A7I2V334	A0A7I2V334_HUMAN	HNRNPA1	HNRNPA1	Heterogeneous nuclear ribonucleoprotein A1 (Fragment)	1	0	7.46819e+06	7.04163e+06	7.39885e+06
	A0A7I2V3R0	A0A7I2V3R0_HUMAN	MACROH2A2	MACROH2A2	Histone H2A (Fragment)	1	1		12058.2	15296.6
	A0A7I2V4I5	A0A7I2V4I5_HUMAN	ZC3H13	ZC3H13	Zinc finger CCCH-type containing 13	24	24	188278	177908	166607
	A0A7I2V5D2	A0A7I2V5D2_HUMAN	MKRN2	MKRN2	E3 ubiquitin-protein ligase makorin-2	9	9	131772	125811	105332
	A0A7I2V5F1	A0A7I2V5F1_HUMAN	DNMT1	DNMT1	DNA (cytosine-5)-methyltransferase	2	2	80577.8	56259.7	51216.7
	A0A7I2V5U5;G5E9E7	A0A7I2V5U5_HUMAN;G5E9E7_HUMAN	TJP1	TJP1	Tight junction protein 1	60	60	230888	219070	221196
	A0A7I2V647	A0A7I2V647_HUMAN	G3BP2	G3BP2	G3BP stress granule assembly factor 2	1	1	13992.2	9685.98	7696.35
	A0A7I2YQ75	A0A7I2YQ75_HUMAN	USP40	USP40	Ubiquitin specific peptidase 40	12	12	11687.4	10765.9	10910.1
	A0A7I2YQ88	A0A7I2YQ88_HUMAN	PABPC1	PABPC1	Polyadenylate-binding protein	18	5	1.46477e+06	1.60312e+06	1.86356e+06
	A0A7N4I394	A0A7N4I394_HUMAN	PRPF40A	PRPF40A	Pre-mRNA processing factor 40 homolog A	25	23	435353	437120	450972
	A0A7P0T9I3;A0A994J506;A0A994J509	A0A7P0T9I3_HUMAN;A0A994J506_HUMAN;A0A994J509_HUMAN	MBNL2	MBNL2	Muscleblind like splicing regulator 2	7	2	46476.7	47285.3	40753.8
	A0A7P0TA35	A0A7P0TA35_HUMAN	P4HB	P4HB	Protein disulfide-isomerase	34	34	2.03643e+06	2.38407e+06	2.69679e+06
	A0A7P0TA70	A0A7P0TA70_HUMAN	AAR2	AAR2	Protein AAR2 homolog	10	10	91334.7	97079.1	97191.9
	A0A7P0TAG7	A0A7P0TAG7_HUMAN	SLC1A3	SLC1A3	Amino acid transporter	4	3	19551.6	18914.4	14194.2
	A0A7P0TAN4	A0A7P0TAN4_HUMAN	LOC122539214	LOC122539214	Uncharacterized protein	3	2	12796.2	11623.6	9015.96
	A0A7P0TAY0	A0A7P0TAY0_HUMAN	VCP	VCP	Valosin containing protein (Fragment)	1	1	9855.56	5673.01	7457.6
	A0A7P0TBH4	A0A7P0TBH4_HUMAN	OPHN1	OPHN1	Oligophrenin 1	2	2	4446.86		4460.74
	A0A804CD06	A0A804CD06_HUMAN	PTPA	PTPA	Serine/threonine-protein phosphatase 2A activator	9	9	168223	173782	191662
	A0A804F6T5;A0A804F729	A0A804F6T5_HUMAN;A0A804F729_HUMAN	PKM	PKM	Pyruvate kinase	3	3	246582	240472	276773
	A0A804HIE8	A0A804HIE8_HUMAN	DOCK9	DOCK9	Dedicator of cytokinesis 9	30	29	71077	75434.8	70751.7
	A0A804HIF1	A0A804HIF1_HUMAN	FGFR1	FGFR1	Fibroblast growth factor receptor	11	8	59141	66999.1	55411.7
	A0A804HIT1;A0A804HIX1	A0A804HIT1_HUMAN;A0A804HIX1_HUMAN	ATXN7L2	ATXN7L2	Ataxin 7 like 2	4	4	25798	18867.6	18453.9
	A0A804HIV1	A0A804HIV1_HUMAN	BCL9	BCL9	BCL9 transcription coactivator	1	1		7469.44	8117.82
	A0A804HJG7	A0A804HJG7_HUMAN	CLASP2	CLASP2	Cytoplasmic linker associated protein 2	33	33	99017.5	102742	95280.9
	A0A804HJX8;J3KPF0	A0A804HJX8_HUMAN;J3KPF0_HUMAN	HECTD4	HECTD4	HECT domain E3 ubiquitin protein ligase 4	12	12	58934.9	52785.3	57989.4
	A0A804HJZ5	A0A804HJZ5_HUMAN	TBL1X	TBL1X	Transducin beta like 1 X-linked	6	6	38032.2	33704.1	36113.4
	A0A804HKC3	A0A804HKC3_HUMAN	PRRC2B	PRRC2B	Proline rich coiled-coil 2B (Fragment)	1	1	49015	44105.5	60133.3
	A0A804HKD7	A0A804HKD7_HUMAN	RABGAP1L	RABGAP1L	RAB GTPase activating protein 1 like	14	14	39550.9	48019.8	50404.8
	A0A804HKE7	A0A804HKE7_HUMAN	MAP4	MAP4	Microtubule-associated protein	52	52	858538	823798	981505
	A0A805TBS0	A0A805TBS0_HUMAN	ARHGAP21	ARHGAP21	Rho GTPase activating protein 21	25	25	81573.9	61088.9	57053.9
	A0A8C8KGQ8	A0A8C8KGQ8_HUMAN	UBAP2	UBAP2	Ubiquitin associated protein 2	22	22	317990	285289	309025
	A0A8C8MQ70	A0A8C8MQ70_HUMAN	UBAP2	UBAP2	Ubiquitin associated protein 2	1	1	116818	130340	157605
	A0A8C8NWT4	A0A8C8NWT4_HUMAN	PLEKHG3	PLEKHG3	Pleckstrin homology and RhoGEF domain containing G3	23	23	71091.3	73896.5	65960.1
	A0A8I5KSE4	A0A8I5KSE4_HUMAN	NAV1	NAV1	Neuron navigator 1	38	38	47300.7	43866.4	43048.2
	A0A8I5KWQ7	A0A8I5KWQ7_HUMAN			FERM domain-containing protein	24	24	462455	436755	432428
	A0A8I5KX72;A0AAG2UWQ9	A0A8I5KX72_HUMAN;A0AAG2UWQ9_HUMAN	NKRF	NKRF	NFKB repressing factor	24	24	67724.8	73368.4	69965.6
	A0A8I5KX85	A0A8I5KX85_HUMAN	CDV3	CDV3	CDV3 homolog	1	1	5919.35	9688.74	13126.9
	A0A8I5KZ24	A0A8I5KZ24_HUMAN	ATE1	ATE1	Arginyl-tRNA--protein transferase 1	10	10	35062.2	29163.7	30952.8
	A0A8Q3SHM7	A0A8Q3SHM7_HUMAN	MIPOL1	MIPOL1	Mirror-image polydactyly 1	1	1	4039.83	4475.05
	A0A8Q3SIN7	A0A8Q3SIN7_HUMAN	VANGL2	VANGL2	Vang-like protein	12	12	37824.9	46587.2	39585.9
	A0A8Q3SIW8;A0A8Q3WLE3;H7C4J7	A0A8Q3SIW8_HUMAN;A0A8Q3WLE3_HUMAN;H7C4J7_HUMAN	ROBO2	ROBO2	Roundabout guidance receptor 2	7	7	25073.1	18044.4	16071.3
	A0A8Q3WKY3;A0A8Q3WKY6	A0A8Q3WKY3_HUMAN;A0A8Q3WKY6_HUMAN	PROSER3	PROSER3	Proline and serine rich 3	3	3	10720.1	10740.3	9838.71
	A0A8V8TKT5	A0A8V8TKT5_HUMAN	STK39	STK39	non-specific serine/threonine protein kinase	9	9	108361	107958	115118
	A0A8V8TMN3	A0A8V8TMN3_HUMAN	CCDC8	CCDC8	Coiled-coil domain containing 8	7	7	239967	228014	157849
	A0A8V8TMN4	A0A8V8TMN4_HUMAN	PPIP5K2	PPIP5K2	Inositol hexakisphosphate and diphosphoinositol-pentakisphosphate kinase	31	25	81665.2	85510.4	93318.8
	A0A8V8TMP7	A0A8V8TMP7_HUMAN	CYRIB	CYRIB	CYFIP related Rac1 interactor B	16	14	170313	170704	184730
	A0A8V8TMQ1	A0A8V8TMQ1_HUMAN	FXR1	FXR1	RNA-binding protein FXR1	26	23	677573	714736	697538
	A0A8V8TNX9	A0A8V8TNX9_HUMAN	PKM	PKM	Pyruvate kinase	39	37	3.65745e+06	3.97865e+06	4.38659e+06
	A0A8V8TNY3	A0A8V8TNY3_HUMAN	FAM120A	FAM120A	Family with sequence similarity 120 member A	1	1	4193.39	3252.09
	A0A8V8TQ80	A0A8V8TQ80_HUMAN	OSTM1	OSTM1	Osteoclastogenesis associated transmembrane protein 1	1	1	16807.6	23706.6	25282.6
	A0A8V8TR67	A0A8V8TR67_HUMAN	CLEC16A	CLEC16A	C-type lectin domain containing 16A	7	7	27117.4	29844.2	35032.5
	A0A994J3S8	A0A994J3S8_HUMAN	GLS	GLS	Glutaminase (Fragment)	1	1	41637.7	29498.6	23816
	A0A994J3W0;C9JZI7	A0A994J3W0_HUMAN;C9JZI7_HUMAN	NAP1L4	NAP1L4	Nucleosome assembly protein 1 like 4	1	1	4816.8	3274.6	5038.23
	A0A994J3X0	A0A994J3X0_HUMAN	TTC17	TTC17	Tetratricopeptide repeat domain 17	14	14	34676.1	36552.1	29762.7
	A0A994J434	A0A994J434_HUMAN	HMGA1	HMGA1	High mobility group protein HMG-I/HMG-Y	1	1	27324.8	24018.1	33654.1
	A0A994J4G5	A0A994J4G5_HUMAN	SPTAN1	SPTAN1	Spectrin alpha, non-erythrocytic 1 (Fragment)	2	2	213176	196077	177368
	A0A994J4R6;A0A994J6S4	A0A994J4R6_HUMAN;A0A994J6S4_HUMAN	USP9X	USP9X	ubiquitinyl hydrolase 1	1	1	26886.3	22168.4	23712.9
	A0A994J4Y3;A0A994J7H1;A0A994J7V4	A0A994J4Y3_HUMAN;A0A994J7H1_HUMAN;A0A994J7V4_HUMAN	SRRM1	SRRM1	Serine and arginine repetitive matrix 1	1	1	55064.2	42283.2	51456.6
	A0A994J4Y8	A0A994J4Y8_HUMAN	PGAM5	PGAM5	Serine/threonine-protein phosphatase PGAM5, mitochondrial	1	1	7057.14	16455.3	11923.1
	A0A994J508	A0A994J508_HUMAN	VASP	VASP	Vasodilator stimulated phosphoprotein (Fragment)	1	1	22360.1	20831.1	22402.4
	A0A994J537	A0A994J537_HUMAN	TNS3	TNS3	Tensin 3	27	26	131174	133381	134169
	A0A994J5B1	A0A994J5B1_HUMAN	EPB41L2	EPB41L2	Erythrocyte membrane protein band 4.1 like 2	45	41	425935	448909	463867
	A0A994J5E5	A0A994J5E5_HUMAN	CYTH2	CYTH2	Cytohesin-2	6	4	80327.5	69096	74472.8
	A0A994J5G1	A0A994J5G1_HUMAN	TUBA3FP	TUBA3FP	Tubulin alpha 3f pseudogene	2	2	16692.4		15427.4
	A0A994J5K1	A0A994J5K1_HUMAN	PMPCA	PMPCA	Peptidase, mitochondrial processing subunit alpha	24	24	166836	177670	169269
	A0A994J749	A0A994J749_HUMAN	IMPDH	IMPDH	Inosine-5'-monophosphate dehydrogenase	29	0	1.20779e+06	1.19621e+06	1.33467e+06
	A0A994J782	A0A994J782_HUMAN	HNRNPK	HNRNPK	Heterogeneous nuclear ribonucleoprotein K (Fragment)	1	1	11284.5	5932.73	12198.9
	A0A994J7A1;E9PPZ9	A0A994J7A1_HUMAN;E9PPZ9_HUMAN	GPAA1	GPAA1	Glycosylphosphatidylinositol anchor attachment 1	6	6	30688.5	32450.1	29851.4
	A0A994J7H4	A0A994J7H4_HUMAN	NPLOC4	NPLOC4	NPL4 homolog, ubiquitin recognition factor	24	24	355374	351279	386254
	A0A994J7P9	A0A994J7P9_HUMAN	FXR2	FXR2	FMR1 autosomal homolog 2	22	20	122316	122119	121487
	A0A994J7X3	A0A994J7X3_HUMAN	VASP	VASP	Vasodilator stimulated phosphoprotein (Fragment)	1	1	20288.4	12371.3	29575.7
	A0A9L9PX62;A8K070	A0A9L9PX62_HUMAN;A8K070_HUMAN	GPS1	GPS1	G protein pathway suppressor 1	1	1	40137.5	47036.6	63393.8
	A0A9L9PXE4	A0A9L9PXE4_HUMAN	SF1	SF1	Splicing factor 1	15	15	952274	880183	1.01014e+06
	A0AA34QVE6	A0AA34QVE6_HUMAN	UBAP2L	UBAP2L	Ubiquitin associated protein 2 like	2	2	10224	9110.28
	A0AA34QW03	A0AA34QW03_HUMAN	SYNCRIP	SYNCRIP	Synaptotagmin binding cytoplasmic RNA interacting protein	27	20	2.18943e+06	2.05294e+06	1.98256e+06
	A0AAG2THM2	A0AAG2THM2_HUMAN	GMPR2	GMPR2	GMP reductase	9	7	78648.8	86050.2	89445.5
	A0AAG2UUQ8;A0AAG2UUZ7	A0AAG2UUQ8_HUMAN;A0AAG2UUZ7_HUMAN	BAHCC1	BAHCC1	BAH domain and coiled-coil containing 1	2	2	6793.32	7968.9	4925.02
	A0AAG2UVM1	A0AAG2UVM1_HUMAN	HAT1	HAT1	Histone acetyltransferase type B catalytic subunit	11	11	176665	204032	202989
	A0AAG2UW97;A0AAG2UWH0;A0AAG2UWR8;A0AAG2UY03	A0AAG2UW97_HUMAN;A0AAG2UWH0_HUMAN;A0AAG2UWR8_HUMAN;A0AAG2UY03_HUMAN	TGOLN2	TGOLN2	Trans-golgi network protein 2	1	1	21912.1		34816.6
	A0AAQ5BH85	A0AAQ5BH85_HUMAN	TPM1	TPM1	Tropomyosin alpha-1 chain	14	5	4.02894e+06	3.54262e+06	4.7529e+06
	A0AAQ5BHU2;A0AAQ5BHV2	A0AAQ5BHU2_HUMAN;A0AAQ5BHV2_HUMAN	SMAD4	SMAD4	Mothers against decapentaplegic homolog	13	13	118543	119128	114984
	A0AAQ5BIJ6	A0AAQ5BIJ6_HUMAN	ZNF852	ZNF852	Zinc finger protein 852	1	1	4453.58	1842.56	3174.05
	A0AVF1	IFT56_HUMAN	IFT56	IFT56	Intraflagellar transport protein 56	6	6	30100.9	24059.1	22669.7
	A0AVI4;A0AVI4-2	TM129_HUMAN	TMEM129	TMEM129	E3 ubiquitin-protein ligase TM129	1	1	8220.92	6107.71	5275.38
	A0AVK6	E2F8_HUMAN	E2F8	E2F8	Transcription factor E2F8	1	1	4167.47
	A0AVT1	UBA6_HUMAN	UBA6	UBA6	Ubiquitin-like modifier-activating enzyme 6	43	43	160723	167341	185078
	A0FGR8-2	ESYT2_HUMAN	ESYT2	ESYT2	Isoform 2 of Extended synaptotagmin-2	1	1	37849.9	35931.4	28545.1
	A0FGR8;A0FGR8-6	ESYT2_HUMAN	ESYT2	ESYT2	Extended synaptotagmin-2	13	13	57791.3	57179	46373.4
	A0JLT2;A0JLT2-2	MED19_HUMAN	MED19	MED19	Mediator of RNA polymerase II transcription subunit 19	1	1	17225.7	20962.7	18846.4
	A0JNW5	BLT3B_HUMAN	BLTP3B	BLTP3B	Bridge-like lipid transfer protein family member 3B	15	14	30077.6	28197.8	25921.6
	A0MZ66	SHOT1_HUMAN	SHTN1	SHTN1	Shootin-1	18	18	40975.1	39186.2	38376.3
	A0PJW6	TM223_HUMAN	TMEM223	TMEM223	Transmembrane protein 223	2	2	27554	26401.7	20663.8
	A1A4S6	RHG10_HUMAN	ARHGAP10	ARHGAP10	Rho GTPase-activating protein 10	11	10	39740.6	38120	40688.2
	A1L020	MEX3A_HUMAN	MEX3A	MEX3A	RNA-binding protein MEX3A	10	10	87280.1	79978	73971.2
	A1L0T0	HACL2_HUMAN	ILVBL	ILVBL	2-hydroxyacyl-CoA lyase 2	16	16	158943	158519	133279
	A1L170;A1L170-2	CA226_HUMAN	C1orf226	C1orf226	Uncharacterized protein C1orf226	3	3	53603.1	44881.7	40422.6
	A1X283	SPD2B_HUMAN	SH3PXD2B	SH3PXD2B	SH3 and PX domain-containing protein 2B	25	23	152794	165849	196283
	A1XBS5;A1XBS5-2;A1XBS5-3	CBAR1_HUMAN	CIBAR1	CIBAR1	CBY1-interacting BAR domain-containing protein 1	4	4	26605.6	29040.9	20949.4
	A2RRD8	ZN320_HUMAN	ZNF320	ZNF320	Zinc finger protein 320	2	2	6672.45	7278.55	7375.96
	A2RRP1	NBAS_HUMAN	NBAS	NBAS	NBAS subunit of NRZ tethering complex	42	42	332340	320241	277561
	A2RTX5	SYTC2_HUMAN	TARS3	TARS3	Threonine--tRNA ligase 2, cytoplasmic	7	7	23909.6	31116	28143.9
	A2RU48	SMCO3_HUMAN	SMCO3	SMCO3	Single-pass membrane and coiled-coil domain-containing protein 3	2	2	13731.3	15315.3	11744.3
	A2RU67	F234B_HUMAN	FAM234B	FAM234B	Protein FAM234B	2	2	14474.4	15941	22490.5
	A2RUC4	TYW5_HUMAN	TYW5	TYW5	tRNA wybutosine-synthesizing protein 5	5	5	12879.4	12139.2	13580.8
	A2VDF0;A2VDF0-2	FUCM_HUMAN	FUOM	FUOM	Fucose mutarotase	2	2	5251.18	9088.39	7000.28
	A2VDJ0;A2VDJ0-5;A2VDJ0-3	T131L_HUMAN	TMEM131L	TMEM131L	Transmembrane protein 131-like	12	12	19904.4	16200.4	15431.8
	A3KMH1	VWA8_HUMAN	VWA8	VWA8	von Willebrand factor A domain-containing protein 8	33	33	64464.8	53885.8	53562.9
	A3KN83;A3KN83-2	SBNO1_HUMAN	SBNO1	SBNO1	Protein strawberry notch homolog 1	28	22	62303.6	59142.5	64825.3
	A4D126;A4D126-2	ISPD_HUMAN	CRPPA	CRPPA	D-ribitol-5-phosphate cytidylyltransferase	1	1	7530.32	8518.18
	A4D161-2	F221A_HUMAN	FAM221A	FAM221A	Isoform 2 of Protein FAM221A	4	4	28638.5	22846.6	27572.9
	A4D1E9	GTPBA_HUMAN	GTPBP10	GTPBP10	GTP-binding protein 10	11	11	35337.3	36234.6	28147.9
	A4D1P6	WDR91_HUMAN	WDR91	WDR91	WD repeat-containing protein 91	12	12	28716.1	23125.5	24468.8
	A4D1U4	DEN11_HUMAN	DENND11	DENND11	DENN domain-containing protein 11	2	2	15307.9	17052.7	15876.8
	A4D2B0	MBLC1_HUMAN	MBLAC1	MBLAC1	Metallo-beta-lactamase domain-containing protein 1	6	6	22176.1	21792.8	18492.1
	A4FU69;A4FU69-3	EFCB5_HUMAN	EFCAB5	EFCAB5	EF-hand calcium-binding domain-containing protein 5	2	2		98621.6
	A5A3E0	POTEF_HUMAN	POTEF	POTEF	POTE ankyrin domain family member F	1	0		33765.2	41693.8
	A5D8V6	VP37C_HUMAN	VPS37C	VPS37C	Vacuolar protein sorting-associated protein 37C	1	1	68453.3	64510.7	62972.8
	A5PLL7;A5PLL7-2	PDES1_HUMAN	PEDS1	PEDS1	Plasmanylethanolamine desaturase 1	3	1	27202.5	23365.2	26007.5
	A5PLN9;A5PLN9-2;A5PLN9-4;A5PLN9-5	TPC13_HUMAN	TRAPPC13	TRAPPC13	Trafficking protein particle complex subunit 13	4	4	43326.6	48622.7	55855.6
	A5YKK6	CNOT1_HUMAN	CNOT1	CNOT1	CCR4-NOT transcription complex subunit 1	76	76	217296	217717	235049
	A6H8Y1;A6H8Y1-6;A6H8Y1-7	BDP1_HUMAN	BDP1	BDP1	Transcription factor TFIIIB component B'' homolog	5	5	23060.5	17036.1	16716.9
	A6NCE7;Q9GZQ8	MLP3B_HUMAN;MP3B2_HUMAN	MAP1LC3B;MAP1LC3B2	MAP1LC3B	Microtubule-associated proteins 1A/1B light chain 3 beta 2	2	0	91249.9	100005	95644.4
	A6ND36	FA83G_HUMAN	FAM83G	FAM83G	Protein FAM83G	2	2	15932.8	13771	16299.9
	A6NDB9	PALM3_HUMAN	PALM3	PALM3	Paralemmin-3	12	12	38082.8	35046.5	38167.3
	A6NDG6	PGP_HUMAN	PGP	PGP	Glycerol-3-phosphate phosphatase	9	9	137456	143041	184542
	A6NDU8	RIMC1_HUMAN	RIMOC1	RIMOC1	RAB7A-interacting MON1-CCZ1 complex subunit 1	8	8	94278.2	101457	88574
	A6NE02	BTBDH_HUMAN	BTBD17	BTBD17	BTB/POZ domain-containing protein 17	2	2	15536.8	12978.4	9692.91
	A6NED2	RCCD1_HUMAN	RCCD1	RCCD1	RCC1 domain-containing protein 1	3	3	25352.4	24477.9	22271.3
	A6NF51	A6NF51_HUMAN	BPNT1	BPNT1	3'(2'),5'-bisphosphate nucleotidase 1	1	1	6842.02	8054.15	9735.48
	A6NFI3	ZN316_HUMAN	ZNF316	ZNF316	Zinc finger protein 316	6	6	33311.9	28545.5	26150.9
	A6NGN9	IGLO5_HUMAN	IGLON5	IGLON5	IgLON family member 5	5	5	142504	123795	176051
	A6NGU5;P19440	GGT1_HUMAN;GGT3_HUMAN	GGT1;GGT3P	GGT1	Putative glutathione hydrolase 3 proenzyme	5	0	16743	17147.2	22628.2
	A6NHG8	A6NHG8_HUMAN	TRAF3	TRAF3	TNF receptor-associated factor	1	1			26797.9
	A6NHR9	SMHD1_HUMAN	SMCHD1	SMCHD1	Structural maintenance of chromosomes flexible hinge domain-containing protein 1	66	66	134829	139965	128271
	A6NHX0	CAST2_HUMAN	CASTOR2	CASTOR2	Cytosolic arginine sensor for mTORC1 subunit 2	5	5	67122	73907.7	68398.9
	A6NI28	RHG42_HUMAN	ARHGAP42	ARHGAP42	Rho GTPase-activating protein 42	7	7	45904.9	47172.3	47421
	A6NIH7	U119B_HUMAN	UNC119B	UNC119B	Protein unc-119 homolog B	10	9	72948.3	76164.9	79124.3
	A6NIX2	WTIP_HUMAN	WTIP	WTIP	Wilms tumor protein 1-interacting protein	2	2	4901.16	4301.91	3913.07
	A6NJ78	MET15_HUMAN	METTL15	METTL15	12S rRNA N(4)-cytidine methyltransferase METTL15	5	5	44565.3	37549.1	35853.6
	A6NK58	LIPT2_HUMAN	LIPT2	LIPT2	Octanoyl-[acyl-carrier-protein]:protein N-octanoyltransferase LIPT2, mitochondrial	2	2	46658.8	45177.8
	A6NKD9	CC85C_HUMAN	CCDC85C	CCDC85C	Coiled-coil domain-containing protein 85C	12	12	34901.7	34120.9	36471.4
	A6NKF1	SAC31_HUMAN	SAC3D1	SAC3D1	SAC3 domain-containing protein 1	5	5	47960.5	51190.6	59932
	A6NKT7	RGPD3_HUMAN	RGPD3	RGPD3	RanBP2-like and GRIP domain-containing protein 3	1	0	153241	144999	130964
	A6NMB9	FIGL2_HUMAN	FIGNL2	FIGNL2	Fidgetin-like protein 2	9	9	40184.6	39467.4	41240
	A6NNT2	CP096_HUMAN	C16orf96	C16orf96	Uncharacterized protein C16orf96	1	1	35331.8
	A6QL63;A6QL63-2;A6QL63-3	ABTB3_HUMAN	ABTB3	ABTB3	Ankyrin repeat and BTB/POZ domain-containing protein 3	3	3	26982.3	42861.8	43713
	A6ZKI3	RTL8C_HUMAN	RTL8C	RTL8C	Retrotransposon Gag-like protein 8C	1	0	46303.7	46300.6	63884.8
	A7E2V4;A7E2V4-3;A7E2V4-4;A7E2V4-5	ZSWM8_HUMAN	ZSWIM8	ZSWIM8	Zinc finger SWIM domain-containing protein 8	12	12	32528.7	31780.2	26353.2
	A7KAX9	RHG32_HUMAN	ARHGAP32	ARHGAP32	Rho GTPase-activating protein 32	12	11	107962	103304	96423.8
	A7MCY6	TBKB1_HUMAN	TBKBP1	TBKBP1	TANK-binding kinase 1-binding protein 1	5	5	18101.5	14987.6	15361.5
	A8CG34	P121C_HUMAN	POM121C	POM121C	Nuclear envelope pore membrane protein POM 121C	14	2	48745.6	40138.3	36763.7
	A8K8P3;A8K8P3-10;A8K8P3-2;A8K8P3-3;A8K8P3-4;A8K8P3-5;A8K8P3-9	SFI1_HUMAN	SFI1	SFI1	Protein SFI1 homolog	1	1			1116.78
	A8MQ14	ZN850_HUMAN	ZNF850	ZNF850	Zinc finger protein 850	3	3	2568.96	2146.44	3001.05
	A8MSY1	A8MSY1_HUMAN	STIMATE-MUSTN1	STIMATE-MUSTN1	Musculoskeletal embryonic nuclear protein 1	2	0	5630.85	5135.41	5625.58
	A8MT69	CENPX_HUMAN	CENPX	CENPX	Centromere protein X	4	4	16770	23309.2	33291.2
	A8MVW0	F1712_HUMAN	FAM171A2	FAM171A2	Protein FAM171A2	9	8	41427.4	53954.5	41770
	A8MWD9;P62308	RUXGL_HUMAN;RUXG_HUMAN	SNRPG;SNRPGP15	SNRPG	Putative small nuclear ribonucleoprotein G-like protein 15	5	0	1.33678e+06	1.5253e+06	1.94516e+06
	A8MXP9	A8MXP9_HUMAN	MATR3	MATR3	Matrin 3	39	39	1.40444e+06	1.51117e+06	1.25012e+06
	A8MXV4	NUD19_HUMAN	NUDT19	NUDT19	Acyl-coenzyme A diphosphatase NUDT19	5	5	97487.1	100801	63949.9
	A9IYQ1	A9IYQ1_HUMAN	PDS5B	PDS5B	PDS5 cohesin associated factor B (Fragment)	1	1	36179.7		35437.7
	A9UHW6;A9UHW6-2;A9UHW6-3	MI4GD_HUMAN	MIF4GD	MIF4GD	MIF4G domain-containing protein	5	5	47618.1	44255.2	39855
	B1ALY0	B1ALY0_HUMAN	PALM2AKAP2	PALM2AKAP2	PALM2 and AKAP2 fusion (Fragment)	1	1	17245.1		21497.2
	B2RBV5	MR1L2_HUMAN	MRFAP1L2	MRFAP1L2	MORF4 family associated protein 1 like 2	3	3	120301	112390	143936
	B2RTY4-5	MYO9A_HUMAN	MYO9A	MYO9A	Isoform 5 of Unconventional myosin-IXa	3	3	8418.83	8513.25	6351.53
	B4DL54	B4DL54_HUMAN	CHURC1-FNTB	CHURC1-FNTB	Protein farnesyltransferase subunit beta	1	0	17313.7	15474.8	12553.2
	B4DLN1	B4DLN1_HUMAN			cDNA FLJ60124, highly similar to Mitochondrial dicarboxylate carrier	11	11	496829	428987	642765
	B5MCX3	B5MCX3_HUMAN	SEPTIN2	SEPTIN2	Septin-2	17	17	1.38133e+06	1.35801e+06	1.39454e+06
	B7Z9C2;F8VV59;F8W118	B7Z9C2_HUMAN;F8VV59_HUMAN;F8W118_HUMAN	NAP1L1	NAP1L1	Nucleosome assembly protein 1 like 1	1	1		8068.36	6549.17
	B7ZAQ6;B7ZAQ6-2;B7ZAQ6-3;P0CG08	GPHRA_HUMAN;GPHRB_HUMAN	GPR89A;GPR89B	GPR89A	Golgi pH regulator A	2	0	25376.1	18403.7	22551.6
	B7ZLF3;A0A286YF50	A0A286YF50_HUMAN;B7ZLF3_HUMAN	LOC728743	LOC728743	C2H2-type domain-containing protein	1	1	5610.25		7615.85
	B7ZM99	B7ZM99_HUMAN	MTHFD1L	MTHFD1L	formate--tetrahydrofolate ligase	32	32	199110	212631	213683
	B8ZZ50	B8ZZ50_HUMAN	EIF4E2	EIF4E2	Eukaryotic translation initiation factor 4E family member 2	1	1	11621.3	13271.2	10523.9
	C0HLS1	OSCRI_HUMAN	SCRIB	SCRIB	SCRIB overlapping open reading frame protein	2	2	37587.5	33253.6	38477.9
	C4AMC7;Q6VEQ5	WASH2_HUMAN;WASH3_HUMAN	WASH2P;WASH3P	WASH2P	Putative WAS protein family homolog 3	6	0	64560.2	81337.6	66767.4
	C9J0Q5;C9JE98	C9J0Q5_HUMAN;C9JE98_HUMAN	NCOR2	NCOR2	Nuclear receptor corepressor 2	1	1	25300	28747	22549
	C9J2V2	C9J2V2_HUMAN	IKBKG	IKBKG	NF-kappa-B essential modulator	10	10	45456	48490.7	50997.7
	C9J406	C9J406_HUMAN	IMMT	IMMT	MICOS complex subunit MIC60	3	3	60364.9	54693.1	45485.6
	C9J470	C9J470_HUMAN	NCAPH	NCAPH	Condensin complex subunit 2 (Fragment)	1	1			19803.7
	C9J5M4	C9J5M4_HUMAN	EVA1A	EVA1A	Eva-1 homolog A, regulator of programmed cell death (Fragment)	1	1	16615.3	26908.4	43813
	C9J7I0	UMAD1_HUMAN	UMAD1	UMAD1	UBAP1-MVB12-associated (UMA)-domain containing protein 1	2	2	26640.3	23292.7	29614.9
	C9JA41	C9JA41_HUMAN	ELAPOR2	ELAPOR2	Endosome-lysosome associated apoptosis and autophagy regulator family member 2	1	1	4914.94		5166.16
	C9JKI7	C9JKI7_HUMAN	MAD1L1	MAD1L1	Mitotic arrest deficient 1 like 1 (Fragment)	1	1		25908	27955.5
	C9JLJ1	C9JLJ1_HUMAN	TBL1XR1	TBL1XR1	TBL1X/Y related 1	18	12	170476	163344	166346
	C9JLR9	ZFTA_HUMAN	ZFTA	ZFTA	Zinc finger translocation-associated protein	1	1	22061.1	18473.8	21515.8
	C9JLW8	MCRI1_HUMAN	MCRIP1	MCRIP1	Mapk-regulated corepressor-interacting protein 1	6	6	513074	443367	624180
	C9JNU9	C9JNU9_HUMAN	USP4	USP4	ubiquitinyl hydrolase 1	2	0	51241.1	51823.5	56942.6
	C9JPP3	C9JPP3_HUMAN	RBBP4	RBBP4	RB binding protein 4, chromatin remodeling factor (Fragment)	1	1			29338.7
	C9JQL5	DSA2D_HUMAN			Putative dispanin subfamily A member 2d	1	1	15076.4	20675.6	10776.1
	C9JVB3	C9JVB3_HUMAN	RSRC1	RSRC1	Arginine and serine rich coiled-coil 1	1	1		9885.64
	D3DQV9;H0Y3P2	D3DQV9_HUMAN;H0Y3P2_HUMAN	EIF4G2	EIF4G2	Eukaryotic translation initiation factor 4 gamma 2	38	38	367091	381925	377853
	D6R9W4	D6R9W4_HUMAN	DBN1	DBN1	Drebrin 1 (Fragment)	1	1	58697.6	48400.8	44194.2
	D6REX3	D6REX3_HUMAN	SEC31A	SEC31A	Protein transport protein Sec31A	38	37	312041	328974	370554
	D6RF23	D6RF23_HUMAN	RACK1	RACK1	Small ribosomal subunit protein RACK1	1	1	35253.4	34607.8
	D6RHC4	D6RHC4_HUMAN	ANKHD1	ANKHD1	Ankyrin repeat and KH domain containing 1 (Fragment)	2	2	4600.2	5956.69	10870
	E5RG31	E5RG31_HUMAN	MCM4	MCM4	DNA replication licensing factor MCM4 (Fragment)	1	1		10498.3
	E5RI56	E5RI56_HUMAN			S-phase kinase-associated protein 1	15	15	1.28662e+06	1.26531e+06	1.50819e+06
	E5RI98	E5RI98_HUMAN	NPM1	NPM1	Nucleophosmin	1	1	55659.9	60232.9	102196
	E5RIZ5	E5RIZ5_HUMAN	PPIA	PPIA	Peptidylprolyl isomerase A	2	1	1.91532e+06	1.83744e+06	1.91782e+06
	E5RK69	E5RK69_HUMAN	ANXA6	ANXA6	Annexin	1	1	152265	109976	134041
	E7EN19	E7EN19_HUMAN	MAP4K4	MAP4K4	non-specific serine/threonine protein kinase	2	2	7080	7779.34	7138.02
	E7EQ69	E7EQ69_HUMAN	NAA50	NAA50	N-alpha-acetyltransferase 50	11	11	556717	489093	559561
	E7ERJ7	E7ERJ7_HUMAN	PABPC1	PABPC1	Polyadenylate-binding protein	2	1	2.0001e+06	1.75927e+06	1.81088e+06
	E7ERS3	E7ERS3_HUMAN	ZC3H18	ZC3H18	Zinc finger CCCH-type containing 18	21	21	148448	152447	207398
	E9PAV3;E9PAV3-2;Q13765	NACAM_HUMAN;NACA_HUMAN	NACA	NACA	Nascent polypeptide-associated complex subunit alpha, muscle-specific form	8	6	3.70296e+06	3.49754e+06	3.62471e+06
	E9PCH4	E9PCH4_HUMAN			Rap guanine nucleotide exchange factor 6	21	19	52416	53459.6	53915.8
	E9PCW1	E9PCW1_HUMAN	GOSR1	GOSR1	Golgi SNAP receptor complex member 1	1	1	32880.4	23465.6	21394.8
	E9PCZ3	E9PCZ3_HUMAN	INPP4B	INPP4B	Inositol polyphosphate-4-phosphatase type II B	9	9	78081.7	73879.1	76988.7
	E9PEP6	E9PEP6_HUMAN	NRP1	NRP1	Neuropilin	19	19	62004.9	64994.6	52613.8
	E9PFY5;F8W9I4	E9PFY5_HUMAN;F8W9I4_HUMAN	AFDN	AFDN	Afadin, adherens junction formation factor (Fragment)	1	1	24474.4	17305.3	14048.2
	E9PIE4	E9PIE4_HUMAN	MTCH2	MTCH2	Mitochondrial carrier 2	1	1	137797	122828	91590.5
	E9PL57	E9PL57_HUMAN	NEDD8-MDP1	NEDD8-MDP1	NEDD8-MDP1 readthrough (Fragment)	5	0	236016	229120	420849
	E9PLY5	E9PLY5_HUMAN	MACF1	MACF1	Microtubule actin crosslinking factor 1 (Fragment)	1	1	50849	52102.7	52064.8
	E9PQA1	E9PQA1_HUMAN	C11orf58	C11orf58	Small acidic protein	2	1	190212	170699	185135
	E9PRC5	E9PRC5_HUMAN			Uncharacterized protein	1	1	3066.73	3034.74
	E9PRG8	CK098_HUMAN	C11orf98	C11orf98	Uncharacterized protein C11orf98	3	3	84996.5	133074	101712
	E9PSI1	E9PSI1_HUMAN			Transmembrane 9 superfamily member	10	10	311935	231928	297723
	F2Z2T2	F2Z2T2_HUMAN	XPA	XPA	XPA, DNA damage recognition and repair factor	2	2	71838.5	79615.4	70554.8
	F2Z2X0	F2Z2X0_HUMAN	NME4	NME4	Nucleoside diphosphate kinase	7	7	122044	120097	109984
	F5GXS2	F5GXS2_HUMAN	ACTN4	ACTN4	Alpha-actinin-4	58	38	2.32855e+06	2.40445e+06	2.48675e+06
	F5GZ99	F5GZ99_HUMAN	KDM5A	KDM5A	Lysine demethylase 5A (Fragment)	1	1		38799.2	30770.9
	F5H0Z3	F5H0Z3_HUMAN	LRP6	LRP6	LDL receptor related protein 6 (Fragment)	1	1	16430.4
	F5H726	F5H726_HUMAN	TCP1	TCP1	T-complex protein 1 subunit alpha (Fragment)	1	1	40294.8	28991.7	44897.4
	F5H875	F5H875_HUMAN	CHMP1A	CHMP1A	Charged multivesicular body protein 1a	4	4	164733	204865	278596
	F6RGN5	F6RGN5_HUMAN	SLC25A10	SLC25A10	Solute carrier family 25 member 10	2	2	925909	747289	876735
	F8VRH0	F8VRH0_HUMAN	PCBP2	PCBP2	Poly(rC) binding protein 2 (Fragment)	1	1	8658.32	8376.62
	F8VUJ3	F8VUJ3_HUMAN	POC1B-GALNT4	POC1B-GALNT4	Polypeptide N-acetylgalactosaminyltransferase	11	0	30742.9	39502.4	37542.9
	F8VX10	F8VX10_HUMAN	KANSL2	KANSL2	KAT8 regulatory NSL complex subunit 2	5	5	29814.3	30373.3	27541.8
	F8VZX2;H3BRU6	F8VZX2_HUMAN;H3BRU6_HUMAN	PCBP2	PCBP2	Poly(rC) binding protein 2	1	1	191418	165475	142967
	F8W1H0	F8W1H0_HUMAN	C17orf49	C17orf49	Chromosome 17 open reading frame 49	1	1	27008.8	30114.3	26187.7
	F8W7C6	F8W7C6_HUMAN	RPL10	RPL10	Large ribosomal subunit protein uL16	1	1	25138	13431.9	21985.1
	F8W8C2	F8W8C2_HUMAN	VEZT	VEZT	Vezatin (Fragment)	11	11	17208.4	17227.7	13863.6
	F8WCM5;P01308	INSR2_HUMAN;INS_HUMAN	INS;INS-IGF2	INS	Insulin, isoform 2	1	0	100803		235897
	F8WCV1	F8WCV1_HUMAN	HJURP	HJURP	Holliday junction recognition protein	1	1	7374.78	5070	6138.32
	G2XKQ0	SUMO5_HUMAN	SUMO1P1	SUMO1P1	Small ubiquitin-related modifier 5	2	0	856119	773360	753943
	G3V1A6	G3V1A6_HUMAN	GSDMD	GSDMD	Gasdermin D	7	7	41981.2	55058.5	53370.4
	G3V325	G3V325_HUMAN	ATP5MF-PTCD1	ATP5MF-PTCD1	ATP5MF-PTCD1 readthrough	10	0	164178	171714	143985
	G3V5V7	G3V5V7_HUMAN	HNRNPC	HNRNPC	Heterogeneous nuclear ribonucleoprotein C (Fragment)	1	1	17615.4	12869.2	16409
	G5E948	G5E948_HUMAN	MAP4K4	MAP4K4	non-specific serine/threonine protein kinase	1	1	47773.3	39324.1	34518.2
	G5E972	G5E972_HUMAN	TMPO	TMPO	Thymopoietin	2	2	10355.4	8828.93
	G5E979	G5E979_HUMAN	ATG4A	ATG4A	Cysteine protease	2	2	23997.1	23597.4	19377.7
	H0Y2V7	H0Y2V7_HUMAN	NINL	NINL	Ninein like (Fragment)	2	2	13414.8		21668.2
	H0Y459	H0Y459_HUMAN	NCOR1	NCOR1	Nuclear receptor corepressor 1	45	42	51850.5	47244.9	49269.5
	H0Y5C6	H0Y5C6_HUMAN	FLNA	FLNA	Filamin A (Fragment)	1	1	3229.52	8434.05	5187.4
	H0Y6A0	H0Y6A0_HUMAN	ARFGAP3	ARFGAP3	ADP ribosylation factor GTPase activating protein 3 (Fragment)	1	1	6079.55	13722.6	13706.4
	H0Y7T8	H0Y7T8_HUMAN	AMPH	AMPH	Amphiphysin (Fragment)	1	1			13142
	H0Y8U5	H0Y8U5_HUMAN	CTBP1	CTBP1	C-terminal binding protein 1	1	1	9064.53	15886.3	18065.4
	H0Y8U8;J3KN01	H0Y8U8_HUMAN;J3KN01_HUMAN	AFDN	AFDN	Afadin, adherens junction formation factor	57	57	1.28472e+06	1.29542e+06	1.29624e+06
	H0Y990	H0Y990_HUMAN	ABCE1	ABCE1	ATP binding cassette subfamily E member 1 (Fragment)	1	1	5728.89	4569.92
	H0Y9Y2	H0Y9Y2_HUMAN	BOD1L1	BOD1L1	Biorientation of chromosomes in cell division 1 like 1	66	62	586630	544405	640079
	H0YAB3	H0YAB3_HUMAN	SEC31A	SEC31A	SEC31 homolog A, COPII coat complex component (Fragment)	1	1	43572.3	42247.2	49077.9
	H0YAH3	H0YAH3_HUMAN	GALNT7	GALNT7	Polypeptide N-acetylgalactosaminyltransferase	1	1	25161.1	23141.4	25979.3
	H0YAN4	H0YAN4_HUMAN	LARP1	LARP1	La ribonucleoprotein 1, translational regulator (Fragment)	1	1	17412.8	15976	11992.9
	H0YBA1	H0YBA1_HUMAN	PCM1	PCM1	Pericentriolar material 1	49	49	118418	121570	123257
	H0YBJ8	H0YBJ8_HUMAN	MTDH	MTDH	Metadherin (Fragment)	1	1	10902.1		9548.56
	H0YBK1	H0YBK1_HUMAN	HNRNPH1	HNRNPH1	Heterogeneous nuclear ribonucleoprotein H1 (Fragment)	1	1	13227.2	11152.1
	H0YDF6	H0YDF6_HUMAN	NHSL1	NHSL1	NHS like 1 (Fragment)	1	1	18867.6	15214
	H0YDM4	H0YDM4_HUMAN	HOOK3	HOOK3	Hook microtubule tethering protein 3	1	1	26587.4	17393.5	27520.2
	H0YDN5	H0YDN5_HUMAN	USP50	USP50	Ubiquitin specific peptidase 50 (Fragment)	1	1	18680.2		11488.7
	H0YE97;H0YEY8	H0YE97_HUMAN;H0YEY8_HUMAN	PICALM	PICALM	Phosphatidylinositol binding clathrin assembly protein (Fragment)	1	1	30801.1	28775.9	37364.3
	H0YGQ3	H0YGQ3_HUMAN	MPDZ	MPDZ	Multiple PDZ domain crumbs cell polarity complex component (Fragment)	1	1	17574.6		14843
	H0YGR4	H0YGR4_HUMAN	REXO2	REXO2	RNA exonuclease 2 (Fragment)	9	9	320171	325569	381575
	H0YIV9	H0YIV9_HUMAN			Glutamyl-tRNA(Gln) amidotransferase subunit C, mitochondrial (Fragment)	7	7	74359.8	59632.2	93732.3
	H0YJF7	H0YJF7_HUMAN	VRK1	VRK1	non-specific serine/threonine protein kinase	21	21	252814	280713	290171
	H0YJH7	H0YJH7_HUMAN	TMPO	TMPO	Thymopoietin (Fragment)	1	1	11476.2	7307.64	9472.69
	H0YK48	H0YK48_HUMAN	TPM1	TPM1	Tropomyosin alpha-1 chain	4	4	161363	133620	172316
	H0YLW0	H0YLW0_HUMAN	SRP14	SRP14	Signal recognition particle 14	1	1		17268.2	60059.8
	H0YLW6	H0YLW6_HUMAN	SHF	SHF	Src homology 2 domain containing F	4	4	74677.5	57783.5	62836.5
	H0YNP8	H0YNP8_HUMAN	TCF12	TCF12	Transcription factor 12	1	1	12162	7856.11	8484.84
	H3BMS0	H3BMS0_HUMAN	RNPS1	RNPS1	RNA-binding protein with serine-rich domain 1	1	1		7196.75
	H3BPE1;H3BQK9	H3BPE1_HUMAN;H3BQK9_HUMAN	MACF1	MACF1	Microtubule actin crosslinking factor 1	201	196	217248	232129	243486
	H3BVE0	H3BVE0_HUMAN	BOLA2-SMG1P6	BOLA2-SMG1P6	BOLA2-SMG1P6 readthrough	2	0	275016	296657	338377
	H7BY16	H7BY16_HUMAN	NCL	NCL	Nucleolin	30	30	4.07257e+06	4.34894e+06	5.73981e+06
	H7BZG6	H7BZG6_HUMAN	AP1S2	AP1S2	AP complex subunit sigma	1	1	16237.3	16401.8	13783.8
	H7BZV7;A0A8V8TQW5	A0A8V8TQW5_HUMAN;H7BZV7_HUMAN	GULP1	GULP1	GULP PTB domain containing engulfment adaptor 1	1	1		2702.6	2945.99
	H7C144	H7C144_HUMAN	ACTN4	ACTN4	Alpha-actinin-4	1	1	44053.5	35381	46907.1
	H7C192	H7C192_HUMAN	ARL6IP6	ARL6IP6	ADP ribosylation factor like GTPase 6 interacting protein 6	3	3	30784	17275.5	23467.5
	H7C3G6	H7C3G6_HUMAN	MPRIP	MPRIP	Myosin phosphatase Rho interacting protein (Fragment)	1	1	11648.9	8180.95	9388.76
	H7C3M7	H7C3M7_HUMAN	FARP2	FARP2	FERM, ARH/RhoGEF and pleckstrin domain protein 2 (Fragment)	2	2	24338.4	23980.9	25518.7
	H7C417	H7C417_HUMAN			CRAL-TRIO domain-containing protein (Fragment)	5	5	44732.4	45701.8	54265.5
	H7C427	H7C427_HUMAN	IQCE	IQCE	IQ motif containing E (Fragment)	2	2	11810.9	20285.7	18576.1
	H7C4E5	H7C4E5_HUMAN	COX17	COX17	Cytochrome c oxidase copper chaperone COX17 (Fragment)	4	4	135457	102850	148534
	H7C4S4	H7C4S4_HUMAN	FXR1	FXR1	FMR1 autosomal homolog 1 (Fragment)	1	1		174501
	H7C561	H7C561_HUMAN	SF1	SF1	Splicing factor 1	3	3	18928.6	22797.5	17546.2
	H7C5E2	H7C5E2_HUMAN	BCAP29	BCAP29	B-cell receptor-associated protein (Fragment)	4	0	30292.7	34202.5	23210.6
	H7C5L4	H7C5L4_HUMAN	FLNB	FLNB	Filamin B (Fragment)	1	1		4235.98
	I3L0A0	I3L0A0_HUMAN	PEDS1-UBE2V1	PEDS1-UBE2V1	HCG2044781	3	0	1.51639e+06	1.53264e+06	1.5885e+06
	I3L1Z9	I3L1Z9_HUMAN	ANKFY1	ANKFY1	Ankyrin repeat and FYVE domain containing 1 (Fragment)	1	1	2943.18
	I3L301	I3L301_HUMAN	TFAP4	TFAP4	Transcription factor AP-4	2	2	14562.5	11305.5	9960.32
	I3L466	I3L466_HUMAN	CREBBP	CREBBP	histone acetyltransferase (Fragment)	1	1	9057.62	7707.49	6649.17
	I3L4I6	I3L4I6_HUMAN	ZNF267	ZNF267	Zinc finger protein 267	1	1			22330.3
	I3L4N8	I3L4N8_HUMAN	ACTG1	ACTG1	Actin gamma 1	22	0	6.32963e+06	8.19598e+06	9.4269e+06
	J3KN67	J3KN67_HUMAN	TPM3	TPM3	Tropomyosin 3	4	4	1.42052e+06	1.66758e+06	2.12289e+06
	J3KND1	J3KND1_HUMAN	SAAL1	SAAL1	Serum amyloid A like 1	1	1	34893.2	36580	52597.6
	J3KNZ9	J3KNZ9_HUMAN	FBRS	FBRS	Fibrosin	5	5	63198.4	71288.1	62027.2
	J3KP06	J3KP06_HUMAN	LMO7	LMO7	LIM domain 7	6	6	13343.1	13605.7	12245.1
	J3KQ32	J3KQ32_HUMAN	OLA1	OLA1	Obg-like ATPase 1	21	21	491670	517480	580925
	J3KS23	J3KS23_HUMAN	CBFB	CBFB	Core-binding factor subunit beta	2	2	55693.3	64210	74033.2
	J3KS46	J3KS46_HUMAN	HEXD	HEXD	Hexosaminidase D	1	1		4081.06
	J3QR07	J3QR07_HUMAN	YTHDC1	YTHDC1	YTH domain-containing family protein	13	13	94963.6	99217.6	110653
	J3QR62	J3QR62_HUMAN	DDX5	DDX5	DEAD-box helicase 5 (Fragment)	1	1		1987.74
	J3QT87	J3QT87_HUMAN	CRBN	CRBN	Protein cereblon (Fragment)	6	6	65406.5	55238.8	74288
	K7EJE8;K7EKE6	K7EJE8_HUMAN;K7EKE6_HUMAN	LONP1	LONP1	Lon protease homolog, mitochondrial	1	1	20679.1	25377.7	22701
	K7ELL7	K7ELL7_HUMAN	PRKCSH	PRKCSH	Glucosidase 2 subunit beta	1	1	90664	56220.3	60965.3
	K7EMV4	K7EMV4_HUMAN	ELOF1	ELOF1	Transcription elongation factor 1 homolog	1	1		16859.7
	K7EMZ9	K7EMZ9_HUMAN	LSM14A	LSM14A	LSM14A mRNA processing body assembly factor (Fragment)	1	1	12478.1	10659.9	8047.21
	K7ENF0	K7ENF0_HUMAN	NARS1	NARS1	Asparaginyl-tRNA synthetase 1	2	2	33325.6	48306.9	44528.1
	K7ENW2	K7ENW2_HUMAN	ZNF286A	ZNF286A	Zinc finger protein 286A (Fragment)	2	1	31894.5	40824.5	52791.2
	K7EPS6	K7EPS6_HUMAN	HDGFL2	HDGFL2	HDGF like 2 (Fragment)	1	1	17665	15440.3	18508.7
	K7EPT8	K7EPT8_HUMAN	GFAP	GFAP	Glial fibrillary acidic protein (Fragment)	1	1	36991.9	37399.5	59290.8
	K7EQU4	K7EQU4_HUMAN	SAFB2	SAFB2	Scaffold attachment factor B2 (Fragment)	1	1	6576.17	3994.91
	K7ER90	K7ER90_HUMAN	EIF3G	EIF3G	Eukaryotic translation initiation factor 3 subunit G (Fragment)	1	1	11710.3	7875.8	7993.67
	K7ERQ8	K7ERQ8_HUMAN			PCAF N-terminal domain-containing protein (Fragment)	2	2	195916	162730	231853
	K7ES11	K7ES11_HUMAN	UBE2O	UBE2O	Ubiquitin conjugating enzyme E2 O (Fragment)	2	2	3111.45	5767.22	3874.29
	K7ES79	K7ES79_HUMAN	PSENEN	PSENEN	Gamma-secretase subunit PEN-2	1	1	22027.6	19149.2	18822.9
	L0R6Q1	S35U4_HUMAN	SLC35A4	SLC35A4	SLC35A4 upstream open reading frame protein	5	5	150487	160108	225656
	L0R819	ASURF_HUMAN	ASDURF	ASDURF	ASNSD1 upstream open reading frame protein	3	3	61063.3	58681.6	84177
	L0R8F8	MIDUO_HUMAN	MIEF1	MIEF1	Mitochondrial ribosome and complex I assembly factor AltMIEF1	3	3	52677	67392.3	62258.3
	M0QXF9	M0QXF9_HUMAN	BCAT2	BCAT2	Branched-chain-amino-acid aminotransferase (Fragment)	5	5	33025.8	35552.2	37218.7
	M0QY01	M0QY01_HUMAN	EPS15L1	EPS15L1	Epidermal growth factor receptor pathway substrate 15 like 1 (Fragment)	1	1	51861.6	53450.7	53480.2
	M0QYT0	M0QYT0_HUMAN			RRM domain-containing protein (Fragment)	1	1	19337	30000.7	90284.9
	M0QZM1	M0QZM1_HUMAN	HNRNPM	HNRNPM	Heterogeneous nuclear ribonucleoprotein M (Fragment)	1	1	230622	254046	204281
	M0R1K3	M0R1K3_HUMAN	PAFAH1B3	PAFAH1B3	Platelet activating factor acetylhydrolase 1b catalytic subunit 3 (Fragment)	1	1	1670.76		1200.56
	M5A8F1	SUPYN_HUMAN	ERVH48-1	ERVH48-1	Suppressyn	5	5	33031	43211.9	30707.5
	O00115;O00115-2	DNS2A_HUMAN	DNASE2	DNASE2	Deoxyribonuclease-2-alpha	4	4	120622	89755.9	124304
	O00116	ADAS_HUMAN	AGPS	AGPS	Alkyldihydroxyacetonephosphate synthase, peroxisomal	24	24	170406	170150	128459
	O00124	UBXN8_HUMAN	UBXN8	UBXN8	UBX domain-containing protein 8	4	4	14993.1	14555.6	15770.2
	O00139;O00139-1;O00139-2;O00139-4;O00139-5	KIF2A_HUMAN	KIF2A	KIF2A	Kinesin-like protein KIF2A	19	18	198777	204893	200643
	O00148	DX39A_HUMAN	DDX39A	DDX39A	ATP-dependent RNA helicase DDX39A	6	6	211666	247047	209802
	O00151	PDLI1_HUMAN	PDLIM1	PDLIM1	PDZ and LIM domain protein 1	18	18	1.07766e+06	1.1199e+06	1.32705e+06
	O00154-4	BACH_HUMAN	ACOT7	ACOT7	Isoform 4 of Cytosolic acyl coenzyme A thioester hydrolase	14	12	380342	440612	602335
	O00159	MYO1C_HUMAN	MYO1C	MYO1C	Unconventional myosin-Ic	31	30	156108	147950	163727
	O00161	SNP23_HUMAN	SNAP23	SNAP23	Synaptosomal-associated protein 23	11	11	304202	282642	385825
	O00165;O00165-2	HAX1_HUMAN	HAX1	HAX1	HCLS1-associated protein X-1	8	8	39545	41039.8	39984.3
	O00170	AIP_HUMAN	AIP	AIP	AH receptor-interacting protein	12	12	151152	155358	156620
	O00178	GTPB1_HUMAN	GTPBP1	GTPBP1	GTP-binding protein 1	14	14	196712	204713	200789
	O00186	STXB3_HUMAN	STXBP3	STXBP3	Syntaxin-binding protein 3	15	15	612319	576064	580783
	O00189	AP4M1_HUMAN	AP4M1	AP4M1	AP-4 complex subunit mu-1	5	5	38692.1	38719.2	26551.8
	O00192;O00192-2	ARVC_HUMAN	ARVCF	ARVCF	Splicing regulator ARVCF	15	15	51505.7	50899.6	40414.3
	O00193	SMAP_HUMAN	SMAP	SMAP	Small acidic protein	3	0	1.07752e+06	1.78415e+06	2.32737e+06
	O00203;O00203-3	AP3B1_HUMAN	AP3B1	AP3B1	AP-3 complex subunit beta-1	32	24	109133	118203	116680
	O00213;O00213-2	APBB1_HUMAN	APBB1	APBB1	Amyloid beta precursor protein binding family B member 1	6	6	37287.7	36379.2	28395.1
	O00214-2	LEG8_HUMAN	LGALS8	LGALS8	Isoform 2 of Galectin-8	12	12	69645.2	67933	63044.7
	O00217	NDUS8_HUMAN	NDUFS8	NDUFS8	NADH dehydrogenase [ubiquinone] iron-sulfur protein 8, mitochondrial	3	3	204124	187129	225657
	O00221	IKBE_HUMAN	NFKBIE	NFKBIE	NF-kappa-B inhibitor epsilon	6	6	51654.1	55624.5	50535.6
	O00231	PSD11_HUMAN	PSMD11	PSMD11	26S proteasome non-ATPase regulatory subunit 11	23	23	683361	669544	704970
	O00232	PSD12_HUMAN	PSMD12	PSMD12	26S proteasome non-ATPase regulatory subunit 12	23	23	342906	382161	398882
	O00233	PSMD9_HUMAN	PSMD9	PSMD9	26S proteasome non-ATPase regulatory subunit 9	10	10	187751	220082	278423
	O00244	ATOX1_HUMAN	ATOX1	ATOX1	Copper transport protein ATOX1	4	4	1.00205e+06	951638	1.08234e+06
	O00255;O00255-1	MEN1_HUMAN	MEN1	MEN1	Menin	8	8	159128	155350	167811
	O00258;O00258-2	GET1_HUMAN	GET1	GET1	Guided entry of tail-anchored proteins factor 1	2	0	3492.42		4749.08
	O00264	PGRC1_HUMAN	PGRMC1	PGRMC1	Membrane-associated progesterone receptor component 1	12	11	1.84466e+06	1.92929e+06	2.62234e+06
	O00267	SPT5H_HUMAN	SUPT5H	SUPT5H	Transcription elongation factor SPT5	33	33	1.0045e+06	974124	1.03309e+06
	O00267-2	SPT5H_HUMAN	SUPT5H	SUPT5H	Isoform 2 of Transcription elongation factor SPT5	1	1	54398	57972.3	59651.5
	O00268	TAF4_HUMAN	TAF4	TAF4	Transcription initiation factor TFIID subunit 4	16	16	131797	121974	139942
	O00273	DFFA_HUMAN	DFFA	DFFA	DNA fragmentation factor subunit alpha	11	11	339584	319699	384872
	O00273-2	DFFA_HUMAN	DFFA	DFFA	Isoform DFF35 of DNA fragmentation factor subunit alpha	1	1	64636.8	50852.2	66292.8
	O00287	RFXAP_HUMAN	RFXAP	RFXAP	Regulatory factor X-associated protein	4	4	59284.6	53493.7	52748.7
	O00291;O00291-3;O00291-4	HIP1_HUMAN	HIP1	HIP1	Huntingtin-interacting protein 1	35	33	550145	591060	596702
	O00292	LFTY2_HUMAN	LEFTY2	LEFTY2	Left-right determination factor 2	8	2	56319.7	53016.5	47325.5
	O00299	CLIC1_HUMAN	CLIC1	CLIC1	Chloride intracellular channel protein 1	13	13	1.58249e+06	1.89317e+06	2.28536e+06
	O00303	EIF3F_HUMAN	EIF3F	EIF3F	Eukaryotic translation initiation factor 3 subunit F	13	13	747953	849378	980417
	O00308	WWP2_HUMAN	WWP2	WWP2	NEDD4-like E3 ubiquitin-protein ligase WWP2	12	11	59122.9	52620.8	55326.8
	O00311	CDC7_HUMAN	CDC7	CDC7	Cell division cycle 7-related protein kinase	11	11	36378.8	34110	36662.3
	O00330;O00330-3	ODPX_HUMAN	PDHX	PDHX	Pyruvate dehydrogenase protein X component, mitochondrial	10	10	60591.8	62993.6	60035.5
	O00399	DCTN6_HUMAN	DCTN6	DCTN6	Dynactin subunit 6	4	4	83230	72426.6	77008.4
	O00400	ACATN_HUMAN	SLC33A1	SLC33A1	Acetyl-coenzyme A transporter 1	10	10	36649.1	35133.2	32164.7
	O00401	WASL_HUMAN	WASL	WASL	Actin nucleation-promoting factor WASL	12	12	75236.2	84013.6	96214.4
	O00409;O00409-2	FOXN3_HUMAN	FOXN3	FOXN3	Forkhead box protein N3	3	2	9185.05	9610.85	6375.77
	O00410-3	IPO5_HUMAN	IPO5	IPO5	Isoform 3 of Importin-5	39	37	686178	739853	772135
	O00411	RPOM_HUMAN	POLRMT	POLRMT	DNA-directed RNA polymerase, mitochondrial	8	8	16511.2	16323.2	13124.6
	O00418	EF2K_HUMAN	EEF2K	EEF2K	Eukaryotic elongation factor 2 kinase	13	13	49017.3	49431.2	47836.9
	O00422;O00422-2	SAP18_HUMAN	SAP18	SAP18	Histone deacetylase complex subunit SAP18	12	12	320157	347891	403328
	O00423;O00423-3	EMAL1_HUMAN	EML1	EML1	Echinoderm microtubule-associated protein-like 1	20	19	57667.7	58568.8	72832.5
	O00425	IF2B3_HUMAN	IGF2BP3	IGF2BP3	Insulin-like growth factor 2 mRNA-binding protein 3	23	23	752951	753290	687055
	O00429-2	DNM1L_HUMAN	DNM1L	DNM1L	Isoform 4 of Dynamin-1-like protein	32	32	300093	343152	361520
	O00429-7	DNM1L_HUMAN	DNM1L	DNM1L	Isoform 7 of Dynamin-1-like protein	1	1	42230.9	48913.9	24307.7
	O00442;O00442-2	RTCA_HUMAN	RTCA	RTCA	RNA 3'-terminal phosphate cyclase	8	8	76546.1	74925.1	79137
	O00443	P3C2A_HUMAN	PIK3C2A	PIK3C2A	Phosphatidylinositol 4-phosphate 3-kinase C2 domain-containing subunit alpha	44	44	86686.4	84208.8	93375
	O00458;O00458-2	IFRD1_HUMAN	IFRD1	IFRD1	Interferon-related developmental regulator 1	7	7	22107.7	28720	31034.1
	O00459	P85B_HUMAN	PIK3R2	PIK3R2	Phosphatidylinositol 3-kinase regulatory subunit beta	15	14	178617	186180	183090
	O00461	GOLI4_HUMAN	GOLIM4	GOLIM4	Golgi integral membrane protein 4	26	26	323742	321742	323254
	O00462	MANBA_HUMAN	MANBA	MANBA	Beta-mannosidase	14	14	36374.6	35309.4	33133.9
	O00463;O00463-2	TRAF5_HUMAN	TRAF5	TRAF5	TNF receptor-associated factor 5	8	8	28727.8	33138.4	27926.9
	O00468-6	AGRIN_HUMAN	AGRN	AGRN	Isoform 6 of Agrin	30	30	51179.7	47150.4	51324.6
	O00469-2	PLOD2_HUMAN	PLOD2	PLOD2	Isoform 2 of Procollagen-lysine,2-oxoglutarate 5-dioxygenase 2	21	21	158309	169811	175873
	O00470;O00470-2	MEIS1_HUMAN	MEIS1	MEIS1	Homeobox protein Meis1	7	2	46900.3	52033.7	49786.4
	O00471	EXOC5_HUMAN	EXOC5	EXOC5	Exocyst complex component 5	22	22	215085	224663	247124
	O00472;O00472-2	ELL2_HUMAN	ELL2	ELL2	RNA polymerase II elongation factor ELL2	2	2		7709.66	8323.32
	O00479	HMGN4_HUMAN	HMGN4	HMGN4	High mobility group nucleosome-binding domain-containing protein 4	2	2	102238	171935	274231
	O00483	NDUA4_HUMAN	NDUFA4	NDUFA4	Cytochrome c oxidase subunit NDUFA4	4	4	670759	635742	735607
	O00487	PSDE_HUMAN	PSMD14	PSMD14	26S proteasome non-ATPase regulatory subunit 14	11	11	309203	330422	470468
	O00488	ZN593_HUMAN	ZNF593	ZNF593	Zinc finger protein 593	5	5	179163	161576	204096
	O00499	BIN1_HUMAN	BIN1	BIN1	Myc box-dependent-interacting protein 1	24	22	271063	261714	349772
	O00499-2;O00499-6	BIN1_HUMAN	BIN1	BIN1	Isoform IIB of Myc box-dependent-interacting protein 1	1	1	44147.3	75938.2	92582.6
	O00505	IMA4_HUMAN	KPNA3	KPNA3	Importin subunit alpha-4	7	7	419919	421152	419260
	O00506	STK25_HUMAN	STK25	STK25	Serine/threonine-protein kinase 25	4	4	23363.5	23009.3	21057.4
	O00507	USP9Y_HUMAN	USP9Y	USP9Y	Ubiquitin carboxyl-terminal hydrolase 9Y	6	6	18184	16302.4	17636.3
	O00512	BCL9_HUMAN	BCL9	BCL9	B-cell CLL/lymphoma 9 protein	18	18	59147.5	54227.8	55300.2
	O00534	VMA5A_HUMAN	VWA5A	VWA5A	von Willebrand factor A domain-containing protein 5A	11	11	44051.3	47308.9	46708.3
	O00541;O00541-2	PESC_HUMAN	PES1	PES1	Pescadillo homolog	16	16	197029	212205	209478
	O00559;O00559-2	RCAS1_HUMAN	EBAG9	EBAG9	Receptor-binding cancer antigen expressed on SiSo cells	1	1		6315.48	7325.39
	O00560-2	SDCB1_HUMAN	SDCBP	SDCBP	Isoform 2 of Syntenin-1	1	1	41629.2	43014.5	45638.5
	O00560;O00560-3	SDCB1_HUMAN	SDCBP	SDCBP	Syntenin-1	6	6	235572	247655	205488
	O00562;O00562-2	PITM1_HUMAN	PITPNM1	PITPNM1	Membrane-associated phosphatidylinositol transfer protein 1	11	11	29334.4	27480.1	31664.3
	O00566	MPP10_HUMAN	MPHOSPH10	MPHOSPH10	U3 small nucleolar ribonucleoprotein protein MPP10	16	16	99735.2	123608	119680
	O00567	NOP56_HUMAN	NOP56	NOP56	Nucleolar protein 56	27	27	274235	305754	286002
	O00570	SOX1_HUMAN	SOX1	SOX1	Transcription factor SOX-1	1	1		13378.9
Yes	O00571	DDX3X_HUMAN	DDX3X	DDX3X	ATP-dependent RNA helicase DDX3X	31	10	773339	811245	827555
	O00584	RNT2_HUMAN	RNASET2	RNASET2	Ribonuclease T2	6	6	24347.1	20776.4	28964.8
Yes	O00592;O00592-2	PODXL_HUMAN	PODXL	PODXL	Podocalyxin	11	11	662673	625977	782289
	O00622	CCN1_HUMAN	CCN1	CCN1	CCN family member 1	8	8	49854.2	55861.2	61783.8
	O00623	PEX12_HUMAN	PEX12	PEX12	Peroxisome assembly protein 12	3	3	36440.7	30922.2	23343
	O00625	PIR_HUMAN	PIR	PIR	Pirin	7	7	90684.4	82044.1	92635.5
	O00628;O00628-2	PEX7_HUMAN	PEX7	PEX7	Peroxisomal targeting signal 2 receptor	2	2	12442.3	9079.84	7311.12
	O00629	IMA3_HUMAN	KPNA4	KPNA4	Importin subunit alpha-3	16	9	368596	425844	435880
	O00635	TRI38_HUMAN	TRIM38	TRIM38	E3 ubiquitin-protein ligase TRIM38	1	1	7731.62	8984.77	9010.32
	O00716;O00716-2	E2F3_HUMAN	E2F3	E2F3	Transcription factor E2F3	4	3	81571.3	65023.2	82548.6
	O00743	PPP6_HUMAN	PPP6C	PPP6C	Serine/threonine-protein phosphatase 6 catalytic subunit	12	12	219266	220315	226108
	O00748;O00748-4	EST2_HUMAN	CES2	CES2	Cocaine esterase	1	1	3235.38		2152.44
	O00750	P3C2B_HUMAN	PIK3C2B	PIK3C2B	Phosphatidylinositol 4-phosphate 3-kinase C2 domain-containing subunit beta	15	15	30099.5	27882	29260.3
	O00754	MA2B1_HUMAN	MAN2B1	MAN2B1	Lysosomal alpha-mannosidase	24	24	464095	439719	482511
	O00762;cRAP-O00762	UBE2C_HUMAN;cRAP-UBE2C_HUMAN	UBE2C;cRAP-UBE2C	UBE2C	Ubiquitin-conjugating enzyme E2 C	7	0	197706	207825	220336
	O00764	PDXK_HUMAN	PDXK	PDXK	Pyridoxal kinase	7	7	111119	127565	156429
	O00767	SCD_HUMAN	SCD	SCD	Stearoyl-CoA desaturase	5	5	325827	247185	247935
	O14492;O14492-2	SH2B2_HUMAN	SH2B2	SH2B2	SH2B adapter protein 2	1	1		4033.1
	O14494	PLPP1_HUMAN	PLPP1	PLPP1	Phospholipid phosphatase 1	1	1	13176.1	16163.6	13163.8
	O14495	PLPP3_HUMAN	PLPP3	PLPP3	Phospholipid phosphatase 3	2	2	22225.1	19420.5	20950.3
	O14497	ARI1A_HUMAN	ARID1A	ARID1A	AT-rich interactive domain-containing protein 1A	39	37	178013	173144	175271
	O14498	ISLR_HUMAN	ISLR	ISLR	Immunoglobulin superfamily containing leucine-rich repeat protein	3	3	35053.8	32331.9	28492.9
	O14519;O14519-2	CDKA1_HUMAN	CDK2AP1	CDK2AP1	Cyclin-dependent kinase 2-associated protein 1	3	2	94713.9	83930.1	119863
	O14521;O14521-2;O14521-4	DHSD_HUMAN	SDHD	SDHD	Succinate dehydrogenase [ubiquinone] cytochrome b small subunit, mitochondrial	1	1	18663	29227.3	20209.9
	O14523;O14523-2	C2C2L_HUMAN	C2CD2L	C2CD2L	Phospholipid transfer protein C2CD2L	2	2	4637.77	4945.45	4061.52
	O14524	NEMP1_HUMAN	NEMP1	NEMP1	Nuclear envelope integral membrane protein 1	7	7	55386	43514.8	50092.9
	O14530	TXND9_HUMAN	TXNDC9	TXNDC9	Thioredoxin domain-containing protein 9	10	10	217959	229555	253021
	O14530-2	TXND9_HUMAN	TXNDC9	TXNDC9	Isoform 2 of Thioredoxin domain-containing protein 9	1	1	25541		17912.4
	O14531	DPYL4_HUMAN	DPYSL4	DPYSL4	Dihydropyrimidinase-related protein 4	24	24	154432	169899	191834
	O14544	SOCS6_HUMAN	SOCS6	SOCS6	Suppressor of cytokine signaling 6	2	2	22817.7	18321.9	18621.6
	O14545	TRAD1_HUMAN	TRAFD1	TRAFD1	TRAF-type zinc finger domain-containing protein 1	11	11	78592.1	84815.1	79966.9
	O14548	CO72L_HUMAN	COX7A2L	COX7A2L	Cytochrome c oxidase subunit 7A2-like, mitochondrial	5	5	128680	118762	136564
	O14558	HSPB6_HUMAN	HSPB6	HSPB6	Heat shock protein beta-6	3	3	13983.4	15527.3	13109.2
	O14561	ACPM_HUMAN	NDUFAB1	NDUFAB1	Acyl carrier protein, mitochondrial	3	3	242561	331322	360568
	O14562	UBFD1_HUMAN	UBFD1	UBFD1	Ubiquitin domain-containing protein UBFD1	5	5	174100	199238	230736
	O14569	C56D2_HUMAN	CYB561D2	CYB561D2	Transmembrane reductase CYB561D2	1	1	8802.93	8791.91	8121.28
	O14576;O14576-2;O14576-3;O14576-4;O14576-5	DC1I1_HUMAN	DYNC1I1	DYNC1I1	Cytoplasmic dynein 1 intermediate chain 1	5	5	23629.2	20033.8	23952.1
	O14578-4	CTRO_HUMAN	CIT	CIT	Isoform 4 of Citron Rho-interacting kinase	57	56	47469.9	50755	52001.4
	O14579	COPE_HUMAN	COPE	COPE	Coatomer subunit epsilon	17	17	310662	330194	339025
	O14593;O14593-2;O14593-3	RFXK_HUMAN	RFXANK	RFXANK	DNA-binding protein RFXANK	2	2	17529.8	21388.4	17548.1
	O14595	CTDS2_HUMAN	CTDSP2	CTDSP2	Carboxy-terminal domain RNA polymerase II polypeptide A small phosphatase 2	3	3	8494.9	9061.66	4689.76
	O14602	IF1AY_HUMAN	EIF1AY	EIF1AY	Eukaryotic translation initiation factor 1A, Y-chromosomal	5	1	1.64594e+06	1.45421e+06	1.62775e+06
	O14613	BORG1_HUMAN	CDC42EP2	CDC42EP2	Cdc42 effector protein 2	4	4	21198.1	22303.6	23662.3
	O14617-5	AP3D1_HUMAN	AP3D1	AP3D1	Isoform 5 of AP-3 complex subunit delta-1	34	34	341960	355533	350854
	O14618	CCS_HUMAN	CCS	CCS	Copper chaperone for superoxide dismutase	8	8	83678.9	97167.8	133043
	O14628;O14628-4;O14628-5;O14628-6;O14628-7	ZN195_HUMAN	ZNF195	ZNF195	Zinc finger protein 195	9	9	12183.1	11531.9	12257.6
	O14639-6	ABLM1_HUMAN	ABLIM1	ABLIM1	Isoform 6 of Actin-binding LIM protein 1	14	14	103979	96634.8	102236
	O14640;O14640-2;P54792;P54792-2	DVL1_HUMAN;DVLP1_HUMAN	DVL1;DVL1P1	DVL1	Segment polarity protein dishevelled homolog DVL-1	3	0	10101.7	7097.33	8692.25
	O14641	DVL2_HUMAN	DVL2	DVL2	Segment polarity protein dishevelled homolog DVL-2	19	14	72990.9	100635	98699.3
	O14645;O14645-2	IDLC_HUMAN	DNALI1	DNALI1	Axonemal dynein light intermediate polypeptide 1	2	2	14674.4	13157.5	23241.7
	O14647	CHD2_HUMAN	CHD2	CHD2	Chromodomain-helicase-DNA-binding protein 2	19	19	37282.8	38466	32968.3
	O14653;O14653-2	GOSR2_HUMAN	GOSR2	GOSR2	Golgi SNAP receptor complex member 2	5	5	241130	253123	218859
	O14654	IRS4_HUMAN	IRS4	IRS4	Insulin receptor substrate 4	2	2	5031.15	5805.57	5306.79
	O14656	TOR1A_HUMAN	TOR1A	TOR1A	Torsin-1A	9	9	109818	108177	103486
	O14657	TOR1B_HUMAN	TOR1B	TOR1B	Torsin-1B	7	7	41792.3	39070.2	35986.6
	O14662-2	STX16_HUMAN	STX16	STX16	Isoform A of Syntaxin-16	7	1	43011.5	40272	38877.3
	O14672	ADA10_HUMAN	ADAM10	ADAM10	Disintegrin and metalloproteinase domain-containing protein 10	20	20	124315	122184	112272
	O14678	ABCD4_HUMAN	ABCD4	ABCD4	Lysosomal cobalamin transporter ABCD4	5	5	20250	17840.2	20065.3
	O14681	EI24_HUMAN	EI24	EI24	Etoposide-induced protein 2.4 homolog	4	4	53808.5	49540.9	62383.7
	O14682	ENC1_HUMAN	ENC1	ENC1	Ectoderm-neural cortex protein 1	17	17	23671.2	24667.2	26511.9
	O14683	P5I11_HUMAN	TP53I11	TP53I11	Tumor protein p53-inducible protein 11	3	3	170161	175135	142265
	O14684	PTGES_HUMAN	PTGES	PTGES	Prostaglandin E synthase	2	2	18627.5	12023.9	20351.6
	O14686;O14686-3	KMT2D_HUMAN	KMT2D	KMT2D	Histone-lysine N-methyltransferase 2D	32	32	30887.1	30800.1	25390.6
	O14709	ZN197_HUMAN	ZNF197	ZNF197	Zinc finger protein 197	1	1	3245.56
	O14713	ITBP1_HUMAN	ITGB1BP1	ITGB1BP1	Integrin beta-1-binding protein 1	4	4	22207.9	23935.3	23346.8
	O14715	RGPD8_HUMAN	RGPD8	RGPD8	RANBP2-like and GRIP domain-containing protein 8	12	1	62839.5	56753.9	61989.9
	O14717;O14717-2;O14717-3	TRDMT_HUMAN	TRDMT1	TRDMT1	tRNA (cytosine(38)-C(5))-methyltransferase	3	3	17572.8	16425.8	16091.7
	O14727;O14727-4;O14727-5	APAF_HUMAN	APAF1	APAF1	Apoptotic protease-activating factor 1	22	22	66049.2	69111.2	72499.6
	O14730;O14730-2	RIOK3_HUMAN	RIOK3	RIOK3	Serine/threonine-protein kinase RIO3	3	3	29508.5	30408.6	35833.9
	O14732;O14732-2	IMPA2_HUMAN	IMPA2	IMPA2	Inositol monophosphatase 2	4	4	25117.8	25372	26591.3
	O14733;O14733-3;O14733-4	MP2K7_HUMAN	MAP2K7	MAP2K7	Dual specificity mitogen-activated protein kinase kinase 7	8	8	61976.9	61628.1	57749.6
	O14734	ACOT8_HUMAN	ACOT8	ACOT8	Acyl-coenzyme A thioesterase 8	4	4	31962.5	28947	25907.4
	O14735;O14735-3	CDIPT_HUMAN	CDIPT	CDIPT	CDP-diacylglycerol--inositol 3-phosphatidyltransferase	2	2	7129.35	8967.82	7977.02
	O14737	PDCD5_HUMAN	PDCD5	PDCD5	Programmed cell death protein 5	9	9	1.00423e+06	1.09755e+06	1.44962e+06
	O14744	ANM5_HUMAN	PRMT5	PRMT5	Protein arginine N-methyltransferase 5	18	18	270342	283029	345323
	O14745	NHRF1_HUMAN	NHERF1	NHERF1	Na(+)/H(+) exchange regulatory cofactor NHE-RF1	18	18	833728	761700	895296
	O14757	CHK1_HUMAN	CHEK1	CHEK1	Serine/threonine-protein kinase Chk1	17	17	110642	105800	104028
	O14763;O14763-2	TR10B_HUMAN	TNFRSF10B	TNFRSF10B	Tumor necrosis factor receptor superfamily member 10B	5	5	35934.8	42660.9	53210.5
	O14772;O14772-2	FPGT_HUMAN	FPGT	FPGT	Fucose-1-phosphate guanylyltransferase	1	1	15964.7	14237.9	15214.8
	O14773	TPP1_HUMAN	TPP1	TPP1	Tripeptidyl-peptidase 1	7	7	125048	119860	110437
	O14776;O14776-2	TCRG1_HUMAN	TCERG1	TCERG1	Transcription elongation regulator 1	40	39	231871	239283	245317
	O14777	NDC80_HUMAN	NDC80	NDC80	Kinetochore protein NDC80 homolog	29	29	124785	135496	134104
	O14782	KIF3C_HUMAN	KIF3C	KIF3C	Kinesin-like protein KIF3C	2	2	23912.7	23631.3
	O14787	TNPO2_HUMAN	TNPO2	TNPO2	Transportin-2	14	14	59356.5	65041.7	60498.8
	O14798	TR10C_HUMAN	TNFRSF10C	TNFRSF10C	Tumor necrosis factor receptor superfamily member 10C	1	1	15897.1		11480.6
	O14802	RPC1_HUMAN	POLR3A	POLR3A	DNA-directed RNA polymerase III subunit RPC1	41	41	110152	110067	108467
	O14807	RASM_HUMAN	MRAS	MRAS	Ras-related protein M-Ras	6	6	55894.7	54409.5	57741.5
	O14818	PSA7_HUMAN	PSMA7	PSMA7	Proteasome subunit alpha type-7	11	6	907128	1.05572e+06	1.29579e+06
	O14818-2	PSA7_HUMAN	PSMA7	PSMA7	Isoform 2 of Proteasome subunit alpha type-7	1	1	12480.7	22780.9	39570.5
	O14828	SCAM3_HUMAN	SCAMP3	SCAMP3	Secretory carrier-associated membrane protein 3	6	6	220196	215889	188137
	O14832;O14832-2	PAHX_HUMAN	PHYH	PHYH	Phytanoyl-CoA dioxygenase, peroxisomal	3	3	15830.6	13203.6	12679
	O14841	OPLA_HUMAN	OPLAH	OPLAH	5-oxoprolinase	14	14	29242.4	29707.2	27666.4
	O14867	BACH1_HUMAN	BACH1	BACH1	Transcription regulator protein BACH1	14	14	32434.1	33060.8	30658.5
	O14874;O14874-2;O14874-3	BCKD_HUMAN	BCKDK	BCKDK	Branched-chain alpha-ketoacid dehydrogenase kinase	6	6	66476.1	60278.6	66123.6
	O14880	MGST3_HUMAN	MGST3	MGST3	Glutathione S-transferase 3, mitochondrial	3	3	124373	122857	89862.2
	O14893;O14893-2;O14893-5;O14893-3	GEMI2_HUMAN	GEMIN2	GEMIN2	Gem-associated protein 2	7	7	141066	167465	164357
	O14907	TX1B3_HUMAN	TAX1BP3	TAX1BP3	Tax1-binding protein 3	1	1	647903	468351	557017
	O14908	GIPC1_HUMAN	GIPC1	GIPC1	PDZ domain-containing protein GIPC1	10	9	89880.8	100700	99382.3
	O14910	LIN7A_HUMAN	LIN7A	LIN7A	Protein lin-7 homolog A	1	1	42783.7	44583.7	33193.2
	O14917	PCD17_HUMAN	PCDH17	PCDH17	Protocadherin-17	9	9	29290.1	24959.3	24766.4
	O14920	IKKB_HUMAN	IKBKB	IKBKB	Inhibitor of nuclear factor kappa-B kinase subunit beta	8	8	22551.5	19319.1	23904
	O14924	RGS12_HUMAN	RGS12	RGS12	Regulator of G-protein signaling 12	11	11	17236.3	17538.9	17250.7
	O14925;Q5SRD1;Q5SRD1-2	TI23B_HUMAN;TIM23_HUMAN	TIMM23;TIMM23B	TIMM23	Mitochondrial import inner membrane translocase subunit Tim23	1	0	195556	186653	132881
	O14933	UB2L6_HUMAN	UBE2L6	UBE2L6	Ubiquitin/ISG15-conjugating enzyme E2 L6	4	4	62523.7	55310.1	64373.3
	O14936	CSKP_HUMAN	CASK	CASK	Peripheral plasma membrane protein CASK	27	27	283328	278678	279970
	O14939;O14939-4	PLD2_HUMAN	PLD2	PLD2	Phospholipase D2	8	8	52394.6	47763.9	43585.9
	O14949	QCR8_HUMAN	UQCRQ	UQCRQ	Cytochrome b-c1 complex subunit 8	4	4	137214	160352	218442
	O14950;P19105	ML12A_HUMAN;ML12B_HUMAN	MYL12A;MYL12B	MYL12A	Myosin regulatory light chain 12B	5	0	1.07285e+06	1.08611e+06	1.58542e+06
	O14957	QCR10_HUMAN	UQCR11	UQCR11	Cytochrome b-c1 complex subunit 10	1	1	116532	93170.2	124042
	O14964	HGS_HUMAN	HGS	HGS	Hepatocyte growth factor-regulated tyrosine kinase substrate	15	15	117611	130602	132651
	O14965	AURKA_HUMAN	AURKA	AURKA	Aurora kinase A	11	11	98842.1	102739	89298.2
	O14967	CLGN_HUMAN	CLGN	CLGN	Calmegin	9	9	33622.7	38051.4	32624.1
	O14972	VP26C_HUMAN	VPS26C	VPS26C	Vacuolar protein sorting-associated protein 26C	8	8	39586.4	33513	32467.6
	O14974	MYPT1_HUMAN	PPP1R12A	PPP1R12A	Protein phosphatase 1 regulatory subunit 12A	37	35	233813	245758	287254
	O14976	GAK_HUMAN	GAK	GAK	Cyclin-G-associated kinase	26	26	105894	110948	115666
	O14979	HNRDL_HUMAN	HNRNPDL	HNRNPDL	Heterogeneous nuclear ribonucleoprotein D-like	12	11	4.39701e+06	4.35809e+06	5.00475e+06
	O14980	XPO1_HUMAN	XPO1	XPO1	Exportin-1	48	48	477657	547442	570979
	O14981	BTAF1_HUMAN	BTAF1	BTAF1	TATA-binding protein-associated factor 172	41	41	73795	76887.5	79593.6
	O15013;O15013-4;O15013-5;O15013-6	ARHGA_HUMAN	ARHGEF10	ARHGEF10	Rho guanine nucleotide exchange factor 10	21	20	52877	56050.7	49139.6
	O15014	ZN609_HUMAN	ZNF609	ZNF609	Zinc finger protein 609	15	15	126381	107559	127742
	O15015;O15015-1	ZN646_HUMAN	ZNF646	ZNF646	Zinc finger protein 646	10	10	18075.2	17641.7	15900.1
	O15018	PDZD2_HUMAN	PDZD2	PDZD2	PDZ domain-containing protein 2	4	4	11903.1	10563.1	10462.5
	O15020;O15020-2	SPTN2_HUMAN	SPTBN2	SPTBN2	Spectrin beta chain, non-erythrocytic 2	59	59	188547	191998	182619
	O15027;O15027-2;O15027-3;O15027-4;O15027-5	SC16A_HUMAN	SEC16A	SEC16A	Protein transport protein Sec16A	38	38	127081	123945	128989
	O15031	PLXB2_HUMAN	PLXNB2	PLXNB2	Plexin-B2	33	31	67510.4	68751.8	68100.6
	O15037	KHNYN_HUMAN	KHNYN	KHNYN	Protein KHNYN	11	11	91204.8	82876	72389.2
	O15040;O15040-2	TCPR2_HUMAN	TECPR2	TECPR2	Tectonin beta-propeller repeat-containing protein 2	12	12	46295.5	43057.4	46683.4
	O15042;O15042-2	SR140_HUMAN	U2SURP	U2SURP	U2 snRNP-associated SURP motif-containing protein	29	29	265556	284557	269937
	O15047	SET1A_HUMAN	SETD1A	SETD1A	Histone-lysine N-methyltransferase SETD1A	22	21	52132.3	48215.3	44905.8
	O15049	N4BP3_HUMAN	N4BP3	N4BP3	NEDD4-binding protein 3	4	4	12344	8775.69	6988.11
	O15054;O15054-1	KDM6B_HUMAN	KDM6B	KDM6B	Lysine-specific demethylase 6B	3	3	9580.24	7365.74	7828.99
	O15056;O15056-2	SYNJ2_HUMAN	SYNJ2	SYNJ2	Synaptojanin-2	6	6	32446.7	37638.9	33280.7
	O15060	ZBT39_HUMAN	ZBTB39	ZBTB39	Zinc finger and BTB domain-containing protein 39	7	7	16456.3	17656.9	20675.2
	O15061	SYNEM_HUMAN	SYNM	SYNM	Synemin	15	15	83257.4	88749.6	76756.8
	O15062	ZBTB5_HUMAN	ZBTB5	ZBTB5	Zinc finger and BTB domain-containing protein 5	5	5	9747.32	7277.71	5399.24
	O15063	GRRE1_HUMAN	GARRE1	GARRE1	Granule associated Rac and RHOG effector protein 1	6	6	18762.2	24272.8	20917.7
	O15066	KIF3B_HUMAN	KIF3B	KIF3B	Kinesin-like protein KIF3B	15	11	29044.3	32763.1	29454.3
	O15067	PUR4_HUMAN	PFAS	PFAS	Phosphoribosylformylglycinamidine synthase	35	35	512268	578244	577515
	O15069	NACAD_HUMAN	NACAD	NACAD	NAC-alpha domain-containing protein 1	7	7	17696.9	18404.8	17376.2
	O15075	DCLK1_HUMAN	DCLK1	DCLK1	Serine/threonine-protein kinase DCLK1	11	9	46340.1	45738.5	54475.3
	O15078	CE290_HUMAN	CEP290	CEP290	Centrosomal protein of 290 kDa	22	22	94948.4	90451	92481.4
	O15084;O15084-1;O15084-4	ANR28_HUMAN	ANKRD28	ANKRD28	Serine/threonine-protein phosphatase 6 regulatory ankyrin repeat subunit A	11	10	61465.6	58705	55355.6
	O15085-2;O15085	ARHGB_HUMAN	ARHGEF11	ARHGEF11	Rho guanine nucleotide exchange factor 11	18	18	34916.9	38038.1	38665.9
	O15091	MRPP3_HUMAN	PRORP	PRORP	Mitochondrial ribonuclease P catalytic subunit	14	14	56013.1	55723.2	49746.7
	O15111	IKKA_HUMAN	CHUK	CHUK	Inhibitor of nuclear factor kappa-B kinase subunit alpha	10	10	55478.5	62779.8	50778.2
	O15116	LSM1_HUMAN	LSM1	LSM1	U6 snRNA-associated Sm-like protein LSm1	5	5	198025	188051	206219
	O15118	NPC1_HUMAN	NPC1	NPC1	NPC intracellular cholesterol transporter 1	7	7	74437.5	72679.8	71134.6
	O15119;O15119-2;O15119-3	TBX3_HUMAN	TBX3	TBX3	T-box transcription factor TBX3	3	2	14118.5	12235.2	14243.3
	O15120	PLCB_HUMAN	AGPAT2	AGPAT2	1-acyl-sn-glycerol-3-phosphate acyltransferase beta	2	2	14951.2	16753.1	13718.2
	O15121	DEGS1_HUMAN	DEGS1	DEGS1	Sphingolipid delta(4)-desaturase DES1	3	3	28368.5	28205.6	22872
	O15126	SCAM1_HUMAN	SCAMP1	SCAMP1	Secretory carrier-associated membrane protein 1	7	7	88415.4	91138.2	70355.9
	O15127	SCAM2_HUMAN	SCAMP2	SCAMP2	Secretory carrier-associated membrane protein 2	2	2	69471.2	69079.7	67944.5
	O15131	IMA6_HUMAN	KPNA5	KPNA5	Importin subunit alpha-6	2	2	4820.21	5509.71	5660.29
	O15143	ARC1B_HUMAN	ARPC1B	ARPC1B	Actin-related protein 2/3 complex subunit 1B	1	1	157306	166923	163441
	O15144	ARPC2_HUMAN	ARPC2	ARPC2	Actin-related protein 2/3 complex subunit 2	15	15	474612	491591	557292
	O15145	ARPC3_HUMAN	ARPC3	ARPC3	Actin-related protein 2/3 complex subunit 3	10	10	404749	485310	482368
	O15151	MDM4_HUMAN	MDM4	MDM4	Protein Mdm4	4	4	14077.5	14405.3	10069.9
	O15155	BET1_HUMAN	BET1	BET1	BET1 homolog	2	2	115913	114099	122842
	O15160	RPAC1_HUMAN	POLR1C	POLR1C	DNA-directed RNA polymerases I and III subunit RPAC1	10	10	159277	163708	172294
	O15162;O15162-2	PLS1_HUMAN	PLSCR1	PLSCR1	Phospholipid scramblase 1	3	3	50900.4	60236.3	53098.9
	O15164;O15164-2	TIF1A_HUMAN	TRIM24	TRIM24	Transcription intermediary factor 1-alpha	24	23	80571.6	71955.3	66602.7
	O15169;O15169-2	AXIN1_HUMAN	AXIN1	AXIN1	Axin-1	3	3	22514.6	12322.9	18070.9
	O15173;O15173-2	PGRC2_HUMAN	PGRMC2	PGRMC2	Membrane-associated progesterone receptor component 2	5	5	512053	626298	746795
	O15178;O15178-2	TBXT_HUMAN	TBXT	TBXT	T-box transcription factor T	2	2	8864.16	7969.98	8128.64
	O15182	CETN3_HUMAN	CETN3	CETN3	Centrin-3	5	5	40438.5	78203.1	90540.1
	O15194;O15194-2	CTDSL_HUMAN	CTDSPL	CTDSPL	CTD small phosphatase-like protein	2	2	15552.8	16272.4	15968.6
	O15211	RGL2_HUMAN	RGL2	RGL2	Ral guanine nucleotide dissociation stimulator-like 2	3	3	24143.3	20862.2	19158.7
	O15212	PFD6_HUMAN	PFDN6	PFDN6	Prefoldin subunit 6	10	10	1.04578e+06	1.02118e+06	1.40868e+06
	O15213	WDR46_HUMAN	WDR46	WDR46	WD repeat-containing protein 46	13	13	58938	64475	55293.1
	O15217	GSTA4_HUMAN	GSTA4	GSTA4	Glutathione S-transferase A4	5	5	60389.2	59369.2	69576.4
	O15228	GNPAT_HUMAN	GNPAT	GNPAT	Dihydroxyacetone phosphate acyltransferase	11	11	49820.2	46246.7	33322.1
	O15230	LAMA5_HUMAN	LAMA5	LAMA5	Laminin subunit alpha-5	21	21	107897	101970	88809
	O15231-3	ZN185_HUMAN	ZNF185	ZNF185	Isoform 3 of Zinc finger protein 185	18	18	126346	112682	136415
	O15231-8	ZN185_HUMAN	ZNF185	ZNF185	Isoform 8 of Zinc finger protein 185	1	1	29704.9	24484.5	25673
	O15232-2	MATN3_HUMAN	MATN3	MATN3	Isoform 2 of Matrilin-3	1	1	8934.58	7744.74	4591.58
	O15234	CASC3_HUMAN	CASC3	CASC3	Protein CASC3	14	14	82809.4	81906	105187
	O15235	RT12_HUMAN	MRPS12	MRPS12	Small ribosomal subunit protein uS12m	3	3	67352.1	79354.3	61992.4
	O15240	VGF_HUMAN	VGF	VGF	Neurosecretory protein VGF	8	8	16446.4	13760.1	14512.2
	O15243	OBRG_HUMAN	LEPROT	LEPROT	Leptin receptor gene-related protein	1	1	9009.25	8700.56	4115.65
	O15254	ACOX3_HUMAN	ACOX3	ACOX3	Peroxisomal acyl-coenzyme A oxidase 3	15	15	47785.1	44283.6	38529.5
	O15258	RER1_HUMAN	RER1	RER1	Protein RER1	8	8	123629	148238	111080
	O15259;O15259-2;O15259-4	NPHP1_HUMAN	NPHP1	NPHP1	Nephrocystin-1	1	1			10302.6
	O15260;O15260-2;O15260-3	SURF4_HUMAN	SURF4	SURF4	Surfeit locus protein 4	3	3	54717.7	53401.7	45574.2
	O15269	SPTC1_HUMAN	SPTLC1	SPTLC1	Serine palmitoyltransferase 1	11	11	137388	135416	110336
	O15270	SPTC2_HUMAN	SPTLC2	SPTLC2	Serine palmitoyltransferase 2	16	16	84938.3	76258.1	64702.1
	O15287	FANCG_HUMAN	FANCG	FANCG	Fanconi anemia group G protein	14	14	37365.4	36184	40299.8
	O15294	OGT1_HUMAN	OGT	OGT	UDP-N-acetylglucosamine--peptide N-acetylglucosaminyltransferase 110 kDa subunit	30	30	148067	143973	144494
	O15304	SIVA_HUMAN	SIVA1	SIVA1	Apoptosis regulatory protein Siva	3	3	39759.6	35835.4	36468.1
	O15305	PMM2_HUMAN	PMM2	PMM2	Phosphomannomutase 2	9	8	139867	130095	144387
	O15315-1;O15315;O15315-2;O15315-4;O15315-5	RA51B_HUMAN	RAD51B	RAD51B	DNA repair protein RAD51 homolog 2	1	1	5667.3	4556.07	4565.04
	O15318	RPC7_HUMAN	POLR3G	POLR3G	DNA-directed RNA polymerase III subunit RPC7	4	4	52767	44046.1	58938.7
	O15344	TRI18_HUMAN	MID1	MID1	E3 ubiquitin-protein ligase Midline-1	14	13	429276	392514	426743
	O15347	HMGB3_HUMAN	HMGB3	HMGB3	High mobility group protein B3	7	7	2.43697e+06	2.08661e+06	2.56501e+06
	O15355	PPM1G_HUMAN	PPM1G	PPM1G	Protein phosphatase 1G	21	21	514614	572715	718340
	O15357	SHIP2_HUMAN	INPPL1	INPPL1	Phosphatidylinositol 3,4,5-trisphosphate 5-phosphatase 2	35	33	82937.7	83096.6	91727.7
	O15360	FANCA_HUMAN	FANCA	FANCA	Fanconi anemia group A protein	8	8	17495.5	16047.5	15908.6
	O15370	SOX12_HUMAN	SOX12	SOX12	Transcription factor SOX-12	1	1		24399.5	32565.6
	O15371;O15371-2;O15371-3	EIF3D_HUMAN	EIF3D	EIF3D	Eukaryotic translation initiation factor 3 subunit D	19	19	439372	462117	495358
	O15372	EIF3H_HUMAN	EIF3H	EIF3H	Eukaryotic translation initiation factor 3 subunit H	19	19	353585	398630	416776
	O15379	HDAC3_HUMAN	HDAC3	HDAC3	Histone deacetylase 3	10	10	29927.6	31026.6	28132.1
	O15381	NVL_HUMAN	NVL	NVL	Nuclear valosin-containing protein-like	25	25	54450.3	55715.8	51952.3
	O15392	BIRC5_HUMAN	BIRC5	BIRC5	Baculoviral IAP repeat-containing protein 5	5	5	63243.4	66060.6	62240.1
	O15397	IPO8_HUMAN	IPO8	IPO8	Importin-8	21	21	93703.3	87584.1	93225.9
	O15400;O15400-2	STX7_HUMAN	STX7	STX7	Syntaxin-7	8	8	1.22081e+06	1.15669e+06	1.33271e+06
	O15409;O15409-4;O15409-9	FOXP2_HUMAN	FOXP2	FOXP2	Forkhead box protein P2	1	1	8270.58		6375.92
	O15417	TNC18_HUMAN	TNRC18	TNRC18	Trinucleotide repeat-containing gene 18 protein	7	7	30348.2	26395.2	26660.4
	O15427	MOT4_HUMAN	SLC16A3	SLC16A3	Monocarboxylate transporter 4	4	4	150387	128739	120725
	O15431	COPT1_HUMAN	SLC31A1	SLC31A1	High affinity copper uptake protein 1	1	1	48341.9	46292.6	38937.2
	O15439;O15439-2;O15439-3;O15439-4	MRP4_HUMAN	ABCC4	ABCC4	ATP-binding cassette sub-family C member 4	3	3	19629.5	17644.9	16763.3
	O15440;O15440-5	MRP5_HUMAN	ABCC5	ABCC5	ATP-binding cassette sub-family C member 5	6	6	15096.4	19727.2	19729.3
	O15446;O15446-2	RPA34_HUMAN	POLR1G	POLR1G	DNA-directed RNA polymerase I subunit RPA34	8	8	118439	116655	142239
	O15460;O15460-2	P4HA2_HUMAN	P4HA2	P4HA2	Prolyl 4-hydroxylase subunit alpha-2	13	13	199654	195557	194409
	O15484	CAN5_HUMAN	CAPN5	CAPN5	Calpain-5	14	14	32924.4	32840.8	28720.2
	O15488;O15488-2;O15488-3;O15488-4;O15488-6	GLYG2_HUMAN	GYG2	GYG2	Glycogenin-2	3	3	121496	120568	138193
	O15498	YKT6_HUMAN	YKT6	YKT6	Synaptobrevin homolog YKT6	12	12	178310	181870	182817
	O15504	NUP42_HUMAN	NUP42	NUP42	Nucleoporin NUP42	6	6	35500	32326.1	31320.3
	O15511	ARPC5_HUMAN	ARPC5	ARPC5	Actin-related protein 2/3 complex subunit 5	6	6	201438	254891	316000
	O15514	RPB4_HUMAN	POLR2D	POLR2D	DNA-directed RNA polymerase II subunit RPB4	5	5	214118	188518	216382
	O15523	DDX3Y_HUMAN	DDX3Y	DDX3Y	ATP-dependent RNA helicase DDX3Y	8	8	56402.8	52670.1	60268.7
	O15525	MAFG_HUMAN	MAFG	MAFG	Transcription factor MafG	3	2	19428.2	18547.8	22549.7
	O15530;O15530-3	PDPK1_HUMAN	PDPK1	PDPK1	3-phosphoinositide-dependent protein kinase 1	14	4	45377.1	44940.1	42765.1
	O15534	PER1_HUMAN	PER1	PER1	Period circadian protein homolog 1	4	4	276211	267442	258818
	O15540;O15540-2	FABP7_HUMAN	FABP7	FABP7	Fatty acid-binding protein, brain	6	6	154260	173773	193419
	O15541	R113A_HUMAN	RNF113A	RNF113A	E3 ubiquitin-protein ligase RNF113A	4	3	49537.7	44538.6	51092
	O15550	KDM6A_HUMAN	KDM6A	KDM6A	Lysine-specific demethylase 6A	14	7	38547.6	35902.9	29840.1
	O43143	DHX15_HUMAN	DHX15	DHX15	ATP-dependent RNA helicase DHX15	36	36	485950	520446	570622
	O43148-2	MCES_HUMAN	RNMT	RNMT	Isoform 2 of mRNA cap guanine-N(7) methyltransferase	15	15	150534	152316	165028
	O43149	ZZEF1_HUMAN	ZZEF1	ZZEF1	Zinc finger ZZ-type and EF-hand domain-containing protein 1	30	30	275748	262868	259968
	O43150-2	ASAP2_HUMAN	ASAP2	ASAP2	Isoform 2 of Arf-GAP with SH3 domain, ANK repeat and PH domain-containing protein 2	18	16	65648.9	65146.4	67136.6
	O43155	FLRT2_HUMAN	FLRT2	FLRT2	Leucine-rich repeat transmembrane protein FLRT2	5	5	17374.1	15000.9	12215.5
	O43156	TTI1_HUMAN	TTI1	TTI1	TELO2-interacting protein 1 homolog	18	18	61162.4	71169.9	67302.6
	O43157;O43157-2	PLXB1_HUMAN	PLXNB1	PLXNB1	Plexin-B1	11	11	20890.5	22135.5	19084
	O43159	RRP8_HUMAN	RRP8	RRP8	Ribosomal RNA-processing protein 8	11	11	47309.3	49694.2	43856.4
	O43164;O43164-2	PJA2_HUMAN	PJA2	PJA2	E3 ubiquitin-protein ligase Praja-2	9	9	51865.7	49439.7	57791.3
	O43166;O43166-2;O43166-3	SI1L1_HUMAN	SIPA1L1	SIPA1L1	Signal-induced proliferation-associated 1-like protein 1	15	15	34730.4	32710.9	30174.3
	O43167;O43167-2	ZBT24_HUMAN	ZBTB24	ZBTB24	Zinc finger and BTB domain-containing protein 24	3	3	13554.1	13491.1	12707.8
	O43169	CYB5B_HUMAN	CYB5B	CYB5B	Cytochrome b5 type B	6	6	1.70181e+06	1.57661e+06	1.68077e+06
	O43172;O43172-2	PRP4_HUMAN	PRPF4	PRPF4	U4/U6 small nuclear ribonucleoprotein Prp4	22	22	186206	172883	188655
	O43175	SERA_HUMAN	PHGDH	PHGDH	D-3-phosphoglycerate dehydrogenase	21	21	1.88292e+06	1.91734e+06	1.98093e+06
	O43181	NDUS4_HUMAN	NDUFS4	NDUFS4	NADH dehydrogenase [ubiquinone] iron-sulfur protein 4, mitochondrial	5	5	73883.3	71898	105296
	O43189-2	PHF1_HUMAN	PHF1	PHF1	Isoform 1 of PHD finger protein 1	2	2	10394.2	9430.33	4029.7
	O43236-7	SEPT4_HUMAN	SEPTIN4	SEPTIN4	Isoform 7 of Septin-4	1	1	12474.9	19360	72605
	O43237	DC1L2_HUMAN	DYNC1LI2	DYNC1LI2	Cytoplasmic dynein 1 light intermediate chain 2	14	14	254059	235812	281345
	O43242	PSMD3_HUMAN	PSMD3	PSMD3	26S proteasome non-ATPase regulatory subunit 3	31	31	481008	489130	573136
	O43248	HXC11_HUMAN	HOXC11	HOXC11	Homeobox protein Hox-C11	3	3	15692.7	13797.7	15092.6
	O43251-6;O43251-8	RFOX2_HUMAN	RBFOX2	RBFOX2	Isoform 6 of RNA binding protein fox-1 homolog 2	9	4	243802	215600	235523
	O43252	PAPS1_HUMAN	PAPSS1	PAPSS1	Bifunctional 3'-phosphoadenosine 5'-phosphosulfate synthase 1	25	24	496331	504632	575668
	O43257	ZNHI1_HUMAN	ZNHIT1	ZNHIT1	Zinc finger HIT domain-containing protein 1	1	1	6767.61	8719.3	8771.18
	O43264	ZW10_HUMAN	ZW10	ZW10	Centromere/kinetochore protein zw10 homolog	32	32	88861.8	97788.6	89366
	O43278;O43278-2	SPIT1_HUMAN	SPINT1	SPINT1	Kunitz-type protease inhibitor 1	2	2			5111.33
	O43281	EFS_HUMAN	EFS	EFS	Embryonal Fyn-associated substrate	8	8	33803.2	34349.1	33730.3
	O43286	B4GT5_HUMAN	B4GALT5	B4GALT5	Beta-1,4-galactosyltransferase 5	4	3	41708.4	40230.1	39561.3
	O43290	SNUT1_HUMAN	SART1	SART1	U4/U6.U5 tri-snRNP-associated protein 1	34	34	232301	251489	282224
	O43291;O43291-2	SPIT2_HUMAN	SPINT2	SPINT2	Kunitz-type protease inhibitor 2	3	3	14521.6	13020.8	17525.1
	O43293	DAPK3_HUMAN	DAPK3	DAPK3	Death-associated protein kinase 3	16	15	92580.5	93116.1	88555.6
	O43294;O43294-2	TGFI1_HUMAN	TGFB1I1	TGFB1I1	Transforming growth factor beta-1-induced transcript 1 protein	9	9	51407.8	51661.8	64269.7
	O43295	SRGP3_HUMAN	SRGAP3	SRGAP3	SLIT-ROBO Rho GTPase-activating protein 3	14	11	38558.2	31038.1	32077.6
	O43296	ZN264_HUMAN	ZNF264	ZNF264	Zinc finger protein 264	2	1		29287.7	25297.6
	O43298	ZBT43_HUMAN	ZBTB43	ZBTB43	Zinc finger and BTB domain-containing protein 43	4	4	50607.1	50296.6	26891.9
	O43299	AP5Z1_HUMAN	AP5Z1	AP5Z1	AP-5 complex subunit zeta-1	9	9	59354.9	49417	47413.1
	O43301	HS12A_HUMAN	HSPA12A	HSPA12A	Heat shock 70 kDa protein 12A	3	3	8037.92	9213.54
	O43303;O43303-2	CP110_HUMAN	CCP110	CCP110	Centriolar coiled-coil protein of 110 kDa	7	7	14070.6	14149.2	12107.7
	O43306;O43306-2	ADCY6_HUMAN	ADCY6	ADCY6	Adenylate cyclase type 6	1	0		9540.37	8237.88
	O43307;O43307-2;O43307-3	ARHG9_HUMAN	ARHGEF9	ARHGEF9	Rho guanine nucleotide exchange factor 9	3	2	17315.8	17424.1	17408.5
	O43309	ZSC12_HUMAN	ZSCAN12	ZSCAN12	Zinc finger and SCAN domain-containing protein 12	8	6	14947.8	13401.3	11489.8
	O43310	CTIF_HUMAN	CTIF	CTIF	CBP80/20-dependent translation initiation factor	8	8	20859.1	20102.2	19377.9
	O43318-2	M3K7_HUMAN	MAP3K7	MAP3K7	Isoform 1A of Mitogen-activated protein kinase kinase kinase 7	14	14	39536.5	35434.2	42709.5
	O43324	MCA3_HUMAN	EEF1E1	EEF1E1	Eukaryotic translation elongation factor 1 epsilon-1	6	2	302588	334714	372799
	O43325	LYRM1_HUMAN	LYRM1	LYRM1	LYR motif-containing protein 1	4	4	32213.1	29734.3	27917.9
	O43347	MSI1H_HUMAN	MSI1	MSI1	RNA-binding protein Musashi homolog 1	10	8	277402	243416	259915
	O43353	RIPK2_HUMAN	RIPK2	RIPK2	Receptor-interacting serine/threonine-protein kinase 2	6	6	52480.9	33804.3	31533.8
	O43379	WDR62_HUMAN	WDR62	WDR62	WD repeat-containing protein 62	19	19	139669	144669	131531
	O43390	HNRPR_HUMAN	HNRNPR	HNRNPR	Heterogeneous nuclear ribonucleoprotein R	17	17	757920	756697	740388
	O43390-2	HNRPR_HUMAN	HNRNPR	HNRNPR	Isoform 2 of Heterogeneous nuclear ribonucleoprotein R	2	2	19469.7	30102.9	14794.9
	O43395	PRPF3_HUMAN	PRPF3	PRPF3	U4/U6 small nuclear ribonucleoprotein Prp3	22	22	270297	276457	257566
	O43396	TXNL1_HUMAN	TXNL1	TXNL1	Thioredoxin-like protein 1	16	16	449273	418874	436131
	O43399-6	TPD54_HUMAN	TPD52L2	TPD52L2	Isoform 6 of Tumor protein D54	1	1	176273	187155	170355
	O43399;O43399-5;O43399-7	TPD54_HUMAN	TPD52L2	TPD52L2	Tumor protein D54	11	11	519191	514787	630895
	O43402	EMC8_HUMAN	EMC8	EMC8	ER membrane protein complex subunit 8	12	12	102256	90044.1	95230
	O43414	ERI3_HUMAN	ERI3	ERI3	ERI1 exoribonuclease 3	4	4	42737.5	42834.7	50444
	O43422	P52K_HUMAN	THAP12	THAP12	52 kDa repressor of the inhibitor of the protein kinase	13	13	62172.1	58080.8	49425
	O43426	SYNJ1_HUMAN	SYNJ1	SYNJ1	Synaptojanin-1	9	9	23475.2	25334.1	29982.1
	O43427;O43427-2	FIBP_HUMAN	FIBP	FIBP	Acidic fibroblast growth factor intracellular-binding protein	9	9	89681.4	98703.9	99504.6
	O43439;O43439-2;O43439-4;O43439-5	MTG8R_HUMAN	CBFA2T2	CBFA2T2	Protein CBFA2T2	6	4	49780.4	40279.9	42592.7
	O43447	PPIH_HUMAN	PPIH	PPIH	Peptidyl-prolyl cis-trans isomerase H	10	10	222533	208125	258417
	O43463;O43463-2	SUV91_HUMAN	SUV39H1	SUV39H1	Histone-lysine N-methyltransferase SUV39H1	5	5	22791.4	19391.5	15146.7
	O43464	HTRA2_HUMAN	HTRA2	HTRA2	Serine protease HTRA2, mitochondrial	5	4	58843.5	57602.3	56128.5
	O43482	MS18B_HUMAN	OIP5	OIP5	Protein Mis18-beta	2	2	71307.5	54287.2	51441.3
	O43488	ARK72_HUMAN	AKR7A2	AKR7A2	Aflatoxin B1 aldehyde reductase member 2	6	3	139940	141121	180347
Yes	O43490;O43490-2;O43490-3;O43490-4;O43490-5;O43490-6;O43490-7	PROM1_HUMAN	PROM1	PROM1	Prominin-1	15	15	36024.6	35426.7	33379.5
	O43491	E41L2_HUMAN	EPB41L2	EPB41L2	Band 4.1-like protein 2	1	1	9903.73	13931.6	14909.5
	O43502	RA51C_HUMAN	RAD51C	RAD51C	DNA repair protein RAD51 homolog 3	6	6	15956.5	15525	17533.1
	O43504	LTOR5_HUMAN	LAMTOR5	LAMTOR5	Ragulator complex protein LAMTOR5	3	3	94958.9	95525.7	93509.5
	O43505	B4GA1_HUMAN	B4GAT1	B4GAT1	Beta-1,4-glucuronyltransferase 1	7	7	52878.4	50537	40597.5
	O43513	MED7_HUMAN	MED7	MED7	Mediator of RNA polymerase II transcription subunit 7	1	1	63584.1	55328.6	66250.4
	O43516;O43516-3	WIPF1_HUMAN	WIPF1	WIPF1	WAS/WASL-interacting protein family member 1	9	9	47548.8	38461.4	58893.8
	O43524	FOXO3_HUMAN	FOXO3	FOXO3	Forkhead box protein O3	2	1	35838.6	39095.7	48588.8
	O43529	CHSTA_HUMAN	CHST10	CHST10	Carbohydrate sulfotransferase 10	3	3		32256.8	29372.2
	O43542	XRCC3_HUMAN	XRCC3	XRCC3	DNA repair protein XRCC3	5	5	16105.6	16584.1	15066.8
	O43556;O43556-3;O43556-4	SGCE_HUMAN	SGCE	SGCE	Epsilon-sarcoglycan	4	4	25671.7	21489.3	17781.5
	O43572	AKA10_HUMAN	AKAP10	AKAP10	A-kinase anchor protein 10, mitochondrial	12	12	59847.2	62842	60521.6
	O43583	DENR_HUMAN	DENR	DENR	Density-regulated protein	8	8	268164	304623	269859
	O43592	XPOT_HUMAN	XPOT	XPOT	Exportin-T	20	20	158213	155807	173420
	O43597	SPY2_HUMAN	SPRY2	SPRY2	Protein sprouty homolog 2	4	4	29040.3	24300.4	26335.8
	O43598	DNPH1_HUMAN	DNPH1	DNPH1	5-hydroxymethyl-dUMP N-hydrolase	2	2	451340	414232	452406
	O43602;O43602-2	DCX_HUMAN	DCX	DCX	Neuronal migration protein doublecortin	7	6	47530	46215	57558.4
	O43609	SPY1_HUMAN	SPRY1	SPRY1	Protein sprouty homolog 1	4	4	36932.9	28813.4	35388.7
	O43615	TIM44_HUMAN	TIMM44	TIMM44	Mitochondrial import inner membrane translocase subunit TIM44	21	21	248400	274553	214276
	O43617	TPPC3_HUMAN	TRAPPC3	TRAPPC3	Trafficking protein particle complex subunit 3	10	10	149767	163070	194827
	O43623	SNAI2_HUMAN	SNAI2	SNAI2	Zinc finger protein SNAI2	2	2	29049.4	23748	24314.9
	O43633	CHM2A_HUMAN	CHMP2A	CHMP2A	Charged multivesicular body protein 2a	5	5	189639	203224	224996
	O43639	NCK2_HUMAN	NCK2	NCK2	Cytoplasmic protein NCK2	15	14	107446	95066.8	101248
	O43657	TSN6_HUMAN	TSPAN6	TSPAN6	Tetraspanin-6	7	7	294160	296605	300954
	O43660;O43660-2	PLRG1_HUMAN	PLRG1	PLRG1	Pleiotropic regulator 1	18	18	218970	216583	265828
	O43663	PRC1_HUMAN	PRC1	PRC1	Protein regulator of cytokinesis 1	13	13	210814	219660	206434
	O43663-3	PRC1_HUMAN	PRC1	PRC1	Isoform 3 of Protein regulator of cytokinesis 1	1	1	21343.1	17378.8	18743.1
	O43665;O43665-1;O43665-2	RGS10_HUMAN	RGS10	RGS10	Regulator of G-protein signaling 10	3	3	44706.1	33718.6	32044.5
	O43670-2	ZN207_HUMAN	ZNF207	ZNF207	Isoform 2 of BUB3-interacting and GLEBS motif-containing protein ZNF207	1	1	92916.5	81952.5	93339.6
	O43670;O43670-4	ZN207_HUMAN	ZNF207	ZNF207	BUB3-interacting and GLEBS motif-containing protein ZNF207	9	9	938401	880468	1.11198e+06
	O43674;O43674-2	NDUB5_HUMAN	NDUFB5	NDUFB5	NADH dehydrogenase [ubiquinone] 1 beta subcomplex subunit 5, mitochondrial	2	2	185589	199819	161436
	O43676	NDUB3_HUMAN	NDUFB3	NDUFB3	NADH dehydrogenase [ubiquinone] 1 beta subcomplex subunit 3	3	3	240171	193333	219498
	O43677	NDUC1_HUMAN	NDUFC1	NDUFC1	NADH dehydrogenase [ubiquinone] 1 subunit C1, mitochondrial	3	3	102551	99924.3	115166
	O43678	NDUA2_HUMAN	NDUFA2	NDUFA2	NADH dehydrogenase [ubiquinone] 1 alpha subcomplex subunit 2	5	5	178796	174272	249901
	O43679;O43679-2;O43679-3	LDB2_HUMAN	LDB2	LDB2	LIM domain-binding protein 2	1	1	4651.66	8069.58	6792.55
	O43681	GET3_HUMAN	GET3	GET3	ATPase GET3	12	12	170982	163001	176522
	O43683;O43683-2	BUB1_HUMAN	BUB1	BUB1	Mitotic checkpoint serine/threonine-protein kinase BUB1	18	18	323795	301744	305245
	O43684;O43684-2	BUB3_HUMAN	BUB3	BUB3	Mitotic checkpoint protein BUB3	13	13	862237	851076	851975
	O43707	ACTN4_HUMAN	ACTN4	ACTN4	Alpha-actinin-4	2	1	111370	175490	143561
	O43709;O43709-3	BUD23_HUMAN	BUD23	BUD23	18S rRNA (guanine-N(7))-methyltransferase	6	6	40235.6	36334.9	52313.3
	O43715	TRIA1_HUMAN	TRIAP1	TRIAP1	TP53-regulated inhibitor of apoptosis 1	3	3	32020.9	41833.4	48331.4
	O43719	HTSF1_HUMAN	HTATSF1	HTATSF1	17S U2 SnRNP complex component HTATSF1	31	31	334404	312136	388461
	O43736;O43736-2	ITM2A_HUMAN	ITM2A	ITM2A	Integral membrane protein 2A	2	2	4337.92	4496.79	4194.97
	O43739;O43739-2	CYH3_HUMAN	CYTH3	CYTH3	Cytohesin-3	1	1		5528.07
	O43741	AAKB2_HUMAN	PRKAB2	PRKAB2	5'-AMP-activated protein kinase subunit beta-2	3	3	28323.1	28279.1	21314.4
	O43747;O43747-2	AP1G1_HUMAN	AP1G1	AP1G1	AP-1 complex subunit gamma-1	22	22	188494	206285	197656
	O43752	STX6_HUMAN	STX6	STX6	Syntaxin-6	6	6	52306.2	45273.8	47812.2
	O43759;O43759-2	SNG1_HUMAN	SYNGR1	SYNGR1	Synaptogyrin-1	2	2	77713.5	70196.9	89880.4
	O43760;O43760-2	SNG2_HUMAN	SYNGR2	SYNGR2	Synaptogyrin-2	2	2	34426	55650.6	54692.1
	O43765	SGTA_HUMAN	SGTA	SGTA	Small glutamine-rich tetratricopeptide repeat-containing protein alpha	10	10	494774	463955	488053
	O43766;O43766-3	LIAS_HUMAN	LIAS	LIAS	Lipoyl synthase, mitochondrial	1	1	8563.62	8262.69
	O43768;O43768-2;O43768-3;O43768-4;O43768-9	ENSA_HUMAN	ENSA	ENSA	Alpha-endosulfine	9	8	728511	655853	949026
	O43772	MCAT_HUMAN	SLC25A20	SLC25A20	Mitochondrial carnitine/acylcarnitine carrier protein	2	2	54484.6	78708.2	88963.1
	O43776	SYNC_HUMAN	NARS1	NARS1	Asparagine--tRNA ligase, cytoplasmic	21	21	1.18631e+06	1.32422e+06	1.42041e+06
	O43791	SPOP_HUMAN	SPOP	SPOP	Speckle-type POZ protein	5	5	29498	24294.9	37943.6
	O43795	MYO1B_HUMAN	MYO1B	MYO1B	Unconventional myosin-Ib	37	34	334959	323984	389112
	O43805	SSNA1_HUMAN	SSNA1	SSNA1	Microtubule nucleation factor SSNA1	3	3	142901	132535	162943
	O43808	PM34_HUMAN	SLC25A17	SLC25A17	Peroxisomal membrane protein PMP34	1	1	5640.62	4126.97	5719.99
	O43809	CPSF5_HUMAN	NUDT21	NUDT21	Cleavage and polyadenylation specificity factor subunit 5	11	11	624455	551230	599391
	O43813	LANC1_HUMAN	LANCL1	LANCL1	Glutathione S-transferase LANCL1	10	10	101678	114035	140816
	O43815	STRN_HUMAN	STRN	STRN	Striatin	26	25	129447	123357	116591
	O43818	U3IP2_HUMAN	RRP9	RRP9	U3 small nucleolar RNA-interacting protein 2	15	15	500626	562240	544786
	O43819	SCO2_HUMAN	SCO2	SCO2	Protein SCO2 homolog, mitochondrial	5	5	44995.9	42395.1	31934.6
	O43822;O43822-3;O43822-4	CF410_HUMAN	CFAP410	CFAP410	Cilia- and flagella-associated protein 410	5	5	143033	95972.7	111556
	O43823	AKAP8_HUMAN	AKAP8	AKAP8	A-kinase anchor protein 8	15	15	129306	117403	125768
	O43824	GTPB6_HUMAN	GTPBP6	GTPBP6	Putative GTP-binding protein 6	17	17	46782.8	42885.3	38934.4
	O43829	ZBT14_HUMAN	ZBTB14	ZBTB14	Zinc finger and BTB domain-containing protein 14	5	5	20991.7	21492.5	23220.7
	O43837	IDH3B_HUMAN	IDH3B	IDH3B	Isocitrate dehydrogenase [NAD] subunit beta, mitochondrial	7	7	73200.3	74527.6	68520.4
	O43847;O43847-2	NRDC_HUMAN	NRDC	NRDC	Nardilysin	38	38	185550	180982	191058
	O43852-8	CALU_HUMAN	CALU	CALU	Isoform 8 of Calumenin	3	3	484970	386189	621386
	O43852;O43852-3	CALU_HUMAN	CALU	CALU	Calumenin	20	20	2.47436e+06	2.28421e+06	3.27187e+06
	O43854;O43854-2	EDIL3_HUMAN	EDIL3	EDIL3	EGF-like repeat and discoidin I-like domain-containing protein 3	7	7	46800.2	49082.5	45381.2
	O43861;O43861-2	ATP9B_HUMAN	ATP9B	ATP9B	Probable phospholipid-transporting ATPase IIB	2	2		18968
	O43865	SAHH2_HUMAN	AHCYL1	AHCYL1	S-adenosylhomocysteine hydrolase-like protein 1	16	6	173409	191350	203663
	O43896	KIF1C_HUMAN	KIF1C	KIF1C	Kinesin-like protein KIF1C	8	8	23420.3	19958	21465.5
	O43903	GAS2_HUMAN	GAS2	GAS2	Growth arrest-specific protein 2	6	6	32385.1	35291.1	31087.1
	O43909	EXTL3_HUMAN	EXTL3	EXTL3	Exostosin-like 3	10	10	20339.8	20187.9	18629.3
	O43913	ORC5_HUMAN	ORC5	ORC5	Origin recognition complex subunit 5	13	13	111152	101828	111936
	O43920	NDUS5_HUMAN	NDUFS5	NDUFS5	NADH dehydrogenase [ubiquinone] iron-sulfur protein 5	6	6	141935	139164	150929
	O43924	PDE6D_HUMAN	PDE6D	PDE6D	Retinal rod rhodopsin-sensitive cGMP 3',5'-cyclic phosphodiesterase subunit delta	3	3	81718.3	80786.7	84635.5
	O43929	ORC4_HUMAN	ORC4	ORC4	Origin recognition complex subunit 4	14	14	76777.1	65219.1	74290.9
	O43933	PEX1_HUMAN	PEX1	PEX1	Peroxisomal ATPase PEX1	11	11	37775.1	44526.6	38639.7
	O60216	RAD21_HUMAN	RAD21	RAD21	Double-strand-break repair protein rad21 homolog	23	21	109997	105649	108304
	O60220	TIM8A_HUMAN	TIMM8A	TIMM8A	Mitochondrial import inner membrane translocase subunit Tim8 A	2	2	311551	268422	353094
	O60231	DHX16_HUMAN	DHX16	DHX16	Pre-mRNA-splicing factor ATP-dependent RNA helicase DHX16	22	22	94994.4	102367	100353
	O60232	ZNRD2_HUMAN	ZNRD2	ZNRD2	Protein ZNRD2	7	7	377767	369492	390996
	O60237-6	MYPT2_HUMAN	PPP1R12B	PPP1R12B	Isoform 6 of Protein phosphatase 1 regulatory subunit 12B	2	2		2496.43	3129.4
	O60238;O60238-2	BNI3L_HUMAN	BNIP3L	BNIP3L	BCL2/adenovirus E1B 19 kDa protein-interacting protein 3-like	2	2	38717.1	39060.8	48018.6
	O60244	MED14_HUMAN	MED14	MED14	Mediator of RNA polymerase II transcription subunit 14	26	26	57373.6	60198.8	64284.4
	O60256	KPRB_HUMAN	PRPSAP2	PRPSAP2	Phosphoribosyl pyrophosphate synthase-associated protein 2	13	12	163801	170808	178350
	O60262	GBG7_HUMAN	GNG7	GNG7	Guanine nucleotide-binding protein G(I)/G(S)/G(O) subunit gamma-7	1	1	25735.5	23912.8	53005
	O60264	SMCA5_HUMAN	SMARCA5	SMARCA5	SWI/SNF-related matrix-associated actin-dependent regulator of chromatin subfamily A member 5	44	34	289110	319878	302662
	O60271	JIP4_HUMAN	SPAG9	SPAG9	C-Jun-amino-terminal kinase-interacting protein 4	44	39	117946	118692	125023
	O60271-2;O60271-4	JIP4_HUMAN	SPAG9	SPAG9	Isoform 2 of C-Jun-amino-terminal kinase-interacting protein 4	1	1	37771.5	35797.1	38179.1
	O60279	SUSD5_HUMAN	SUSD5	SUSD5	Sushi domain-containing protein 5	2	2	21530.8	18204.3	19242.1
	O60281	ZN292_HUMAN	ZNF292	ZNF292	Zinc finger protein 292	23	23	27995.1	25760.3	19586.1
	O60282	KIF5C_HUMAN	KIF5C	KIF5C	Kinesin heavy chain isoform 5C	32	29	123770	124654	125364
	O60285	NUAK1_HUMAN	NUAK1	NUAK1	NUAK family SNF1-like kinase 1	3	3	14456.4	13143.8	13649.8
	O60287	NPA1P_HUMAN	URB1	URB1	Nucleolar pre-ribosomal-associated protein 1	39	39	125902	133647	129905
	O60291;O60291-2;O60291-3;O60291-4	MGRN1_HUMAN	MGRN1	MGRN1	E3 ubiquitin-protein ligase MGRN1	9	9	33050.8	29288.6	22530.9
	O60292	SI1L3_HUMAN	SIPA1L3	SIPA1L3	Signal-induced proliferation-associated 1-like protein 3	11	11	31322.8	26371.5	27192.6
	O60293	ZC3H1_HUMAN	ZFC3H1	ZFC3H1	Zinc finger C3H1 domain-containing protein	16	16	247527	204657	193205
	O60294	TYW4_HUMAN	LCMT2	LCMT2	tRNA wybutosine-synthesizing protein 4	12	12	47619.5	44949.3	49773.7
	O60303	KATIP_HUMAN	KATNIP	KATNIP	Katanin-interacting protein	3	3	10345	9992.21	6846.84
	O60306	AQR_HUMAN	AQR	AQR	RNA helicase aquarius	40	40	146077	143575	145101
	O60307	MAST3_HUMAN	MAST3	MAST3	Microtubule-associated serine/threonine-protein kinase 3	2	2	107112	190470
	O60313-2	OPA1_HUMAN	OPA1	OPA1	Isoform 2 of Dynamin-like GTPase OPA1, mitochondrial	38	38	272764	261189	232935
	O60318	GANP_HUMAN	MCM3AP	MCM3AP	Germinal-center associated nuclear protein	26	26	57780.8	54634.1	49241.3
	O60331;O60331-2;O60331-3;O60331-4	PI51C_HUMAN	PIP5K1C	PIP5K1C	Phosphatidylinositol 4-phosphate 5-kinase type-1 gamma	8	6	126620	99973.7	140350
	O60333-3	KIF1B_HUMAN	KIF1B	KIF1B	Isoform 3 of Kinesin-like protein KIF1B	10	9	32002.1	35023.9	36685.2
	O60336;O60336-3;O60336-6	MABP1_HUMAN	MAPKBP1	MAPKBP1	Mitogen-activated protein kinase-binding protein 1	2	2	5238.05	5005.39	5001.45
	O60341	KDM1A_HUMAN	KDM1A	KDM1A	Lysine-specific histone demethylase 1A	27	27	205248	216170	229221
	O60343;O60343-2;O60343-3	TBCD4_HUMAN	TBC1D4	TBC1D4	TBC1 domain family member 4	26	24	48789	53511	55983.3
	O60346	PHLP1_HUMAN	PHLPP1	PHLPP1	PH domain leucine-rich repeat-containing protein phosphatase 1	5	5	28876.3	26888.2	22001.4
	O60353;O60353-2	FZD6_HUMAN	FZD6	FZD6	Frizzled-6	3	3	87684.7	84068.1	60152.4
	O60427	FADS1_HUMAN	FADS1	FADS1	Acyl-CoA (8-3)-desaturase	12	12	83530.7	86811.8	89693.2
	O60437	PEPL_HUMAN	PPL	PPL	Periplakin	3	3	158627
	O60443	GSDME_HUMAN	GSDME	GSDME	Gasdermin-E	13	13	61696.5	59756.7	70646.7
	O60447;O60447-2	EVI5_HUMAN	EVI5	EVI5	Ecotropic viral integration site 5 protein homolog	6	6	18637.5	17790.3	16977.5
	O60462-4;O60462-5	NRP2_HUMAN	NRP2	NRP2	Isoform B0 of Neuropilin-2	23	23	100657	100472	101830
	O60476	MA1A2_HUMAN	MAN1A2	MAN1A2	Mannosyl-oligosaccharide 1,2-alpha-mannosidase IB	10	10	287139	305270	243809
	O60488;O60488-2	ACSL4_HUMAN	ACSL4	ACSL4	Long-chain-fatty-acid--CoA ligase 4	14	14	49614.1	42273.4	40588.3
	O60493	SNX3_HUMAN	SNX3	SNX3	Sorting nexin-3	8	7	241686	270395	313614
	O60499	STX10_HUMAN	STX10	STX10	Syntaxin-10	3	3	71873.3	69029.5	76329.9
	O60502	OGA_HUMAN	OGA	OGA	Protein O-GlcNAcase	26	26	147095	147361	160318
	O60504;O60504-2	VINEX_HUMAN	SORBS3	SORBS3	Vinexin	13	13	113472	117306	141601
	O60507	TPST1_HUMAN	TPST1	TPST1	Protein-tyrosine sulfotransferase 1	2	2	27003.8	23536.5	22310.9
	O60508	PRP17_HUMAN	CDC40	CDC40	Pre-mRNA-processing factor 17	20	20	63919.1	66075	63496.2
	O60512	B4GT3_HUMAN	B4GALT3	B4GALT3	Beta-1,4-galactosyltransferase 3	3	3	17789.3	17788.3	15119.1
	O60513	B4GT4_HUMAN	B4GALT4	B4GALT4	Beta-1,4-galactosyltransferase 4	4	4	16768.7	16769.9	14274.4
	O60518	RNBP6_HUMAN	RANBP6	RANBP6	Ran-binding protein 6	20	20	219968	231943	237549
	O60524;O60524-4	NEMF_HUMAN	NEMF	NEMF	Ribosome quality control complex subunit NEMF	20	20	155262	159490	174376
	O60547;O60547-2	GMDS_HUMAN	GMDS	GMDS	GDP-mannose 4,6 dehydratase	10	10	66390	71152.6	65671.4
	O60551	NMT2_HUMAN	NMT2	NMT2	Glycylpeptide N-tetradecanoyltransferase 2	5	5	20835.8	15484.5	20198.1
	O60563	CCNT1_HUMAN	CCNT1	CCNT1	Cyclin-T1	15	13	59143.7	55604.1	51010
	O60566-3;O60566	BUB1B_HUMAN	BUB1B	BUB1B	Mitotic checkpoint serine/threonine-protein kinase BUB1 beta	35	33	55424.4	56600.6	55998.9
	O60568	PLOD3_HUMAN	PLOD3	PLOD3	Multifunctional procollagen lysine hydroxylase and glycosyltransferase LH3	24	24	236519	255855	276793
	O60573	IF4E2_HUMAN	EIF4E2	EIF4E2	Eukaryotic translation initiation factor 4E type 2	5	5	81258.2	79339.7	75712.6
	O60583;O60583-2	CCNT2_HUMAN	CCNT2	CCNT2	Cyclin-T2	6	6	44323.7	44364.9	46354.9
	O60610;O60610-2;O60610-3	DIAP1_HUMAN	DIAPH1	DIAPH1	Protein diaphanous homolog 1	33	33	156601	166644	170904
	O60613	SEP15_HUMAN	SELENOF	SELENOF	Selenoprotein F	4	4	82230.1	80335.3	84987.4
	O60637;O60637-3	TSN3_HUMAN	TSPAN3	TSPAN3	Tetraspanin-3	4	4	173581	262781	318550
	O60645	EXOC3_HUMAN	EXOC3	EXOC3	Exocyst complex component 3	14	14	243530	260660	274492
	O60664;O60664-4	PLIN3_HUMAN	PLIN3	PLIN3	Perilipin-3	19	19	363024	399886	458199
	O60671	RAD1_HUMAN	RAD1	RAD1	Cell cycle checkpoint protein RAD1	6	6	55454.1	61579.7	63233
	O60678	ANM3_HUMAN	PRMT3	PRMT3	Protein arginine N-methyltransferase 3	16	16	53906.5	60593.3	52609.9
	O60684	IMA7_HUMAN	KPNA6	KPNA6	Importin subunit alpha-7	10	7	282231	290844	284330
	O60701	UGDH_HUMAN	UGDH	UGDH	UDP-glucose 6-dehydrogenase	28	28	519167	552315	636984
	O60704	TPST2_HUMAN	TPST2	TPST2	Protein-tyrosine sulfotransferase 2	1	1	16253.1	15556.6
	O60716-11;O60716-9;O60716-10;O60716-13	CTND1_HUMAN	CTNND1	CTNND1	Isoform 2AB of Catenin delta-1	1	1	327873	293611	271892
	O60716-4;O60716-7;O60716-6;O60716-8	CTND1_HUMAN	CTNND1	CTNND1	Isoform 1BC of Catenin delta-1	34	34	238770	249081	229234
	O60725	ICMT_HUMAN	ICMT	ICMT	Protein-S-isoprenylcysteine O-methyltransferase	1	1	44320.4	35392.4	26296.1
	O60739	EIF1B_HUMAN	EIF1B	EIF1B	Eukaryotic translation initiation factor 1b	6	1	1.53181e+06	1.53516e+06	1.87675e+06
	O60749	SNX2_HUMAN	SNX2	SNX2	Sorting nexin-2	21	19	472895	492463	526951
	O60762	DPM1_HUMAN	DPM1	DPM1	Dolichol-phosphate mannosyltransferase subunit 1	10	10	211821	184876	185557
	O60763	USO1_HUMAN	USO1	USO1	General vesicular transport factor p115	35	35	208737	207514	224335
	O60765	Z354A_HUMAN	ZNF354A	ZNF354A	Zinc finger protein 354A	3	2	27132.6	20477.2	36009
	O60783	RT14_HUMAN	MRPS14	MRPS14	Small ribosomal subunit protein uS14m	3	3	24812.8	29131.5	27946.5
	O60784	TOM1_HUMAN	TOM1	TOM1	Target of Myb1 membrane trafficking protein	10	10	137170	142147	126996
	O60814;P57053;P62807	H2B1C_HUMAN;H2B1K_HUMAN;H2BFS_HUMAN	H2BC12;H2BC12L;H2BC4	H2BC12	Histone H2B type 1-K	11	0	6.52909e+06	7.81159e+06	9.32686e+06
	O60825;O60825-2	F262_HUMAN	PFKFB2	PFKFB2	6-phosphofructo-2-kinase/fructose-2,6-bisphosphatase 2	8	7	34402.8	31987.4	32248.4
	O60826	CCD22_HUMAN	CCDC22	CCDC22	Coiled-coil domain-containing protein 22	26	26	100489	105438	100139
	O60828;O60828-2;O60828-5	PQBP1_HUMAN	PQBP1	PQBP1	Polyglutamine-binding protein 1	8	8	212984	199881	311102
	O60830;O60830-2	TI17B_HUMAN	TIMM17B	TIMM17B	Mitochondrial import inner membrane translocase subunit Tim17-B	4	4	54733.8	67722.9	45617.1
	O60831	PRAF2_HUMAN	PRAF2	PRAF2	PRA1 family protein 2	4	4	156475	157694	122529
	O60832	DKC1_HUMAN	DKC1	DKC1	H/ACA ribonucleoprotein complex subunit DKC1	20	20	328940	330989	299744
	O60841	IF2P_HUMAN	EIF5B	EIF5B	Eukaryotic translation initiation factor 5B	41	41	418087	404997	398012
	O60858;O60858-3	TRI13_HUMAN	TRIM13	TRIM13	E3 ubiquitin-protein ligase TRIM13	3	3	88504.3	83476.7	91192.2
	O60861;O60861-1;O60861-2;O60861-4	GAS7_HUMAN	GAS7	GAS7	Growth arrest-specific protein 7	1	1	11897.6		9318.96
	O60869	EDF1_HUMAN	EDF1	EDF1	Endothelial differentiation-related factor 1	7	7	1.92208e+06	1.53284e+06	1.78555e+06
	O60870	KIN17_HUMAN	KIN	KIN	DNA/RNA-binding protein KIN17	13	13	201908	190303	201067
Yes	O60879;O60879-2;O60879-3	DIAP2_HUMAN	DIAPH2	DIAPH2	Protein diaphanous homolog 2	12	12	55517.2	53821.9	51873.7
	O60884	DNJA2_HUMAN	DNAJA2	DNAJA2	DnaJ homolog subfamily A member 2	12	12	432205	449042	504565
	O60885	BRD4_HUMAN	BRD4	BRD4	Bromodomain-containing protein 4	27	19	162052	161289	180058
	O60888-3	CUTA_HUMAN	CUTA	CUTA	Isoform C of Protein CutA	5	5	666354	549525	785841
	O60911	CATL2_HUMAN	CTSV	CTSV	Cathepsin L2	6	5	121271	115278	134522
	O60921	HUS1_HUMAN	HUS1	HUS1	Checkpoint protein HUS1	7	7	41177	35895.1	34523.6
	O60925	PFD1_HUMAN	PFDN1	PFDN1	Prefoldin subunit 1	7	7	658392	708948	1.03493e+06
	O60927	PP1RB_HUMAN	PPP1R11	PPP1R11	E3 ubiquitin-protein ligase PPP1R11	3	3	11402	22495.7	25008.5
	O60930	RNH1_HUMAN	RNASEH1	RNASEH1	Ribonuclease H1	4	4	43488.1	37062.3	29785.4
	O60934	NBN_HUMAN	NBN	NBN	Nibrin	21	21	317202	304837	299353
	O60936;O60936-3	NOL3_HUMAN	NOL3	NOL3	Nucleolar protein 3	4	4	32205	27681.7	27808.9
	O60941;O60941-7	DTNB_HUMAN	DTNB	DTNB	Dystrobrevin beta	3	2	22041.8	21716.8	15744.4
	O60942	MCE1_HUMAN	RNGTT	RNGTT	mRNA-capping enzyme	18	18	67299.5	62885.4	64233.9
	O75027;O75027-2	ABCB7_HUMAN	ABCB7	ABCB7	Iron-sulfur clusters transporter ABCB7, mitochondrial	11	11	42236.4	40257.6	32074.4
	O75044	SRGP2_HUMAN	SRGAP2	SRGAP2	SLIT-ROBO Rho GTPase-activating protein 2	35	21	136840	138146	138367
	O75051	PLXA2_HUMAN	PLXNA2	PLXNA2	Plexin-A2	14	12	34921.3	31456.4	28505.7
	O75052;O75052-3	CAPON_HUMAN	NOS1AP	NOS1AP	Carboxyl-terminal PDZ ligand of neuronal nitric oxide synthase protein	6	6	49341.3	49078.2	40985.6
	O75054	IGSF3_HUMAN	IGSF3	IGSF3	Immunoglobulin superfamily member 3	19	19	45735.2	45842.7	41952
	O75054-2	IGSF3_HUMAN	IGSF3	IGSF3	Isoform 2 of Immunoglobulin superfamily member 3	1	1	7543.98	14139.3	6348.41
	O75056	SDC3_HUMAN	SDC3	SDC3	Syndecan-3	3	3	36137.2	34436.6	59634.2
	O75063	XYLK_HUMAN	FAM20B	FAM20B	Glycosaminoglycan xylosylkinase	9	9	20599.2	22653.5	21652.9
	O75064	DEN4B_HUMAN	DENND4B	DENND4B	DENN domain-containing protein 4B	2	2	9970.53	9967.73	6427.82
	O75071	EFC14_HUMAN	EFCAB14	EFCAB14	EF-hand calcium-binding domain-containing protein 14	2	2	30096.1		29436.8
	O75083	WDR1_HUMAN	WDR1	WDR1	WD repeat-containing protein 1	24	24	1.18204e+06	1.24726e+06	1.43608e+06
	O75084	FZD7_HUMAN	FZD7	FZD7	Frizzled-7	2	2	19911.7	24051.9	18677.4
	O75094;O75094-3	SLIT3_HUMAN	SLIT3	SLIT3	Slit homolog 3 protein	9	9	18406.7	15776.6	17482.9
	O75096	LRP4_HUMAN	LRP4	LRP4	Low-density lipoprotein receptor-related protein 4	17	17	60647.4	63763.8	51475.6
	O75110	ATP9A_HUMAN	ATP9A	ATP9A	Probable phospholipid-transporting ATPase IIA	7	6	73048.8	71039.2	54815.1
	O75113	N4BP1_HUMAN	N4BP1	N4BP1	NEDD4-binding protein 1	19	19	47609.6	45724.6	46643.8
	O75116	ROCK2_HUMAN	ROCK2	ROCK2	Rho-associated protein kinase 2	55	47	434253	451745	465828
	O75123;O75123-2	ZN623_HUMAN	ZNF623	ZNF623	Zinc finger protein 623	3	2	8916.65	8185.71	6763.38
	O75131	CPNE3_HUMAN	CPNE3	CPNE3	Copine-3	18	17	416777	421357	460003
	O75132	ZBED4_HUMAN	ZBED4	ZBED4	Zinc finger BED domain-containing protein 4	9	9	22022.6	17605.8	18992.2
	O75143;O75143-2;O75143-5	ATG13_HUMAN	ATG13	ATG13	Autophagy-related protein 13	8	8	208098	184221	162419
	O75146	HIP1R_HUMAN	HIP1R	HIP1R	Huntingtin-interacting protein 1-related protein	20	20	55664.8	58035.7	59497.7
	O75147;O75147-4	OBSL1_HUMAN	OBSL1	OBSL1	Obscurin-like protein 1	31	31	202107	190129	213162
	O75150	BRE1B_HUMAN	RNF40	RNF40	E3 ubiquitin-protein ligase BRE1B	33	33	158914	156854	177186
	O75151	PHF2_HUMAN	PHF2	PHF2	Lysine-specific demethylase PHF2	12	11	92485	115259	106235
	O75152	ZC11A_HUMAN	ZC3H11A	ZC3H11A	Zinc finger CCCH domain-containing protein 11A	28	17	76491.5	75902.1	72352.5
	O75153	CLU_HUMAN	CLUH	CLUH	Clustered mitochondria protein homolog	1	1	41416.4	53222.7	37926.8
	O75155	CAND2_HUMAN	CAND2	CAND2	Cullin-associated NEDD8-dissociated protein 2	10	10	15575.2	18255.2	21255.4
	O75157	T22D2_HUMAN	TSC22D2	TSC22D2	TSC22 domain family protein 2	7	7	107326	112185	155867
	O75161	NPHP4_HUMAN	NPHP4	NPHP4	Nephrocystin-4	3	3	8944.63	9981.54	8940.88
	O75164	KDM4A_HUMAN	KDM4A	KDM4A	Lysine-specific demethylase 4A	7	6	23177.1	16396.8	24221.9
	O75165	DJC13_HUMAN	DNAJC13	DNAJC13	DnaJ homolog subfamily C member 13	53	53	66986.1	68042.1	74097.3
	O75167;O75167-2;O75167-4;O75167-5	PHAR2_HUMAN	PHACTR2	PHACTR2	Phosphatase and actin regulator 2	8	8	27987.3	22722.5	25633
	O75170;O75170-2;O75170-3;O75170-4;O75170-5;O75170-6	PP6R2_HUMAN	PPP6R2	PPP6R2	Serine/threonine-protein phosphatase 6 regulatory subunit 2	7	7	21654.6	18144.8	18356.5
	O75175	CNOT3_HUMAN	CNOT3	CNOT3	CCR4-NOT transcription complex subunit 3	19	19	186240	180089	193142
	O75177	CREST_HUMAN	SS18L1	SS18L1	Calcium-responsive transactivator	2	2	69627.4	55200.1	65843.9
	O75179;O75179-2	ANR17_HUMAN	ANKRD17	ANKRD17	Ankyrin repeat domain-containing protein 17	46	30	153854	148844	148948
	O75182;O75182-2	SIN3B_HUMAN	SIN3B	SIN3B	Paired amphipathic helix protein Sin3b	17	17	57460	53836	47867.8
	O75190	DNJB6_HUMAN	DNAJB6	DNAJB6	DnaJ homolog subfamily B member 6	1	1	135351	116805	125215
	O75190-3	DNJB6_HUMAN	DNAJB6	DNAJB6	Isoform C of DnaJ homolog subfamily B member 6	8	6	166169	152640	229958
	O75191	XYLB_HUMAN	XYLB	XYLB	Xylulose kinase	4	4	26537.3	21479.1	21768.2
	O75197	LRP5_HUMAN	LRP5	LRP5	Low-density lipoprotein receptor-related protein 5	2	2		11360.9	10239.9
	O75204	TM127_HUMAN	TMEM127	TMEM127	Transmembrane protein 127	1	1		4946.47
	O75208	COQ9_HUMAN	COQ9	COQ9	Ubiquinone biosynthesis protein COQ9, mitochondrial	5	5	34761.2	39387.4	33331.7
	O75223	GGCT_HUMAN	GGCT	GGCT	Gamma-glutamylcyclotransferase	8	8	374862	399029	426102
	O75251;O75251-2	NDUS7_HUMAN	NDUFS7	NDUFS7	NADH dehydrogenase [ubiquinone] iron-sulfur protein 7, mitochondrial	2	2	94908.5	122910	99181
	O75298;O75298-3	RTN2_HUMAN	RTN2	RTN2	Reticulon-2	3	3	7693.03	13976	15152.1
	O75306;O75306-2	NDUS2_HUMAN	NDUFS2	NDUFS2	NADH dehydrogenase [ubiquinone] iron-sulfur protein 2, mitochondrial	13	13	192719	173759	155846
	O75312	ZPR1_HUMAN	ZPR1	ZPR1	Zinc finger protein ZPR1	15	15	181616	190147	208722
	O75317	UBP12_HUMAN	USP12	USP12	Ubiquitin carboxyl-terminal hydrolase 12	2	2	15522.3	19288.2
	O75319;O75319-1	DUS11_HUMAN	DUSP11	DUSP11	RNA/RNP complex-1-interacting phosphatase	5	5	22842.8	19926.4	14877.4
	O75323	NIPS2_HUMAN	NIPSNAP2	NIPSNAP2	Protein NipSnap homolog 2	4	4	178168	183001	193037
	O75324	SNN_HUMAN	SNN	SNN	Stannin	1	1	70870.8	57275.1	84433.4
	O75326	SEM7A_HUMAN	SEMA7A	SEMA7A	Semaphorin-7A	5	5	18915.1	22978.8	15755.9
	O75330;O75330-2;O75330-3	HMMR_HUMAN	HMMR	HMMR	Hyaluronan mediated motility receptor	26	24	95075.5	87826.9	91176.7
	O75340	PDCD6_HUMAN	PDCD6	PDCD6	Programmed cell death protein 6	7	6	330871	293457	300867
	O75346;O75346-2	ZN253_HUMAN	ZNF253	ZNF253	Zinc finger protein 253	3	2	45582.4	50980.7	52908.2
	O75347	TBCA_HUMAN	TBCA	TBCA	Tubulin-specific chaperone A	11	11	2.01812e+06	2.19093e+06	2.98105e+06
	O75348	VATG1_HUMAN	ATP6V1G1	ATP6V1G1	V-type proton ATPase subunit G 1	2	2	591766	510057	633180
	O75351	VPS4B_HUMAN	VPS4B	VPS4B	Vacuolar protein sorting-associated protein 4B	20	15	190882	194951	241592
	O75352;O75352-2	MPU1_HUMAN	MPDU1	MPDU1	Mannose-P-dolichol utilization defect 1 protein	2	2	234630	207480	196925
	O75354;O75354-2;O75354-3	ENTP6_HUMAN	ENTPD6	ENTPD6	Ectonucleoside triphosphate diphosphohydrolase 6	4	4	55893.4	59282	47171.6
	O75356	ENTP5_HUMAN	ENTPD5	ENTPD5	Nucleoside diphosphate phosphatase ENTPD5	2	2	12187.9	11155.4	12887.2
	O75362	ZN217_HUMAN	ZNF217	ZNF217	Zinc finger protein 217	17	17	66234.5	60023.7	55428.3
	O75365	TP4A3_HUMAN	PTP4A3	PTP4A3	Protein tyrosine phosphatase type IVA 3	3	3	12218.3	10482.5	10892.6
	O75367-1;O75367-3	H2AY_HUMAN	MACROH2A1	MACROH2A1	Isoform 2 of Core histone macro-H2A.1	17	15	430841	521962	458384
	O75368	SH3L1_HUMAN	SH3BGRL	SH3BGRL	Adapter SH3BGRL	7	7	761303	659049	879455
	O75369-8	FLNB_HUMAN	FLNB	FLNB	Isoform 8 of Filamin-B	117	117	525945	545141	611508
	O75379;O75379-2	VAMP4_HUMAN	VAMP4	VAMP4	Vesicle-associated membrane protein 4	5	5	163349	157344	168907
	O75380	NDUS6_HUMAN	NDUFS6	NDUFS6	NADH dehydrogenase [ubiquinone] iron-sulfur protein 6, mitochondrial	5	5	266606	254247	304990
	O75381-2	PEX14_HUMAN	PEX14	PEX14	Isoform 2 of Peroxisomal membrane protein PEX14	9	9	120201	123355	161547
	O75382	TRIM3_HUMAN	TRIM3	TRIM3	Tripartite motif-containing protein 3	13	13	54842.7	56230.3	56214
	O75385	ULK1_HUMAN	ULK1	ULK1	Serine/threonine-protein kinase ULK1	4	3	19242.6	21985.3	18185.4
	O75386;O75386-2	TULP3_HUMAN	TULP3	TULP3	Tubby-related protein 3	2	2	40161.5	31139	35903.8
	O75390	CISY_HUMAN	CS	CS	Citrate synthase, mitochondrial	12	12	476127	536772	649357
	O75391	SPAG7_HUMAN	SPAG7	SPAG7	Sperm-associated antigen 7	9	9	604721	467793	581621
	O75394	RM33_HUMAN	MRPL33	MRPL33	Large ribosomal subunit protein bL33m	1	1	23040.2	32096.2	35610.2
	O75396	SC22B_HUMAN	SEC22B	SEC22B	Vesicle-trafficking protein SEC22b	10	10	315891	320891	294139
	O75398;O75398-3;O75398-4;O75398-5	DEAF1_HUMAN	DEAF1	DEAF1	Deformed epidermal autoregulatory factor 1 homolog	2	2	21735.3	18688.1	12880.5
	O75400	PR40A_HUMAN	PRPF40A	PRPF40A	Pre-mRNA-processing factor 40 homolog A	1	1		14311.9	13337.6
	O75410-2;O75410;O75410-7;O75410-9	TACC1_HUMAN	TACC1	TACC1	Transforming acidic coiled-coil-containing protein 1	16	16	75570	71320.4	70539.5
	O75414	NDK6_HUMAN	NME6	NME6	Nucleoside diphosphate kinase 6	6	6	28333.2	33623.7	29345.1
	O75419;O75419-2;O75419-3	CDC45_HUMAN	CDC45	CDC45	Cell division control protein 45 homolog	7	7	30166.9	30366	36023.8
	O75420	GGYF1_HUMAN	GIGYF1	GIGYF1	GRB10-interacting GYF protein 1	8	8	44000	48673.5	57064.1
	O75427	LRCH4_HUMAN	LRCH4	LRCH4	Leucine-rich repeat and calponin homology domain-containing protein 4	8	8	22601.3	22198.7	20181.6
	O75431;O75431-2	MTX2_HUMAN	MTX2	MTX2	Metaxin-2	8	8	117394	111926	91776.4
	O75436	VP26A_HUMAN	VPS26A	VPS26A	Vacuolar protein sorting-associated protein 26A	16	15	319634	334486	399696
	O75437	ZN254_HUMAN	ZNF254	ZNF254	Zinc finger protein 254	2	0	73938.2	89676.4	80762.1
	O75438	NDUB1_HUMAN	NDUFB1	NDUFB1	NADH dehydrogenase [ubiquinone] 1 beta subcomplex subunit 1	2	2	167791	155423	163819
	O75439	MPPB_HUMAN	PMPCB	PMPCB	Mitochondrial-processing peptidase subunit beta	16	15	315538	292457	298916
	O75446	SAP30_HUMAN	SAP30	SAP30	Histone deacetylase complex subunit SAP30	4	4	76687.3	70192.4	54863.6
	O75448;O75448-2	MED24_HUMAN	MED24	MED24	Mediator of RNA polymerase II transcription subunit 24	20	20	39375.9	39543.3	40645.4
	O75449	KTNA1_HUMAN	KATNA1	KATNA1	Katanin p60 ATPase-containing subunit A1	6	6	21216	19571.8	16757.4
	O75461	E2F6_HUMAN	E2F6	E2F6	Transcription factor E2F6	3	3	11941.4	12789.5	10947
	O75467	Z324A_HUMAN	ZNF324	ZNF324	Zinc finger protein 324A	5	3	668868	842205	674351
	O75473;O75473-2;O75473-3	LGR5_HUMAN	LGR5	LGR5	Leucine-rich repeat-containing G-protein coupled receptor 5	5	5	9041.41	11576.3	7608.23
	O75475	PSIP1_HUMAN	PSIP1	PSIP1	PC4 and SFRS1-interacting protein	16	16	601887	536707	715490
	O75477	ERLN1_HUMAN	ERLIN1	ERLIN1	Erlin-1	9	9	89587	90630.4	90627.7
	O75487	GPC4_HUMAN	GPC4	GPC4	Glypican-4	15	13	150166	157556	165291
	O75489	NDUS3_HUMAN	NDUFS3	NDUFS3	NADH dehydrogenase [ubiquinone] iron-sulfur protein 3, mitochondrial	13	13	145916	144607	161326
	O75494;O75494-2;O75494-3;O75494-4;O75494-5;O75494-6	SRS10_HUMAN	SRSF10	SRSF10	Serine/arginine-rich splicing factor 10	10	7	302830	279252	356357
	O75496	GEMI_HUMAN	GMNN	GMNN	Geminin	7	7	201842	201352	319367
	O75503	CLN5_HUMAN	CLN5	CLN5	Bis(monoacylglycero)phosphate synthase CLN5	5	5	82336.6	80158	89951.7
	O75506	HSBP1_HUMAN	HSBP1	HSBP1	Heat shock factor-binding protein 1	3	3	212057	253801	322919
	O75509	TNR21_HUMAN	TNFRSF21	TNFRSF21	Tumor necrosis factor receptor superfamily member 21	7	7	20555.6	22301.1	23085.6
	O75521;O75521-2	ECI2_HUMAN	ECI2	ECI2	Enoyl-CoA delta isomerase 2	9	9	142325	135950	128847
	O75525;O75525-2	KHDR3_HUMAN	KHDRBS3	KHDRBS3	KH domain-containing, RNA-binding, signal transduction-associated protein 3	4	4	115902	111142	107530
	O75528;O75528-2	TADA3_HUMAN	TADA3	TADA3	Transcriptional adapter 3	11	11	59570.8	56883	56871.1
	O75529	TAF5L_HUMAN	TAF5L	TAF5L	TAF5-like RNA polymerase II p300/CBP-associated factor-associated factor 65 kDa subunit 5L	9	9	29674.3	29653.4	23570.9
	O75530;O75530-3	EED_HUMAN	EED	EED	Polycomb protein EED	12	12	76778.9	75047.1	73526.5
	O75531	BAF_HUMAN	BANF1	BANF1	Barrier-to-autointegration factor	6	6	1.49946e+06	1.62598e+06	1.93516e+06
	O75533	SF3B1_HUMAN	SF3B1	SF3B1	Splicing factor 3B subunit 1	51	51	1.15166e+06	1.12216e+06	1.17339e+06
	O75534;O75534-4	CSDE1_HUMAN	CSDE1	CSDE1	Cold shock domain-containing protein E1	36	36	439707	455248	476008
	O75553;O75553-5	DAB1_HUMAN	DAB1	DAB1	Disabled homolog 1	4	4	19586	13848.1	15127.5
	O75554;O75554-2	WBP4_HUMAN	WBP4	WBP4	WW domain-binding protein 4	5	5	104044	100645	146770
	O75564;O75564-2	JERKY_HUMAN	JRK	JRK	Jerky protein homolog	1	1	7665.23	7901.13	9554.27
	O75569	PRKRA_HUMAN	PRKRA	PRKRA	Interferon-inducible double-stranded RNA-dependent protein kinase activator A	11	11	160455	153002	141433
	O75570	RF1M_HUMAN	MTRF1	MTRF1	Peptide chain release factor 1, mitochondrial	3	3	5713.61	5792.9	5898.66
	O75575	RPC9_HUMAN	CRCP	CRCP	DNA-directed RNA polymerase III subunit RPC9	4	4	89227.5	84364.2	102524
	O75581	LRP6_HUMAN	LRP6	LRP6	Low-density lipoprotein receptor-related protein 6	12	11	21428.1	22788.8	22488.6
	O75586;O75586-2	MED6_HUMAN	MED6	MED6	Mediator of RNA polymerase II transcription subunit 6	6	6	49638.9	53890.3	57941.3
	O75600;O75600-2	KBL_HUMAN	GCAT	GCAT	2-amino-3-ketobutyrate coenzyme A ligase, mitochondrial	6	6	20658.9	20250.9	20287.3
	O75607	NPM3_HUMAN	NPM3	NPM3	Nucleoplasmin-3	5	5	435201	377803	417867
	O75608;O75608-2	LYPA1_HUMAN	LYPLA1	LYPLA1	Acyl-protein thioesterase 1	4	4	212678	251543	290015
	O75616	ERAL1_HUMAN	ERAL1	ERAL1	GTPase Era, mitochondrial	8	8	43660.6	35450.8	34458
	O75629	CREG1_HUMAN	CREG1	CREG1	Protein CREG1	2	2	11082.4	15721.3	12671.9
	O75635;O75635-2	SPB7_HUMAN	SERPINB7	SERPINB7	Serpin B7	1	1	16048.6	21848.6
	O75643	U520_HUMAN	SNRNP200	SNRNP200	U5 small nuclear ribonucleoprotein 200 kDa helicase	103	103	448155	443468	452813
	O75648	MTU1_HUMAN	TRMU	TRMU	Mitochondrial tRNA-specific 2-thiouridylase 1	7	7	21736.9	19817.6	22176.1
	O75663	TIPRL_HUMAN	TIPRL	TIPRL	TIP41-like protein	10	10	207791	195038	221327
	O75665;O75665-3	OFD1_HUMAN	OFD1	OFD1	Centriole and centriolar satellite protein OFD1	13	13	41054.7	38890	39976.3
	O75674	TM1L1_HUMAN	TOM1L1	TOM1L1	TOM1-like protein 1	6	6	75259.2	76539	90737.4
	O75676;O75676-2	KS6A4_HUMAN	RPS6KA4	RPS6KA4	Ribosomal protein S6 kinase alpha-4	6	5	16515.7	18269.6	17535.8
	O75683	SURF6_HUMAN	SURF6	SURF6	Surfeit locus protein 6	3	3	37938.1	29205.1	52277.2
	O75688	PPM1B_HUMAN	PPM1B	PPM1B	Protein phosphatase 1B	12	12	105792	94626.5	110571
	O75691	UTP20_HUMAN	UTP20	UTP20	Small subunit processome component 20 homolog	63	63	645862	674459	661737
	O75694	NU155_HUMAN	NUP155	NUP155	Nuclear pore complex protein Nup155	34	34	178193	177059	150917
	O75695	XRP2_HUMAN	RP2	RP2	Protein XRP2	4	4	179127	153616	146319
	O75717	WDHD1_HUMAN	WDHD1	WDHD1	WD repeat and HMG-box DNA-binding protein 1	46	46	418459	425845	441211
	O75718	CRTAP_HUMAN	CRTAP	CRTAP	Cartilage-associated protein	16	15	242724	269715	278092
	O75746	S2512_HUMAN	SLC25A12	SLC25A12	Electrogenic aspartate/glutamate antiporter SLC25A12, mitochondrial	10	10	43693.5	41290.2	35557
	O75752	B3GL1_HUMAN	B3GALNT1	B3GALNT1	UDP-GalNAc:beta-1,3-N-acetylgalactosaminyltransferase 1	1	1		107228
	O75771;O75771-4	RA51D_HUMAN	RAD51D	RAD51D	DNA repair protein RAD51 homolog 4	3	1	9993.21	8195.17	5661.96
	O75781	PALM_HUMAN	PALM	PALM	Paralemmin-1	4	4	105011	89928.8	108959
	O75781-2	PALM_HUMAN	PALM	PALM	Isoform 2 of Paralemmin-1	1	1	50401.6	42204.1	48461.4
	O75787;O75787-2	RENR_HUMAN	ATP6AP2	ATP6AP2	Renin receptor	10	10	293198	256480	273919
	O75792	RNH2A_HUMAN	RNASEH2A	RNASEH2A	Ribonuclease H2 subunit A	12	12	76565.4	69059.5	73661.4
	O75794	CD123_HUMAN	CDC123	CDC123	Translation initiation factor eIF2 assembly protein	13	13	154418	157829	187458
	O75808	CAN15_HUMAN	CAPN15	CAPN15	Calpain-15	6	6	21248.1	22723.5	14985.1
	O75815	BCAR3_HUMAN	BCAR3	BCAR3	Breast cancer anti-estrogen resistance protein 3	2	2	5424.95	3102.06	3807.64
	O75817	POP7_HUMAN	POP7	POP7	Ribonuclease P protein subunit p20	4	4	100939	99759	93565.3
	O75818;O75818-2	RPP40_HUMAN	RPP40	RPP40	Ribonuclease P protein subunit p40	7	7	45495.6	41231.5	44788.9
	O75820;O75820-2;O75820-4	ZN189_HUMAN	ZNF189	ZNF189	Zinc finger protein 189	6	6	23174.3	22042.9	15849.8
	O75821	EIF3G_HUMAN	EIF3G	EIF3G	Eukaryotic translation initiation factor 3 subunit G	14	14	781865	749731	832298
	O75822	EIF3J_HUMAN	EIF3J	EIF3J	Eukaryotic translation initiation factor 3 subunit J	11	11	633215	583627	712934
	O75828	CBR3_HUMAN	CBR3	CBR3	Carbonyl reductase [NADPH] 3	3	3	64797.6	86206.6	63575.2
	O75832	PSD10_HUMAN	PSMD10	PSMD10	26S proteasome non-ATPase regulatory subunit 10	11	11	204739	250619	211608
	O75843	AP1G2_HUMAN	AP1G2	AP1G2	AP-1 complex subunit gamma-like 2	6	6	22578.8	19037.9	22486.3
	O75844	FACE1_HUMAN	ZMPSTE24	ZMPSTE24	CAAX prenyl protease 1 homolog	11	11	139799	143378	159838
	O75845	SC5D_HUMAN	SC5D	SC5D	Lathosterol oxidase	3	3	74860.7	83528.1	79873.8
	O75864	PPR37_HUMAN	PPP1R37	PPP1R37	Protein phosphatase 1 regulatory subunit 37	6	6	45072	53637.2	39071.8
	O75874	IDHC_HUMAN	IDH1	IDH1	Isocitrate dehydrogenase [NADP] cytoplasmic	22	21	1.39362e+06	1.28262e+06	1.61424e+06
	O75879	GATB_HUMAN	GATB	GATB	Glutamyl-tRNA(Gln) amidotransferase subunit B, mitochondrial	8	8	87481.5	87538.9	75603.6
	O75880	SCO1_HUMAN	SCO1	SCO1	Protein SCO1 homolog, mitochondrial	6	6	61315.5	76408.7	61512.2
	O75881	CP7B1_HUMAN	CYP7B1	CYP7B1	Cytochrome P450 7B1	5	5	26799	33483.9	31688.3
	O75882	ATRN_HUMAN	ATRN	ATRN	Attractin	10	10	31362.2	39098.5	36579.2
	O75884	RBBP9_HUMAN	RBBP9	RBBP9	Serine hydrolase RBBP9	6	6	118068	114549	109580
	O75886	STAM2_HUMAN	STAM2	STAM2	Signal transducing adapter molecule 2	11	11	96907.2	82656.8	94608.4
	O75896	TUSC2_HUMAN	TUSC2	TUSC2	Tumor suppressor candidate 2	3	3	34325.1	32372.6	53530.7
	O75897	ST1C4_HUMAN	SULT1C4	SULT1C4	Sulfotransferase 1C4	3	3	12711.9	11653.7	6287.37
	O75907	DGAT1_HUMAN	DGAT1	DGAT1	Diacylglycerol O-acyltransferase 1	2	2	16905.6	23624.5	28910.5
	O75909;O75909-4	CCNK_HUMAN	CCNK	CCNK	Cyclin-K	12	12	105277	95605.2	89648.8
	O75915	PRAF3_HUMAN	ARL6IP5	ARL6IP5	PRA1 family protein 3	3	3	118444	125870	153863
	O75920;O75920-2	SERF1_HUMAN	SERF1A	SERF1A	Small EDRK-rich factor 1	2	0	77183.2	53776.3	92168.3
	O75923;O75923-10;O75923-11;O75923-12;O75923-13;O75923-14;O75923-15;O75923-2;O75923-3;O75923-4;O75923-5;O75923-6;O75923-7;O75923-8;O75923-9	DYSF_HUMAN	DYSF	DYSF	Dysferlin	5	5	10391.9	11661	6770.42
	O75925;O75925-2	PIAS1_HUMAN	PIAS1	PIAS1	E3 SUMO-protein ligase PIAS1	8	7	122446	106480	82703.9
	O75928;O75928-2	PIAS2_HUMAN	PIAS2	PIAS2	E3 SUMO-protein ligase PIAS2	5	5	13692.1	15507.7	17869.9
	O75934	SPF27_HUMAN	BCAS2	BCAS2	Pre-mRNA-splicing factor SPF27	10	10	144204	170904	183044
	O75935;O75935-3	DCTN3_HUMAN	DCTN3	DCTN3	Dynactin subunit 3	7	7	165229	179807	209484
	O75937	DNJC8_HUMAN	DNAJC8	DNAJC8	DnaJ homolog subfamily C member 8	11	11	761065	771689	825575
	O75940	SPF30_HUMAN	SMNDC1	SMNDC1	Survival of motor neuron-related-splicing factor 30	6	6	249330	266756	353420
	O75947	ATP5H_HUMAN	ATP5PD	ATP5PD	ATP synthase subunit d, mitochondrial	9	9	1.18064e+06	1.2429e+06	1.42071e+06
	O75953;O75953-4;O75953-5	DNJB5_HUMAN	DNAJB5	DNAJB5	DnaJ homolog subfamily B member 5	10	10	30344.2	26663.6	25571.7
	O75954	TSN9_HUMAN	TSPAN9	TSPAN9	Tetraspanin-9	2	2	45458.1	39485.7	38270.6
	O75955	FLOT1_HUMAN	FLOT1	FLOT1	Flotillin-1	19	19	107811	112033	97138.8
	O75962	TRIO_HUMAN	TRIO	TRIO	Triple functional domain protein	47	38	233955	250110	239147
	O75964	ATP5L_HUMAN	ATP5MG	ATP5MG	ATP synthase subunit g, mitochondrial	5	5	424348	469542	483918
	O75970;O75970-3	MPDZ_HUMAN	MPDZ	MPDZ	Multiple PDZ domain protein	30	29	44153.3	44254.8	40806.1
	O75971	SNPC5_HUMAN	SNAPC5	SNAPC5	snRNA-activating protein complex subunit 5	2	2	43835	37695	43317.7
	O75976	CBPD_HUMAN	CPD	CPD	Carboxypeptidase D	32	32	70191.4	70153.1	76564.4
	O76003	GLRX3_HUMAN	GLRX3	GLRX3	Glutaredoxin-3	13	13	799234	723362	820113
	O76021	RL1D1_HUMAN	RSL1D1	RSL1D1	Ribosomal L1 domain-containing protein 1	15	15	277849	281357	259247
	O76024	WFS1_HUMAN	WFS1	WFS1	Wolframin	10	10	303417	262906	262625
	O76031	CLPX_HUMAN	CLPX	CLPX	ATP-dependent Clp protease ATP-binding subunit clpX-like, mitochondrial	22	22	129318	130703	121612
	O76041-2	NEBL_HUMAN	NEBL	NEBL	Isoform 2 of Nebulette	7	7	94436.3	74993.5	102323
	O76062	ERG24_HUMAN	TM7SF2	TM7SF2	Delta(14)-sterol reductase TM7SF2	5	5	36786.4	41909.9	34693.2
	O76070	SYUG_HUMAN	SNCG	SNCG	Gamma-synuclein	7	6	113737	106190	129809
	O76071	CIAO1_HUMAN	CIAO1	CIAO1	Probable cytosolic iron-sulfur protein assembly protein CIAO1	11	11	232091	233062	262072
	O76074;O76074-2	PDE5A_HUMAN	PDE5A	PDE5A	cGMP-specific 3',5'-cyclic phosphodiesterase	4	4	7548.18	9002.75	5959.95
	O76080	ZFAN5_HUMAN	ZFAND5	ZFAND5	AN1-type zinc finger protein 5	6	6	121793	122157	152712
	O76083;O76083-11;O76083-12;O76083-13;O76083-14;O76083-15;O76083-16;O76083-2;O76083-3;O76083-4;O76083-5;O76083-6;O76083-8;O76083-9	PDE9A_HUMAN	PDE9A	PDE9A	High affinity cGMP-specific 3',5'-cyclic phosphodiesterase 9A	3	3	8457.05	9302.57	13642.2
	O76094	SRP72_HUMAN	SRP72	SRP72	Signal recognition particle subunit SRP72	25	25	275568	293959	271422
	O76095;O76095-2	JTB_HUMAN	JTB	JTB	Protein JTB	1	1	24197.9	15468.6
	O77932	DXO_HUMAN	DXO	DXO	Decapping and exoribonuclease protein	2	2	13308.5	15366.9	17894.7
	O94760	DDAH1_HUMAN	DDAH1	DDAH1	N(G),N(G)-dimethylarginine dimethylaminohydrolase 1	11	10	163891	136464	222251
	O94761	RECQ4_HUMAN	RECQL4	RECQL4	ATP-dependent DNA helicase Q4	10	10	18215.9	18065.3	11762.2
	O94762	RECQ5_HUMAN	RECQL5	RECQL5	ATP-dependent DNA helicase Q5	11	11	41208.9	38120.7	34149.8
	O94763	RMP_HUMAN	URI1	URI1	Unconventional prefoldin RPB5 interactor 1	16	16	71548.8	75391.3	85243.1
	O94763-4	RMP_HUMAN	URI1	URI1	Isoform 4 of Unconventional prefoldin RPB5 interactor 1	1	1	7669.68		7722.81
	O94766	B3GA3_HUMAN	B3GAT3	B3GAT3	Galactosylgalactosylxylosylprotein 3-beta-glucuronosyltransferase 3	7	7	123738	108357	109301
	O94768	ST17B_HUMAN	STK17B	STK17B	Serine/threonine-protein kinase 17B	2	2	8540.74	6491.54	6660.78
	O94772;O94772-2	LY6H_HUMAN	LY6H	LY6H	Lymphocyte antigen 6H	1	1			19843
	O94776	MTA2_HUMAN	MTA2	MTA2	Metastasis-associated protein MTA2	26	22	335408	350283	376891
	O94782	UBP1_HUMAN	USP1	USP1	Ubiquitin carboxyl-terminal hydrolase 1	16	16	56488.4	55343	57546.8
	O94788	AL1A2_HUMAN	ALDH1A2	ALDH1A2	Retinal dehydrogenase 2	12	11	89785.9	93460.9	90301.1
	O94804	STK10_HUMAN	STK10	STK10	Serine/threonine-protein kinase 10	15	15	60154.2	59227.2	63488.5
	O94805	ACL6B_HUMAN	ACTL6B	ACTL6B	Actin-like protein 6B	1	1	8884.93	9994.81	10660.1
	O94806	KPCD3_HUMAN	PRKD3	PRKD3	Serine/threonine-protein kinase D3	3	3	8985.98	7222.21	6531.98
	O94808	GFPT2_HUMAN	GFPT2	GFPT2	Glutamine--fructose-6-phosphate aminotransferase [isomerizing] 2	21	21	126667	123306	126074
	O94811	TPPP_HUMAN	TPPP	TPPP	Tubulin polymerization-promoting protein	2	2	13442.8	11994	11919.3
	O94813	SLIT2_HUMAN	SLIT2	SLIT2	Slit homolog 2 protein	13	12	42159.9	41319.2	45459.7
	O94817	ATG12_HUMAN	ATG12	ATG12	Ubiquitin-like protein ATG12	3	3	45686.5	38437.1	44008.7
	O94819	KBTBB_HUMAN	KBTBD11	KBTBD11	Kelch repeat and BTB domain-containing protein 11	3	3	9924.47	9528.88	11478.3
	O94822;O94822-3	LTN1_HUMAN	LTN1	LTN1	E3 ubiquitin-protein ligase listerin	32	32	62696.4	61196.6	54473.2
	O94826	TOM70_HUMAN	TOMM70	TOMM70	Mitochondrial import receptor subunit TOM70	20	20	255641	258271	223789
	O94829	IPO13_HUMAN	IPO13	IPO13	Importin-13	14	14	37078.3	37921.2	36772.2
	O94830	DDHD2_HUMAN	DDHD2	DDHD2	Triacylglycerol hydrolase DDHD2	9	9	63444.7	63811.4	69929.6
	O94832	MYO1D_HUMAN	MYO1D	MYO1D	Unconventional myosin-Id	22	22	71628.9	63368.7	68929.4
	O94842;O94842-2;O94842-3	TOX4_HUMAN	TOX4	TOX4	TOX high mobility group box family member 4	10	7	182026	164743	183613
	O94854	K0754_HUMAN	MACF1	MACF1	Microtubule-actin cross-linking factor 1, isoforms 6/7	11	11	21482.6	21372.8	18430.3
	O94855;O94855-2	SC24D_HUMAN	SEC24D	SEC24D	Protein transport protein Sec24D	24	24	121083	132896	141291
	O94864;O94864-2	ST65G_HUMAN	SUPT7L	SUPT7L	STAGA complex 65 subunit gamma	8	8	50288.2	64274.3	56683.2
	O94868;O94868-2	FCSD2_HUMAN	FCHSD2	FCHSD2	F-BAR and double SH3 domains protein 2	5	5	14840.4	16442	15891.1
	O94874	UFL1_HUMAN	UFL1	UFL1	E3 UFM1-protein ligase 1	31	30	130869	128987	124540
	O94875-11;O94875-12;O94875-9	SRBS2_HUMAN	SORBS2	SORBS2	Isoform 11 of Sorbin and SH3 domain-containing protein 2	18	18	244770	227891	218394
	O94876	TMCC1_HUMAN	TMCC1	TMCC1	Transmembrane and coiled-coil domains protein 1	2	2	6104.9	6070.89	6753.94
	O94880	PHF14_HUMAN	PHF14	PHF14	PHD finger protein 14	19	19	84375	93014	74636.2
	O94885	SASH1_HUMAN	SASH1	SASH1	SAM and SH3 domain-containing protein 1	14	13	33236	32235.4	33313.1
	O94887	FARP2_HUMAN	FARP2	FARP2	FERM, ARHGEF and pleckstrin domain-containing protein 2	8	8	21125.3	21370.1	19512.7
	O94888	UBXN7_HUMAN	UBXN7	UBXN7	UBX domain-containing protein 7	14	14	169905	161948	192548
	O94889;O94889-2	KLH18_HUMAN	KLHL18	KLHL18	Kelch-like protein 18	1	1		7598.56
	O94892	ZN432_HUMAN	ZNF432	ZNF432	Zinc finger protein 432	1	0		15091.3
	O94898	LRIG2_HUMAN	LRIG2	LRIG2	Leucine-rich repeats and immunoglobulin-like domains protein 2	9	9	15511.5	14538.2	14220
	O94901-9	SUN1_HUMAN	SUN1	SUN1	Isoform 8 of SUN domain-containing protein 1	15	15	134998	124806	103796
	O94903	PLPHP_HUMAN	PLPBP	PLPBP	Pyridoxal phosphate homeostasis protein	12	12	254603	259110	283762
	O94905	ERLN2_HUMAN	ERLIN2	ERLIN2	Erlin-2	14	11	360451	326189	306308
	O94906	PRP6_HUMAN	PRPF6	PRPF6	Pre-mRNA-processing factor 6	37	37	282179	280868	304622
	O94907	DKK1_HUMAN	DKK1	DKK1	Dickkopf-related protein 1	2	1	21146.7	22627.9	22713.1
	O94910;O94910-2	AGRL1_HUMAN	ADGRL1	ADGRL1	Adhesion G protein-coupled receptor L1	2	2		2310.79	5151.66
	O94913	PCF11_HUMAN	PCF11	PCF11	Pre-mRNA cleavage complex 2 protein Pcf11	27	27	42257.8	39128.3	38307.6
	O94916-4	NFAT5_HUMAN	NFAT5	NFAT5	Isoform D of Nuclear factor of activated T-cells 5	1	1	7429.2	9002.42	7241.59
	O94916;O94916-2;O94916-5	NFAT5_HUMAN	NFAT5	NFAT5	Nuclear factor of activated T-cells 5	5	5	26250.8	25454.4	13130.7
	O94919	ENDD1_HUMAN	ENDOD1	ENDOD1	Endonuclease domain-containing 1 protein	5	5	40002.9	47639	45119.9
	O94921	CDK14_HUMAN	CDK14	CDK14	Cyclin-dependent kinase 14	6	5	31069.8	33590	25562.7
	O94923	GLCE_HUMAN	GLCE	GLCE	D-glucuronyl C5-epimerase	1	1	4010.89	4134.78
	O94925	GLSK_HUMAN	GLS	GLS	Glutaminase kidney isoform, mitochondrial	17	17	190130	213936	223626
	O94925-3	GLSK_HUMAN	GLS	GLS	Isoform 3 of Glutaminase kidney isoform, mitochondrial	2	2	216471	189704	144215
	O94927	HAUS5_HUMAN	HAUS5	HAUS5	HAUS augmin-like complex subunit 5	16	16	115926	115874	119964
	O94941;O94941-2	RNF37_HUMAN	UBOX5	UBOX5	RING finger protein 37	4	4	15377.2	13816.7	12779.3
	O94952;O94952-1	FBX21_HUMAN	FBXO21	FBXO21	F-box only protein 21	3	3	82037.4	91108.4	93329.1
	O94955	RHBT3_HUMAN	RHOBTB3	RHOBTB3	Rho-related BTB domain-containing protein 3	7	7	57279.1	49361.2	41043
	O94964	MTCL2_HUMAN	MTCL2	MTCL2	Microtubule cross-linking factor 2	32	31	57270.3	54976.8	49136
	O94966-5	UBP19_HUMAN	USP19	USP19	Isoform 5 of Ubiquitin carboxyl-terminal hydrolase 19	21	21	45708.4	42718.5	43176.9
	O94967;O94967-2;O94967-3;O94967-4	WDR47_HUMAN	WDR47	WDR47	WD repeat-containing protein 47	7	7	23866.8	18106.4	22117.1
	O94973	AP2A2_HUMAN	AP2A2	AP2A2	AP-2 complex subunit alpha-2	26	26	86857.9	89464.8	88542.7
	O94973-2	AP2A2_HUMAN	AP2A2	AP2A2	Isoform 2 of AP-2 complex subunit alpha-2	1	1	279527	229146	213211
	O94985;O94985-2	CSTN1_HUMAN	CLSTN1	CLSTN1	Calsyntenin-1	4	4	35096.3	32914.4	34161.3
	O94986;O94986-2;O94986-3	CE152_HUMAN	CEP152	CEP152	Centrosomal protein of 152 kDa	6	6	12243.8	8566.05	10537.2
	O94988;O94988-1;O94988-3;O94988-5;O94988-6	FA13A_HUMAN	FAM13A	FAM13A	Protein FAM13A	2	2	1347.9		2305.52
	O94991	SLIK5_HUMAN	SLITRK5	SLITRK5	SLIT and NTRK-like protein 5	1	0		2136	2537.35
	O94992	HEXI1_HUMAN	HEXIM1	HEXIM1	Protein HEXIM1	9	8	406803	361756	422120
	O95059	RPP14_HUMAN	RPP14	RPP14	Ribonuclease P protein subunit p14	3	3	42429	43541.9	47461.8
	O95067	CCNB2_HUMAN	CCNB2	CCNB2	G2/mitotic-specific cyclin-B2	10	10	60552.7	65932.5	56826
	O95070	YIF1A_HUMAN	YIF1A	YIF1A	Protein YIF1A	3	3	12858.9	13219.5	9973.05
	O95071;O95071-2	UBR5_HUMAN	UBR5	UBR5	E3 ubiquitin-protein ligase UBR5	52	52	197448	211073	226378
	O95073	FSBP_HUMAN	FSBP	FSBP	Fibrinogen silencer-binding protein	1	1	4469.67	4633.38	4216.86
	O95081	AGFG2_HUMAN	AGFG2	AGFG2	Arf-GAP domain and FG repeat-containing protein 2	2	2	77998.3	77871.2	69936.3
	O95084	PRS23_HUMAN	PRSS23	PRSS23	Serine protease 23	3	3	7081.98	5301.45	4227.77
	O95104	SCAF4_HUMAN	SCAF4	SCAF4	SR-related and CTD-associated factor 4	12	12	117210	120706	148918
	O95136	S1PR2_HUMAN	S1PR2	S1PR2	Sphingosine 1-phosphate receptor 2	1	1	28884.2	20731.1	21848.7
	O95139	NDUB6_HUMAN	NDUFB6	NDUFB6	NADH dehydrogenase [ubiquinone] 1 beta subcomplex subunit 6	5	5	44446.6	30596.4	48075.9
	O95140	MFN2_HUMAN	MFN2	MFN2	Mitofusin-2	15	14	148040	169327	143408
	O95149	SPN1_HUMAN	SNUPN	SNUPN	Snurportin-1	5	5	81620	72199.3	80896.2
	O95155;O95155-2;O95155-4	UBE4B_HUMAN	UBE4B	UBE4B	Ubiquitin conjugation factor E4 B	29	29	188766	197061	189661
	O95159	ZFPL1_HUMAN	ZFPL1	ZFPL1	Zinc finger protein-like 1	6	6	36018	41826	29692
	O95163	ELP1_HUMAN	ELP1	ELP1	Elongator complex protein 1	44	44	93078.5	89162.2	97641.1
	O95164	UBL3_HUMAN	UBL3	UBL3	Ubiquitin-like protein 3	1	1	15026.1	11887.7	9599.98
	O95166	GBRAP_HUMAN	GABARAP	GABARAP	Gamma-aminobutyric acid receptor-associated protein	2	2	93156.7	105893	116950
	O95167	NDUA3_HUMAN	NDUFA3	NDUFA3	NADH dehydrogenase [ubiquinone] 1 alpha subcomplex subunit 3	1	1	27415.4	16467.4
	O95168;O95168-2	NDUB4_HUMAN	NDUFB4	NDUFB4	NADH dehydrogenase [ubiquinone] 1 beta subcomplex subunit 4	3	3	65595.6	61969.8	74607.6
	O95169;O95169-3	NDUB8_HUMAN	NDUFB8	NDUFB8	NADH dehydrogenase [ubiquinone] 1 beta subcomplex subunit 8, mitochondrial	4	4	140103	143258	122465
	O95178	NDUB2_HUMAN	NDUFB2	NDUFB2	NADH dehydrogenase [ubiquinone] 1 beta subcomplex subunit 2, mitochondrial	2	2	59870.7	57536.5	52883.8
	O95182	NDUA7_HUMAN	NDUFA7	NDUFA7	NADH dehydrogenase [ubiquinone] 1 alpha subcomplex subunit 7	7	7	80227.2	106904	117227
	O95183	VAMP5_HUMAN	VAMP5	VAMP5	Vesicle-associated membrane protein 5	3	3	66061.1	113219	117339
	O95185	UNC5C_HUMAN	UNC5C	UNC5C	Netrin receptor UNC5C	14	13	103747	101226	88215
	O95197-5;O95197-6	RTN3_HUMAN	RTN3	RTN3	Isoform 5 of Reticulon-3	1	1	28099.1	29408.1	21348.4
	O95197;O95197-2;O95197-7	RTN3_HUMAN	RTN3	RTN3	Reticulon-3	8	8	360117	343053	339442
	O95199;O95199-2	RCBT2_HUMAN	RCBTB2	RCBTB2	RCC1 and BTB domain-containing protein 2	6	6	75340.7	67933.9	57326.6
	O95201	RHIT_HUMAN	ZNF205	ZNF205	Transcriptional repressor RHIT	1	1			2819.67
	O95202	LETM1_HUMAN	LETM1	LETM1	Mitochondrial proton/calcium exchanger protein	27	27	383408	369775	323909
	O95208;O95208-2	EPN2_HUMAN	EPN2	EPN2	Epsin-2	13	11	57303.9	60092.9	72440.7
	O95218;O95218-2	ZRAB2_HUMAN	ZRANB2	ZRANB2	Zinc finger Ran-binding domain-containing protein 2	10	10	372313	364226	493488
	O95219	SNX4_HUMAN	SNX4	SNX4	Sorting nexin-4	15	15	77885.6	76100.8	87104.6
	O95229	ZWINT_HUMAN	ZWINT	ZWINT	Outer kinetochore KNL1 complex subunit ZWINT	9	9	1.118e+06	1.1496e+06	1.2593e+06
	O95232	LC7L3_HUMAN	LUC7L3	LUC7L3	Luc7-like protein 3	15	15	367980	367517	391908
	O95235;O95235-2	KI20A_HUMAN	KIF20A	KIF20A	Kinesin-like protein KIF20A	26	26	117638	107357	91659.3
	O95239	KIF4A_HUMAN	KIF4A	KIF4A	Chromosome-associated kinesin KIF4A	41	26	182065	190148	189608
	O95243;O95243-2;O95243-5	MBD4_HUMAN	MBD4	MBD4	Methyl-CpG-binding domain protein 4	12	12	26200.6	29733.3	24477.4
	O95248;O95248-4;O95248-5	MTMR5_HUMAN	SBF1	SBF1	Myotubularin-related protein 5	25	23	51965.9	55982.7	55039.8
	O95249	GOSR1_HUMAN	GOSR1	GOSR1	Golgi SNAP receptor complex member 1	7	7	43620.2	41731.3	43018.7
	O95251;O95251-4	KAT7_HUMAN	KAT7	KAT7	Histone acetyltransferase KAT7	18	17	105508	88647.6	80474.7
	O95258;O95258-2;O95258-3	UCP5_HUMAN	SLC25A14	SLC25A14	Brain mitochondrial carrier protein 1	2	2	5651.82	5133.23
	O95271	TNKS1_HUMAN	TNKS	TNKS	Poly [ADP-ribose] polymerase tankyrase-1	4	2	10562.2	8706.83	9842.94
	O95273;O95273-2	CCDB1_HUMAN	CCNDBP1	CCNDBP1	Cyclin-D1-binding protein 1	4	3	43669	39785.6	41690.3
	O95292	VAPB_HUMAN	VAPB	VAPB	Vesicle-associated membrane protein-associated protein B/C	11	10	1.06524e+06	990850	1.07907e+06
	O95295	SNAPN_HUMAN	SNAPIN	SNAPIN	SNARE-associated protein Snapin	3	3	86176.4	85827.3	112434
	O95297;O95297-2	MPZL1_HUMAN	MPZL1	MPZL1	Myelin protein zero-like protein 1	9	9	119363	126123	121287
	O95298	NDUC2_HUMAN	NDUFC2	NDUFC2	NADH dehydrogenase [ubiquinone] 1 subunit C2	6	3	106557	106793	123194
	O95299	NDUAA_HUMAN	NDUFA10	NDUFA10	NADH dehydrogenase [ubiquinone] 1 alpha subcomplex subunit 10, mitochondrial	12	12	155744	147688	124139
	O95302	FKBP9_HUMAN	FKBP9	FKBP9	Peptidyl-prolyl cis-trans isomerase FKBP9	13	11	330003	347805	374284
	O95319;O95319-2;O95319-3;O95319-4;O95319-5	CELF2_HUMAN	CELF2	CELF2	CUGBP Elav-like family member 2	1	1	26721	21993.6
	O95336	6PGL_HUMAN	PGLS	PGLS	6-phosphogluconolactonase	11	11	343486	336711	430017
	O95340;O95340-2	PAPS2_HUMAN	PAPSS2	PAPSS2	Bifunctional 3'-phosphoadenosine 5'-phosphosulfate synthase 2	16	16	58254.2	53910.9	66907.7
	O95347	SMC2_HUMAN	SMC2	SMC2	Structural maintenance of chromosomes protein 2	56	56	192410	202568	228785
	O95352	ATG7_HUMAN	ATG7	ATG7	Ubiquitin-like modifier-activating enzyme ATG7	16	16	80216.6	79851	88768.4
	O95359;O95359-3	TACC2_HUMAN	TACC2	TACC2	Transforming acidic coiled-coil-containing protein 2	18	16	44009.9	43911.9	45923.3
	O95361	TRI16_HUMAN	TRIM16	TRIM16	Tripartite motif-containing protein 16	10	7	48756.7	56132.5	69408.5
	O95363	SYFM_HUMAN	FARS2	FARS2	Phenylalanine--tRNA ligase, mitochondrial	9	9	56437.8	53088	48289.5
	O95372	LYPA2_HUMAN	LYPLA2	LYPLA2	Acyl-protein thioesterase 2	8	8	346516	433522	466933
	O95373	IPO7_HUMAN	IPO7	IPO7	Importin-7	30	29	551887	555450	582460
	O95376	ARI2_HUMAN	ARIH2	ARIH2	E3 ubiquitin-protein ligase ARIH2	14	14	108646	108158	110196
	O95379	TFIP8_HUMAN	TNFAIP8	TNFAIP8	Tumor necrosis factor alpha-induced protein 8	6	6	54179.6	68382.6	76388
	O95382;O95382-3;O95382-2	M3K6_HUMAN	MAP3K6	MAP3K6	Mitogen-activated protein kinase kinase kinase 6	1	1	5517.24	4465.03
	O95391	SLU7_HUMAN	SLU7	SLU7	Pre-mRNA-splicing factor SLU7	14	14	65724.6	67646.3	61821
	O95394;O95394-3;O95394-4	AGM1_HUMAN	PGM3	PGM3	Phosphoacetylglucosamine mutase	21	21	194962	208699	227333
	O95396	MOCS3_HUMAN	MOCS3	MOCS3	Adenylyltransferase and sulfurtransferase MOCS3	11	11	46009.9	42773.8	48175.3
	O95400	CD2B2_HUMAN	CD2BP2	CD2BP2	CD2 antigen cytoplasmic tail-binding protein 2	8	8	828861	795003	1.0203e+06
	O95402	MED26_HUMAN	MED26	MED26	Mediator of RNA polymerase II transcription subunit 26	8	8	89159.5	112838	96755.2
	O95405	ZFYV9_HUMAN	ZFYVE9	ZFYVE9	Zinc finger FYVE domain-containing protein 9	10	10	31561.7	36211.1	36003.3
	O95409	ZIC2_HUMAN	ZIC2	ZIC2	Zinc finger protein ZIC 2	6	4	118327	103750	104335
	O95425-4	SVIL_HUMAN	SVIL	SVIL	Isoform SV4 of Supervillin	38	38	282947	280149	259632
	O95427	PIGN_HUMAN	PIGN	PIGN	GPI ethanolamine phosphate transferase 1	1	1		5129.11
	O95429;O95429-2	BAG4_HUMAN	BAG4	BAG4	BAG family molecular chaperone regulator 4	9	9	212393	203894	205153
	O95433	AHSA1_HUMAN	AHSA1	AHSA1	Activator of 90 kDa heat shock protein ATPase homolog 1	21	21	458009	536951	603361
	O95453;O95453-2	PARN_HUMAN	PARN	PARN	Poly(A)-specific ribonuclease PARN	22	22	614649	592127	568847
	O95456;O95456-2	PSMG1_HUMAN	PSMG1	PSMG1	Proteasome assembly chaperone 1	9	9	191246	203932	225767
	O95461;O95461-2	LARG1_HUMAN	LARGE1	LARGE1	Xylosyl- and glucuronyltransferase LARGE1	2	2	8803.92	8427.78	9466.22
	O95470	SGPL1_HUMAN	SGPL1	SGPL1	Sphingosine-1-phosphate lyase 1	13	13	218114	178244	165121
	O95476	CNEP1_HUMAN	CTDNEP1	CTDNEP1	CTD nuclear envelope phosphatase 1	2	2	20056.7	17591.2	18031.5
	O95478	NSA2_HUMAN	NSA2	NSA2	Ribosome biogenesis protein NSA2 homolog	6	6	97632.9	85237.8	80408.3
	O95479;O95479-2	G6PE_HUMAN	H6PD	H6PD	GDH/6PGL endoplasmic bifunctional protein	13	13	31830.3	29545	30458.9
	O95486	SC24A_HUMAN	SEC24A	SEC24A	Protein transport protein Sec24A	20	19	92091	88136.5	93920
	O95487;O95487-2;O95487-3	SC24B_HUMAN	SEC24B	SEC24B	Protein transport protein Sec24B	17	17	59218.4	49988.3	49397.3
	O95490;O95490-2;O95490-5;O95490-6;O95490-7	AGRL2_HUMAN	ADGRL2	ADGRL2	Adhesion G protein-coupled receptor L2	24	23	104498	96403.3	88786.1
	O95528	GTR10_HUMAN	SLC2A10	SLC2A10	Solute carrier family 2, facilitated glucose transporter member 10	3	3	17456.6	15617.9	16818.5
	O95544	NADK_HUMAN	NADK	NADK	NAD kinase	5	5	45728.6	40157.7	44191.5
	O95551;O95551-2	TYDP2_HUMAN	TDP2	TDP2	Tyrosyl-DNA phosphodiesterase 2	8	8	206962	197066	228764
	O95562	SFT2B_HUMAN	SFT2D2	SFT2D2	Vesicle transport protein SFT2B	1	1	80457.2	68984.7	69025.8
	O95563	MPC2_HUMAN	MPC2	MPC2	Mitochondrial pyruvate carrier 2	2	2	13578.3	12897	10105.8
	O95568	MET18_HUMAN	METTL18	METTL18	Histidine protein methyltransferase 1 homolog	5	5	13657.9	13403.7	15179.6
	O95571	ETHE1_HUMAN	ETHE1	ETHE1	Persulfide dioxygenase ETHE1, mitochondrial	7	7	71373	71700.4	76920.6
	O95573	ACSL3_HUMAN	ACSL3	ACSL3	Fatty acid CoA ligase Acsl3	25	22	224875	219043	192228
	O95602	RPA1_HUMAN	POLR1A	POLR1A	DNA-directed RNA polymerase I subunit RPA1	46	45	235038	225766	240809
	O95613	PCNT_HUMAN	PCNT	PCNT	Pericentrin	44	44	153260	151019	129569
	O95619	YETS4_HUMAN	YEATS4	YEATS4	YEATS domain-containing protein 4	5	5	59989.2	65940	62109.2
	O95625	ZBT11_HUMAN	ZBTB11	ZBTB11	Zinc finger and BTB domain-containing protein 11	8	8	146283	191746	167374
	O95628-8;O95628-9	CNOT4_HUMAN	CNOT4	CNOT4	Isoform 8 of CCR4-NOT transcription complex subunit 4	12	12	63199.5	49315.5	55621.5
	O95630	STABP_HUMAN	STAMBP	STAMBP	STAM-binding protein	13	13	81462.6	85531.7	90819.7
	O95639	CPSF4_HUMAN	CPSF4	CPSF4	Cleavage and polyadenylation specificity factor subunit 4	9	8	91176.6	87354.4	83803.3
	O95644;O95644-4;O95644-5;O95644-6	NFAC1_HUMAN	NFATC1	NFATC1	Nuclear factor of activated T-cells, cytoplasmic 1	9	9	23227.3	18253.9	19641.3
	O95671	ASML_HUMAN	ASMTL	ASMTL	Probable bifunctional dTTP/UTP pyrophosphatase/methyltransferase protein	19	19	67821.1	69096.1	69531.5
	O95674	CDS2_HUMAN	CDS2	CDS2	Phosphatidate cytidylyltransferase 2	4	4	47709.7	44003.1	39210.6
	O95684;O95684-2	CEP43_HUMAN	CEP43	CEP43	Centrosomal protein 43	11	10	135419	129177	133806
	O95685	PPR3D_HUMAN	PPP1R3D	PPP1R3D	Protein phosphatase 1 regulatory subunit 3D	2	2	18384.4	13566.5	21561.9
	O95696-2	BRD1_HUMAN	BRD1	BRD1	Isoform 2 of Bromodomain-containing protein 1	19	18	46670.5	51128.1	41973.3
	O95707	RPP29_HUMAN	POP4	POP4	Ribonuclease P protein subunit p29	6	6	57377.2	47459.5	52844.1
	O95714	HERC2_HUMAN	HERC2	HERC2	E3 ubiquitin-protein ligase HERC2	45	37	125172	130884	128505
	O95716	RAB3D_HUMAN	RAB3D	RAB3D	Ras-related protein Rab-3D	7	3	264072	234184	259005
	O95721	SNP29_HUMAN	SNAP29	SNAP29	Synaptosomal-associated protein 29	9	9	179165	194107	235173
	O95747	OXSR1_HUMAN	OXSR1	OXSR1	Serine/threonine-protein kinase OSR1	16	12	337193	274206	326792
	O95749	GGPPS_HUMAN	GGPS1	GGPS1	Geranylgeranyl pyrophosphate synthase	10	10	77812.1	64049.2	75631.1
	O95757	HS74L_HUMAN	HSPA4L	HSPA4L	Heat shock 70 kDa protein 4L	16	16	58745.7	53850.6	61607.9
	O95758;O95758-1;O95758-2;O95758-4;O95758-5;O95758-6	PTBP3_HUMAN	PTBP3	PTBP3	Polypyrimidine tract-binding protein 3	7	7	207060	199777	185547
	O95772;O95772-2	STR3N_HUMAN	STARD3NL	STARD3NL	STARD3 N-terminal-like protein	3	3	261701	284139	258691
	O95777	LSM8_HUMAN	LSM8	LSM8	U6 snRNA-associated Sm-like protein LSm8	6	6	403676	369449	451065
	O95782;O95782-2	AP2A1_HUMAN	AP2A1	AP2A1	AP-2 complex subunit alpha-1	41	32	258744	270015	285594
	O95785-3	WIZ_HUMAN	WIZ	WIZ	Isoform 3 of Protein Wiz	22	22	83838.6	78383.5	76371.2
	O95786;O95786-2	RIGI_HUMAN	RIGI	RIGI	Antiviral innate immune response receptor RIG-I	1	0	6146.79
	O95793-3	STAU1_HUMAN	STAU1	STAU1	Isoform 3 of Double-stranded RNA-binding protein Staufen homolog 1	23	21	337438	338485	393158
	O95801	TTC4_HUMAN	TTC4	TTC4	Tetratricopeptide repeat protein 4	14	14	104550	113371	128029
	O95807	TM50A_HUMAN	TMEM50A	TMEM50A	Transmembrane protein 50A	3	3	14701.9	17068.3	14641.9
	O95816	BAG2_HUMAN	BAG2	BAG2	BAG family molecular chaperone regulator 2	10	10	183084	198280	193682
	O95817	BAG3_HUMAN	BAG3	BAG3	BAG family molecular chaperone regulator 3	25	25	189716	167704	198619
	O95819-3	M4K4_HUMAN	MAP4K4	MAP4K4	Isoform 3 of Mitogen-activated protein kinase kinase kinase kinase 4	35	23	145983	148622	152164
	O95822;O95822-2	DCMC_HUMAN	MLYCD	MLYCD	Malonyl-CoA decarboxylase, mitochondrial	7	7	355318	297262	254140
	O95825	QORL1_HUMAN	CRYZL1	CRYZL1	Quinone oxidoreductase-like protein 1	9	9	85265.1	86266	83782.2
	O95831;O95831-3	AIFM1_HUMAN	AIFM1	AIFM1	Apoptosis-inducing factor 1, mitochondrial	19	19	254689	246257	205012
	O95835	LATS1_HUMAN	LATS1	LATS1	Serine/threonine-protein kinase LATS1	9	5	16159.5	15133.1	12818.4
	O95837	GNA14_HUMAN	GNA14	GNA14	Guanine nucleotide-binding protein subunit alpha-14	3	3	85855.7	114310
	O95848	NUD14_HUMAN	NUDT14	NUDT14	Uridine diphosphate glucose pyrophosphatase NUDT14	1	1	6527.52	4928.85	3924.08
	O95857	TSN13_HUMAN	TSPAN13	TSPAN13	Tetraspanin-13	3	2	6305.39	6383.26	4264.72
	O95861	BPNT1_HUMAN	BPNT1	BPNT1	3'(2'),5'-bisphosphate nucleotidase 1	13	13	72987.1	76786.1	88598
	O95863	SNAI1_HUMAN	SNAI1	SNAI1	Zinc finger protein SNAI1	3	3	30732.4	34151.9	46040
	O95864	FADS2_HUMAN	FADS2	FADS2	Acyl-CoA 6-desaturase	10	10	471761	456715	448153
	O95865	DDAH2_HUMAN	DDAH2	DDAH2	Putative hydrolase DDAH2	11	11	633498	639858	768622
	O95870;O95870-2	ABHGA_HUMAN	ABHD16A	ABHD16A	Phosphatidylserine lipase ABHD16A	9	9	184215	176024	151505
	O95872	GPAN1_HUMAN	GPANK1	GPANK1	G patch domain and ankyrin repeat-containing protein 1	2	2	2445.16		2808.03
	O95873	CF047_HUMAN	C6orf47	C6orf47	Uncharacterized protein C6orf47	3	3	17832.2	20403.7	23846.3
	O95881	TXD12_HUMAN	TXNDC12	TXNDC12	Thioredoxin domain-containing protein 12	7	7	724183	822869	931880
	O95897	NOE2_HUMAN	OLFM2	OLFM2	Noelin-2	3	3	18519.3	28857.4	24862
	O95900;O95900-2	TRUB2_HUMAN	TRUB2	TRUB2	Pseudouridylate synthase TRUB2, mitochondrial	1	1	21177.1	12906.9	15019.2
	O95905;O95905-3	ECD_HUMAN	ECD	ECD	Protein ecdysoneless homolog	11	11	45648.2	48096	45695.4
	O95926	SYF2_HUMAN	SYF2	SYF2	Pre-mRNA-splicing factor SYF2	12	12	106268	103398	113088
	O95935	TBX18_HUMAN	TBX18	TBX18	T-box transcription factor TBX18	5	4	16135.6	15403.9	17758.3
	O95967	FBLN4_HUMAN	EFEMP2	EFEMP2	EGF-containing fibulin-like extracellular matrix protein 2	2	2	40260.5	30584.7	29347.6
	O95980	RECK_HUMAN	RECK	RECK	Reversion-inducing cysteine-rich protein with Kazal motifs	3	3	34822.2	24902.2	23154.3
	O95983	MBD3_HUMAN	MBD3	MBD3	Methyl-CpG-binding domain protein 3	11	11	102638	144286	143820
	O95985	TOP3B_HUMAN	TOP3B	TOP3B	DNA topoisomerase 3-beta-1	12	12	557207	570408	600623
	O95989	NUDT3_HUMAN	NUDT3	NUDT3	Diphosphoinositol polyphosphate phosphohydrolase 1	8	3	260803	256361	317387
	O95997	PTTG1_HUMAN	PTTG1	PTTG1	Securin	4	1	77898.2	66961.1	87538.8
	O95999	BCL10_HUMAN	BCL10	BCL10	B-cell lymphoma/leukemia 10	9	9	73377.6	79847.9	89812.4
	O96000	NDUBA_HUMAN	NDUFB10	NDUFB10	NADH dehydrogenase [ubiquinone] 1 beta subcomplex subunit 10	6	6	1.68589e+06	1.96094e+06	1.54992e+06
	O96004	HAND1_HUMAN	HAND1	HAND1	Heart- and neural crest derivatives-expressed protein 1	2	2	44947.4	49082.9	45681.1
	O96005;O96005-4	CLPT1_HUMAN	CLPTM1	CLPTM1	Putative lipid scramblase CLPTM1	11	11	102909	116644	111887
	O96006	ZBED1_HUMAN	ZBED1	ZBED1	E3 SUMO-protein ligase ZBED1	11	11	39868.5	44385.9	43735.2
	O96007	MOC2B_HUMAN	MOCS2	MOCS2	Molybdopterin synthase catalytic subunit	5	5	174766	180754	133049
	O96008	TOM40_HUMAN	TOMM40	TOMM40	Mitochondrial import receptor subunit TOM40 homolog	7	7	361159	394110	346407
	O96011;O96011-2	PX11B_HUMAN	PEX11B	PEX11B	Peroxisomal membrane protein 11B	7	7	27384.9	26192.2	21562.6
	O96013	PAK4_HUMAN	PAK4	PAK4	Serine/threonine-protein kinase PAK 4	14	11	88828.8	89825.6	95513.7
	O96015	DNAL4_HUMAN	DNAL4	DNAL4	Dynein axonemal light chain 4	2	2	19732	19242.6
	O96017;O96017-9	CHK2_HUMAN	CHEK2	CHEK2	Serine/threonine-protein kinase Chk2	9	8	40649.4	41420.3	45294.6
	O96018	APBA3_HUMAN	APBA3	APBA3	Amyloid-beta A4 precursor protein-binding family A member 3	3	3	35009.6	32981.9	29794.2
	O96019	ACL6A_HUMAN	ACTL6A	ACTL6A	Actin-like protein 6A	15	12	493055	501861	478273
	O96028	NSD2_HUMAN	NSD2	NSD2	Histone-lysine N-methyltransferase NSD2	33	33	55209	57527	50553.6
	O96033	MOC2A_HUMAN	MOCS2	MOCS2	Molybdopterin synthase sulfur carrier subunit	4	4	41115.4	47206.9	73667.9
	P00156	CYB_HUMAN	MT-CYB	MT-CYB	Cytochrome b	2	2	45278.1	40825.1	29333.6
	P00167;P00167-2;cRAP-P00167	CYB5_HUMAN;cRAP-CYB5_HUMAN	CYB5A;cRAP-CYB5A	CYB5A	Cytochrome b5	5	0	704255	674472	582313
	P00326	ADH1G_HUMAN	ADH1C	ADH1C	Alcohol dehydrogenase 1C	2	1	12082.6
	P00338;P00338-3	LDHA_HUMAN	LDHA	LDHA	L-lactate dehydrogenase A chain	15	15	3.52256e+06	3.72876e+06	4.3018e+06
	P00367	DHE3_HUMAN	GLUD1	GLUD1	Glutamate dehydrogenase 1, mitochondrial	23	3	359735	380233	369010
	P00374	DYR_HUMAN	DHFR	DHFR	Dihydrofolate reductase	11	8	421247	451432	475574
	P00387;P00387-2;P00387-3	NB5R3_HUMAN	CYB5R3	CYB5R3	NADH-cytochrome b5 reductase 3	14	14	495312	557212	435749
	P00390;P00390-2	GSHR_HUMAN	GSR	GSR	Glutathione reductase, mitochondrial	15	15	181997	201730	214902
	P00395	COX1_HUMAN	MT-CO1	MT-CO1	Cytochrome c oxidase subunit 1	1	1	65518.6	68182	52841.2
	P00403	COX2_HUMAN	MT-CO2	MT-CO2	Cytochrome c oxidase subunit 2	5	5	405401	487979	564634
	P00414	COX3_HUMAN	MT-CO3	MT-CO3	Cytochrome c oxidase subunit 3	2	2	65675	51811.2	28441.7
	P00441;cRAP-P00441	SODC_HUMAN;cRAP-SODC_HUMAN	SOD1;cRAP-SOD1	SOD1	Superoxide dismutase [Cu-Zn]	6	0	3.29982e+06	3.11099e+06	3.05664e+06
	P00491	PNPH_HUMAN	PNP	PNP	Purine nucleoside phosphorylase	15	15	244806	291141	296652
	P00492	HPRT_HUMAN	HPRT1	HPRT1	Hypoxanthine-guanine phosphoribosyltransferase	10	10	277817	300940	327789
	P00505	AATM_HUMAN	GOT2	GOT2	Aspartate aminotransferase, mitochondrial	20	20	444358	455483	497139
	P00519;P00519-2	ABL1_HUMAN	ABL1	ABL1	Tyrosine-protein kinase ABL1	16	14	40302.7	44084.7	40874.2
	P00533	EGFR_HUMAN	EGFR	EGFR	Epidermal growth factor receptor	11	10	189086	188882	165679
	P00558	PGK1_HUMAN	PGK1	PGK1	Phosphoglycerate kinase 1	25	20	2.0625e+06	2.17872e+06	2.39284e+06
	P00568	KAD1_HUMAN	AK1	AK1	Adenylate kinase isoenzyme 1	12	11	275733	275172	298998
	P00749;P00749-2	UROK_HUMAN	PLAU	PLAU	Urokinase-type plasminogen activator	1	1	7781.36	8764.46	5688.29
	P00750;P00750-2;P00750-3	TPA_HUMAN	PLAT	PLAT	Tissue-type plasminogen activator	2	2	15736	16452.6	14022.4
	P00813	ADA_HUMAN	ADA	ADA	Adenosine deaminase	10	10	83707.9	74282.6	85303
	P00846	ATP6_HUMAN	MT-ATP6	MT-ATP6	ATP synthase subunit a	1	1	60008.3	89113.3	93831.4
	P00918;cRAP-P00918	CAH2_HUMAN;cRAP-CAH2_HUMAN	CA2;cRAP-CA2	CA2	Carbonic anhydrase 2	11	0	237478	232329	224448
	P00966	ASSY_HUMAN	ASS1	ASS1	Argininosuccinate synthase	12	12	61068.2	64586.2	70741.2
	P01008;cRAP-P01008	ANT3_HUMAN;cRAP-ANT3_HUMAN	SERPINC1;cRAP-SERPINC1	SERPINC1	Antithrombin-III	4	0	18615.4	14038.7	13190.6
	P01023	A2MG_HUMAN	A2M	A2M	Alpha-2-macroglobulin	3	3	18303.9	12449.7
	P01033	TIMP1_HUMAN	TIMP1	TIMP1	Metalloproteinase inhibitor 1	4	4	34251	35948.1	59067.8
	P01034	CYTC_HUMAN	CST3	CST3	Cystatin-C	2	2	11595.7	22236.3	25235
	P01036;P01037	CYTN_HUMAN;CYTS_HUMAN	CST1;CST4	CST1	Cystatin-S	1	0	46239.5	39005.9	50323.8
	P01111	RASN_HUMAN	NRAS	NRAS	GTPase NRas	3	2	122130	114455	155304
	P01112;cRAP-P01112	RASH_HUMAN;cRAP-RASH_HUMAN	HRAS;cRAP-HRAS	HRAS	GTPase HRas	2	0	40183.9	47258.6	41286.3
	P01116	RASK_HUMAN	KRAS	KRAS	GTPase KRas	5	2	222982	223210	312701
	P01116-2	RASK_HUMAN	KRAS	KRAS	Isoform 2B of GTPase KRas	1	1	135901	98094.9	98035.2
	P01130;P01130-2;P01130-3	LDLR_HUMAN	LDLR	LDLR	Low-density lipoprotein receptor	16	15	134907	137710	138677
	P01137	TGFB1_HUMAN	TGFB1	TGFB1	Transforming growth factor beta-1 proprotein	7	7	18248.5	18437.8	27077.3
	P02042;P68871;cRAP-P68871	HBB_HUMAN;HBD_HUMAN;cRAP-HBB_HUMAN	HBB;HBD;cRAP-HBB	HBB	Hemoglobin subunit delta	2	0	53709.9		11904.8
	P02452	CO1A1_HUMAN	COL1A1	COL1A1	Collagen alpha-1(I) chain	13	13	140247	120086	127840
	P02458;P02458-1	CO2A1_HUMAN	COL2A1	COL2A1	Collagen alpha-1(II) chain	8	8	55371.8	57966.3	65857.3
	P02461	CO3A1_HUMAN	COL3A1	COL3A1	Collagen alpha-1(III) chain	4	4	22883.8	24167.4	25618.6
	P02462	CO4A1_HUMAN	COL4A1	COL4A1	Collagen alpha-1(IV) chain	4	2	67236.9	57343.5	47884.1
	P02511	CRYAB_HUMAN	CRYAB	CRYAB	Alpha-crystallin B chain	1	1	3350.8	4298.09	4392.43
	P02545	LMNA_HUMAN	LMNA	LMNA	Prelamin-A/C	42	41	1.93913e+06	1.92181e+06	1.89562e+06
	P02649	APOE_HUMAN	APOE	APOE	Apolipoprotein E	17	17	279730	235582	291656
	P02654	APOC1_HUMAN	APOC1	APOC1	Apolipoprotein C-I	2	2	42398.6	71445.4	118233
	P02656	APOC3_HUMAN	APOC3	APOC3	Apolipoprotein C-III	1	1	1.5475e+06	852774	1.31991e+06
	P02686;P02686-3;P02686-4;P02686-5;P02686-6	MBP_HUMAN	MBP	MBP	Myelin basic protein	2	2	18642.4
	P02751-1;P02751-3	FINC_HUMAN	FN1	FN1	Isoform 1 of Fibronectin	60	60	1.27423e+06	1.2876e+06	1.21193e+06
	P02786	TFR1_HUMAN	TFRC	TFRC	Transferrin receptor protein 1	27	26	152328	151241	149414
	P02787;cRAP-P02787	TRFE_HUMAN;cRAP-TRFE_HUMAN	TF;cRAP-TF	TF	Serotransferrin	24	0	116949	142239	123596
	P02792	FRIL_HUMAN	FTL	FTL	Ferritin light chain	7	7	1.46443e+06	1.41275e+06	1.54107e+06
	P02794	FRIH_HUMAN	FTH1	FTH1	Ferritin heavy chain	12	12	1.77247e+06	1.67576e+06	1.6227e+06
	P02795;P13640;P13640-2;P80297	MT1G_HUMAN;MT1X_HUMAN;MT2_HUMAN	MT1G;MT1X;MT2A	MT1G	Metallothionein-2	2	0	17133.5	21915.6	17573.6
	P03891	NU2M_HUMAN	MT-ND2	MT-ND2	NADH-ubiquinone oxidoreductase chain 2	1	1		80717.8	76617.6
	P03905	NU4M_HUMAN	MT-ND4	MT-ND4	NADH-ubiquinone oxidoreductase chain 4	3	3	25628.7	26036.5	21144.9
	P03915	NU5M_HUMAN	MT-ND5	MT-ND5	NADH-ubiquinone oxidoreductase chain 5	2	2	5246.95	6758.98	6387.68
	P03928	ATP8_HUMAN	MT-ATP8	MT-ATP8	ATP synthase protein 8	2	2	159823	142805	154766
	P04035;P04035-3	HMDH_HUMAN	HMGCR	HMGCR	3-hydroxy-3-methylglutaryl-coenzyme A reductase	17	17	116397	105802	95910.9
	P04040;cRAP-P04040	CATA_HUMAN;cRAP-CATA_HUMAN	CAT;cRAP-CAT	CAT	Catalase	21	0	382007	363456	270397
Yes	P04049;P04049-2	RAF1_HUMAN	RAF1	RAF1	RAF proto-oncogene serine/threonine-protein kinase	14	8	105605	96146.4	86471.3
	P04062;P04062-2;P04062-4	GBA1_HUMAN	GBA1	GBA1	Lysosomal acid glucosylceramidase	12	12	92870.2	85564.4	97557.1
	P04066	FUCO_HUMAN	FUCA1	FUCA1	Tissue alpha-L-fucosidase	2	2	14454.1	13279.8	13405.5
	P04075	ALDOA_HUMAN	ALDOA	ALDOA	Fructose-bisphosphate aldolase A	23	5	4.28389e+06	4.09556e+06	4.83728e+06
	P04080	CYTB_HUMAN	CSTB	CSTB	Cystatin-B	5	5	1.30928e+06	1.2259e+06	1.37353e+06
	P04083	ANXA1_HUMAN	ANXA1	ANXA1	Annexin A1	21	21	899415	907173	1.03937e+06
	P04150;P04150-10;P04150-2;P04150-3;P04150-5;P04150-6;P04150-7;P04150-8;P04150-9	GCR_HUMAN	NR3C1	NR3C1	Glucocorticoid receptor	3	3	12420.8	9378.94	14395.1
	P04156	PRIO_HUMAN	PRNP	PRNP	Major prion protein	2	2	30978	40314.2	37512.4
	P04179	SODM_HUMAN	SOD2	SOD2	Superoxide dismutase [Mn], mitochondrial	10	10	284677	256148	350427
	P04181	OAT_HUMAN	OAT	OAT	Ornithine aminotransferase, mitochondrial	17	17	491294	512925	493323
	P04183	KITH_HUMAN	TK1	TK1	Thymidine kinase, cytosolic	10	10	79311.7	83572.5	90219.7
	P04198	MYCN_HUMAN	MYCN	MYCN	N-myc proto-oncogene protein	2	2	12495	10499.4	9921.02
	P04216	THY1_HUMAN	THY1	THY1	Thy-1 membrane glycoprotein	3	3	150859	132318	277068
	P04233-2;P04233-5	HG2A_HUMAN	CD74	CD74	Isoform p35 of HLA class II histocompatibility antigen gamma chain	2	2	31996.5	21688.6	25004.6
	P04264;cRAP-P04264	K2C1_HUMAN;cRAP-K2C1_HUMAN	KRT1;cRAP-KRT1	KRT1	Keratin, type II cytoskeletal 1	8	0	102420	119101	114749
	P04271	S100B_HUMAN	S100B	S100B	Protein S100-B	1	1	5079.14	4005.88	3692.13
	P04350	TBB4A_HUMAN	TUBB4A	TUBB4A	Tubulin beta-4A chain	6	3	3.61851e+06	4.89618e+06	5.69029e+06
	P04406	G3P_HUMAN	GAPDH	GAPDH	Glyceraldehyde-3-phosphate dehydrogenase	19	18	4.00672e+06	4.99013e+06	6.04615e+06
	P04424	ARLY_HUMAN	ASL	ASL	Argininosuccinate lyase	13	13	108763	103757	120708
	P04439-2	HLAA_HUMAN	HLA-A	HLA-A	Isoform 2 of HLA class I histocompatibility antigen, A alpha chain	8	3	87050.7	83558.5	84599.1
	P04626;P04626-4;P04626-5	ERBB2_HUMAN	ERBB2	ERBB2	Receptor tyrosine-protein kinase erbB-2	7	5	42785.8	42653.2	40876.3
	P04632	CPNS1_HUMAN	CAPNS1	CAPNS1	Calpain small subunit 1	8	6	521518	514334	482975
	P04637;P04637-2;P04637-3;P04637-4;P04637-5;P04637-6;P04637-7;P04637-8;P04637-9	P53_HUMAN	TP53	TP53	Cellular tumor antigen p53	1	1	12052.8	10148.9	7903.8
	P04792	HSPB1_HUMAN	HSPB1	HSPB1	Heat shock protein beta-1	17	17	1.27179e+06	1.12296e+06	1.69147e+06
	P04818	TYSY_HUMAN	TYMS	TYMS	Thymidylate synthase	13	13	506353	526809	524810
	P04843	RPN1_HUMAN	RPN1	RPN1	Dolichyl-diphosphooligosaccharide--protein glycosyltransferase subunit 1	34	34	774198	777560	671659
	P04844;P04844-2	RPN2_HUMAN	RPN2	RPN2	Dolichyl-diphosphooligosaccharide--protein glycosyltransferase subunit 2	20	20	486330	494022	482924
	P04899	GNAI2_HUMAN	GNAI2	GNAI2	Guanine nucleotide-binding protein G(i) subunit alpha-2	16	10	500722	498045	460670
	P04920;P04920-2;P04920-3	B3A2_HUMAN	SLC4A2	SLC4A2	Anion exchange protein 2	8	7	52257.1	48220.4	39922.6
	P04921;P04921-2;P04921-3	GLPC_HUMAN	GYPC	GYPC	Glycophorin-C	2	2	129074	121595	76343.5
	P05023;P05023-4	AT1A1_HUMAN	ATP1A1	ATP1A1	Sodium/potassium-transporting ATPase subunit alpha-1	41	27	544064	554705	498608
	P05026;P05026-2	AT1B1_HUMAN	ATP1B1	ATP1B1	Sodium/potassium-transporting ATPase subunit beta-1	7	7	176022	173708	195894
	P05062	ALDOB_HUMAN	ALDOB	ALDOB	Fructose-bisphosphate aldolase B	2	2	101320		33950.1
	P05067-3;P05067-4	A4_HUMAN	APP	APP	Isoform L-APP677 of Amyloid-beta precursor protein	1	1	15117.5
	P05067;P05067-9	A4_HUMAN	APP	APP	Amyloid-beta precursor protein	19	19	172634	179875	181844
	P05091	ALDH2_HUMAN	ALDH2	ALDH2	Aldehyde dehydrogenase, mitochondrial	23	20	433088	418072	439611
	P05107;P26010;P26010-2	ITB2_HUMAN;ITB7_HUMAN	ITGB2;ITGB7	ITGB2	Integrin beta-2	1	0	137027	126996	83467.9
	P05114	HMGN1_HUMAN	HMGN1	HMGN1	Non-histone chromosomal protein HMG-14	6	6	2.76267e+06	2.26197e+06	3.15214e+06
	P05121;P05121-2	PAI1_HUMAN	SERPINE1	SERPINE1	Plasminogen activator inhibitor 1	3	3	24058.6	26781.2	22342.5
	P05141	ADT2_HUMAN	SLC25A5	SLC25A5	ADP/ATP translocase 2	14	5	1.30814e+06	1.35098e+06	1.57251e+06
	P05155;P05155-3	IC1_HUMAN	SERPING1	SERPING1	Plasma protease C1 inhibitor	5	5	67297.3	86033.6	73802.3
	P05161	ISG15_HUMAN	ISG15	ISG15	Ubiquitin-like protein ISG15	9	9	174078	181883	184465
	P05165;P05165-2	PCCA_HUMAN	PCCA	PCCA	Propionyl-CoA carboxylase alpha chain, mitochondrial	27	27	59410.3	61875.9	55336.5
	P05166	PCCB_HUMAN	PCCB	PCCB	Propionyl-CoA carboxylase beta chain, mitochondrial	18	18	300646	266025	267621
Yes	P05186	PPBT_HUMAN	ALPL	ALPL	Alkaline phosphatase, tissue-nonspecific isozyme	13	13	314826	272929	302182
	P05198	IF2A_HUMAN	EIF2S1	EIF2S1	Eukaryotic translation initiation factor 2 subunit 1	18	18	747796	857568	974517
	P05204	HMGN2_HUMAN	HMGN2	HMGN2	Non-histone chromosomal protein HMG-17	5	4	1.2895e+06	1.03666e+06	2.90899e+06
	P05230;P05230-2	FGF1_HUMAN	FGF1	FGF1	Fibroblast growth factor 1	1	1	26832.2
	P05362	ICAM1_HUMAN	ICAM1	ICAM1	Intercellular adhesion molecule 1	5	5	14976.3	15020.5	14383.9
	P05386	RLA1_HUMAN	RPLP1	RPLP1	Large ribosomal subunit protein P1	1	1	3.55901e+06	2.88126e+06	3.85168e+06
	P05387	RLA2_HUMAN	RPLP2	RPLP2	Large ribosomal subunit protein P2	6	6	3.52808e+06	2.83753e+06	5.19283e+06
	P05388	RLA0_HUMAN	RPLP0	RPLP0	Large ribosomal subunit protein uL10	1	0	581446		533911
	P05388-2	RLA0_HUMAN	RPLP0	RPLP0	Isoform 2 of Large ribosomal subunit protein uL10	10	3	2.72608e+06	2.73048e+06	3.36453e+06
	P05412	JUN_HUMAN	JUN	JUN	Transcription factor Jun	3	3	37502.9	40602.3	55746.9
	P05413;cRAP-P05413	FABPH_HUMAN;cRAP-FABPH_HUMAN	FABP3;cRAP-FABP3	FABP3	Fatty acid-binding protein, heart	5	0	81146.1	90185.6	99432.1
	P05423	RPC4_HUMAN	POLR3D	POLR3D	DNA-directed RNA polymerase III subunit RPC4	10	10	54573.5	59989	49681.7
	P05455	LA_HUMAN	SSB	SSB	Lupus La protein	24	24	977530	1.07502e+06	1.22091e+06
Yes	P05556	ITB1_HUMAN	ITGB1	ITGB1	Integrin beta-1	21	21	822196	860424	850317
	P05783	K1C18_HUMAN	KRT18	KRT18	Keratin, type I cytoskeletal 18	33	30	5.12883e+06	5.62133e+06	4.83073e+06
	P05787;P05787-2	K2C8_HUMAN	KRT8	KRT8	Keratin, type II cytoskeletal 8	42	33	4.56529e+06	5.12413e+06	4.94779e+06
	P05937	CALB1_HUMAN	CALB1	CALB1	Calbindin	6	5	37712.3	31073.6	40827.4
	P05976;P05976-2	MYL1_HUMAN	MYL1	MYL1	Myosin light chain 1/3, skeletal muscle isoform	3	3	56128.5	45724.7	51072.6
	P05997	CO5A2_HUMAN	COL5A2	COL5A2	Collagen alpha-2(V) chain	12	11	142162	170588	186001
	P06132	DCUP_HUMAN	UROD	UROD	Uroporphyrinogen decarboxylase	9	9	284253	268248	299184
	P06213;P06213-2	INSR_HUMAN	INSR	INSR	Insulin receptor	1	1	51876.1
	P06241	FYN_HUMAN	FYN	FYN	Tyrosine-protein kinase Fyn	6	6	15269.4	15070.3	17629
	P06276	CHLE_HUMAN	BCHE	BCHE	Cholinesterase	6	6	85384.5	93963.9	99575.7
	P06280	AGAL_HUMAN	GLA	GLA	Alpha-galactosidase A	9	9	81726.6	81504.5	97166.8
	P06396-2	GELS_HUMAN	GSN	GSN	Isoform 2 of Gelsolin	26	1	774810	791085	922988
	P06400	RB_HUMAN	RB1	RB1	Retinoblastoma-associated protein	24	24	297647	310048	295424
	P06454;P06454-2	PTMA_HUMAN	PTMA	PTMA	Prothymosin alpha	6	6	4.64365e+06	3.52947e+06	4.2575e+06
	P06493	CDK1_HUMAN	CDK1	CDK1	Cyclin-dependent kinase 1	18	17	768784	796914	809106
	P06576	ATPB_HUMAN	ATP5F1B	ATP5F1B	ATP synthase subunit beta, mitochondrial	25	25	3.05817e+06	3.39301e+06	3.21939e+06
	P06703	S10A6_HUMAN	S100A6	S100A6	Protein S100-A6	1	1	397620	384720	650707
	P06730;P06730-2;P06730-3	IF4E_HUMAN	EIF4E	EIF4E	Eukaryotic translation initiation factor 4E	8	7	928608	851807	870707
	P06732;cRAP-P06732	KCRM_HUMAN;cRAP-KCRM_HUMAN	CKM;cRAP-CKM	CKM	Creatine kinase M-type	3	0	98987.8	48754.4	36361.5
	P06733	ENOA_HUMAN	ENO1	ENO1	Alpha-enolase	30	27	4.21597e+06	4.66151e+06	5.19921e+06
	P06737;P06737-2	PYGL_HUMAN	PYGL	PYGL	Glycogen phosphorylase, liver form	22	22	794652	881794	1.11771e+06
	P06744;P06744-2	G6PI_HUMAN	GPI	GPI	Glucose-6-phosphate isomerase	19	18	1.10771e+06	1.17238e+06	1.30108e+06
	P06746	DPOLB_HUMAN	POLB	POLB	DNA polymerase beta	13	13	70102	82240.4	78372.5
	P06748	NPM_HUMAN	NPM1	NPM1	Nucleophosmin	12	12	4.73381e+06	5.15014e+06	5.58057e+06
	P06753	TPM3_HUMAN	TPM3	TPM3	Tropomyosin alpha-3 chain	1	0	35325.1	32587.1	45408.2
	P06753-3	TPM3_HUMAN	TPM3	TPM3	Isoform 3 of Tropomyosin alpha-3 chain	29	19	5.94287e+06	6.00773e+06	7.4957e+06
	P06756;P06756-3	ITAV_HUMAN	ITGAV	ITGAV	Integrin alpha-V	43	43	352052	374300	354629
	P06865	HEXA_HUMAN	HEXA	HEXA	Beta-hexosaminidase subunit alpha	11	11	89401.2	84765	97504.2
	P07093-2;P07093-3	GDN_HUMAN	SERPINE2	SERPINE2	Isoform 2 of Glia-derived nexin	10	10	62287.1	66362.5	86376.2
	P07099	HYEP_HUMAN	EPHX1	EPHX1	Epoxide hydrolase 1	15	15	1.23599e+06	1.15926e+06	941625
	P07108	ACBP_HUMAN	DBI	DBI	Acyl-CoA-binding protein	7	7	1.40377e+06	1.456e+06	1.74479e+06
	P07195	LDHB_HUMAN	LDHB	LDHB	L-lactate dehydrogenase B chain	20	19	5.17192e+06	5.57719e+06	7.33384e+06
	P07196	NFL_HUMAN	NEFL	NEFL	Neurofilament light polypeptide	20	20	133228	146243	135002
	P07197	NFM_HUMAN	NEFM	NEFM	Neurofilament medium polypeptide	40	37	377856	413172	471530
	P07199	CENPB_HUMAN	CENPB	CENPB	Major centromere autoantigen B	7	7	29039.4	26961.9	22204
	P07203	GPX1_HUMAN	GPX1	GPX1	Glutathione peroxidase 1	9	9	128687	129307	162183
	P07205	PGK2_HUMAN	PGK2	PGK2	Phosphoglycerate kinase 2	1	1	38695.5	40607.6	54635.1
	P07305	H10_HUMAN	H1-0	H1-0	Histone H1.0	4	4	253369	259494	321256
	P07311	ACYP1_HUMAN	ACYP1	ACYP1	Acylphosphatase-1	4	4	95976.2	90393.6	94835.9
	P07339;cRAP-P07339	CATD_HUMAN;cRAP-CATD_HUMAN	CTSD;cRAP-CTSD	CTSD	Cathepsin D	16	0	627933	782601	822373
	P07355;P07355-2	ANXA2_HUMAN	ANXA2	ANXA2	Annexin A2	23	8	3.04406e+06	3.13139e+06	3.55077e+06
	P07384	CAN1_HUMAN	CAPN1	CAPN1	Calpain-1 catalytic subunit	25	25	153794	148823	176314
	P07437	TBB5_HUMAN	TUBB	TUBB	Tubulin beta chain	10	4	6.96291e+06	7.20578e+06	8.11904e+06
	P07451	CAH3_HUMAN	CA3	CA3	Carbonic anhydrase 3	10	10	368082	380842	398018
	P07602	SAP_HUMAN	PSAP	PSAP	Prosaposin	17	17	327956	326718	506464
	P07686	HEXB_HUMAN	HEXB	HEXB	Beta-hexosaminidase subunit beta	14	14	161644	177502	246471
	P07711;P07711-3	CATL1_HUMAN	CTSL	CTSL	Procathepsin L	3	3	155527	149954	198783
	P07737	PROF1_HUMAN	PFN1	PFN1	Profilin-1	12	12	5.40704e+06	6.41488e+06	8.44919e+06
	P07738	PMGE_HUMAN	BPGM	BPGM	Bisphosphoglycerate mutase	5	5	37293.3	35648.6	44815.7
	P07741	APT_HUMAN	APRT	APRT	Adenine phosphoribosyltransferase	11	11	526910	514122	651930
	P07814	SYEP_HUMAN	EPRS1	EPRS1	Bifunctional glutamate/proline--tRNA ligase	67	66	412428	434617	482029
	P07858	CATB_HUMAN	CTSB	CTSB	Cathepsin B	9	9	792152	905355	1.02143e+06
	P07900;P07900-2	HS90A_HUMAN	HSP90AA1	HSP90AA1	Heat shock protein HSP 90-alpha	38	18	6.12029e+06	6.1828e+06	6.78157e+06
	P07902	GALT_HUMAN	GALT	GALT	Galactose-1-phosphate uridylyltransferase	4	4	47049.9	43728.2	41287.7
	P07910-2	HNRPC_HUMAN	HNRNPC	HNRNPC	Isoform C1 of Heterogeneous nuclear ribonucleoproteins C1/C2	20	11	2.04937e+06	2.24379e+06	2.49026e+06
	P07919	QCR6_HUMAN	UQCRH	UQCRH	Cytochrome b-c1 complex subunit 6, mitochondrial	4	3	275698	283148	354464
	P07942	LAMB1_HUMAN	LAMB1	LAMB1	Laminin subunit beta-1	37	37	612230	249110	283437
	P07947	YES_HUMAN	YES1	YES1	Tyrosine-protein kinase Yes	10	8	107601	92063.3	95947.2
	P07948-2	LYN_HUMAN	LYN	LYN	Isoform 2 of Tyrosine-protein kinase Lyn	15	11	456865	452697	407326
	P07951	TPM2_HUMAN	TPM2	TPM2	Tropomyosin beta chain	10	10	2.45772e+06	2.51144e+06	3.28574e+06
	P07951-3	TPM2_HUMAN	TPM2	TPM2	Isoform 3 of Tropomyosin beta chain	2	2	33714.6	56886	82970.4
	P07954;P07954-2	FUMH_HUMAN	FH	FH	Fumarate hydratase, mitochondrial	16	16	484064	508820	512417
	P07992	ERCC1_HUMAN	ERCC1	ERCC1	DNA excision repair protein ERCC-1	9	9	239095	195392	242567
	P07996	TSP1_HUMAN	THBS1	THBS1	Thrombospondin-1	24	24	75625	80236	93346
Yes	P08047;P08047-2;P08047-3	SP1_HUMAN	SP1	SP1	Transcription factor Sp1	3	3	22902.5	28148.1	23325.9
	P08048;P08048-2;P08048-3	ZFY_HUMAN	ZFY	ZFY	Zinc finger Y-chromosomal protein	6	1	34598.8	31521.5	28096.1
	P08069	IGF1R_HUMAN	IGF1R	IGF1R	Insulin-like growth factor 1 receptor	18	17	38977.5	42885.5	38036.6
	P08123	CO1A2_HUMAN	COL1A2	COL1A2	Collagen alpha-2(I) chain	11	11	94961.5	84798.4	92430
	P08133	ANXA6_HUMAN	ANXA6	ANXA6	Annexin A6	44	44	1.03707e+06	1.17253e+06	1.3226e+06
	P08134	RHOC_HUMAN	RHOC	RHOC	Rho-related GTP-binding protein RhoC	3	3	299660	290068	290661
	P08138;P08138-2	TNR16_HUMAN	NGFR	NGFR	Tumor necrosis factor receptor superfamily member 16	2	2	25046.2	36051.6	34799.5
	P08195;P08195-2;P08195-3;P08195-4;P08195-5	4F2_HUMAN	SLC3A2	SLC3A2	Amino acid transporter heavy chain SLC3A2	22	22	359040	319211	347009
	P08236;P08236-3	BGLR_HUMAN	GUSB	GUSB	Beta-glucuronidase	7	7	46334.5	53063.9	52818.8
	P08237;P08237-3	PFKAM_HUMAN	PFKM	PFKM	ATP-dependent 6-phosphofructokinase, muscle type	27	25	213679	233636	251624
	P08238	HS90B_HUMAN	HSP90AB1	HSP90AB1	Heat shock protein HSP 90-beta	30	16	6.02134e+06	6.33475e+06	7.01715e+06
	P08240	SRPRA_HUMAN	SRPRA	SRPRA	Signal recognition particle receptor subunit alpha	19	19	91814.6	100201	94387.2
	P08243;P08243-2	ASNS_HUMAN	ASNS	ASNS	Asparagine synthetase [glutamine-hydrolyzing]	22	22	170633	175313	189467
	P08253	MMP2_HUMAN	MMP2	MMP2	72 kDa type IV collagenase	15	15	64609.6	60177.9	55802.1
	P08294	SODE_HUMAN	SOD3	SOD3	Extracellular superoxide dismutase [Cu-Zn]	1	1			2432.34
	P08397;P08397-2	HEM3_HUMAN	HMBS	HMBS	Porphobilinogen deaminase	13	13	126661	115300	113266
	P08473	NEP_HUMAN	MME	MME	Neprilysin	33	33	227191	240083	239628
	P08559;P08559-2;P08559-4	ODPA_HUMAN	PDHA1	PDHA1	Pyruvate dehydrogenase E1 component subunit alpha, somatic form, mitochondrial	18	14	248185	321100	342562
	P08572	CO4A2_HUMAN	COL4A2	COL4A2	Collagen alpha-2(IV) chain	7	7	165040	150771	149786
	P08574	CY1_HUMAN	CYC1	CYC1	Cytochrome c1, heme protein, mitochondrial	8	8	239623	256784	199757
	P08579	RU2B_HUMAN	SNRPB2	SNRPB2	U2 small nuclear ribonucleoprotein B''	11	9	912634	1.02746e+06	1.16185e+06
	P08621	RU17_HUMAN	SNRNP70	SNRNP70	U1 small nuclear ribonucleoprotein 70 kDa	15	15	920058	826531	865224
	P08648	ITA5_HUMAN	ITGA5	ITGA5	Integrin alpha-5	20	20	300937	299954	300018
	P08670	VIME_HUMAN	VIM	VIM	Vimentin	49	38	6.92435e+06	8.25748e+06	8.61004e+06
	P08708	RS17_HUMAN	RPS17	RPS17	Small ribosomal subunit protein eS17	9	9	1.13072e+06	1.29237e+06	1.32068e+06
	P08727	K1C19_HUMAN	KRT19	KRT19	Keratin, type I cytoskeletal 19	32	20	2.18366e+06	2.114e+06	1.9523e+06
	P08729	K2C7_HUMAN	KRT7	KRT7	Keratin, type II cytoskeletal 7	2	2	13842.8
	P08754	GNAI3_HUMAN	GNAI3	GNAI3	Guanine nucleotide-binding protein G(i) subunit alpha-3	7	7	366585	369970	329592
	P08758;cRAP-P08758	ANXA5_HUMAN;cRAP-ANXA5_HUMAN	ANXA5;cRAP-ANXA5	ANXA5	Annexin A5	22	0	1.26006e+06	1.58167e+06	1.57282e+06
	P08865	RSSA_HUMAN	RPSA	RPSA	Small ribosomal subunit protein uS2	15	2	2.51789e+06	2.58584e+06	3.14954e+06
	P08962;P08962-2;P08962-3	CD63_HUMAN	CD63	CD63	CD63 antigen	2	2	65719.9	143650	169458
	P09001	RM03_HUMAN	MRPL3	MRPL3	Large ribosomal subunit protein uL3m	7	7	73479.1	67082	57268.7
	P09012	SNRPA_HUMAN	SNRPA	SNRPA	U1 small nuclear ribonucleoprotein A	6	6	571251	683716	884469
Yes	P09038;P09038-1;P09038-2;P09038-3	FGF2_HUMAN	FGF2	FGF2	Fibroblast growth factor 2	5	5	1.06282e+06	1.36455e+06	1.6252e+06
	P09067	HXB5_HUMAN	HOXB5	HOXB5	Homeobox protein Hox-B5	1	1		24795.1	24984
	P09104	ENOG_HUMAN	ENO2	ENO2	Gamma-enolase	9	8	88620.4	79681.1	89428.3
	P09110	THIK_HUMAN	ACAA1	ACAA1	3-ketoacyl-CoA thiolase, peroxisomal	10	10	107569	98730.3	97349.6
	P09132	SRP19_HUMAN	SRP19	SRP19	Signal recognition particle 19 kDa protein	6	6	236680	204287	229650
	P09211;cRAP-P09211	GSTP1_HUMAN;cRAP-GSTP1_HUMAN	GSTP1;cRAP-GSTP1	GSTP1	Glutathione S-transferase P	14	0	3.6947e+06	3.72356e+06	3.98005e+06
	P09234	RU1C_HUMAN	SNRPC	SNRPC	U1 small nuclear ribonucleoprotein C	3	3	881931	1.18337e+06	1.5072e+06
	P09327	VILI_HUMAN	VIL1	VIL1	Villin-1	5	4	12857.5	9387.8	10838.3
	P09382	LEG1_HUMAN	LGALS1	LGALS1	Galectin-1	7	7	958690	978556	1.12654e+06
	P09417	DHPR_HUMAN	QDPR	QDPR	Dihydropteridine reductase	4	4	97501.5	116719	142972
	P09429	HMGB1_HUMAN	HMGB1	HMGB1	High mobility group protein B1	10	3	4.61692e+06	5.60376e+06	6.24979e+06
	P09455	RET1_HUMAN	RBP1	RBP1	Retinol-binding protein 1	12	12	121176	169361	187616
	P09471-2	GNAO_HUMAN	GNAO1	GNAO1	Isoform Alpha-2 of Guanine nucleotide-binding protein G(o) subunit alpha	3	3	16023.1	17262.1	12236.6
	P09486	SPRC_HUMAN	SPARC	SPARC	SPARC	11	11	160070	203899	222287
	P09493-8	TPM1_HUMAN	TPM1	TPM1	Isoform 8 of Tropomyosin alpha-1 chain	20	19	3.83834e+06	3.82605e+06	5.89307e+06
	P09496-2	CLCA_HUMAN	CLTA	CLTA	Isoform Non-brain of Clathrin light chain A	9	9	1.81153e+06	2.04944e+06	2.92285e+06
	P09497-2	CLCB_HUMAN	CLTB	CLTB	Isoform Non-brain of Clathrin light chain B	10	10	295066	269781	358320
	P09525;P09525-3	ANXA4_HUMAN	ANXA4	ANXA4	Annexin A4	13	13	97295.8	95220.9	98603
	P09543	CN37_HUMAN	CNP	CNP	2',3'-cyclic-nucleotide 3'-phosphodiesterase	22	22	1.13746e+06	1.0868e+06	1.03746e+06
	P09601	HMOX1_HUMAN	HMOX1	HMOX1	Heme oxygenase 1	6	6	55595.5	49267.9	49090.3
	P09603	CSF1_HUMAN	CSF1	CSF1	Macrophage colony-stimulating factor 1	1	1	9906.89
	P09619	PGFRB_HUMAN	PDGFRB	PDGFRB	Platelet-derived growth factor receptor beta	20	19	278414	280606	240978
	P09622	DLDH_HUMAN	DLD	DLD	Dihydrolipoyl dehydrogenase, mitochondrial	14	14	336977	378054	350136
	P09630	HXC6_HUMAN	HOXC6	HOXC6	Homeobox protein Hox-C6	1	1	3739.11		1953.76
	P09651;P09651-2	ROA1_HUMAN	HNRNPA1	HNRNPA1	Heterogeneous nuclear ribonucleoprotein A1	1	0	2.98998e+06	2.98349e+06	2.80195e+06
	P09661	RU2A_HUMAN	SNRPA1	SNRPA1	U2 small nuclear ribonucleoprotein A'	13	13	972205	881943	930695
	P09668	CATH_HUMAN	CTSH	CTSH	Pro-cathepsin H	2	2	11466.9	16705.6	13519
	P09669	COX6C_HUMAN	COX6C	COX6C	Cytochrome c oxidase subunit 6C	4	4	360324	352932	675539
	P09874	PARP1_HUMAN	PARP1	PARP1	Poly [ADP-ribose] polymerase 1	46	46	1.16527e+06	1.14549e+06	1.12082e+06
	P09884	DPOLA_HUMAN	POLA1	POLA1	DNA polymerase alpha catalytic subunit	39	39	94102.3	101669	111885
	P09936	UCHL1_HUMAN	UCHL1	UCHL1	Ubiquitin carboxyl-terminal hydrolase isozyme L1	11	11	1.45427e+06	1.71596e+06	1.78695e+06
	P09958	FURIN_HUMAN	FURIN	FURIN	Furin	7	7	21042.2	21096.6	20428
	P09960	LKHA4_HUMAN	LTA4H	LTA4H	Leukotriene A-4 hydrolase	29	29	317756	325264	377396
	P09972	ALDOC_HUMAN	ALDOC	ALDOC	Fructose-bisphosphate aldolase C	23	16	608400	707112	634224
	P0C1Z6;P0C1Z6-2	TFPT_HUMAN	TFPT	TFPT	TCF3 fusion partner	3	3	22349.4	22188.8	22027.7
	P0C2W1	FBSP1_HUMAN	FBXO45	FBXO45	F-box/SPRY domain-containing protein 1	2	2	13497.5	20576.2	15978.1
	P0C7T5	ATX1L_HUMAN	ATXN1L	ATXN1L	Ataxin-1-like	6	6	46929	41226.8	40617.2
	P0C7U0	ELFN1_HUMAN	ELFN1	ELFN1	Protein ELFN1	8	6	72724.7	66756.3	48875.5
	P0C7X2;P0C7X2-5	ZN688_HUMAN	ZNF688	ZNF688	Zinc finger protein 688	1	1	9596.09
	P0C870	JMJD7_HUMAN	JMJD7	JMJD7	Bifunctional peptidase and (3S)-lysyl hydroxylase JMJD7	2	1	6366.13	5223.5	4785.36
	P0CAP2	GRL1A_HUMAN	POLR2M	POLR2M	DNA-directed RNA polymerase II subunit GRINL1A	15	1	70966.1	69016.3	74980
	P0CG12	DERPC_HUMAN	DERPC	DERPC	Decreased expression in renal and prostate cancer protein	2	2	53862.9	44993.7	64421.2
	P0CG13	CTF8_HUMAN	CHTF8	CHTF8	Chromosome transmission fidelity protein 8 homolog	4	4	25704	37318.9	34803.5
	P0CG31	Z286B_HUMAN	ZNF286B	ZNF286B	Putative zinc finger protein 286B	1	0			16808.5
	P0CG34;P0CG35;P0DX04	TB15A_HUMAN;TB15B_HUMAN;TB15C_HUMAN	TMSB15A;TMSB15B;TMSB15C	TMSB15A	Thymosin beta-15A	2	0		266522	113376
	P0CJ78	ZN865_HUMAN	ZNF865	ZNF865	Zinc finger protein 865	4	4	13249.3	10240.9	10411.7
	P0CW24	PNM6A_HUMAN	PNMA6A	PNMA6A	Paraneoplastic antigen-like protein 6A	2	2	8777.62	7928.58
	P0DI81;P0DI81-3;P0DI82	TPC2A_HUMAN;TPC2B_HUMAN	TRAPPC2;TRAPPC2B	TRAPPC2	Trafficking protein particle complex subunit 2	1	0	15133.3	12260.9	12322.3
	P0DI83	NARR_HUMAN	RAB34	RAB34	Ras-related protein Rab-34, isoform NARR	1	1	47629.7	38283	40373.7
	P0DJ07	PT100_HUMAN	PET100	PET100	Protein PET100 homolog, mitochondrial	1	1	361409	316713	391369
	P0DJ93	SIM13_HUMAN	SMIM13	SMIM13	Small integral membrane protein 13	1	1	4476.15	2939.23
	P0DMM9;P0DMM9-3;P0DMN0	ST1A3_HUMAN;ST1A4_HUMAN	SULT1A3;SULT1A4	SULT1A3	Sulfotransferase 1A3	3	0	2376.43	3684.34	2385.46
	P0DMV8;P0DMV9	HS71A_HUMAN;HS71B_HUMAN	HSPA1A;HSPA1B	HSPA1A	Heat shock 70 kDa protein 1A	14	0	1.61759e+06	1.61271e+06	1.90895e+06
	P0DP23;P0DP24;P0DP25	CALM1_HUMAN;CALM2_HUMAN;CALM3_HUMAN	CALM1;CALM2;CALM3	CALM1	Calmodulin-1	4	0	2.38087e+06	2.58709e+06	3.77029e+06
	P0DPB5	RPC22_HUMAN	POLR1D	POLR1D	Protein POLR1D, isoform 2	3	3	70228.5	58221.8	78278.2
	P0DPB6	RPAC2_HUMAN	POLR1D	POLR1D	DNA-directed RNA polymerases I and III subunit RPAC2	5	5	130113	158796	185982
	P0DPD5	ZN723_HUMAN	ZNF723	ZNF723	Zinc finger protein 723	1	1		7795.71
	P0DPD7;P0DPD8	EFCE2_HUMAN;EFMT4_HUMAN	EEF1AKMT4;EEF1AKMT4-ECE2	EEF1AKMT4	EEF1A lysine methyltransferase 4	3	0	29095.7	26768.9	27362.3
	P0DPI2	GAL3A_HUMAN	GATD3	GATD3	Glutamine amidotransferase-like class 1 domain-containing protein 3, mitochondrial	8	8	354944	321413	286824
	P0DTL6	ZTRF1_HUMAN	ZFTRAF1	ZFTRAF1	Zinc finger TRAF-type-containing protein 1	7	3	48945.5	43226.9	45941.7
	P10071	GLI3_HUMAN	GLI3	GLI3	Transcriptional activator GLI3	22	21	113008	102880	93761.4
	P10074	TZAP_HUMAN	ZBTB48	ZBTB48	Telomere zinc finger-associated protein	2	2		21073.4
	P10109	ADX_HUMAN	FDX1	FDX1	Adrenodoxin, mitochondrial	3	3	125967	128510	184622
	P10114	RAP2A_HUMAN	RAP2A	RAP2A	Ras-related protein Rap-2a	5	4	67339.5	69601.8	60501.6
	P10155	RO60_HUMAN	RO60	RO60	RNA-binding protein RO60	21	21	244346	240814	246359
	P10176	COX8A_HUMAN	COX8A	COX8A	Cytochrome c oxidase subunit 8A, mitochondrial	1	1	286774	209777	184223
	P10244	MYBB_HUMAN	MYBL2	MYBL2	Myb-related protein B	7	7	18750.4	18462.7	18068.9
	P10253	LYAG_HUMAN	GAA	GAA	Lysosomal alpha-glucosidase	14	14	60987.3	67926.2	73159.9
	P10276;P10276-2	RARA_HUMAN	RARA	RARA	Retinoic acid receptor alpha	3	2	198175	177282	125621
	P10301	RRAS_HUMAN	RRAS	RRAS	Ras-related protein R-Ras	5	5	30173.9	29181.1	29198.6
	P10321	HLAC_HUMAN	HLA-C	HLA-C	HLA class I histocompatibility antigen, C alpha chain	4	1	19213.5	18383.2	18377.4
	P10398	ARAF_HUMAN	ARAF	ARAF	Serine/threonine-protein kinase A-Raf	7	6	133339	135015	154725
	P10412	H14_HUMAN	H1-4	H1-4	Histone H1.4	1	1	703421	545897	739155
	P10415;P10415-2	BCL2_HUMAN	BCL2	BCL2	Apoptosis regulator Bcl-2	1	1	7350.09	8553.41	6855.39
	P10451-5	OSTP_HUMAN	SPP1	SPP1	Isoform 2 of Osteopontin	5	5	16620.3	16022.6	16587.2
	P10515	ODP2_HUMAN	DLAT	DLAT	Dihydrolipoyllysine-residue acetyltransferase component of pyruvate dehydrogenase complex, mitochondrial	16	16	210019	232333	253802
	P10586;P10586-2	PTPRF_HUMAN	PTPRF	PTPRF	Receptor-type tyrosine-protein phosphatase F	23	15	72613.7	68260.9	64639.7
	P10588	NR2F6_HUMAN	NR2F6	NR2F6	Nuclear receptor subfamily 2 group F member 6	10	8	46438.4	52568.7	58340.3
	P10599;cRAP-P10599	THIO_HUMAN;cRAP-THIO_HUMAN	TXN;cRAP-TXN	TXN	Thioredoxin	7	0	5.91276e+06	6.35457e+06	5.89214e+06
	P10606	COX5B_HUMAN	COX5B	COX5B	Cytochrome c oxidase subunit 5B, mitochondrial	6	6	732419	657452	1.17841e+06
	P10619;P10619-2	PPGB_HUMAN	CTSA	CTSA	Lysosomal protective protein	6	6	133728	121503	140593
	P10620	MGST1_HUMAN	MGST1	MGST1	Microsomal glutathione S-transferase 1	2	2	418736	431916	364011
	P10636-2;P10636-6	TAU_HUMAN	MAPT	MAPT	Isoform Fetal-tau of Microtubule-associated protein tau	3	1	32616.9	22120.8	26401.9
	P10644	KAP0_HUMAN	PRKAR1A	PRKAR1A	cAMP-dependent protein kinase type I-alpha regulatory subunit	15	13	325002	327614	402318
Yes	P10721;P10721-2	KIT_HUMAN	KIT	KIT	Mast/stem cell growth factor receptor Kit	2	2	6648.86	5112.28	5356.9
	P10746	HEM4_HUMAN	UROS	UROS	Uroporphyrinogen-III synthase	6	6	23129	22128.1	26980.8
	P10768	ESTD_HUMAN	ESD	ESD	S-formylglutathione hydrolase	12	12	593623	592659	678759
	P10809	CH60_HUMAN	HSPD1	HSPD1	60 kDa heat shock protein, mitochondrial	36	36	3.40747e+06	3.57415e+06	3.88708e+06
	P10909-2;P10909;P10909-4;P10909-5;P10909-6	CLUS_HUMAN	CLU	CLU	Clusterin	4	4	18605.3	13221.7	17998.2
	P10915	HPLN1_HUMAN	HAPLN1	HAPLN1	Hyaluronan and proteoglycan link protein 1	16	15	111640	113967	99297
	P11021	BIP_HUMAN	HSPA5	HSPA5	Endoplasmic reticulum chaperone BiP	40	38	4.24037e+06	4.59822e+06	5.27035e+06
	P11047	LAMC1_HUMAN	LAMC1	LAMC1	Laminin subunit gamma-1	45	44	554831	323713	329399
	P11117	PPAL_HUMAN	ACP2	ACP2	Lysosomal acid phosphatase	7	7	217022	199944	192992
	P11137-4	MTAP2_HUMAN	MAP2	MAP2	Isoform 4 of Microtubule-associated protein 2	3	3	40321.2	43805.1	52897.1
	P11137;P11137-3	MTAP2_HUMAN	MAP2	MAP2	Microtubule-associated protein 2	34	34	132619	126068	159897
	P11142	HSP7C_HUMAN	HSPA8	HSPA8	Heat shock cognate 71 kDa protein	36	24	4.36293e+06	5.53027e+06	6.47305e+06
	P11166	GTR1_HUMAN	SLC2A1	SLC2A1	Solute carrier family 2, facilitated glucose transporter member 1	7	7	423668	478555	446590
	P11169	GTR3_HUMAN	SLC2A3	SLC2A3	Solute carrier family 2, facilitated glucose transporter member 3	7	2	564067	660396	487079
	P11171	EPB41_HUMAN	EPB41	EPB41	Protein 4.1	23	22	192187	179526	178816
	P11172	UMPS_HUMAN	UMPS	UMPS	Uridine 5'-monophosphate synthase	21	21	161177	183139	209102
	P11177;P11177-2	ODPB_HUMAN	PDHB	PDHB	Pyruvate dehydrogenase E1 component subunit beta, mitochondrial	15	15	291369	345176	354921
	P11182	ODB2_HUMAN	DBT	DBT	Lipoamide acyltransferase component of branched-chain alpha-keto acid dehydrogenase complex, mitochondrial	12	12	72918.8	76290	70064.2
	P11216	PYGB_HUMAN	PYGB	PYGB	Glycogen phosphorylase, brain form	35	27	228033	230484	252152
	P11217	PYGM_HUMAN	PYGM	PYGM	Glycogen phosphorylase, muscle form	1	1			19701
	P11233	RALA_HUMAN	RALA	RALA	Ras-related protein Ral-A	9	7	270343	255726	233905
	P11234;P11234-2;P11234-3	RALB_HUMAN	RALB	RALB	Ras-related protein Ral-B	6	6	141308	121092	112306
	P11274	BCR_HUMAN	BCR	BCR	Breakpoint cluster region protein	23	21	325302	337031	369600
	P11279	LAMP1_HUMAN	LAMP1	LAMP1	Lysosome-associated membrane glycoprotein 1	8	8	871781	918350	1.19996e+06
	P11308;P11308-1;P11308-2;P11308-3;P11308-5;P11308-6	ERG_HUMAN	ERG	ERG	Transcriptional regulator ERG	1	1	3496.06
	P11310;P11310-2	ACADM_HUMAN	ACADM	ACADM	Medium-chain specific acyl-CoA dehydrogenase, mitochondrial	13	13	153778	168076	198267
	P11387	TOP1_HUMAN	TOP1	TOP1	DNA topoisomerase 1	38	33	511124	556394	540877
	P11388;P11388-2;P11388-3;P11388-4	TOP2A_HUMAN	TOP2A	TOP2A	DNA topoisomerase 2-alpha	43	43	253863	282585	251113
	P11413;P11413-2;P11413-3	G6PD_HUMAN	G6PD	G6PD	Glucose-6-phosphate 1-dehydrogenase	26	26	588568	576656	663290
	P11441	UBL4A_HUMAN	UBL4A	UBL4A	Ubiquitin-like protein 4A	7	7	348498	325369	455108
	P11474;P11474-2	ERR1_HUMAN	ESRRA	ESRRA	Steroid hormone receptor ERR1	4	3	9807.62	7795.68	12871.5
	P11498	PYC_HUMAN	PC	PC	Pyruvate carboxylase, mitochondrial	35	35	910027	951176	935748
	P11532-9	DMD_HUMAN	DMD	DMD	Isoform 16 of Dystrophin	2	2	7049.86	11932.1	11072
	P11532;P11532-11;P11532-4	DMD_HUMAN	DMD	DMD	Dystrophin	13	13	152469	183561	143445
	P11586	C1TC_HUMAN	MTHFD1	MTHFD1	C-1-tetrahydrofolate synthase, cytoplasmic	46	45	806425	812156	943183
	P11717	MPRI_HUMAN	IGF2R	IGF2R	Cation-independent mannose-6-phosphate receptor	62	62	285462	314285	304232
	P11766	ADHX_HUMAN	ADH5	ADH5	Alcohol dehydrogenase class-3	15	15	1.08763e+06	1.14478e+06	1.40661e+06
	P11802	CDK4_HUMAN	CDK4	CDK4	Cyclin-dependent kinase 4	10	10	69059.3	71407.4	74886.8
	P11908;P11908-2	PRPS2_HUMAN	PRPS2	PRPS2	Ribose-phosphate pyrophosphokinase 2	13	7	421365	422149	486070
	P11926	DCOR_HUMAN	ODC1	ODC1	Ornithine decarboxylase	9	9	36167.6	36396.2	46512.2
	P12004	PCNA_HUMAN	PCNA	PCNA	Proliferating cell nuclear antigen	12	12	1.92661e+06	1.90331e+06	2.22052e+06
	P12081;P12081-4;cRAP-P12081	HARS1_HUMAN;cRAP-SYHC_HUMAN	HARS1;cRAP-HARS	HARS1	Histidine--tRNA ligase, cytoplasmic	18	0	557221	580347	561027
	P12107;P12107-2;P12107-3	COBA1_HUMAN	COL11A1	COL11A1	Collagen alpha-1(XI) chain	10	10	39230.9	42317.2	47631.2
	P12109	CO6A1_HUMAN	COL6A1	COL6A1	Collagen alpha-1(VI) chain	22	22	163493	164101	165655
	P12110	CO6A2_HUMAN	COL6A2	COL6A2	Collagen alpha-2(VI) chain	18	18	119896	149330	170122
	P12110-2	CO6A2_HUMAN	COL6A2	COL6A2	Isoform 2C2A of Collagen alpha-2(VI) chain	1	1	27654.7	21488.6	22328.7
	P12111;P12111-2	CO6A3_HUMAN	COL6A3	COL6A3	Collagen alpha-3(VI) chain	72	72	289481	293599	283025
	P12235	ADT1_HUMAN	SLC25A4	SLC25A4	ADP/ATP translocase 1	3	3	58438.3	61086.2	58476
	P12236	ADT3_HUMAN	SLC25A6	SLC25A6	ADP/ATP translocase 3	4	2	438078	659916	753039
	P12270	TPR_HUMAN	TPR	TPR	Nucleoprotein TPR	96	96	316662	318739	322660
	P12277	KCRB_HUMAN	CKB	CKB	Creatine kinase B-type	18	16	1.03221e+06	1.05429e+06	1.08889e+06
	P12429	ANXA3_HUMAN	ANXA3	ANXA3	Annexin A3	20	20	458217	444840	499314
	P12532	KCRU_HUMAN	CKMT1A	CKMT1A	Creatine kinase U-type, mitochondrial	7	2	46328.2	51479.7	52990.6
	P12644	BMP4_HUMAN	BMP4	BMP4	Bone morphogenetic protein 4	4	4	16910.5	13386.1	12676
	P12694	ODBA_HUMAN	BCKDHA	BCKDHA	2-oxoisovalerate dehydrogenase subunit alpha, mitochondrial	12	12	1.43655e+06	1.29916e+06	1.20546e+06
	P12757;P12757-5	SKIL_HUMAN	SKIL	SKIL	Ski-like protein	6	6	21348	15911.2	13950.5
	P12814	ACTN1_HUMAN	ACTN1	ACTN1	Alpha-actinin-1	32	28	1.3677e+06	1.47466e+06	1.53934e+06
	P12829	MYL4_HUMAN	MYL4	MYL4	Myosin light chain 4	9	7	491916	473921	549869
Yes	P12830	CADH1_HUMAN	CDH1	CDH1	Cadherin-1	4	4	19933.4	16935	16197.6
	P12931;P12931-2;P12931-3	SRC_HUMAN	SRC	SRC	Proto-oncogene tyrosine-protein kinase Src	16	11	309298	314717	302000
	P12955	PEPD_HUMAN	PEPD	PEPD	Xaa-Pro dipeptidase	17	17	220607	204895	234666
	P12956	XRCC6_HUMAN	XRCC6	XRCC6	X-ray repair cross-complementing protein 6	37	37	1.98397e+06	2.04605e+06	2.08129e+06
	P13010	XRCC5_HUMAN	XRCC5	XRCC5	X-ray repair cross-complementing protein 5	31	31	1.87795e+06	1.77647e+06	1.99201e+06
	P13051	UNG_HUMAN	UNG	UNG	Uracil-DNA glycosylase	6	6	24635	28441.2	20593.6
	P13056	NR2C1_HUMAN	NR2C1	NR2C1	Nuclear receptor subfamily 2 group C member 1	6	6	31981.2	32981.4	33006.5
	P13073	COX41_HUMAN	COX4I1	COX4I1	Cytochrome c oxidase subunit 4 isoform 1, mitochondrial	7	7	1.23491e+06	1.31192e+06	1.50398e+06
	P13196	HEM1_HUMAN	ALAS1	ALAS1	5-aminolevulinate synthase, non-specific, mitochondrial	5	5	102133	98858.5	91602.3
	P13473;P13473-2;P13473-3	LAMP2_HUMAN	LAMP2	LAMP2	Lysosome-associated membrane glycoprotein 2	6	6	675943	646034	735788
	P13489	RINI_HUMAN	RNH1	RNH1	Ribonuclease inhibitor	20	20	841545	930660	1.07658e+06
	P13497	BMP1_HUMAN	BMP1	BMP1	Bone morphogenetic protein 1	6	5	17013.7	15963.1	12501.7
	P13591;P13591-1	NCAM1_HUMAN	NCAM1	NCAM1	Neural cell adhesion molecule 1	18	18	143914	138531	133854
	P13611-5;P13611	CSPG2_HUMAN	VCAN	VCAN	Versican core protein	33	33	98900.1	94080.5	93025.2
	P13612	ITA4_HUMAN	ITGA4	ITGA4	Integrin alpha-4	16	16	126080	129803	142205
	P13631;P13631-2;P13631-3;P13631-4	RARG_HUMAN	RARG	RARG	Retinoic acid receptor gamma	1	1	13449.1		11878.5
	P13639	EF2_HUMAN	EEF2	EEF2	Elongation factor 2	49	48	2.65548e+06	3.27558e+06	3.86928e+06
	P13667	PDIA4_HUMAN	PDIA4	PDIA4	Protein disulfide-isomerase A4	42	41	1.45888e+06	1.80906e+06	2.1243e+06
	P13674-2	P4HA1_HUMAN	P4HA1	P4HA1	Isoform 2 of Prolyl 4-hydroxylase subunit alpha-1	21	21	256925	262817	262331
	P13682	ZNF35_HUMAN	ZNF35	ZNF35	Zinc finger protein 35	4	3	20689.3	14526.5	17400.4
	P13693	TCTP_HUMAN	TPT1	TPT1	Translationally-controlled tumor protein	9	8	535107	670807	780141
	P13716;P13716-2	HEM2_HUMAN	ALAD	ALAD	Delta-aminolevulinic acid dehydratase	3	3	41524	43574.9	38695.8
	P13796	PLSL_HUMAN	LCP1	LCP1	Plastin-2	8	8	106506	87116.8	81309.6
	P13797	PLST_HUMAN	PLS3	PLS3	Plastin-3	28	19	627483	639604	667190
	P13798	ACPH_HUMAN	APEH	APEH	Acylamino-acid-releasing enzyme	16	16	298536	276678	339997
	P13804	ETFA_HUMAN	ETFA	ETFA	Electron transfer flavoprotein subunit alpha, mitochondrial	17	17	195758	193905	166638
	P13807;P13807-2	GYS1_HUMAN	GYS1	GYS1	Glycogen [starch] synthase, muscle	14	13	153392	140608	162428
	P13861	KAP2_HUMAN	PRKAR2A	PRKAR2A	cAMP-dependent protein kinase type II-alpha regulatory subunit	16	14	133288	138810	149656
	P13929	ENOB_HUMAN	ENO3	ENO3	Beta-enolase	6	6	5.3249e+06	4.7538e+06	5.0778e+06
	P13984	T2FB_HUMAN	GTF2F2	GTF2F2	General transcription factor IIF subunit 2	17	17	170706	192302	211834
	P13987;P13987-2	CD59_HUMAN	CD59	CD59	CD59 glycoprotein	3	3	262586	356882	464567
	P13994	YJU2B_HUMAN	YJU2B	YJU2B	Probable splicing factor YJU2B	4	4	23099.2	25500.4	20817
	P13995	MTDC_HUMAN	MTHFD2	MTHFD2	Bifunctional methylenetetrahydrofolate dehydrogenase/cyclohydrolase, mitochondrial	13	13	256413	280414	246564
	P14174	MIF_HUMAN	MIF	MIF	Macrophage migration inhibitory factor	2	2	2.46852e+06	2.11558e+06	3.49325e+06
	P14209;P14209-3	CD99_HUMAN	CD99	CD99	CD99 antigen	2	2	1.3651e+06	1.06897e+06	1.73223e+06
	P14314-2	GLU2B_HUMAN	PRKCSH	PRKCSH	Isoform 2 of Glucosidase 2 subunit beta	21	21	1.76594e+06	1.96979e+06	2.18998e+06
	P14316;P14316-2	IRF2_HUMAN	IRF2	IRF2	Interferon regulatory factor 2	1	1		10050	11319.5
	P14317	HCLS1_HUMAN	HCLS1	HCLS1	Hematopoietic lineage cell-specific protein	5	5	26621.7	24373.2	27566.8
	P14324;P14324-2	FPPS_HUMAN	FDPS	FDPS	Farnesyl pyrophosphate synthase	11	11	1.23296e+06	1.23836e+06	1.45097e+06
	P14373	TRI27_HUMAN	TRIM27	TRIM27	Zinc finger protein RFP	11	10	45738.3	42884.2	41619.7
	P14406	CX7A2_HUMAN	COX7A2	COX7A2	Cytochrome c oxidase subunit 7A2, mitochondrial	2	2	464716	440681	555952
	P14415	AT1B2_HUMAN	ATP1B2	ATP1B2	Sodium/potassium-transporting ATPase subunit beta-2	1	1	4618.76	4989.76
	P14543	NID1_HUMAN	NID1	NID1	Nidogen-1	19	18	157195	43715.5	47439.6
	P14550	AK1A1_HUMAN	AKR1A1	AKR1A1	Aldo-keto reductase family 1 member A1	16	16	190247	193872	215384
	P14621	ACYP2_HUMAN	ACYP2	ACYP2	Acylphosphatase-2	4	4	23182.2	21383.8	32220.9
	P14625	ENPL_HUMAN	HSP90B1	HSP90B1	Endoplasmin	47	39	5.75474e+06	6.57554e+06	7.94165e+06
	P14635;P14635-2	CCNB1_HUMAN	CCNB1	CCNB1	G2/mitotic-specific cyclin-B1	7	7	123541	126026	109984
	P14649	MYL6B_HUMAN	MYL6B	MYL6B	Myosin light chain 6B	13	10	2.81985e+06	3.51919e+06	4.41453e+06
	P14678;P14678-2;P14678-3	RSMB_HUMAN	SNRPB	SNRPB	Small nuclear ribonucleoprotein-associated proteins B and B'	7	1	585462	997371	1.0632e+06
	P14735	IDE_HUMAN	IDE	IDE	Insulin-degrading enzyme	38	38	173141	180127	190305
	P14854	CX6B1_HUMAN	COX6B1	COX6B1	Cytochrome c oxidase subunit 6B1	7	7	155047	193190	240948
	P14859;P14859-2;P14859-3;P14859-4;P14859-5;P14859-6	PO2F1_HUMAN	POU2F1	POU2F1	POU domain, class 2, transcription factor 1	7	2	131014	142559	101926
	P14868	SYDC_HUMAN	DARS1	DARS1	Aspartate--tRNA ligase, cytoplasmic	34	34	842884	872557	940113
	P14921	ETS1_HUMAN	ETS1	ETS1	Protein C-ets-1	7	6	44152.5	44346	48689.4
	P14923	PLAK_HUMAN	JUP	JUP	Junction plakoglobin	22	22	137055	149244	134881
	P14927	QCR7_HUMAN	UQCRB	UQCRB	Cytochrome b-c1 complex subunit 7	7	7	812241	740338	1.0553e+06
	P15056	BRAF_HUMAN	BRAF	BRAF	Serine/threonine-protein kinase B-raf	6	6	16857.5	21388.7	20353.8
	P15104	GLNA_HUMAN	GLUL	GLUL	Glutamine synthetase	10	10	127223	124341	133859
	P15121	ALDR_HUMAN	AKR1B1	AKR1B1	Aldo-keto reductase family 1 member B1	17	16	456095	524509	610050
	P15144	AMPN_HUMAN	ANPEP	ANPEP	Aminopeptidase N	12	12	18889.2	17664.6	16816.4
	P15151;P15151-2;P15151-3	PVR_HUMAN	PVR	PVR	Poliovirus receptor	6	6	41571	39225.7	45858.3
	P15153	RAC2_HUMAN	RAC2	RAC2	Ras-related C3 botulinum toxin substrate 2	1	1	7360.83
	P15170-2;P15170-3	ERF3A_HUMAN	GSPT1	GSPT1	Isoform 2 of Eukaryotic peptide chain release factor GTP-binding subunit ERF3A	23	11	382788	451214	509795
	P15259	PGAM2_HUMAN	PGAM2	PGAM2	Phosphoglycerate mutase 2	1	1	23565.6	17200.3
Yes	P15260	INGR1_HUMAN	IFNGR1	IFNGR1	Interferon gamma receptor 1	5	5	27158.1	29891.9	31263.1
	P15289;P15289-2	ARSA_HUMAN	ARSA	ARSA	Arylsulfatase A	3	3	69714.3	76427.4	65031.4
	P15291;P15291-2	B4GT1_HUMAN	B4GALT1	B4GALT1	Beta-1,4-galactosyltransferase 1	2	2	15072.1	16947.3	18793.6
	P15309;P15309-2;P15309-3	PPAP_HUMAN	ACP3	ACP3	Prostatic acid phosphatase	2	2	6042.67	3700.18	4395.14
	P15311	EZRI_HUMAN	EZR	EZR	Ezrin	26	24	708989	705528	864294
	P15328	FOLR1_HUMAN	FOLR1	FOLR1	Folate receptor alpha	1	1	7403.08
	P15336;P15336-5	ATF2_HUMAN	ATF2	ATF2	Cyclic AMP-dependent transcription factor ATF-2	9	6	77529.7	68316.5	71932.2
	P15374	UCHL3_HUMAN	UCHL3	UCHL3	Ubiquitin carboxyl-terminal hydrolase isozyme L3	11	11	302342	284149	320127
	P15408;P15408-3	FOSL2_HUMAN	FOSL2	FOSL2	Fos-related antigen 2	4	4	55159.4	50822.5	62302.6
	P15529-2;P15529-3;P15529-4;P15529-5;P15529-6;P15529-7	MCP_HUMAN	CD46	CD46	Isoform B of Membrane cofactor protein	1	1	44164.6	38516.5	37887.2
	P15529;P15529-10;P15529-11;P15529-12;P15529-13;P15529-14;P15529-15	MCP_HUMAN	CD46	CD46	Membrane cofactor protein	2	2	121767	122322	111086
	P15531;P15531-2	NDKA_HUMAN	NME1	NME1	Nucleoside diphosphate kinase A	9	1	3.00087e+06	3.75588e+06	4.04285e+06
	P15559;P15559-2;cRAP-P15559	NQO1_HUMAN;cRAP-NQO1_HUMAN	NQO1;cRAP-NQO1	NQO1	NAD(P)H dehydrogenase [quinone] 1	8	0	153930	155989	139437
	P15586;P15586-2	GNS_HUMAN	GNS	GNS	N-acetylglucosamine-6-sulfatase	8	8	197996	207417	244991
	P15622-3	ZN250_HUMAN	ZNF250	ZNF250	Isoform 3 of Zinc finger protein 250	10	8	22303.3	18735.9	16665.8
	P15735;P15735-2	PHKG2_HUMAN	PHKG2	PHKG2	Phosphorylase b kinase gamma catalytic chain, liver/testis isoform	9	9	57139.8	58328.7	50932.3
	P15822	ZEP1_HUMAN	HIVEP1	HIVEP1	Zinc finger protein 40	12	11	13139.5	12121.2	12045.4
	P15848	ARSB_HUMAN	ARSB	ARSB	Arylsulfatase B	14	14	207617	235599	254749
	P15880	RS2_HUMAN	RPS2	RPS2	Small ribosomal subunit protein uS5	10	10	1.95986e+06	1.86275e+06	2.04484e+06
	P15882;P15882-3	CHIN_HUMAN	CHN1	CHN1	N-chimaerin	13	13	118472	129879	130902
	P15884-3;P15884-4	ITF2_HUMAN	TCF4	TCF4	Isoform SEF2-1D of Transcription factor 4	1	1	31653.2	28581.8	28462.2
	P15884;P15884-5	ITF2_HUMAN	TCF4	TCF4	Transcription factor 4	6	6	63783.3	60151.6	52548.4
	P15907	SIAT1_HUMAN	ST6GAL1	ST6GAL1	Beta-galactoside alpha-2,6-sialyltransferase 1	2	2	102613	93249.3
	P15923-2	TFE2_HUMAN	TCF3	TCF3	Isoform E47 of Transcription factor E2-alpha	13	13	120241	111169	116539
	P15924	DESP_HUMAN	DSP	DSP	Desmoplakin	140	140	432373	423253	431185
	P15927;P15927-2;P15927-3	RFA2_HUMAN	RPA2	RPA2	Replication protein A 32 kDa subunit	7	7	468015	486947	510586
	P15954	COX7C_HUMAN	COX7C	COX7C	Cytochrome c oxidase subunit 7C, mitochondrial	1	1	319563	283651	526430
	P16035	TIMP2_HUMAN	TIMP2	TIMP2	Metalloproteinase inhibitor 2	1	1	112208	97435.8	106108
	P16070-14;P16070-7;P16070;P16070-10;P16070-11;P16070-12;P16070-13;P16070-16;P16070-17;P16070-18;P16070-3;P16070-4;P16070-5;P16070-6;P16070-8	CD44_HUMAN	CD44	CD44	CD44 antigen	5	5	103625	95979.3	109966
	P16083;cRAP-P16083	NQO2_HUMAN;cRAP-NQO2_HUMAN	NQO2;cRAP-NQO2	NQO2	Ribosyldihydronicotinamide dehydrogenase [quinone]	11	0	138856	141950	135886
	P16104	H2AX_HUMAN	H2AX	H2AX	Histone H2AX	6	1	8.01707e+06	9.40231e+06	9.97978e+06
	P16152	CBR1_HUMAN	CBR1	CBR1	Carbonyl reductase [NADPH] 1	12	10	302547	288610	294811
	P16219	ACADS_HUMAN	ACADS	ACADS	Short-chain specific acyl-CoA dehydrogenase, mitochondrial	5	5	27809.8	17815	25909.9
	P16220-1	CREB1_HUMAN	CREB1	CREB1	Isoform 2 of Cyclic AMP-responsive element-binding protein 1	4	3	426501	411199	519666
	P16234	PGFRA_HUMAN	PDGFRA	PDGFRA	Platelet-derived growth factor receptor alpha	3	3	15309.5	14079.3	16730.9
	P16278;P16278-3	BGAL_HUMAN	GLB1	GLB1	Beta-galactosidase	14	13	97673.4	99962.4	113937
	P16284;P16284-2;P16284-3;P16284-6	PECA1_HUMAN	PECAM1	PECAM1	Platelet endothelial cell adhesion molecule	4	4	18549.9	20498.6	16036.4
	P16298;P16298-4	PP2BB_HUMAN	PPP3CB	PPP3CB	Serine/threonine-protein phosphatase 2B catalytic subunit beta isoform	15	8	279324	269459	280543
	P16333	NCK1_HUMAN	NCK1	NCK1	SH2/SH3 adapter protein NCK1	13	13	85680.9	88377.4	87735.9
	P16383	GCFC2_HUMAN	GCFC2	GCFC2	Intron Large complex component GCFC2	19	19	95331	91734.9	86861.8
	P16401	H15_HUMAN	H1-5	H1-5	Histone H1.5	9	7	8.85137e+06	8.7359e+06	1.15654e+07
	P16402	H13_HUMAN	H1-3	H1-3	Histone H1.3	1	1	13590.9	14701.4	14463.1
	P16403	H12_HUMAN	H1-2	H1-2	Histone H1.2	8	2	7.20285e+06	7.68822e+06	9.64531e+06
Yes	P16422	EPCAM_HUMAN	EPCAM	EPCAM	Epithelial cell adhesion molecule	3	3	21265.2	15563.1	21860.8
	P16435	NCPR_HUMAN	POR	POR	NADPH--cytochrome P450 reductase	19	19	236090	229406	204114
	P16455	MGMT_HUMAN	MGMT	MGMT	Methylated-DNA--protein-cysteine methyltransferase	8	8	75472.5	83314	82581.7
	P16591	FER_HUMAN	FER	FER	Tyrosine-protein kinase Fer	7	6	18265.5	20783.8	22596
	P16615	AT2A2_HUMAN	ATP2A2	ATP2A2	Sarcoplasmic/endoplasmic reticulum calcium ATPase 2	32	21	433839	453406	436780
	P16870;P16870-2	CBPE_HUMAN	CPE	CPE	Carboxypeptidase E	4	4	17217.7	16601.2	14273
	P16885	PLCG2_HUMAN	PLCG2	PLCG2	1-phosphatidylinositol 4,5-bisphosphate phosphodiesterase gamma-2	14	14	102169	92271.1	108437
	P16930	FAAA_HUMAN	FAH	FAH	Fumarylacetoacetase	8	8	63283.8	73932	89787.5
	P16949	STMN1_HUMAN	STMN1	STMN1	Stathmin	15	10	5.147e+06	4.19743e+06	7.72447e+06
	P16989	YBOX3_HUMAN	YBX3	YBX3	Y-box-binding protein 3	8	8	914072	738968	723625
	P17019	ZN708_HUMAN	ZNF708	ZNF708	Zinc finger protein 708	2	1	8951.3	9640.61	7353.93
	P17020	ZNF16_HUMAN	ZNF16	ZNF16	Zinc finger protein 16	1	1	10441.9	8405.09	8079.76
	P17026	ZNF22_HUMAN	ZNF22	ZNF22	Zinc finger protein 22	6	6	56041.8	95878.2	74082.2
	P17028	ZNF24_HUMAN	ZNF24	ZNF24	Zinc finger protein 24	11	10	108150	112731	102701
	P17029	ZKSC1_HUMAN	ZKSCAN1	ZKSCAN1	Zinc finger protein with KRAB and SCAN domains 1	7	7	26716.9	27604.3	25938.1
	P17036	ZNF3_HUMAN	ZNF3	ZNF3	Zinc finger protein 3	7	6	33098.5	32970.2	35900.9
	P17041	ZNF32_HUMAN	ZNF32	ZNF32	Zinc finger protein 32	3	3	44221	54802.4	56509.4
	P17050	NAGAB_HUMAN	NAGA	NAGA	Alpha-N-acetylgalactosaminidase	5	5	123339	120533	117519
	P17066	HSP76_HUMAN	HSPA6	HSPA6	Heat shock 70 kDa protein 6	5	0	1.10091e+06	1.07638e+06	1.4821e+06
	P17096	HMGA1_HUMAN	HMGA1	HMGA1	High mobility group protein HMG-I/HMG-Y	6	5	3.99553e+06	3.52395e+06	4.75582e+06
	P17097;P17097-2	ZNF7_HUMAN	ZNF7	ZNF7	Zinc finger protein 7	2	2		2626.29	3422.1
	P17098	ZNF8_HUMAN	ZNF8	ZNF8	Zinc finger protein 8	10	9	42794.9	39089	40376.2
	P17152	TMM11_HUMAN	TMEM11	TMEM11	Transmembrane protein 11, mitochondrial	4	4	42229.5	40926.7	42060.8
	P17174	AATC_HUMAN	GOT1	GOT1	Aspartate aminotransferase, cytoplasmic	20	20	482481	527202	568490
	P17252	KPCA_HUMAN	PRKCA	PRKCA	Protein kinase C alpha type	3	2		33783.5	39500.5
	P17275	JUNB_HUMAN	JUNB	JUNB	Transcription factor JunB	5	5	36031.3	34066	32536.9
	P17302	CXA1_HUMAN	GJA1	GJA1	Gap junction alpha-1 protein	12	12	367385	382404	362463
	P17342;P17342-2	ANPRC_HUMAN	NPR3	NPR3	Atrial natriuretic peptide receptor 3	6	6	8563.85	8407.37	7415.38
	P17405;P17405-2;P17405-3;P17405-4	ASM_HUMAN	SMPD1	SMPD1	Sphingomyelin phosphodiesterase	1	1	21878.8	24369.5	25159.2
	P17480	UBF1_HUMAN	UBTF	UBTF	Nucleolar transcription factor 1	21	21	338252	331733	295291
	P17481	HXB8_HUMAN	HOXB8	HOXB8	Homeobox protein Hox-B8	4	3	43656.2	42704.9	40487.9
	P17482	HXB9_HUMAN	HOXB9	HOXB9	Homeobox protein Hox-B9	7	6	110472	81280.8	83688
	P17509	HXB6_HUMAN	HOXB6	HOXB6	Homeobox protein Hox-B6	4	4	65518.1	64916.2	46618.4
	P17535	JUND_HUMAN	JUND	JUND	Transcription factor JunD	7	7	136692	132946	188894
	P17544;P17544-1;P17544-2;P17544-3;P17544-4	ATF7_HUMAN	ATF7	ATF7	Cyclic AMP-dependent transcription factor ATF-7	4	0	19737.4	16210.7	13555.5
	P17568	NDUB7_HUMAN	NDUFB7	NDUFB7	NADH dehydrogenase [ubiquinone] 1 beta subcomplex subunit 7	4	4	70373.2	92958.2	88052.5
	P17600;P17600-2	SYN1_HUMAN	SYN1	SYN1	Synapsin-1	1	1	4730.41		3575.95
	P17612;P17612-2	KAPCA_HUMAN	PRKACA	PRKACA	cAMP-dependent protein kinase catalytic subunit alpha	12	4	159883	161517	177302
	P17655	CAN2_HUMAN	CAPN2	CAPN2	Calpain-2 catalytic subunit	20	20	252708	245837	269476
	P17661	DESM_HUMAN	DES	DES	Desmin	16	16	136941	136585	141220
	P17677;P17677-2	NEUM_HUMAN	GAP43	GAP43	Neuromodulin	12	12	393704	294107	394559
	P17706	PTN2_HUMAN	PTPN2	PTPN2	Tyrosine-protein phosphatase non-receptor type 2	12	12	95953.1	95652.1	87268.4
	P17707	DCAM_HUMAN	AMD1	AMD1	S-adenosylmethionine decarboxylase proenzyme	7	7	41572.3	44357.6	50523.3
	P17812	PYRG1_HUMAN	CTPS1	CTPS1	CTP synthase 1	28	26	544685	525052	572048
	P17813;P17813-2	EGLN_HUMAN	ENG	ENG	Endoglin	6	6	52199.6	47130.3	54123
	P17844	DDX5_HUMAN	DDX5	DDX5	Probable ATP-dependent RNA helicase DDX5	24	24	1.14262e+06	1.10274e+06	1.20281e+06
	P17858	PFKAL_HUMAN	PFKL	PFKL	ATP-dependent 6-phosphofructokinase, liver type	19	19	159119	172483	168367
	P17900	SAP3_HUMAN	GM2A	GM2A	Ganglioside GM2 activator	4	4	119884	148753	173076
	P17931	LEG3_HUMAN	LGALS3	LGALS3	Galectin-3	8	8	245639	229789	276550
	P17948	VGFR1_HUMAN	FLT1	FLT1	Vascular endothelial growth factor receptor 1	9	8	17231.7	19354.8	19761.8
	P17980	PRS6A_HUMAN	PSMC3	PSMC3	26S proteasome regulatory subunit 6A	22	22	785191	853773	872915
	P17987	TCPA_HUMAN	TCP1	TCP1	T-complex protein 1 subunit alpha	31	31	1.11404e+06	1.19424e+06	1.37974e+06
	P18031	PTN1_HUMAN	PTPN1	PTPN1	Tyrosine-protein phosphatase non-receptor type 1	21	21	161084	179372	147532
	P18065	IBP2_HUMAN	IGFBP2	IGFBP2	Insulin-like growth factor-binding protein 2	10	10	71875.8	85121.3	92572.2
	P18074	ERCC2_HUMAN	ERCC2	ERCC2	General transcription and DNA repair factor IIH helicase subunit XPD	13	13	35856.1	35869.4	37544
	P18075	BMP7_HUMAN	BMP7	BMP7	Bone morphogenetic protein 7	3	3	43156.6	31385.1	32204.8
	P18077	RL35A_HUMAN	RPL35A	RPL35A	Large ribosomal subunit protein eL33	9	9	970432	1.23709e+06	1.8049e+06
	P18084	ITB5_HUMAN	ITGB5	ITGB5	Integrin beta-5	14	14	76323.8	71202.9	62743.6
	P18085	ARF4_HUMAN	ARF4	ARF4	ADP-ribosylation factor 4	5	5	440660	462131	480098
	P18124	RL7_HUMAN	RPL7	RPL7	Large ribosomal subunit protein uL30	15	15	1.36528e+06	1.4136e+06	1.89755e+06
	P18206;P18206-2	VINC_HUMAN	VCL	VCL	Vinculin	62	62	1.64653e+06	1.82594e+06	1.9609e+06
	P18433;P18433-6	PTPRA_HUMAN	PTPRA	PTPRA	Receptor-type tyrosine-protein phosphatase alpha	8	7	35831.7	34656.5	31865.9
	P18440	ARY1_HUMAN	NAT1	NAT1	Arylamine N-acetyltransferase 1	3	3	16763.5	24558.9	21477.7
	P18583-5	SON_HUMAN	SON	SON	Isoform D of Protein SON	34	34	603510	561427	585649
	P18615	NELFE_HUMAN	NELFE	NELFE	Negative elongation factor E	14	14	147157	140986	171932
	P18621;P18621-3	RL17_HUMAN	RPL17	RPL17	Large ribosomal subunit protein uL22	9	0	1.57126e+06	1.67089e+06	1.68133e+06
	P18669	PGAM1_HUMAN	PGAM1	PGAM1	Phosphoglycerate mutase 1	16	8	2.36582e+06	2.99828e+06	2.96482e+06
	P18754;P18754-2	RCC1_HUMAN	RCC1	RCC1	Regulator of chromosome condensation	16	16	670936	693141	658945
	P18827	SDC1_HUMAN	SDC1	SDC1	Syndecan-1	5	5	765950	565971	764507
	P18846	ATF1_HUMAN	ATF1	ATF1	Cyclic AMP-dependent transcription factor ATF-1	1	1	66812.8	58707.2	53852.3
	P18847;P18847-5	ATF3_HUMAN	ATF3	ATF3	Cyclic AMP-dependent transcription factor ATF-3	4	4	27453.5	27088.7	25457.1
	P18850	ATF6A_HUMAN	ATF6	ATF6	Cyclic AMP-dependent transcription factor ATF-6 alpha	9	9	23718	20232.8	16546.3
	P18858	DNLI1_HUMAN	LIG1	LIG1	DNA ligase 1	31	31	152032	146695	140285
	P18859;P18859-2	ATP5J_HUMAN	ATP5PF	ATP5PF	ATP synthase-coupling factor 6, mitochondrial	7	7	1.06745e+06	946256	1.00452e+06
	P18887	XRCC1_HUMAN	XRCC1	XRCC1	DNA repair protein XRCC1	16	16	137629	158014	151373
	P19021;P19021-2;P19021-3;P19021-4;P19021-5;P19021-6	AMD_HUMAN	PAM	PAM	Peptidyl-glycine alpha-amidating monooxygenase	8	8	24325.5	26384.8	22391.9
	P19022	CADH2_HUMAN	CDH2	CDH2	Cadherin-2	22	20	591979	552470	614081
	P19086	GNAZ_HUMAN	GNAZ	GNAZ	Guanine nucleotide-binding protein G(z) subunit alpha	1	1	16423.4	20699.5
	P19174	PLCG1_HUMAN	PLCG1	PLCG1	1-phosphatidylinositol 4,5-bisphosphate phosphodiesterase gamma-1	37	37	567833	592699	621422
	P19174-2	PLCG1_HUMAN	PLCG1	PLCG1	Isoform 2 of 1-phosphatidylinositol 4,5-bisphosphate phosphodiesterase gamma-1	1	1	140066	141212	110197
	P19256;P19256-2;P19256-3	LFA3_HUMAN	CD58	CD58	Lymphocyte function-associated antigen 3	1	1	36655.2	31529	37254.8
	P19320;P19320-3	VCAM1_HUMAN	VCAM1	VCAM1	Vascular cell adhesion protein 1	3	3	6786.46	7758.51	8313.96
	P19338	NUCL_HUMAN	NCL	NCL	Nucleolin	1	1	1.65102e+06	2.05637e+06	2.22225e+06
	P19367-3	HXK1_HUMAN	HK1	HK1	Isoform 3 of Hexokinase-1	34	29	211434	219241	230010
	P19387	RPB3_HUMAN	POLR2C	POLR2C	DNA-directed RNA polymerase II subunit RPB3	9	9	218042	215315	238381
	P19388	RPAB1_HUMAN	POLR2E	POLR2E	DNA-directed RNA polymerases I, II, and III subunit RPABC1	6	6	154191	194947	317127
	P19404	NDUV2_HUMAN	NDUFV2	NDUFV2	NADH dehydrogenase [ubiquinone] flavoprotein 2, mitochondrial	7	7	317621	281201	325467
	P19419	ELK1_HUMAN	ELK1	ELK1	ETS domain-containing protein Elk-1	1	1		8476.96	9507.24
	P19438;P19438-2;P19438-3	TNR1A_HUMAN	TNFRSF1A	TNFRSF1A	Tumor necrosis factor receptor superfamily member 1A	1	1		34026.1
	P19447	ERCC3_HUMAN	ERCC3	ERCC3	General transcription and DNA repair factor IIH helicase/translocase subunit XPB	12	12	35604.3	31797.5	33847.6
	P19474	RO52_HUMAN	TRIM21	TRIM21	E3 ubiquitin-protein ligase TRIM21	8	8	42241.5	48381.2	51631.4
	P19525	E2AK2_HUMAN	EIF2AK2	EIF2AK2	Interferon-induced, double-stranded RNA-activated protein kinase	17	17	171349	174038	167375
	P19532	TFE3_HUMAN	TFE3	TFE3	Transcription factor E3	7	5	48596.8	52938	64024.1
	P19622;Q05925	HME1_HUMAN;HME2_HUMAN	EN1;EN2	EN1	Homeobox protein engrailed-2	1	0	9202.6	8558.11	8488.74
	P19623	SPEE_HUMAN	SRM	SRM	Spermidine synthase	9	9	237432	307550	388636
	P19634	SL9A1_HUMAN	SLC9A1	SLC9A1	Sodium/hydrogen exchanger 1	4	4	56154.4	53524.2	56028.8
	P19784	CSK22_HUMAN	CSNK2A2	CSNK2A2	Casein kinase II subunit alpha'	14	14	136270	126552	123802
	P19793;P19793-2	RXRA_HUMAN	RXRA	RXRA	Retinoic acid receptor RXR-alpha	11	4	38608.8	41389.7	36199.4
	P19838;P19838-2	NFKB1_HUMAN	NFKB1	NFKB1	Nuclear factor NF-kappa-B p105 subunit	15	15	88169.9	94572.5	93696.2
	P19883;P19883-2	FST_HUMAN	FST	FST	Follistatin	4	4	24858.9	21424.7	20388.9
	P20020;P20020-1;P20020-4;P20020-6	AT2B1_HUMAN	ATP2B1	ATP2B1	Plasma membrane calcium-transporting ATPase 1	31	18	296402	278442	243561
	P20042	IF2B_HUMAN	EIF2S2	EIF2S2	Eukaryotic translation initiation factor 2 subunit 2	23	23	540853	568784	682368
	P20062;P20062-2	TCO2_HUMAN	TCN2	TCN2	Transcobalamin-2	2	2	8128.66	8296.59	8035.92
	P20073;P20073-2	ANXA7_HUMAN	ANXA7	ANXA7	Annexin A7	14	14	254962	271992	307279
	P20226;P20226-2	TBP_HUMAN	TBP	TBP	TATA-box-binding protein	3	2	27313.5	30214.5	40582.3
	P20248	CCNA2_HUMAN	CCNA2	CCNA2	Cyclin-A2	8	8	196639	169224	194996
	P20264	PO3F3_HUMAN	POU3F3	POU3F3	POU domain, class 3, transcription factor 3	1	1		10135.5
	P20265	PO3F2_HUMAN	POU3F2	POU3F2	POU domain, class 3, transcription factor 2	5	2	43785.1	43056.5	42995.8
	P20290	BTF3_HUMAN	BTF3	BTF3	Transcription factor BTF3	7	7	2.09683e+06	2.10969e+06	2.20703e+06
	P20336	RAB3A_HUMAN	RAB3A	RAB3A	Ras-related protein Rab-3A	1	1	26527.7		39575.2
[truncated: 7,290 more rows]

## Sheet: iPSC_markers.pg_matrix
Marker	Protein.Group	Protein.Names	Genes	Genes1	First.Protein.Description	N.Sequences	N.Proteotypic.Sequences	C:\timsTOFdata\Tiara_iPSCs_markertest\TW_WT_1_iPSCs_DIAod_60m_5th_4ul_Slot1-10_1_10430.d	C:\timsTOFdata\Tiara_iPSCs_markertest\TW_WT_2_iPSCs_DIAod_60m_5th_4ul_Slot1-12_1_10437.d	C:\timsTOFdata\Tiara_iPSCs_markertest\TW_WT_3_iPSCs_DIAod_60m_5th_5ul_Slot1-14_1_10447.d
Yes	O00571	DDX3X_HUMAN	DDX3X	DDX3X	ATP-dependent RNA helicase DDX3X	31	10	773339	811245	827555
Yes	O00592;O00592-2	PODXL_HUMAN	PODXL	PODXL	Podocalyxin	11	11	662673	625977	782289
Yes	O43490;O43490-2;O43490-3;O43490-4;O43490-5;O43490-6;O43490-7	PROM1_HUMAN	PROM1	PROM1	Prominin-1	15	15	36024.6	35426.7	33379.5
Yes	O60879;O60879-2;O60879-3	DIAP2_HUMAN	DIAPH2	DIAPH2	Protein diaphanous homolog 2	12	12	55517.2	53821.9	51873.7
Yes	P04049;P04049-2	RAF1_HUMAN	RAF1	RAF1	RAF proto-oncogene serine/threonine-protein kinase	14	8	105605	96146.4	86471.3
Yes	P05186	PPBT_HUMAN	ALPL	ALPL	Alkaline phosphatase, tissue-nonspecific isozyme	13	13	314826	272929	302182
Yes	P05556	ITB1_HUMAN	ITGB1	ITGB1	Integrin beta-1	21	21	822196	860424	850317
Yes	P08047;P08047-2;P08047-3	SP1_HUMAN	SP1	SP1	Transcription factor Sp1	3	3	22902.5	28148.1	23325.9
Yes	P09038;P09038-1;P09038-2;P09038-3	FGF2_HUMAN	FGF2	FGF2	Fibroblast growth factor 2	5	5	1.06282e+06	1.36455e+06	1.6252e+06
Yes	P10721;P10721-2	KIT_HUMAN	KIT	KIT	Mast/stem cell growth factor receptor Kit	2	2	6648.86	5112.28	5356.9
Yes	P12830	CADH1_HUMAN	CDH1	CDH1	Cadherin-1	4	4	19933.4	16935	16197.6
Yes	P15260	INGR1_HUMAN	IFNGR1	IFNGR1	Interferon gamma receptor 1	5	5	27158.1	29891.9	31263.1
Yes	P16422	EPCAM_HUMAN	EPCAM	EPCAM	Epithelial cell adhesion molecule	3	3	21265.2	15563.1	21860.8
Yes	P22466	GALA_HUMAN	GAL	GAL	Galanin peptides	2	2	27775.1	22564.8	29537.7
Yes	P23229;P23229-3;P23229-5	ITA6_HUMAN	ITGA6	ITGA6	Integrin alpha-6	16	16	40970.9	35422.4	38875.3
Yes	P24530;P24530-3	EDNRB_HUMAN	EDNRB	EDNRB	Endothelin receptor type B	2	2	10774.6	10347.1	16498.5
Yes	P28482	MK01_HUMAN	MAPK1	MAPK1	Mitogen-activated protein kinase 1	15	11	247193	247460	292654
Yes	P29323;P29323-2;P29323-3	EPHB2_HUMAN	EPHB2	EPHB2	Ephrin type-B receptor 2	11	10	366672	361534	290112
Yes	P29373	RABP2_HUMAN	CRABP2	CRABP2	Cellular retinoic acid-binding protein 2	8	8	1.26486e+06	1.15482e+06	1.2644e+06
Yes	P35222	CTNB1_HUMAN	CTNNB1	CTNNB1	Catenin beta-1	30	25	494935	533050	448656
Yes	P40763-2	STAT3_HUMAN	STAT3	STAT3	Isoform Del-701 of Signal transducer and activator of transcription 3	1	1	12613.6	9969.09	9633.12
Yes	P42224	STAT1_HUMAN	STAT1	STAT1	Signal transducer and activator of transcription 1-alpha/beta	25	25	161999	158304	164646
Yes	P42702	LIFR_HUMAN	LIFR	LIFR	Leukemia inhibitory factor receptor	6	6	21699.3	17361.9	17541.4
Yes	P42771;P42771-4	CDN2A_HUMAN	CDKN2A	CDKN2A	Cyclin-dependent kinase inhibitor 2A	4	1	130519	143515	101849
Yes	P46531	NOTC1_HUMAN	NOTCH1	NOTCH1	Neurogenic locus notch homolog protein 1	9	9	29372.7	34222.8	38269.5
Yes	P48431	SOX2_HUMAN	SOX2	SOX2	Transcription factor SOX-2	4	3	522962	459430	694889
Yes	P49757;P49757-3	NUMB_HUMAN	NUMB	NUMB	Protein numb homolog	12	9	53037.7	50585.5	51611
Yes	P49841-2	GSK3B_HUMAN	GSK3B	GSK3B	Isoform 2 of Glycogen synthase kinase-3 beta	19	15	117418	120299	134545
Yes	P52951	GBX2_HUMAN	GBX2	GBX2	Homeobox protein GBX-2	4	3	7892.47	6873.15	6121.97
Yes	P60484;P60484-2	PTEN_HUMAN	PTEN	PTEN	Phosphatidylinositol 3,4,5-trisphosphate 3-phosphatase and dual-specificity protein phosphatase PTEN	6	6	45795.5	42766.2	40730
Yes	P78504	JAG1_HUMAN	JAG1	JAG1	Protein jagged-1	14	14	216194	197473	217551
Yes	Q01629	IFM2_HUMAN	IFITM2	IFITM2	Interferon-induced transmembrane protein 2	1	1	5622.47	13175.4	8551.06
Yes	Q01860	PO5F1_HUMAN	POU5F1	POU5F1	POU domain, class 5, transcription factor 1	3	2	31054.6	18085.2	23721
Yes	Q02750	MP2K1_HUMAN	MAP2K1	MAP2K1	Dual specificity mitogen-activated protein kinase kinase 1	5	5	280433	341183	317789
Yes	Q09472	EP300_HUMAN	EP300	EP300	Histone acetyltransferase p300	11	11	340660	365025	337066
Yes	Q13127	REST_HUMAN	REST	REST	RE1-silencing transcription factor	9	9	30521	26738.6	26216.6
Yes	Q13464	ROCK1_HUMAN	ROCK1	ROCK1	Rho-associated protein kinase 1	37	37	216628	209068	226415
Yes	Q14451;Q14451-2;Q14451-3;Q14451-4	GRB7_HUMAN	GRB7	GRB7	Growth factor receptor-bound protein 7	2	2	26734.5	23166.1	30272
Yes	Q14563	SEM3A_HUMAN	SEMA3A	SEMA3A	Semaphorin-3A	3	3	6214.84	6241.08	6171.85
Yes	Q15406;Q15406-2;Q15406-3	NR6A1_HUMAN	NR6A1	NR6A1	Nuclear receptor subfamily 6 group A member 1	7	7	36614.2	32957.4	28749
Yes	Q15583;Q15583-2;Q15583-3;Q15583-4	TGIF1_HUMAN	TGIF1	TGIF1	Homeobox protein TGIF1	4	1	48077.1	40856.4	38267.3
Yes	Q16644	MAPK3_HUMAN	MAPKAPK3	MAPKAPK3	MAP kinase-activated protein kinase 3	5	5	14363.9	15413	17369.9
Yes	Q6NYC1;Q6NYC1-2;Q6NYC1-3	JMJD6_HUMAN	JMJD6	JMJD6	Bifunctional arginine demethylase and lysyl-hydroxylase JMJD6	7	7	47441.1	43002.3	50921.3
Yes	Q8TDN6	BRX1_HUMAN	BRIX1	BRIX1	Ribosome biogenesis protein BRX1 homolog	13	13	103773	109023	89226.5
Yes	Q92793	CBP_HUMAN	CREBBP	CREBBP	CREB-binding protein	31	15	83125.6	77018.5	84222.5
Yes	Q92908;Q92908-2	GATA6_HUMAN	GATA6	GATA6	Transcription factor GATA-6	3	3	10808.1	12754.1	12419.8
Yes	Q96HF1	SFRP2_HUMAN	SFRP2	SFRP2	Secreted frizzled-related protein 2	2	2	26407.7	23956.8	20902.1
Yes	Q99626	CDX2_HUMAN	CDX2	CDX2	Homeobox protein CDX-2	3	2	95545.2	96597	90230.6
Yes	Q9BVP2;Q9BVP2-2	GNL3_HUMAN	GNL3	GNL3	Guanine nucleotide-binding protein-like 3	18	17	150702	155541	179653
Yes	Q9UBC3	DNM3B_HUMAN	DNMT3B	DNMT3B	DNA (cytosine-5)-methyltransferase 3B	15	15	71142.2	73883.9	65395.7
Yes	Q9UBI1	COMD3_HUMAN	COMMD3	COMMD3	COMM domain-containing protein 3	7	2	59919.6	62217.4	66868.7
Yes	Q9UNQ0	ABCG2_HUMAN	ABCG2	ABCG2	Broad substrate specificity ATP-binding cassette transporter ABCG2	4	4	18355.2	15106.2	10936.1
