# Supplementary material for: Deep Proteomic Profiling of Human Stem Cell-Derived Microglia: Insights Into Inflammatory and Alcohol-Induced Reactivity
Source: Research Square preprint supplement (doi:10.21203/rs.3.rs-7983368/v1), 2025-11-17
Supplement: Supplementary file 2 [file 70af9614c26eb07a0d884b6c.xlsx]

## Sheet: S2
Protein_Group	Protein_Group_1	Protein_Names	Genes	Genes_1	First_Protein_Description	Avg Ratio iMGL EtOH v C	Welch's T-test iMGL EtOH v C	T-test diff iMGL EtOH v C	Z-score iMGL EtOH v C	iMGL Cnrtl_1	iMGL Cnrtl_2	iMGL Cnrtl_3	iMGL EtOH_1	iMGL EtOH_2	iMGL EtOH_3	Log2 iMGL Cnrtl_1	Log2 iMGL Cnrtl_2	Log2 iMGL Cnrtl_3	Log2 iMGL EtOH_1	Log2 iMGL EtOH_2	Log2 iMGL EtOH_3	Welch's T-test Significant EtOH_Cnrtl	Welch's T-test significant	Cluster	GOBP name	GOMF name	GOCC name	KEGG name	#Imputations	-Log Welch's T-test p-value EtOH_Cnrtl	Welch's T-test Difference EtOH_Cnrtl	Welch's T-test Test statistic EtOH_Cnrtl	Protein_Group	Protein_Group_1	Protein_Names	Genes	Genes_1	First_Protein_Description	Original iMGL Cnrtl_1	Original iMGL Cnrtl_2	Original iMGL Cnrtl_3	rep	Original iMGL EtOH_1	Original iMGL EtOH_2	Original iMGL EtOH_3	rep	Genes_1_copyEnd
E9PIE4	E9PIE4	E9PIE4_HUMAN	MTCH2	MTCH2	Mitochondrial carrier 2	0.0747439	2.70002e-05	-3.74316	12.9558	21714.9	24639.6	18558.5	1395.9	1880.64	1575.31	14.4064	14.5887	14.1798	10.447	10.877	10.6214	+	EtOH_Cnrtl	Cluster -223			cellular anatomical entity;membrane		3	4.56863	-3.74316	-21.7637	E9PIE4	E9PIE4	E9PIE4_HUMAN	MTCH2	MTCH2	Mitochondrial carrier 2	21714.9	24639.6	18558.5	3				0	MTCH2
P54198;P54198-2	P54198	HIRA_HUMAN	HIRA	HIRA	Protein HIRA	1.38807	0.00040444	0.473407	1.27743	7207.68	7534.07	7677.5	10182	10579.8	10357.7	12.8153	12.8792	12.9064	13.3137	13.369	13.3384	+	EtOH_Cnrtl	Cluster -224	anatomical structure morphogenesis;aromatic compound biosynthetic process;biological regulation;biosynthetic process;cell differentiation;cellular aromatic compound metabolic process;cellular biosynthetic process;cellular component assembly;cellular component organization;cellular component organization or biogenesis;cellular developmental process;cellular metabolic process;cellular nitrogen comp…	binding;DNA-binding transcription factor binding;histone binding;protein binding;RNA polymerase II-specific DNA-binding transcription factor binding;transcription coregulator activity;transcription corepressor activity;transcription factor binding;transcription regulator activity	cellular anatomical entity;chromatin;extracellular exosome;extracellular membrane-bounded organelle;extracellular organelle;extracellular vesicle;HIR complex;intracellular membrane-bounded organelle;intracellular organelle;membrane-bounded organelle;nuclear body;nucleoplasm;nucleus;organelle;PML body;protein-containing complex;protein-DNA complex;vesicle		0	3.39315	0.473407	15.0859	P54198;P54198-2	P54198	HIRA_HUMAN	HIRA	HIRA	Protein HIRA	7207.68	7534.07	7677.5	3	10182	10579.8	10357.7	3	HIRA
Q5JTZ9	Q5JTZ9	SYAM_HUMAN	AARS2	AARS2	Alanine--tRNA ligase, mitochondrial	0.785662	0.000505771	-0.348228	1.49604	40032.5	39835.8	41067.1	31371.8	31020.8	32621.7	15.2889	15.2818	15.3257	14.9372	14.9209	14.9935	+	EtOH_Cnrtl	Cluster -223	alanyl-tRNA aminoacylation;amino acid activation;amino acid metabolic process;carboxylic acid metabolic process;cellular aromatic compound metabolic process;cellular metabolic process;cellular nitrogen compound metabolic process;cellular process;heterocycle metabolic process;macromolecule metabolic process;metabolic process;mitochondrial alanyl-tRNA aminoacylation;mitochondrial RNA metabolic proc…	adenyl nucleotide binding;adenyl ribonucleotide binding;alanine-tRNA ligase activity;aminoacyl-tRNA editing activity;aminoacyl-tRNA ligase activity;anion binding;ATP binding;binding;carbohydrate derivative binding;carboxylic ester hydrolase activity;catalytic activity;catalytic activity, acting on a nucleic acid;catalytic activity, acting on a tRNA;catalytic activity, acting on RNA;cation binding…	cellular anatomical entity;intracellular membrane-bounded organelle;intracellular organelle;membrane-bounded organelle;mitochondrion;organelle	Aminoacyl-tRNA biosynthesis	0	3.29605	-0.348228	-13.4617	Q5JTZ9	Q5JTZ9	SYAM_HUMAN	AARS2	AARS2	Alanine--tRNA ligase, mitochondrial	40032.5	39835.8	41067.1	3	31371.8	31020.8	32621.7	3	AARS2
Q5TEU4	Q5TEU4	NDUF5_HUMAN	NDUFAF5	NDUFAF5	Arginine-hydroxylase NDUFAF5, mitochondrial	1.16647	0.00110872	0.222174	0.429384	18199.3	17881	17386.1	21313.9	20551.8	20501.2	14.1516	14.1261	14.0856	14.3795	14.327	14.3234	+	EtOH_Cnrtl	Cluster -224	cellular component assembly;cellular component organization;cellular component organization or biogenesis;cellular process;macromolecule metabolic process;macromolecule modification;metabolic process;methylation;mitochondrial respiratory chain complex assembly;mitochondrial respiratory chain complex I assembly;NADH dehydrogenase complex assembly;nitrogen compound metabolic process;organic substan…	catalytic activity;methyltransferase activity;oxidoreductase activity;S-adenosylmethionine-dependent methyltransferase activity;transferase activity;transferase activity, transferring one-carbon groups	cellular anatomical entity;intracellular membrane-bounded organelle;intracellular organelle;lumenal side of membrane;matrix side of mitochondrial inner membrane;membrane;membrane-bounded organelle;mitochondrial inner membrane;mitochondrial membrane;mitochondrion;organelle;organelle inner membrane;organelle membrane;side of membrane		0	2.95518	0.222174	8.41255	Q5TEU4	Q5TEU4	NDUF5_HUMAN	NDUFAF5	NDUFAF5	Arginine-hydroxylase NDUFAF5, mitochondrial	18199.3	17881	17386.1	3	21313.9	20551.8	20501.2	3	NDUFAF5
Q14149	Q14149	MORC3_HUMAN	MORC3	MORC3	MORC family CW-type zinc finger protein 3	1.27681	0.00169818	0.352969	0.870886	26838.2	24767.9	25806.7	32593.3	33955.4	32292.4	14.712	14.5962	14.6555	14.9923	15.0514	14.9789	+	EtOH_Cnrtl	Cluster -224	antiviral innate immune response;biological process involved in interspecies interaction between organisms;biological regulation;cellular metabolic process;cellular process;defense response;defense response to other organism;defense response to symbiont;defense response to virus;immune response;immune system process;innate immune response;localization;macromolecule metabolic process;macromolecule…	ATP hydrolysis activity;binding;catalytic activity;cation binding;DNA binding;histone binding;hydrolase activity;hydrolase activity, acting on acid anhydrides;hydrolase activity, acting on acid anhydrides, in phosphorus-containing anhydrides;ion binding;metal ion binding;methylated histone binding;methylation-dependent protein binding;modification-dependent protein binding;molecular adaptor activ…	cellular anatomical entity;chromatin;intracellular membrane-bounded organelle;intracellular organelle;membrane-bounded organelle;nuclear body;nuclear matrix;nucleoplasm;nucleus;organelle;PML body;protein-containing complex;protein-DNA complex		0	2.77002	0.352969	8.78765	Q14149	Q14149	MORC3_HUMAN	MORC3	MORC3	MORC family CW-type zinc finger protein 3	26838.2	24767.9	25806.7	3	32593.3	33955.4	32292.4	3	MORC3
Q8IX18;Q8IX18-3	Q8IX18	DHX40_HUMAN	DHX40	DHX40	Probable ATP-dependent RNA helicase DHX40	1.16554	0.00188539	0.221118	0.425819	9897.01	9482.45	9969.85	11659.2	11163.9	11384.6	13.2728	13.211	13.2834	13.5092	13.4466	13.4748	+	EtOH_Cnrtl	Cluster -224		adenyl nucleotide binding;adenyl ribonucleotide binding;anion binding;ATP binding;ATP hydrolysis activity;ATP-dependent activity;ATP-dependent activity, acting on RNA;binding;carbohydrate derivative binding;catalytic activity;catalytic activity, acting on a nucleic acid;catalytic activity, acting on RNA;helicase activity;heterocyclic compound binding;hydrolase activity;hydrolase activity, acting …			0	2.7246	0.221118	7.64601	Q8IX18;Q8IX18-3	Q8IX18	DHX40_HUMAN	DHX40	DHX40	Probable ATP-dependent RNA helicase DHX40	9897.01	9482.45	9969.85	3	11659.2	11163.9	11384.6	3	DHX40
Q969F9	Q969F9	HPS3_HUMAN	HPS3	HPS3	BLOC-2 complex member HPS3	4.31423	0.00236737	2.09356	6.74635	80990.6	81473.9	92226.3	333180	315461	450155	16.3055	16.3141	16.4929	18.3459	18.2671	18.7801	+	EtOH_Cnrtl	Cluster -224	cellular component assembly;cellular component organization;cellular component organization or biogenesis;cellular localization;cellular process;establishment of localization;establishment of localization in cell;intracellular transport;localization;melanosome assembly;melanosome organization;organelle assembly;organelle organization;pigment granule organization;platelet dense granule organizatio…		BLOC complex;BLOC-2 complex;cellular anatomical entity;cytoplasm;cytoplasmic vesicle;cytosol;early endosome;endosome;intracellular membrane-bounded organelle;intracellular organelle;intracellular protein-containing complex;intracellular vesicle;membrane-bounded organelle;organelle;protein-containing complex;vesicle		0	2.62573	2.09356	12.2588	Q969F9	Q969F9	HPS3_HUMAN	HPS3	HPS3	BLOC-2 complex member HPS3	80990.6	81473.9	92226.3	3	333180	315461	450155	3	HPS3
Q5JU85	Q5JU85	IQEC2_HUMAN	IQSEC2	IQSEC2	IQ motif and SEC7 domain-containing protein 2	0.7954	0.00297155	-0.330623	1.43661	10877.4	11409.8	11693	9493.12	8775.19	8759.53	13.409	13.478	13.5134	13.2127	13.0992	13.0966	+	EtOH_Cnrtl	Cluster -223	actin cytoskeleton organization;actin filament-based process;biological regulation;cellular component organization;cellular component organization or biogenesis;cellular process;cytoskeleton organization;modulation of chemical synaptic transmission;organelle organization;positive regulation of biological process;positive regulation of cell communication;positive regulation of cellular process;pos…	enzyme regulator activity;GTPase regulator activity;guanyl-nucleotide exchange factor activity;molecular function regulator activity;nucleoside-triphosphatase regulator activity	cell junction;cellular anatomical entity;cytoplasm;Schaffer collateral - CA1 synapse;synapse	Endocytosis	0	2.52702	-0.330623	-6.74685	Q5JU85	Q5JU85	IQEC2_HUMAN	IQSEC2	IQSEC2	IQ motif and SEC7 domain-containing protein 2	10877.4	11409.8	11693	3	9493.12	8775.19	8759.53	3	IQSEC2
Q8NBT2	Q8NBT2	SPC24_HUMAN	SPC24	SPC24	Kinetochore protein Spc24	1.18657	0.00332733	0.24701	0.513217	28850.9	30778.2	29064.1	35680.2	35639.2	33921.6	14.8163	14.9096	14.827	15.1228	15.1212	15.0499	+	EtOH_Cnrtl	Cluster -224	attachment of spindle microtubules to kinetochore;biological regulation;cell cycle checkpoint signaling;cell cycle process;cell division;cellular process;chromosome segregation;intracellular signal transduction;mitotic cell cycle checkpoint signaling;mitotic cell cycle process;mitotic spindle assembly checkpoint signaling;mitotic spindle checkpoint signaling;negative regulation of biological proc…		cellular anatomical entity;cytosol;intracellular non-membrane-bounded organelle;intracellular organelle;kinetochore;Ndc80 complex;non-membrane-bounded organelle;nucleolus;nucleoplasm;organelle;protein-containing complex;supramolecular complex		0	2.4779	0.24701	6.49315	Q8NBT2	Q8NBT2	SPC24_HUMAN	SPC24	SPC24	Kinetochore protein Spc24	28850.9	30778.2	29064.1	3	35680.2	35639.2	33921.6	3	SPC24
Q96PC5;Q96PC5-10;Q96PC5-12;Q96PC5-14;Q96PC5-7;Q96PC5-9	Q96PC5	MIA2_HUMAN	MIA2	MIA2	Melanoma inhibitory activity protein 2	1.16172	0.0035195	0.216132	0.408988	64964.3	62190.5	61883.3	75873.9	71820.6	71914.7	15.9874	15.9244	15.9173	16.2113	16.1321	16.134	+	EtOH_Cnrtl	Cluster -224	cellular localization;cellular macromolecule localization;cellular process;endoplasmic reticulum to Golgi vesicle-mediated transport;establishment of localization;establishment of localization in cell;establishment of protein localization;establishment of protein localization to extracellular region;export from cell;Golgi vesicle transport;intracellular protein transport;intracellular transport;l…	cargo receptor activity;enzyme activator activity;enzyme regulator activity;molecular function activator activity;molecular function regulator activity	cellular anatomical entity;endoplasmic reticulum;endoplasmic reticulum exit site;endoplasmic reticulum membrane;intracellular membrane-bounded organelle;intracellular organelle;membrane;membrane-bounded organelle;organelle;organelle membrane		0	2.45352	0.216132	6.30036	Q96PC5;Q96PC5-10;Q96PC5-12;Q96PC5-14;Q96PC5-7;Q96PC5-9	Q96PC5	MIA2_HUMAN	MIA2	MIA2	Melanoma inhibitory activity protein 2	64964.3	62190.5	61883.3	3	75873.9	71820.6	71914.7	3	MIA2
P43155;P43155-2	P43155	CACP_HUMAN	CRAT	CRAT	Carnitine O-acetyltransferase	1.14442	0.00372767	0.194753	0.336821	47869.3	45250.9	47051.7	52910.6	52592.1	54913.1	15.5468	15.4657	15.522	15.6913	15.6826	15.7449	+	EtOH_Cnrtl	Cluster -224	amino-acid betaine metabolic process;carboxylic acid catabolic process;carboxylic acid metabolic process;carnitine metabolic process;carnitine metabolic process, CoA-linked;catabolic process;cellular catabolic process;cellular lipid catabolic process;cellular lipid metabolic process;cellular metabolic process;cellular modified amino acid metabolic process;cellular nitrogen compound metabolic proc…	acetyltransferase activity;acyl-CoA oxidase activity;acyltransferase activity;acyltransferase activity, transferring groups other than amino-acyl groups;carnitine O-acetyltransferase activity;carnitine O-acyltransferase activity;carnitine O-octanoyltransferase activity;catalytic activity;O-acetyltransferase activity;O-acyltransferase activity;O-octanoyltransferase activity;octanoyltransferase act…	cellular anatomical entity;cytosol;endoplasmic reticulum;intracellular membrane-bounded organelle;intracellular organelle;intracellular organelle lumen;membrane;membrane-bounded organelle;membrane-enclosed lumen;microbody;microbody lumen;mitochondrial inner membrane;mitochondrial membrane;mitochondrion;organelle;organelle inner membrane;organelle lumen;organelle membrane;peroxisomal matrix;peroxi…		0	2.42856	0.194753	6.2996	P43155;P43155-2	P43155	CACP_HUMAN	CRAT	CRAT	Carnitine O-acetyltransferase	47869.3	45250.9	47051.7	3	52910.6	52592.1	54913.1	3	CRAT
Q86XZ4	Q86XZ4	SPAS2_HUMAN	SPATS2	SPATS2	Spermatogenesis-associated serine-rich protein 2	0.846685	0.00471649	-0.240428	1.13215	8804.45	8421.55	8376.87	6928.77	7287.19	7461.6	13.104	13.0399	13.0322	12.7584	12.8311	12.8653	+	EtOH_Cnrtl	Cluster -223		binding;nucleic acid binding;organic cyclic compound binding;RNA binding	cellular anatomical entity;cytoplasm;cytosol		0	2.32638	-0.240428	-6.18319	Q86XZ4	Q86XZ4	SPAS2_HUMAN	SPATS2	SPATS2	Spermatogenesis-associated serine-rich protein 2	8804.45	8421.55	8376.87	3	6928.77	7287.19	7461.6	3	SPATS2
P20338	P20338	RAB4A_HUMAN	RAB4A	RAB4A	Ras-related protein Rab-4A	0.740449	0.00489032	-0.434184	1.78618	45760.9	49600.6	51331.3	39137.2	34584.4	34896.9	15.4818	15.5981	15.6476	15.2563	15.0778	15.0908	+	EtOH_Cnrtl	Cluster -223	antigen processing and presentation;biological regulation;cellular localization;cellular macromolecule localization;cellular process;establishment of localization;establishment of protein localization;immune system process;intracellular signal transduction;localization;macromolecule localization;nitrogen compound transport;organic substance transport;protein localization;protein transport;Rab pro…	anion binding;binding;carbohydrate derivative binding;catalytic activity;G protein activity;GDP binding;GTP binding;GTPase activity;guanyl nucleotide binding;guanyl ribonucleotide binding;heterocyclic compound binding;hydrolase activity;hydrolase activity, acting on acid anhydrides;hydrolase activity, acting on acid anhydrides, in phosphorus-containing anhydrides;ion binding;molecular function re…	bounding membrane of organelle;cellular anatomical entity;cytoplasmic vesicle;cytoplasmic vesicle membrane;early endosome membrane;endosome;endosome membrane;extracellular exosome;extracellular membrane-bounded organelle;extracellular organelle;extracellular vesicle;insulin-responsive compartment;intracellular membrane-bounded organelle;intracellular organelle;intracellular vesicle;membrane;membr…	Endocytosis	0	2.31066	-0.434184	-5.74536	P20338	P20338	RAB4A_HUMAN	RAB4A	RAB4A	Ras-related protein Rab-4A	45760.9	49600.6	51331.3	3	39137.2	34584.4	34896.9	3	RAB4A
Q6I9Y2	Q6I9Y2	THOC7_HUMAN	THOC7	THOC7	THO complex subunit 7 homolog	0.72601	0.00508899	-0.460571	1.87525	44945.3	48653.4	43472.6	32623.3	34040.6	32851.2	15.4559	15.5703	15.4078	14.9936	15.055	15.0037	+	EtOH_Cnrtl	Cluster -223	biological process involved in interaction with host;biological process involved in interspecies interaction between organisms;biological process involved in symbiotic interaction;cellular aromatic compound metabolic process;cellular localization;cellular metabolic process;cellular nitrogen compound metabolic process;cellular process;establishment of localization;establishment of localization in …	binding;nucleic acid binding;organic cyclic compound binding;RNA binding	cellular anatomical entity;cytoplasm;cytosol;intracellular membrane-bounded organelle;intracellular organelle;membrane-bounded organelle;nuclear body;nuclear protein-containing complex;nuclear speck;nucleoplasm;nucleus;organelle;protein-containing complex;THO complex;THO complex part of transcription export complex;transcription export complex	RNA transport	0	2.29337	-0.460571	-8.8936	Q6I9Y2	Q6I9Y2	THOC7_HUMAN	THOC7	THOC7	THO complex subunit 7 homolog	44945.3	48653.4	43472.6	3	32623.3	34040.6	32851.2	3	THOC7
Q5BKX5	Q5BKX5	ACTMP_HUMAN	ACTMAP	ACTMAP	Actin maturation protease	0.795746	0.00517087	-0.329573	1.43306	9154.25	9813.64	8887.06	7083.1	7803.57	7278.81	13.1602	13.2606	13.1175	12.7902	12.9299	12.8295	+	EtOH_Cnrtl	Cluster -223	macromolecule metabolic process;metabolic process;nitrogen compound metabolic process;organic substance metabolic process;organonitrogen compound metabolic process;primary metabolic process;protein maturation;protein metabolic process;protein processing;proteolysis	aminopeptidase activity;catalytic activity;catalytic activity, acting on a protein;cysteine-type aminopeptidase activity;cysteine-type exopeptidase activity;cysteine-type peptidase activity;exopeptidase activity;hydrolase activity;initiator methionyl aminopeptidase activity;peptidase activity	cellular anatomical entity;cytoplasm		0	2.28644	-0.329573	-5.54744	Q5BKX5	Q5BKX5	ACTMP_HUMAN	ACTMAP	ACTMAP	Actin maturation protease	9154.25	9813.64	8887.06	3	7083.1	7803.57	7278.81	3	ACTMAP
Q9BZX2	Q9BZX2	UCK2_HUMAN	UCK2	UCK2	Uridine-cytidine kinase 2	0.683044	0.00517691	-0.552246	2.18471	53129.1	52339.9	57342.8	35119.1	35336.8	40751.7	15.6972	15.6756	15.8073	15.1	15.1089	15.3146	+	EtOH_Cnrtl	Cluster -223	aromatic compound biosynthetic process;biosynthetic process;carbohydrate derivative biosynthetic process;carbohydrate derivative metabolic process;cellular aromatic compound metabolic process;cellular biosynthetic process;cellular metabolic compound salvage;cellular metabolic process;cellular nitrogen compound biosynthetic process;cellular nitrogen compound metabolic process;cellular process;CTP …	adenyl nucleotide binding;adenyl ribonucleotide binding;anion binding;ATP binding;binding;carbohydrate derivative binding;catalytic activity;cytidine kinase activity;heterocyclic compound binding;identical protein binding;ion binding;kinase activity;nucleobase-containing compound kinase activity;nucleoside kinase activity;nucleoside phosphate binding;nucleotide binding;organic cyclic compound bin…	cellular anatomical entity;cytoplasm;cytosol	Drug metabolism - other enzymes;Pyrimidine metabolism	0	2.28593	-0.552246	-6.8098	Q9BZX2	Q9BZX2	UCK2_HUMAN	UCK2	UCK2	Uridine-cytidine kinase 2	53129.1	52339.9	57342.8	3	35119.1	35336.8	40751.7	3	UCK2
Q9H3U5;Q9H3U5-3;Q9H3U5-5;Q9H3U5-6	Q9H3U5	MFSD1_HUMAN	MFSD1	MFSD1	Lysosomal dipeptide transporter MFSD1	1.27218	0.00538464	0.347791	0.85341	16772.2	16991	17823.4	21810.7	21856.7	21960	14.0338	14.0525	14.1215	14.4127	14.4158	14.4226	+	EtOH_Cnrtl	Cluster -224	biological regulation;cellular localization;cellular macromolecule localization;cellular process;localization;macromolecule localization;protein localization;protein localization to lysosome;protein localization to organelle;protein localization to vacuole;protein stabilization;regulation of biological quality;regulation of protein stability	binding;identical protein binding;protein binding;protein dimerization activity;protein homodimerization activity;transmembrane transporter activity;transporter activity	bounding membrane of organelle;cellular anatomical entity;intracellular membrane-bounded organelle;intracellular organelle;lysosomal membrane;lysosome;lytic vacuole;lytic vacuole membrane;membrane;membrane-bounded organelle;organelle;organelle membrane;vacuolar membrane;vacuole		0	2.26884	0.347791	12.9641	Q9H3U5;Q9H3U5-3;Q9H3U5-5;Q9H3U5-6	Q9H3U5	MFSD1_HUMAN	MFSD1	MFSD1	Lysosomal dipeptide transporter MFSD1	16772.2	16991	17823.4	3	21810.7	21856.7	21960	3	MFSD1
O15234	O15234	CASC3_HUMAN	CASC3	CASC3	Protein CASC3	0.848193	0.00551991	-0.237506	1.12229	11815.8	12627.2	11857.8	10254	9891.88	10644.2	13.5284	13.6242	13.5335	13.3239	13.272	13.3778	+	EtOH_Cnrtl	Cluster -223	aromatic compound catabolic process;biological regulation;catabolic process;cellular aromatic compound metabolic process;cellular catabolic process;cellular localization;cellular macromolecule localization;cellular metabolic process;cellular nitrogen compound catabolic process;cellular nitrogen compound metabolic process;cellular process;establishment of localization;establishment of localization…	binding;enzyme binding;identical protein binding;mRNA binding;nucleic acid binding;organic cyclic compound binding;protein binding;RNA binding;ubiquitin protein ligase binding;ubiquitin-like protein ligase binding	catalytic complex;catalytic step 1 spliceosome;cell projection;cellular anatomical entity;cytoplasmic ribonucleoprotein granule;cytoplasmic stress granule;cytosol;dendrite;exon-exon junction complex;intracellular membrane-bounded organelle;intracellular non-membrane-bounded organelle;intracellular organelle;membrane;membrane-bounded organelle;neuron projection;non-membrane-bounded organelle;nucle…	mRNA surveillance pathway;RNA transport	0	2.25807	-0.237506	-5.44792	O15234	O15234	CASC3_HUMAN	CASC3	CASC3	Protein CASC3	11815.8	12627.2	11857.8	3	10254	9891.88	10644.2	3	CASC3
O95292	O95292	VAPB_HUMAN	VAPB	VAPB	Vesicle-associated membrane protein-associated protein B/C	1.1731	0.005884	0.230737	0.458288	107189	105009	99677.4	123196	123922	118742	16.7098	16.6802	16.605	16.9106	16.9191	16.8575	+	EtOH_Cnrtl	Cluster -224	biological process involved in interaction with host;biological process involved in interaction with symbiont;biological process involved in interspecies interaction between organisms;biological process involved in symbiotic interaction;biological regulation;calcium ion homeostasis;cellular component organization;cellular component organization or biogenesis;cellular homeostasis;cellular localiza…	beta-tubulin binding;binding;cadherin binding;cell adhesion molecule binding;cytoskeletal protein binding;enzyme binding;FFAT motif binding;identical protein binding;microtubule binding;protein binding;protein dimerization activity;protein domain specific binding;protein heterodimerization activity;protein homodimerization activity;tubulin binding	cellular anatomical entity;cytoplasm;endoplasmic reticulum;endoplasmic reticulum membrane;Golgi apparatus;intracellular membrane-bounded organelle;intracellular organelle;membrane;membrane-bounded organelle;organelle;organelle membrane;plasma membrane		0	2.23033	0.230737	6.2921	O95292	O95292	VAPB_HUMAN	VAPB	VAPB	Vesicle-associated membrane protein-associated protein B/C	107189	105009	99677.4	3	123196	123922	118742	3	VAPB
Q9BWD1	Q9BWD1	THIC_HUMAN	ACAT2	ACAT2	Acetyl-CoA acetyltransferase, cytosolic	0.781547	0.00621089	-0.354775	1.51813	558842	541888	497127	432368	419993	396439	19.0921	19.0476	18.9233	18.7219	18.68	18.5967	+	EtOH_Cnrtl	Cluster -223	carboxylic acid catabolic process;carboxylic acid metabolic process;catabolic process;cellular catabolic process;cellular lipid catabolic process;cellular lipid metabolic process;cellular metabolic process;cellular process;fatty acid beta-oxidation;fatty acid catabolic process;fatty acid metabolic process;fatty acid oxidation;lipid catabolic process;lipid metabolic process;lipid modification;lipi…	acetyl-CoA C-acetyltransferase activity;acetyl-CoA C-acyltransferase activity;acetyltransferase activity;acyltransferase activity;acyltransferase activity, transferring groups other than amino-acyl groups;C-acetyltransferase activity;C-acyltransferase activity;catalytic activity;transferase activity	cellular anatomical entity;cytoplasm;cytosol;extracellular exosome;extracellular membrane-bounded organelle;extracellular organelle;extracellular vesicle;intracellular membrane-bounded organelle;intracellular organelle;membrane-bounded organelle;mitochondrion;organelle;vesicle	Benzoate degradation;Butanoate metabolism;Carbon fixation pathways in prokaryotes;Fatty acid metabolism;Glyoxylate and dicarboxylate metabolism;Lysine degradation;Propanoate metabolism;Pyruvate metabolism;Synthesis and degradation of ketone bodies;Terpenoid backbone biosynthesis;Tryptophan metabolism;Two-component system;Valine, leucine and isoleucine degradation	0	2.20685	-0.354775	-5.67679	Q9BWD1	Q9BWD1	THIC_HUMAN	ACAT2	ACAT2	Acetyl-CoA acetyltransferase, cytosolic	558842	541888	497127	3	432368	419993	396439	3	ACAT2
Q9BQE5	Q9BQE5	APOL2_HUMAN	APOL2	APOL2	Apolipoprotein L2	1.19141	0.00655001	0.253193	0.534089	117455	115185	125080	139373	140179	146639	16.8417	16.8136	16.9325	17.0886	17.0969	17.1619	+	EtOH_Cnrtl	Cluster -224	acute inflammatory response;acute-phase response;alcohol metabolic process;cholesterol metabolic process;defense response;establishment of localization;inflammatory response;lipid metabolic process;lipid transport;lipoprotein metabolic process;localization;macromolecule metabolic process;maternal process involved in female pregnancy;metabolic process;multicellular organismal reproductive process;…	binding;high-density lipoprotein particle binding;lipid binding;lipoprotein particle binding;protein binding;protein-containing complex binding;protein-lipid complex binding;signaling receptor binding	cellular anatomical entity;endoplasmic reticulum membrane;extracellular region;membrane;organelle membrane		0	2.18376	0.253193	5.92833	Q9BQE5	Q9BQE5	APOL2_HUMAN	APOL2	APOL2	Apolipoprotein L2	117455	115185	125080	3	139373	140179	146639	3	APOL2
Q8N0X4	Q8N0X4	CLYBL_HUMAN	CLYBL	CLYBL	Citramalyl-CoA lyase, mitochondrial	1.23728	0.00656358	0.307952	0.718932	12447.1	11309.1	12275.5	14671.1	14503	15407.2	13.6035	13.4652	13.5835	13.8407	13.8241	13.9113	+	EtOH_Cnrtl	Cluster -224	biological regulation;cellular component assembly;cellular component organization;cellular component organization or biogenesis;cellular process;positive regulation of biological process;positive regulation of cellular metabolic process;positive regulation of cellular process;positive regulation of cobalamin metabolic process;positive regulation of metabolic process;positive regulation of nitroge…	(S)-citramalyl-CoA lyase activity;acyltransferase activity;acyltransferase activity, acyl groups converted into alkyl on transfer;binding;carbon-carbon lyase activity;catalytic activity;cation binding;hydrolase activity;ion binding;lyase activity;magnesium ion binding;malate synthase activity;metal ion binding;oxo-acid-lyase activity;transferase activity	cellular anatomical entity;intracellular membrane-bounded organelle;intracellular organelle;membrane-bounded organelle;mitochondrion;organelle		0	2.18286	0.307952	6.06494	Q8N0X4	Q8N0X4	CLYBL_HUMAN	CLYBL	CLYBL	Citramalyl-CoA lyase, mitochondrial	12447.1	11309.1	12275.5	3	14671.1	14503	15407.2	3	CLYBL
Q5T447	Q5T447	HECD3_HUMAN	HECTD3	HECTD3	E3 ubiquitin-protein ligase HECTD3	0.877939	0.00680809	-0.188106	0.955534	60983.2	61567.4	59169.2	51587.3	52940.4	55011.1	15.8961	15.9099	15.8526	15.6547	15.6921	15.7474	+	EtOH_Cnrtl	Cluster -223	catabolic process;macromolecule catabolic process;macromolecule metabolic process;macromolecule modification;metabolic process;modification-dependent macromolecule catabolic process;modification-dependent protein catabolic process;nitrogen compound metabolic process;organic substance catabolic process;organic substance metabolic process;organonitrogen compound catabolic process;organonitrogen com…	acyltransferase activity;aminoacyltransferase activity;binding;catalytic activity;catalytic activity, acting on a protein;protein binding;SNARE binding;syntaxin binding;transferase activity;ubiquitin-like protein transferase activity;ubiquitin-protein transferase activity	cellular anatomical entity;perinuclear region of cytoplasm		0	2.16697	-0.188106	-5.87915	Q5T447	Q5T447	HECD3_HUMAN	HECTD3	HECTD3	E3 ubiquitin-protein ligase HECTD3	60983.2	61567.4	59169.2	3	51587.3	52940.4	55011.1	3	HECTD3
Q9HBF4;Q9HBF4-3	Q9HBF4	ZFYV1_HUMAN	ZFYVE1	ZFYVE1	Zinc finger FYVE domain-containing protein 1	0.854174	0.00691281	-0.226941	1.08663	37882.8	37934.2	35648	32163	31116	31931.5	15.2093	15.2112	15.1215	14.9731	14.9254	14.9627	+	EtOH_Cnrtl	Cluster -223	autophagy;biological process involved in interaction with symbiont;biological process involved in interspecies interaction between organisms;biological process involved in symbiotic interaction;catabolic process;cell communication;cellular catabolic process;cellular component assembly;cellular component organization;cellular component organization or biogenesis;cellular metabolic process;cellular…	1-phosphatidylinositol binding;anion binding;binding;cation binding;ion binding;lipid binding;metal ion binding;phosphatidylinositol binding;phosphatidylinositol phosphate binding;phosphatidylinositol-3-phosphate binding;phosphatidylinositol-3,4-bisphosphate binding;phosphatidylinositol-3,4,5-trisphosphate binding;phospholipid binding;transition metal ion binding;zinc ion binding	autophagosome;cellular anatomical entity;endoplasmic reticulum;endoplasmic reticulum membrane;extrinsic component of membrane;extrinsic component of omegasome membrane;extrinsic component of organelle membrane;Golgi apparatus;Golgi apparatus subcompartment;Golgi stack;intracellular membrane-bounded organelle;intracellular non-membrane-bounded organelle;intracellular organelle;lipid droplet;membra…		0	2.16035	-0.226941	-6.89105	Q9HBF4;Q9HBF4-3	Q9HBF4	ZFYV1_HUMAN	ZFYVE1	ZFYVE1	Zinc finger FYVE domain-containing protein 1	37882.8	37934.2	35648	3	32163	31116	31931.5	3	ZFYVE1
Q92484;Q92484-2	Q92484	ASM3A_HUMAN	SMPDL3A	SMPDL3A	Cyclic GMP-AMP phosphodiesterase SMPDL3A	1.22807	0.00699061	0.295609	0.677265	23919.4	23134.1	24487.2	29628.3	30522	27706.6	14.5459	14.4977	14.5797	14.8547	14.8976	14.7579	+	EtOH_Cnrtl	Cluster -224	aromatic compound catabolic process;catabolic process;cellular aromatic compound metabolic process;cellular catabolic process;cellular metabolic process;cellular nitrogen compound catabolic process;cellular nitrogen compound metabolic process;cellular process;heterocycle catabolic process;heterocycle metabolic process;metabolic process;nitrogen compound metabolic process;nucleobase-containing com…	binding;catalytic activity;cation binding;hydrolase activity;hydrolase activity, acting on ester bonds;ion binding;metal ion binding;phosphoric diester hydrolase activity;phosphoric ester hydrolase activity;transition metal ion binding;zinc ion binding	cellular anatomical entity;extracellular exosome;extracellular membrane-bounded organelle;extracellular organelle;extracellular space;extracellular vesicle;membrane-bounded organelle;organelle;vesicle		0	2.15548	0.295609	6.20279	Q92484;Q92484-2	Q92484	ASM3A_HUMAN	SMPDL3A	SMPDL3A	Cyclic GMP-AMP phosphodiesterase SMPDL3A	23919.4	23134.1	24487.2	3	29628.3	30522	27706.6	3	SMPDL3A
Q9BW27;Q9BW27-3	Q9BW27	NUP85_HUMAN	NUP85	NUP85	Nuclear pore complex protein Nup85	0.91612	0.00720679	-0.126262	0.746778	30540.8	30199.8	31266.6	27885.8	28175.1	28228.7	14.8984	14.8823	14.9323	14.7672	14.7821	14.7849	+	EtOH_Cnrtl	Cluster -223	anatomical structure development;biological regulation;cell chemotaxis;cell migration;cell motility;cell projection assembly;cell projection organization;cellular component assembly;cellular component organization;cellular component organization or biogenesis;cellular localization;cellular macromolecule localization;cellular process;chemotaxis;developmental process;establishment of localization;e…	structural constituent of nuclear pore;structural molecule activity	cellular anatomical entity;cytosol;envelope;intracellular non-membrane-bounded organelle;intracellular organelle;kinetochore;membrane;non-membrane-bounded organelle;nuclear envelope;nuclear membrane;nuclear pore;nuclear pore outer ring;nuclear protein-containing complex;nucleoplasm;organelle;organelle envelope;organelle membrane;protein-containing complex;spindle;supramolecular complex	RNA transport	0	2.14226	-0.126262	-8.02213	Q9BW27;Q9BW27-3	Q9BW27	NUP85_HUMAN	NUP85	NUP85	Nuclear pore complex protein Nup85	30540.8	30199.8	31266.6	3	27885.8	28175.1	28228.7	3	NUP85
Q96E16	Q96E16	SMI19_HUMAN	SMIM19	SMIM19	Small integral membrane protein 19	2.38148	0.00730454	1.24467	3.88088	2902.57	2002.08	2347.18	7158.64	5510.67	4600.75	11.5031	10.9673	11.1967	12.8055	12.428	12.1677	+	EtOH_Cnrtl	Cluster -224			cellular anatomical entity;membrane		2	2.13641	1.24467	5.15171	Q96E16	Q96E16	SMI19_HUMAN	SMIM19	SMIM19	Small integral membrane protein 19	2902.57			1	7158.64	5510.67	4600.75	3	SMIM19
Q10713	Q10713	MPPA_HUMAN	PMPCA	PMPCA	Mitochondrial-processing peptidase subunit alpha	1.07565	0.00735346	0.105228	0.0346259	74107.5	76777.4	74892.9	81334.7	79405.9	82117.9	16.1773	16.2284	16.1925	16.3116	16.277	16.3254	+	EtOH_Cnrtl	Cluster -224	macromolecule metabolic process;metabolic process;mitochondrial protein processing;nitrogen compound metabolic process;organic substance metabolic process;organonitrogen compound metabolic process;primary metabolic process;protein maturation;protein metabolic process;protein processing;protein processing involved in protein targeting to mitochondrion;proteolysis	binding;catalytic activity;catalytic activity, acting on a protein;cation binding;endopeptidase activity;hydrolase activity;ion binding;metal ion binding;metalloendopeptidase activity;metallopeptidase activity;peptidase activity	catalytic complex;cellular anatomical entity;extracellular space;intracellular membrane-bounded organelle;intracellular organelle;membrane;membrane-bounded organelle;mitochondrial inner membrane;mitochondrial membrane;mitochondrial processing peptidase complex;mitochondrial protein-containing complex;mitochondrion;organelle;organelle inner membrane;organelle membrane;protein-containing complex		0	2.13351	0.105228	5.03518	Q10713	Q10713	MPPA_HUMAN	PMPCA	PMPCA	Mitochondrial-processing peptidase subunit alpha	74107.5	76777.4	74892.9	3	81334.6	79405.9	82117.9	3	PMPCA
Q9H0E2	Q9H0E2	TOLIP_HUMAN	TOLLIP	TOLLIP	Toll-interacting protein	1.13656	0.00740194	0.184363	0.301751	312117	320933	309379	366610	344531	359987	18.2517	18.2919	18.239	18.4839	18.3943	18.4576	+	EtOH_Cnrtl	Cluster -224	autophagy;biological process involved in interspecies interaction between organisms;biological regulation;catabolic process;cell activation;cell differentiation;cell surface receptor signaling pathway;cellular catabolic process;cellular developmental process;cellular localization;cellular macromolecule localization;cellular metabolic process;cellular process;cytokine-mediated signaling pathway;de…	binding;cytokine receptor binding;enzyme binding;growth factor receptor binding;interleukin-1 receptor binding;interleukin-1, type I receptor binding;kinase binding;molecular adaptor activity;protein binding;signaling receptor binding;SUMO binding;Toll-like receptor binding;ubiquitin binding;ubiquitin conjugating enzyme binding;ubiquitin protein ligase binding;ubiquitin-like protein binding;ubiqu…	azurophil granule lumen;cellular anatomical entity;cytoplasm;cytoplasmic vesicle;cytoplasmic vesicle lumen;cytosol;early endosome;endosome;extracellular exosome;extracellular membrane-bounded organelle;extracellular organelle;extracellular region;extracellular vesicle;extrinsic component of membrane;extrinsic component of plasma membrane;intracellular membrane-bounded organelle;intracellular orga…	Toll-like receptor signaling pathway	0	2.13065	0.184363	5.946	Q9H0E2	Q9H0E2	TOLIP_HUMAN	TOLLIP	TOLLIP	Toll-interacting protein	312117	320933	309379	3	366610	344531	359987	3	TOLLIP
Q9P021	Q9P021	CRIPT_HUMAN	CRIPT	CRIPT	Cysteine-rich PDZ-binding protein	0.83051	0.00774135	-0.267485	1.22348	45998.4	45193.8	49555.1	39379.3	37307.4	40205.4	15.4893	15.4638	15.5967	15.2652	15.1872	15.2951	+	EtOH_Cnrtl	Cluster -223	biological regulation;cellular aromatic compound metabolic process;cellular component organization;cellular component organization or biogenesis;cellular localization;cellular macromolecule localization;cellular metabolic process;cellular nitrogen compound metabolic process;cellular process;cytoplasmic microtubule organization;cytoskeleton organization;establishment of localization;establishment …	binding;cytoskeletal protein binding;microtubule binding;PDZ domain binding;protein binding;protein domain specific binding;protein-containing complex binding;scaffold protein binding;tubulin binding	cell body;cell junction;cell projection;cellular anatomical entity;cytoplasm;dendrite;dendritic shaft;dendritic spine;glutamatergic synapse;intracellular non-membrane-bounded organelle;intracellular organelle;neuron projection;neuron spine;neuronal cell body;non-membrane-bounded organelle;nuclear protein-containing complex;organelle;plasma membrane bounded cell projection;postsynapse;postsynaptic…		0	2.11118	-0.267485	-5.15392	Q9P021	Q9P021	CRIPT_HUMAN	CRIPT	CRIPT	Cysteine-rich PDZ-binding protein	45998.4	45193.8	49555.1	3	39379.3	37307.4	40205.4	3	CRIPT
O43493-6	O43493-6	TGON2_HUMAN	TGOLN2	TGOLN2	Isoform 6 of Trans-Golgi network integral membrane protein 2	3.09206	0.00784245	1.62945	5.17972	1469.77	2363.19	2426.96	7181.42	4573.98	7600.61	10.5214	11.2065	11.2449	12.8101	12.1592	12.8919	+	EtOH_Cnrtl	Cluster -224			bounding membrane of organelle;cellular anatomical entity;clathrin-coated endocytic vesicle membrane;clathrin-coated vesicle;clathrin-coated vesicle membrane;coated vesicle;coated vesicle membrane;cytoplasmic vesicle;cytoplasmic vesicle membrane;endocytic vesicle membrane;endoplasmic reticulum lumen;endosome;Golgi apparatus;Golgi apparatus subcompartment;Golgi-associated vesicle;intracellular mem…		3	2.10555	1.62945	4.93611	O43493-6	O43493-6	TGON2_HUMAN	TGOLN2	TGOLN2	Isoform 6 of Trans-Golgi network integral membrane protein 2				0	7181.42	4573.98	7600.61	3	TGOLN2
A0AVI4;A0AVI4-2	A0AVI4	TM129_HUMAN	TMEM129	TMEM129	E3 ubiquitin-protein ligase TM129	0.582604	0.0086132	-0.785677	2.97266	3179.95	3317.05	3562.01	1702.01	1960.17	2198.24	11.6348	11.6957	11.7985	10.733	10.9368	11.1021	+	EtOH_Cnrtl	Cluster -223	catabolic process;cellular localization;cellular macromolecule localization;cellular process;cellular response to stimulus;cellular response to stress;endoplasmic reticulum to cytosol transport;ERAD pathway;establishment of localization;establishment of localization in cell;establishment of protein localization;intracellular protein transport;intracellular transport;localization;macromolecule cat…	acyltransferase activity;aminoacyltransferase activity;binding;catalytic activity;catalytic activity, acting on a protein;cation binding;ion binding;metal ion binding;transferase activity;ubiquitin protein ligase activity;ubiquitin-like protein ligase activity;ubiquitin-like protein transferase activity;ubiquitin-protein transferase activity	cellular anatomical entity;endoplasmic reticulum;endoplasmic reticulum membrane;intracellular membrane-bounded organelle;intracellular organelle;membrane;membrane-bounded organelle;organelle;organelle membrane		0	2.06484	-0.785677	-6.7184	A0AVI4;A0AVI4-2	A0AVI4	TM129_HUMAN	TMEM129	TMEM129	E3 ubiquitin-protein ligase TM129	3179.95	3317.05	3562.01	3	1702.01	1960.17	2198.24	3	TMEM129
Q8N511	Q8N511	TM199_HUMAN	TMEM199	TMEM199	Transmembrane protein 199	1.28528	0.00876315	0.361233	0.898784	32774.5	30801.8	29424.2	39636.4	42676.5	37218.6	15.0003	14.9107	14.8447	15.2745	15.3812	15.1837	+	EtOH_Cnrtl	Cluster -224	biological regulation;catabolic process;cellular component assembly;cellular component organization;cellular component organization or biogenesis;cellular homeostasis;cellular process;cellular response to chemical stimulus;cellular response to increased oxygen levels;cellular response to oxygen levels;cellular response to stimulus;chemical homeostasis;homeostatic process;inorganic ion homeostasis…		ATPase complex;bounding membrane of organelle;catalytic complex;cellular anatomical entity;coated vesicle membrane;COPI-coated vesicle membrane;cytoplasmic vesicle membrane;endomembrane system;endoplasmic reticulum;endoplasmic reticulum membrane;endoplasmic reticulum-Golgi intermediate compartment membrane;Golgi-associated vesicle membrane;intracellular membrane-bounded organelle;intracellular or…		0	2.05734	0.361233	4.968	Q8N511	Q8N511	TM199_HUMAN	TMEM199	TMEM199	Transmembrane protein 199	32774.5	30801.8	29424.2	3	39636.4	42676.5	37218.6	3	TMEM199
Q96LW7-2	Q96LW7-2	CAR19_HUMAN	CARD19	CARD19	Isoform 2 of Caspase recruitment domain-containing protein 19	1.41848	0.00961983	0.506992	1.3908	35776.5	36897.4	30781.4	51735.8	49205.5	45807.5	15.1267	15.1712	14.9098	15.6589	15.5865	15.4833	+	EtOH_Cnrtl	Cluster -224	biological regulation;negative regulation of biological process;negative regulation of canonical NF-kappaB signal transduction;negative regulation of cell communication;negative regulation of cellular process;negative regulation of intracellular signal transduction;negative regulation of response to stimulus;negative regulation of signal transduction;negative regulation of signaling;regulation of…	binding;CARD domain binding;protein binding;protein domain specific binding	cellular anatomical entity;cytosol;endoplasmic reticulum membrane;intracellular membrane-bounded organelle;intracellular organelle;membrane;membrane-bounded organelle;mitochondrial membrane;mitochondrion;nucleus;organelle;organelle membrane		0	2.01683	0.506992	5.30937	Q96LW7-2	Q96LW7-2	CAR19_HUMAN	CARD19	CARD19	Isoform 2 of Caspase recruitment domain-containing protein 19	35776.5	36897.4	30781.4	3	51735.8	49205.5	45807.5	3	CARD19
Q68D10;Q68D10-2	Q68D10	SPT2_HUMAN	SPTY2D1	SPTY2D1	Protein SPT2 homolog	1.23718	0.00976461	0.307943	0.718901	15727.3	14453.9	13995.7	18154.3	17476.8	19023.6	13.941	13.8192	13.7727	14.148	14.0932	14.2155	+	EtOH_Cnrtl	Cluster -224	aromatic compound biosynthetic process;biological regulation;biosynthetic process;cellular aromatic compound metabolic process;cellular biosynthetic process;cellular component assembly;cellular component organization;cellular component organization or biogenesis;cellular metabolic process;cellular nitrogen compound biosynthetic process;cellular nitrogen compound metabolic process;cellular process…	binding;DNA binding;enzyme binding;histone binding;histone chaperone activity;molecular carrier activity;nucleic acid binding;organic cyclic compound binding;protein binding;protein carrier chaperone;RNA polymerase binding;RNA polymerase core enzyme binding;RNA polymerase I core binding	cellular anatomical entity;intracellular non-membrane-bounded organelle;intracellular organelle;non-membrane-bounded organelle;nucleolus;nucleoplasm;organelle		0	2.01035	0.307943	5.01562	Q68D10;Q68D10-2	Q68D10	SPT2_HUMAN	SPTY2D1	SPTY2D1	Protein SPT2 homolog	15727.3	14453.9	13995.7	3	18154.3	17476.8	19023.6	3	SPTY2D1
P30679	P30679	GNA15_HUMAN	GNA15	GNA15	Guanine nucleotide-binding protein subunit alpha-15	0.877183	0.0102936	-0.189244	0.959378	60507.6	59730.8	63391	55240.4	51450.2	54386	15.8848	15.8662	15.952	15.7534	15.6509	15.7309	+	EtOH_Cnrtl	Cluster -223	acetylcholine receptor signaling pathway;action potential;activation of phospholipase C activity;adenylate cyclase-modulating G protein-coupled receptor signaling pathway;biological regulation;cellular process;dopamine receptor signaling pathway;G protein-coupled acetylcholine receptor signaling pathway;G protein-coupled receptor signaling pathway;phospholipase C-activating dopamine receptor sign…	anion binding;binding;carbohydrate derivative binding;catalytic activity;cation binding;G protein-coupled receptor binding;G-protein beta/gamma-subunit complex binding;GTP binding;GTPase activity;guanyl nucleotide binding;guanyl ribonucleotide binding;heterocyclic compound binding;hydrolase activity;hydrolase activity, acting on acid anhydrides;hydrolase activity, acting on acid anhydrides, in ph…	catalytic complex;cell junction;cellular anatomical entity;GTPase complex;heterotrimeric G-protein complex;membrane;membrane protein complex;plasma membrane;plasma membrane protein complex;protein-containing complex;synapse	Amoebiasis;Calcium signaling pathway;Chagas disease (American trypanosomiasis)	0	1.98743	-0.189244	-4.6627	P30679	P30679	GNA15_HUMAN	GNA15	GNA15	Guanine nucleotide-binding protein subunit alpha-15	60507.6	59730.8	63391	3	55240.4	51450.2	54386	3	GNA15
Q16537;Q16537-2	Q16537	2A5E_HUMAN	PPP2R5E	PPP2R5E	Serine/threonine-protein phosphatase 2A 56 kDa regulatory subunit epsilon isoform	0.872977	0.0106551	-0.196352	0.983372	66339.4	65643	65424	55935.2	59201.4	57194.7	16.0176	16.0024	15.9975	15.7715	15.8533	15.8036	+	EtOH_Cnrtl	Cluster -223	biological regulation;cellular process;regulation of biological process;regulation of cellular process;signal transduction	enzyme activator activity;enzyme regulator activity;molecular function activator activity;molecular function regulator activity;phosphatase activator activity;phosphatase regulator activity;protein phosphatase activator activity;protein phosphatase regulator activity	catalytic complex;cellular anatomical entity;cytoplasm;cytosol;intracellular membrane-bounded organelle;intracellular organelle;membrane-bounded organelle;nucleus;organelle;phosphatase complex;protein phosphatase type 2A complex;protein serine/threonine phosphatase complex;protein-containing complex	Adrenergic signaling in cardiomyocytes;AMPK signaling pathway;Cell cycle;Dopaminergic synapse;Human papillomavirus infection;Meiosis - yeast;mRNA surveillance pathway;Oocyte meiosis;PI3K-Akt signaling pathway;Sphingolipid signaling pathway;T cell receptor signaling pathway;Wnt signaling pathway	0	1.97244	-0.196352	-7.99113	Q16537;Q16537-2	Q16537	2A5E_HUMAN	PPP2R5E	PPP2R5E	Serine/threonine-protein phosphatase 2A 56 kDa regulatory subunit epsilon isoform	66339.4	65643	65424	3	55935.2	59201.4	57194.7	3	PPP2R5E
O60381;O60381-3;O60381-2	O60381	HBP1_HUMAN	HBP1	HBP1	HMG box-containing protein 1	1.35372	0.0109786	0.439316	1.16236	3215.17	2834.61	2727.09	4186.4	3800.92	3894.12	11.6507	11.4689	11.4131	12.0315	11.8921	11.9271	+	EtOH_Cnrtl	Cluster -224	biological regulation;cell surface receptor signaling pathway;cellular process;regulation of biological process;regulation of biosynthetic process;regulation of cell cycle;regulation of cellular biosynthetic process;regulation of cellular metabolic process;regulation of cellular process;regulation of DNA-templated transcription;regulation of gene expression;regulation of macromolecule biosyntheti…	binding;cis-regulatory region sequence-specific DNA binding;DNA binding;DNA-binding transcription factor activity;DNA-binding transcription factor activity, RNA polymerase II-specific;double-stranded DNA binding;nucleic acid binding;organic cyclic compound binding;RNA binding;RNA polymerase II cis-regulatory region sequence-specific DNA binding;RNA polymerase II transcription regulatory region se…	cellular anatomical entity;chromatin;intracellular membrane-bounded organelle;intracellular organelle;membrane-bounded organelle;nuclear body;nuclear speck;nucleoplasm;nucleus;organelle;protein-containing complex;protein-DNA complex		1	1.95945	0.439316	5.29066	O60381;O60381-3;O60381-2	O60381	HBP1_HUMAN	HBP1	HBP1	HMG box-containing protein 1	3215.17		2727.09	2	4186.4	3800.92	3894.12	3	HBP1
Q9UEW8;Q9UEW8-2	Q9UEW8	STK39_HUMAN	STK39	STK39	STE20/SPS1-related proline-alanine-rich protein kinase	0.837057	0.0111125	-0.256671	1.18698	112212	115381	105042	90621.2	89673.5	98139.8	16.7759	16.816	16.6806	16.4676	16.4524	16.5826	+	EtOH_Cnrtl	Cluster -223	anatomical structure homeostasis;biological regulation;cell activation;cell surface receptor signaling pathway;cell volume homeostasis;cellular component organization;cellular component organization or biogenesis;cellular homeostasis;cellular hyperosmotic response;cellular hypotonic response;cellular metabolic process;cellular process;cellular response to abiotic stimulus;cellular response to che…	adenyl nucleotide binding;adenyl ribonucleotide binding;anion binding;ATP binding;binding;carbohydrate derivative binding;catalytic activity;catalytic activity, acting on a protein;heterocyclic compound binding;ion binding;kinase activity;nucleoside phosphate binding;nucleotide binding;organic cyclic compound binding;phosphotransferase activity, alcohol group as acceptor;protein kinase activity;p…	apical plasma membrane;basolateral plasma membrane;cell body;cell cortex;cellular anatomical entity;cytoplasm;cytosol;intracellular membrane-bounded organelle;intracellular organelle;membrane;membrane-bounded organelle;nucleoplasm;organelle;plasma membrane region		0	1.95419	-0.256671	-4.46712	Q9UEW8;Q9UEW8-2	Q9UEW8	STK39_HUMAN	STK39	STK39	STE20/SPS1-related proline-alanine-rich protein kinase	112212	115381	105042	3	90621.2	89673.5	98139.8	3	STK39
Q6NUQ1	Q6NUQ1	RINT1_HUMAN	RINT1	RINT1	RAD50-interacting protein 1	0.886598	0.0112968	-0.173372	0.9058	12776.7	11950.9	12098.8	10899.1	10588.8	11162.3	13.6412	13.5448	13.5626	13.4119	13.3703	13.4463	+	EtOH_Cnrtl	Cluster -223	biological regulation;cell cycle checkpoint signaling;cell cycle process;cellular localization;cellular macromolecule localization;cellular process;cellular response to stimulus;cellular response to stress;DNA damage checkpoint signaling;DNA damage response;DNA integrity checkpoint signaling;endoplasmic reticulum to Golgi vesicle-mediated transport;establishment of localization;establishment of l…		cellular anatomical entity;cytosol;Dsl1/NZR complex;endoplasmic reticulum;endoplasmic reticulum membrane;endoplasmic reticulum protein-containing complex;intracellular membrane-bounded organelle;intracellular organelle;membrane;membrane-bounded organelle;organelle;organelle membrane;protein-containing complex;vesicle tethering complex		0	1.94705	-0.173372	-4.6988	Q6NUQ1	Q6NUQ1	RINT1_HUMAN	RINT1	RINT1	RAD50-interacting protein 1	12776.7	11950.9	12098.8	3	10899.1	10588.8	11162.3	3	RINT1
Q9NP64;Q9NP64-2;Q9NP64-3	Q9NP64	ZCC17_HUMAN	ZCCHC17	ZCCHC17	Zinc finger CCHC domain-containing protein 17	1.25831	0.011314	0.331048	0.796892	7449.8	7673.15	6847.43	9827.95	9208.08	8609.54	12.863	12.9056	12.7413	13.2627	13.1687	13.0717	+	EtOH_Cnrtl	Cluster -224	biological regulation;negative regulation of biological process;negative regulation of catabolic process;negative regulation of cellular catabolic process;negative regulation of cellular metabolic process;negative regulation of cellular process;negative regulation of macromolecule metabolic process;negative regulation of metabolic process;negative regulation of nitrogen compound metabolic process…	binding;cation binding;identical protein binding;ion binding;metal ion binding;nucleic acid binding;organic cyclic compound binding;protein binding;RNA binding;transition metal ion binding;zinc ion binding	cellular anatomical entity;cytosolic large ribosomal subunit;intracellular non-membrane-bounded organelle;intracellular organelle;large ribosomal subunit;non-membrane-bounded organelle;nucleolus;organelle;protein-containing complex;ribonucleoprotein complex;ribosomal subunit		0	1.94638	0.331048	4.47989	Q9NP64;Q9NP64-2;Q9NP64-3	Q9NP64	ZCC17_HUMAN	ZCCHC17	ZCCHC17	Zinc finger CCHC domain-containing protein 17	7449.8	7673.15	6847.43	3	9827.95	9208.08	8609.54	3	ZCCHC17
Q13242	Q13242	SRSF9_HUMAN	SRSF9	SRSF9	Serine/arginine-rich splicing factor 9	1.24507	0.0113668	0.315023	0.742801	277652	271768	265394	352799	344229	317475	18.0829	18.052	18.0178	18.4285	18.393	18.2763	+	EtOH_Cnrtl	Cluster -224	alternative mRNA splicing, via spliceosome;biological regulation;cellular aromatic compound metabolic process;cellular component assembly;cellular component organization;cellular component organization or biogenesis;cellular metabolic process;cellular nitrogen compound metabolic process;cellular process;heterocycle metabolic process;macromolecule metabolic process;metabolic process;mRNA metabolic…	binding;nucleic acid binding;organic cyclic compound binding;protein binding;protein domain specific binding;RNA binding	cellular anatomical entity;intracellular non-membrane-bounded organelle;intracellular organelle;non-membrane-bounded organelle;nuclear body;nuclear speck;nucleolus;nucleoplasm;organelle	Spliceosome	0	1.94436	0.315023	6.34142	Q13242	Q13242	SRSF9_HUMAN	SRSF9	SRSF9	Serine/arginine-rich splicing factor 9	277652	271768	265394	3	352799	344229	317475	3	SRSF9
Q9UHR6	Q9UHR6	ZNHI2_HUMAN	ZNHIT2	ZNHIT2	Zinc finger HIT domain-containing protein 2	0.6766	0.0114684	-0.567049	2.23468	17223.7	16727.4	17544.3	12762.6	11305.1	10774.1	14.0721	14.0299	14.0987	13.6396	13.4647	13.3953	+	EtOH_Cnrtl	Cluster -223		binding;cation binding;ion binding;metal ion binding			0	1.9405	-0.567049	-7.51983	Q9UHR6	Q9UHR6	ZNHI2_HUMAN	ZNHIT2	ZNHIT2	Zinc finger HIT domain-containing protein 2	17223.7	16727.4	17544.3	3	12762.6	11305.1	10774.1	3	ZNHIT2
O75152	O75152	ZC11A_HUMAN	ZC3H11A	ZC3H11A	Zinc finger CCCH domain-containing protein 11A	1.3229	0.0115666	0.404133	1.04359	28683.9	28532.3	24878.7	34368	34904.1	39331.5	14.808	14.8003	14.6026	15.0688	15.0911	15.2634	+	EtOH_Cnrtl	Cluster -224	cellular localization;cellular process;establishment of localization;establishment of localization in cell;establishment of RNA localization;intracellular transport;localization;mRNA export from nucleus;mRNA transport;nitrogen compound transport;nuclear export;nuclear transport;nucleic acid transport;nucleobase-containing compound transport;nucleocytoplasmic transport;organic substance transport;…	binding;cation binding;ion binding;metal ion binding;nucleic acid binding;organic cyclic compound binding;RNA binding	cellular anatomical entity;nucleoplasm		0	1.93679	0.404133	4.43657	O75152	O75152	ZC11A_HUMAN	ZC3H11A	ZC3H11A	Zinc finger CCCH domain-containing protein 11A	28683.9	28532.3	24878.7	3	34368	34904.1	39331.5	3	ZC3H11A
Q6PI78	Q6PI78	TMM65_HUMAN	TMEM65	TMEM65	Transmembrane protein 65	1.38701	0.0117121	0.469147	1.26305	21601.2	21257.7	19423.2	32009	27461.6	26915.3	14.3988	14.3757	14.2455	14.9662	14.7451	14.7161	+	EtOH_Cnrtl	Cluster -224	anatomical structure development;biological regulation;cardiac chamber development;cardiac ventricle development;developmental process;regulation of biological process;regulation of blood circulation;regulation of cardiac conduction;regulation of heart contraction;regulation of multicellular organismal process;regulation of system process		anchoring junction;cell junction;cell-cell contact zone;cell-cell junction;cellular anatomical entity;intercalated disc;intracellular membrane-bounded organelle;intracellular organelle;membrane;membrane-bounded organelle;mitochondrial inner membrane;mitochondrial membrane;mitochondrion;organelle;organelle inner membrane;organelle membrane;plasma membrane		0	1.93136	0.469147	5.08474	Q6PI78	Q6PI78	TMM65_HUMAN	TMEM65	TMEM65	Transmembrane protein 65	21601.2	21257.7	19423.2	3	32009	27461.6	26915.3	3	TMEM65
Q9BVT8	Q9BVT8	TMUB1_HUMAN	TMUB1	TMUB1	Transmembrane and ubiquitin-like domain-containing protein 1	1.28103	0.0117563	0.355737	0.880231	20946.7	22929	21875	26363.5	27502.4	30362.5	14.3544	14.4849	14.417	14.6863	14.7473	14.89	+	EtOH_Cnrtl	Cluster -224	catabolic process;cellular process;cellular response to stimulus;cellular response to stress;ERAD pathway;macromolecule catabolic process;macromolecule metabolic process;metabolic process;modification-dependent macromolecule catabolic process;modification-dependent protein catabolic process;nitrogen compound metabolic process;organic substance catabolic process;organic substance metabolic process…		cellular anatomical entity;cytoplasmic vesicle;endosome;intracellular membrane-bounded organelle;intracellular non-membrane-bounded organelle;intracellular organelle;intracellular vesicle;membrane;membrane-bounded organelle;microtubule organizing center;non-membrane-bounded organelle;nucleolus;organelle;plasma membrane region;postsynaptic membrane;recycling endosome;synaptic membrane;vesicle		0	1.92973	0.355737	4.99905	Q9BVT8	Q9BVT8	TMUB1_HUMAN	TMUB1	TMUB1	Transmembrane and ubiquitin-like domain-containing protein 1	20946.7	22929	21875	3	26363.5	27502.4	30362.5	3	TMUB1
P19474	P19474	RO52_HUMAN	TRIM21	TRIM21	E3 ubiquitin-protein ligase TRIM21	0.935151	0.0117631	-0.0966377	0.64678	193036	189690	197436	181084	178100	183355	17.5585	17.5333	17.591	17.4663	17.4423	17.4843	+	EtOH_Cnrtl	Cluster -223	biological process involved in interspecies interaction between organisms;biological regulation;catabolic process;cell cycle;cell death;cellular process;cellular response to chemical stimulus;cellular response to chemical stress;cellular response to stimulus;cellular response to stress;defense response;defense response to other organism;defense response to symbiont;defense response to virus;immun…	acyltransferase activity;aminoacyltransferase activity;binding;catalytic activity;catalytic activity, acting on a protein;cation binding;DNA binding;enzyme binding;identical protein binding;ion binding;kinase binding;metal ion binding;nucleic acid binding;organic cyclic compound binding;protein binding;protein dimerization activity;protein homodimerization activity;protein kinase binding;RNA bind…	autophagosome;cellular anatomical entity;cytoplasm;cytoplasmic ribonucleoprotein granule;cytoplasmic vesicle;cytosol;intracellular membrane-bounded organelle;intracellular non-membrane-bounded organelle;intracellular organelle;intracellular vesicle;membrane-bounded organelle;non-membrane-bounded organelle;nucleoplasm;nucleus;organelle;P-body;protein-containing complex;ribonucleoprotein complex;ri…	Systemic lupus erythematosus	0	1.92948	-0.0966377	-4.67666	P19474	P19474	RO52_HUMAN	TRIM21	TRIM21	E3 ubiquitin-protein ligase TRIM21	193036	189690	197436	3	181084	178100	183355	3	TRIM21
D9J307	D9J307	D9J307_HUMAN	HLA-B	HLA-B	HLA class I histocompatibility antigen B alpha chain	1.74278	0.011801	0.807974	2.40678	3456.41	3724.59	2703.55	5028.02	5864.4	6334.18	11.7551	11.8629	11.4006	12.2958	12.5178	12.6289	+	EtOH_Cnrtl	Cluster -224	antigen processing and presentation;immune response;immune system process;response to stimulus		bounding membrane of organelle;cell surface;cellular anatomical entity;coated vesicle membrane;cytoplasmic vesicle membrane;early endosome membrane;endocytic vesicle membrane;endosome membrane;ER to Golgi transport vesicle membrane;lumenal side of endoplasmic reticulum membrane;lumenal side of membrane;membrane;organelle membrane;phagocytic vesicle membrane;plasma membrane;recycling endosome memb…		0	1.92808	0.807974	4.73764	D9J307	D9J307	D9J307_HUMAN	HLA-B	HLA-B	HLA class I histocompatibility antigen B alpha chain	3456.41	3724.59	2703.55	3	5028.02	5864.4	6334.18	3	HLA-B
Q13795;Q13795-2;Q13795-3;Q13795-4	Q13795	ARFRP_HUMAN	ARFRP1	ARFRP1	ADP-ribosylation factor-related protein 1	0.859628	0.0118706	-0.218734	1.05892	3660.31	3710.27	3887.29	3114.52	3393.95	3169.11	11.8378	11.8573	11.9245	11.6048	11.7287	11.6299	+	EtOH_Cnrtl	Cluster -223	anatomical structure morphogenesis;biological regulation;cellular localization;cellular macromolecule localization;cellular process;cytosolic transport;developmental process;embryonic morphogenesis;endosomal transport;establishment of localization;establishment of localization in cell;establishment of protein localization;establishment of protein localization to membrane;establishment of protein …	anion binding;binding;carbohydrate derivative binding;catalytic activity;GTP binding;GTPase activity;guanyl nucleotide binding;guanyl ribonucleotide binding;heterocyclic compound binding;hydrolase activity;hydrolase activity, acting on acid anhydrides;hydrolase activity, acting on acid anhydrides, in phosphorus-containing anhydrides;ion binding;nucleoside phosphate binding;nucleotide binding;orga…	cellular anatomical entity;cytosol;Golgi apparatus;Golgi apparatus subcompartment;intracellular membrane-bounded organelle;intracellular organelle;membrane;membrane-bounded organelle;organelle;organelle membrane;organelle subcompartment;trans-Golgi network;trans-Golgi network membrane		0	1.92553	-0.218734	-4.74751	Q13795;Q13795-2;Q13795-3;Q13795-4	Q13795	ARFRP_HUMAN	ARFRP1	ARFRP1	ADP-ribosylation factor-related protein 1	3660.31	3710.27	3887.29	3	3114.52	3393.95	3169.11	3	ARFRP1
Q49A26-5	Q49A26-5	GLYR1_HUMAN	GLYR1	GLYR1	Isoform 5 of Cytokine-like nuclear factor N-PAC	1.25759	0.0119315	0.331971	0.800008	69968.9	65850.5	61035.6	78387.2	84110.7	85064.9	16.0944	16.0069	15.8974	16.2583	16.36	16.3763	+	EtOH_Cnrtl	Cluster -224	cellular component organization;cellular component organization or biogenesis;cellular process;chromatin organization;chromatin remodeling;protein-containing complex organization;protein-DNA complex organization;transcription elongation-coupled chromatin remodeling;transcription initiation-coupled chromatin remodeling	adenyl nucleotide binding;binding;catalytic activity;chromatin binding;chromatin-protein adaptor activity;DNA binding;heterocyclic compound binding;histone binding;methylated histone binding;methylation-dependent protein binding;modification-dependent protein binding;molecular adaptor activity;NAD binding;NADP binding;nucleic acid binding;nucleoside phosphate binding;nucleosome binding;nucleotide…	cellular anatomical entity;chromatin;cytosol;nucleoplasm;nucleosome;protein-containing complex;protein-DNA complex		0	1.9233	0.331971	4.88856	Q49A26-5	Q49A26-5	GLYR1_HUMAN	GLYR1	GLYR1	Isoform 5 of Cytokine-like nuclear factor N-PAC	69968.9	65850.5	61035.6	3	78387.2	84110.7	85064.9	3	GLYR1
Q9NQT8	Q9NQT8	KI13B_HUMAN	KIF13B	KIF13B	Kinesin-like protein KIF13B	1.08531	0.0120406	0.118236	0.0785365	40313.3	40300.8	39173.5	43323	43437.6	43246.2	15.299	15.2985	15.2576	15.4028	15.4067	15.4003	+	EtOH_Cnrtl	Cluster -224	biological regulation;cell activation;cellular localization;cellular macromolecule localization;cellular process;cytoskeleton-dependent intracellular transport;establishment of localization;establishment of localization in cell;establishment of protein localization;immune system process;intracellular transport;leukocyte activation;localization;lymphocyte activation;macromolecule localization;micr…	14-3-3 protein binding;adenyl nucleotide binding;adenyl ribonucleotide binding;anion binding;ATP binding;ATP hydrolysis activity;ATP-dependent activity;binding;carbohydrate derivative binding;catalytic activity;cytoskeletal motor activity;cytoskeletal protein binding;enzyme binding;heterocyclic compound binding;hydrolase activity;hydrolase activity, acting on acid anhydrides;hydrolase activity, a…	axon;cell projection;cellular anatomical entity;cytoplasm;kinesin complex;microtubule;microtubule associated complex;neuron projection;plasma membrane bounded cell projection;polymeric cytoskeletal fiber;protein-containing complex;supramolecular complex;supramolecular fiber;supramolecular polymer		0	1.91935	0.118236	8.54119	Q9NQT8	Q9NQT8	KI13B_HUMAN	KIF13B	KIF13B	Kinesin-like protein KIF13B	40313.3	40300.8	39173.5	3	43323	43437.6	43246.2	3	KIF13B
Q9P032	Q9P032	NDUF4_HUMAN	NDUFAF4	NDUFAF4	NADH dehydrogenase [ubiquinone] 1 alpha subcomplex assembly factor 4	1.1535	0.0120782	0.206477	0.376396	38104.2	39881.7	41537	44403.3	47053.4	46413.3	15.2177	15.2834	15.3421	15.4384	15.522	15.5023	+	EtOH_Cnrtl	Cluster -224	biological process involved in interspecies interaction between organisms;biological regulation;cellular component assembly;cellular component organization;cellular component organization or biogenesis;cellular process;defense response;defense response to other organism;defense response to symbiont;defense response to virus;mitochondrial respiratory chain complex assembly;mitochondrial respirator…	binding;calmodulin binding;protein binding	cellular anatomical entity;cytosol;intracellular membrane-bounded organelle;intracellular organelle;membrane;membrane-bounded organelle;mitochondrial inner membrane;mitochondrial membrane;mitochondrion;organelle;organelle inner membrane;organelle membrane		0	1.918	0.206477	4.70127	Q9P032	Q9P032	NDUF4_HUMAN	NDUFAF4	NDUFAF4	NADH dehydrogenase [ubiquinone] 1 alpha subcomplex assembly factor 4	38104.2	39881.7	41537	3	44403.3	47053.4	46413.3	3	NDUFAF4
Q5SXM2	Q5SXM2	SNPC4_HUMAN	SNAPC4	SNAPC4	snRNA-activating protein complex subunit 4	1.20728	0.0123483	0.272419	0.598987	4444.22	4490.48	4932.07	5506.77	5856.34	5377.91	12.1177	12.1327	12.268	12.427	12.5158	12.3928	+	EtOH_Cnrtl	Cluster -224	aromatic compound biosynthetic process;biosynthetic process;cellular aromatic compound metabolic process;cellular biosynthetic process;cellular metabolic process;cellular nitrogen compound biosynthetic process;cellular nitrogen compound metabolic process;cellular process;DNA-templated transcription;heterocycle biosynthetic process;heterocycle metabolic process;macromolecule biosynthetic process;m…	binding;cis-regulatory region sequence-specific DNA binding;DNA binding;double-stranded DNA binding;general transcription initiation factor activity;nucleic acid binding;organic cyclic compound binding;RNA polymerase II general transcription initiation factor activity;RNA polymerase III cis-regulatory region sequence-specific DNA binding;RNA polymerase III general transcription initiation factor …	cellular anatomical entity;intracellular membrane-bounded organelle;intracellular organelle;membrane-bounded organelle;nucleoplasm;nucleus;organelle;protein-containing complex;snRNA-activating protein complex;transcription regulator complex		0	1.90839	0.272419	4.52348	Q5SXM2	Q5SXM2	SNPC4_HUMAN	SNAPC4	SNAPC4	snRNA-activating protein complex subunit 4	4444.22	4490.48	4932.07	3	5506.77	5856.34	5377.91	3	SNAPC4
Q8N565;Q8N565-2	Q8N565	MREG_HUMAN	MREG	MREG	Melanoregulin	0.623116	0.0127872	-0.685122	2.63324	5433.86	4981.63	6320.26	3723.02	2923.27	3782.02	12.4078	12.2824	12.6258	11.8623	11.5134	11.8849	+	EtOH_Cnrtl	Cluster -223	cell differentiation;cellular component organization;cellular component organization or biogenesis;cellular developmental process;cellular localization;cellular process;cytoskeleton-dependent intracellular transport;developmental process;establishment of localization;establishment of localization in cell;establishment of melanosome localization;establishment of organelle localization;establishmen…	binding;lipid binding;phosphatidylinositol binding;phospholipid binding	apical plasma membrane;bounding membrane of organelle;cellular anatomical entity;cytoplasmic vesicle;cytoplasmic vesicle membrane;endosome membrane;intracellular membrane-bounded organelle;intracellular organelle;intracellular vesicle;late endosome membrane;lysosomal membrane;lytic vacuole membrane;melanosome;melanosome membrane;membrane;membrane-bounded organelle;organelle;organelle membrane;pig…		1	1.89322	-0.685122	-4.37486	Q8N565;Q8N565-2	Q8N565	MREG_HUMAN	MREG	MREG	Melanoregulin	5433.86	4981.63	6320.26	3	3723.02		3782.02	2	MREG
Q86U86-8;Q86U86	Q86U86-8	PB1_HUMAN	PBRM1	PBRM1	Protein polybromo-1	1.13148	0.0132161	0.178047	0.28043	51343.3	54776.2	53448.6	57986.4	62503.4	60058.5	15.6479	15.7413	15.7059	15.8234	15.9316	15.8741	+	EtOH_Cnrtl	Cluster -224	aromatic compound biosynthetic process;biological regulation;biosynthetic process;cell cycle;cellular aromatic compound metabolic process;cellular biosynthetic process;cellular component organization;cellular component organization or biogenesis;cellular metabolic process;cellular nitrogen compound biosynthetic process;cellular nitrogen compound metabolic process;cellular process;chromatin organi…	binding;chromatin binding;DNA binding;nucleic acid binding;organic cyclic compound binding;protein-containing complex binding	ATPase complex;catalytic complex;cellular anatomical entity;chromatin;chromosome;intracellular membrane-bounded organelle;intracellular non-membrane-bounded organelle;intracellular organelle;kinetochore;membrane-bounded organelle;non-membrane-bounded organelle;nuclear chromosome;nuclear matrix;nuclear protein-containing complex;nucleoplasm;nucleus;organelle;protein-containing complex;protein-DNA …		0	1.8789	0.178047	4.29558	Q86U86-8;Q86U86	Q86U86-8	PB1_HUMAN	PBRM1	PBRM1	Protein polybromo-1	51343.3	54776.2	53448.6	3	57986.4	62503.4	60058.5	3	PBRM1
Q9P0L0	Q9P0L0	VAPA_HUMAN	VAPA	VAPA	Vesicle-associated membrane protein-associated protein A	1.19647	0.013458	0.259259	0.554565	322054	337480	302105	366081	401268	383228	18.2969	18.3644	18.2047	18.4818	18.6142	18.5478	+	EtOH_Cnrtl	Cluster -224	amide biosynthetic process;amide metabolic process;amide transport;biological process involved in interaction with host;biological process involved in interaction with symbiont;biological process involved in interspecies interaction between organisms;biological process involved in symbiotic interaction;biological regulation;biosynthetic process;cell projection organization;cellular biosynthetic p…	binding;cadherin binding;cell adhesion molecule binding;cytoskeletal protein binding;FFAT motif binding;identical protein binding;microtubule binding;protein binding;protein dimerization activity;protein domain specific binding;protein heterodimerization activity;protein homodimerization activity;tubulin binding	anchoring junction;azurophil granule membrane;bicellular tight junction;bounding membrane of organelle;cell junction;cell-cell junction;cellular anatomical entity;cytoplasmic vesicle membrane;cytoskeleton;cytosol;endoplasmic reticulum;endoplasmic reticulum membrane;Golgi membrane;intracellular membrane-bounded organelle;intracellular non-membrane-bounded organelle;intracellular organelle;lysosoma…	Tight junction	0	1.87102	0.259259	4.31822	Q9P0L0	Q9P0L0	VAPA_HUMAN	VAPA	VAPA	Vesicle-associated membrane protein-associated protein A	322054	337480	302105	3	366081	401268	383228	3	VAPA
P29353;P29353-6	P29353	SHC1_HUMAN	SHC1	SHC1	SHC-transforming protein 1	1.14899	0.0142729	0.200061	0.35474	49307	52482.5	52432	61616.1	59125.5	56457.8	15.5895	15.6795	15.6782	15.911	15.8515	15.7849	+	EtOH_Cnrtl	Cluster -224	actin cytoskeleton organization;actin filament-based process;anatomical structure development;anatomical structure formation involved in morphogenesis;angiogenesis;animal organ development;biological process involved in interspecies interaction between organisms;biological regulation;cell adhesion;cell surface receptor signaling pathway;cell-cell adhesion;cellular component organization;cellular …	binding;cytokine receptor binding;enzyme binding;ephrin receptor binding;epidermal growth factor binding;epidermal growth factor receptor binding;growth factor binding;growth factor receptor binding;hormone binding;insulin receptor binding;insulin-like growth factor receptor binding;kinase binding;lipid binding;molecular adaptor activity;neurotrophin receptor binding;neurotrophin TRK receptor bin…	anchoring junction;cell junction;cell-substrate junction;cellular anatomical entity;cytosol;focal adhesion;intracellular organelle lumen;membrane;membrane protein complex;membrane-enclosed lumen;mitochondrial matrix;organelle lumen;plasma membrane;plasma membrane protein complex;protein-containing complex;Shc-EGFR complex	Bacterial invasion of epithelial cells;Chemokine signaling pathway;Chronic myeloid leukemia;ErbB signaling pathway;Focal adhesion;Glioma;Insulin signaling pathway;Natural killer cell mediated cytotoxicity;Neurotrophin signaling pathway	0	1.84549	0.200061	4.25143	P29353;P29353-6	P29353	SHC1_HUMAN	SHC1	SHC1	SHC-transforming protein 1	49307	52482.5	52432	3	61616.1	59125.5	56457.8	3	SHC1
Q07065	Q07065	CKAP4_HUMAN	CKAP4	CKAP4	Cytoskeleton-associated protein 4	1.2747	0.0150237	0.348535	0.855921	26884	29297.6	29558.7	35963.9	39492.1	33837.1	14.7145	14.8385	14.8513	15.1343	15.2693	15.0463	+	EtOH_Cnrtl	Cluster -224		binding;nucleic acid binding;organic cyclic compound binding;RNA binding	azurophil granule membrane;bounding membrane of organelle;cellular anatomical entity;cytoplasmic vesicle;cytoplasmic vesicle membrane;cytoskeleton;endoplasmic reticulum;endoplasmic reticulum lumen;endoplasmic reticulum membrane;extracellular exosome;extracellular membrane-bounded organelle;extracellular organelle;extracellular vesicle;intracellular membrane-bounded organelle;intracellular non-mem…	Protein processing in endoplasmic reticulum	0	1.82322	0.348535	4.45957	Q07065	Q07065	CKAP4_HUMAN	CKAP4	CKAP4	Cytoskeleton-associated protein 4	26884	29297.6	29558.7	3	35963.9	39492.1	33837.1	3	CKAP4
Q8N5I4	Q8N5I4	DHRSX_HUMAN	DHRSX	DHRSX	Dehydrogenase/reductase SDR family member on chromosome X	1.093	0.0150423	0.128045	0.111647	21429	21580.6	21144.3	23039.3	24057.2	23024	14.3873	14.3974	14.368	14.4918	14.5542	14.4909	+	EtOH_Cnrtl	Cluster -224	biological regulation;positive regulation of autophagy;positive regulation of biological process;positive regulation of catabolic process;positive regulation of cellular catabolic process;positive regulation of cellular metabolic process;positive regulation of cellular process;positive regulation of metabolic process;regulation of autophagy;regulation of biological process;regulation of catabolic…	catalytic activity;oxidoreductase activity	cellular anatomical entity;extracellular region		0	1.82268	0.128045	5.64965	Q8N5I4	Q8N5I4	DHRSX_HUMAN	DHRSX	DHRSX	Dehydrogenase/reductase SDR family member on chromosome X	21429	21580.6	21144.3	3	23039.3	24057.2	23024	3	DHRSX
P42680	P42680	TEC_HUMAN	TEC	TEC	Tyrosine-protein kinase Tec	1.12271	0.0150509	0.166779	0.242394	9189.21	9349.49	8808.5	10669.8	9957.26	10076	13.1657	13.1907	13.1047	13.3812	13.2815	13.2986	+	EtOH_Cnrtl	Cluster -224	activation of immune response;adaptive immune response;anatomical structure development;antigen receptor-mediated signaling pathway;B cell receptor signaling pathway;biological regulation;cell surface receptor signaling pathway;cellular metabolic process;cellular process;developmental growth;developmental process;growth;immune response;immune response-activating cell surface receptor signaling pa…	adenyl nucleotide binding;adenyl ribonucleotide binding;anion binding;ATP binding;binding;carbohydrate derivative binding;catalytic activity;catalytic activity, acting on a protein;cation binding;heterocyclic compound binding;ion binding;kinase activity;lipid binding;metal ion binding;non-membrane spanning protein tyrosine kinase activity;nucleoside phosphate binding;nucleotide binding;organic cy…	cellular anatomical entity;cytoskeleton;cytosol;intracellular non-membrane-bounded organelle;intracellular organelle;membrane;non-membrane-bounded organelle;organelle;plasma membrane	Osteoclast differentiation;T cell receptor signaling pathway	0	1.82244	0.166779	4.16928	P42680	P42680	TEC_HUMAN	TEC	TEC	Tyrosine-protein kinase Tec	9189.21	9349.49	8808.5	3	10669.8	9957.26	10076	3	TEC
P54819;P54819-2	P54819	KAD2_HUMAN	AK2	AK2	Adenylate kinase 2, mitochondrial	1.12889	0.0150515	0.174789	0.269434	611888	575824	610826	654824	670527	705000	19.2229	19.1353	19.2204	19.3207	19.3549	19.4273	+	EtOH_Cnrtl	Cluster -224	ADP biosynthetic process;ADP metabolic process;AMP metabolic process;aromatic compound biosynthetic process;ATP metabolic process;biosynthetic process;carbohydrate derivative biosynthetic process;carbohydrate derivative metabolic process;cellular aromatic compound metabolic process;cellular biosynthetic process;cellular metabolic process;cellular nitrogen compound biosynthetic process;cellular ni…	adenyl nucleotide binding;adenyl ribonucleotide binding;adenylate kinase activity;anion binding;ATP binding;binding;carbohydrate derivative binding;catalytic activity;heterocyclic compound binding;ion binding;kinase activity;nucleobase-containing compound kinase activity;nucleoside monophosphate kinase activity;nucleoside phosphate binding;nucleotide binding;organic cyclic compound binding;phosph…	cellular anatomical entity;cytoplasm;extracellular exosome;extracellular membrane-bounded organelle;extracellular organelle;extracellular vesicle;intracellular membrane-bounded organelle;intracellular organelle;intracellular organelle lumen;membrane-bounded organelle;membrane-enclosed lumen;mitochondrial intermembrane space;mitochondrion;organelle;organelle envelope lumen;organelle lumen;sperm mi…	Purine metabolism	0	1.82242	0.174789	4.10213	P54819;P54819-2	P54819	KAD2_HUMAN	AK2	AK2	Adenylate kinase 2, mitochondrial	611888	575824	610826	3	654824	670527	705000	3	AK2
Q09666	Q09666	AHNK_HUMAN	AHNAK	AHNAK	Neuroblast differentiation-associated protein AHNAK	1.22093	0.0152375	0.288755	0.65413	231428	214181	203490	278994	260982	252526	17.8202	17.7085	17.6346	18.0899	17.9936	17.9461	+	EtOH_Cnrtl	Cluster -224	biological regulation;positive regulation of biological process;positive regulation of cellular component organization;positive regulation of cellular process;positive regulation of plasma membrane repair;regulation of biological process;regulation of biosynthetic process;regulation of calcium ion transmembrane transport;regulation of calcium ion transmembrane transporter activity;regulation of c…	binding;cadherin binding;cell adhesion molecule binding;identical protein binding;nucleic acid binding;organic cyclic compound binding;protein binding;RNA binding;S100 protein binding;structural molecule activity;structural molecule activity conferring elasticity	actin cytoskeleton;anchoring junction;bounding membrane of organelle;cell junction;cell-cell contact zone;cell-cell junction;cell-substrate junction;cellular anatomical entity;costamere;cytoplasm;cytoskeleton;cytosol;extracellular exosome;extracellular membrane-bounded organelle;extracellular organelle;extracellular vesicle;focal adhesion;intracellular membrane-bounded organelle;intracellular non…		0	1.81709	0.288755	4.21195	Q09666	Q09666	AHNK_HUMAN	AHNAK	AHNAK	Neuroblast differentiation-associated protein AHNAK	231428	214181	203490	3	278994	260982	252526	3	AHNAK
P12694	P12694	ODBA_HUMAN	BCKDHA	BCKDHA	2-oxoisovalerate dehydrogenase subunit alpha, mitochondrial	1.18797	0.0157276	0.247556	0.515062	64008.4	67777.4	64232.2	81499.3	73110.2	78254.3	15.966	16.0485	15.971	16.3145	16.1578	16.2559	+	EtOH_Cnrtl	Cluster -224	amino acid catabolic process;amino acid metabolic process;branched-chain amino acid catabolic process;branched-chain amino acid metabolic process;carboxylic acid catabolic process;carboxylic acid metabolic process;catabolic process;cellular catabolic process;cellular metabolic process;cellular process;metabolic process;nitrogen compound metabolic process;organic acid catabolic process;organic aci…	3-methyl-2-oxobutanoate dehydrogenase (2-methylpropanoyl-transferring) activity;binding;carbon-carbon lyase activity;carboxy-lyase activity;catalytic activity;cation binding;ion binding;lyase activity;metal ion binding;oxidoreductase activity;oxidoreductase activity, acting on the aldehyde or oxo group of donors;oxidoreductase activity, acting on the aldehyde or oxo group of donors, disulfide as …	catalytic complex;cellular anatomical entity;dihydrolipoyl dehydrogenase complex;intracellular membrane-bounded organelle;intracellular organelle;intracellular organelle lumen;membrane-bounded organelle;membrane-enclosed lumen;mitochondrial alpha-ketoglutarate dehydrogenase complex;mitochondrial matrix;mitochondrial protein-containing complex;mitochondrial tricarboxylic acid cycle enzyme complex;…	Valine, leucine and isoleucine degradation	0	1.80334	0.247556	4.67535	P12694	P12694	ODBA_HUMAN	BCKDHA	BCKDHA	2-oxoisovalerate dehydrogenase subunit alpha, mitochondrial	64008.4	67777.4	64232.2	3	81499.3	73110.2	78254.3	3	BCKDHA
Q7Z5H3;Q7Z5H3-5	Q7Z5H3	RHG22_HUMAN	ARHGAP22	ARHGAP22	Rho GTPase-activating protein 22	0.854867	0.0158067	-0.22584	1.08291	23137.7	22203.3	20912.8	18121.7	18809	19707.5	14.498	14.4385	14.3521	14.1454	14.1991	14.2665	+	EtOH_Cnrtl	Cluster -223	anatomical structure formation involved in morphogenesis;angiogenesis;biological regulation;cell differentiation;cellular developmental process;cellular process;developmental process;regulation of biological process;regulation of cell communication;regulation of cellular component organization;regulation of cellular process;regulation of intracellular signal transduction;regulation of postsynapse…	enzyme activator activity;enzyme regulator activity;GTPase activator activity;GTPase regulator activity;molecular function activator activity;molecular function regulator activity;nucleoside-triphosphatase regulator activity	anchoring junction;cell junction;cell-substrate junction;cellular anatomical entity;cytosol;focal adhesion;glutamatergic synapse;intracellular membrane-bounded organelle;intracellular organelle;membrane-bounded organelle;nucleus;organelle;synapse		0	1.80116	-0.22584	-4.11037	Q7Z5H3;Q7Z5H3-5	Q7Z5H3	RHG22_HUMAN	ARHGAP22	ARHGAP22	Rho GTPase-activating protein 22	23137.7	22203.3	20912.8	3	18121.7	18809	19707.5	3	ARHGAP22
P11717	P11717	MPRI_HUMAN	IGF2R	IGF2R	Cation-independent mannose-6-phosphate receptor	1.05196	0.0158279	0.0730101	0.0741263	80293.2	78451.3	79592.7	84982.3	83536.3	82202.2	16.293	16.2595	16.2803	16.3749	16.3501	16.3269	+	EtOH_Cnrtl	Cluster -224	anatomical structure development;animal organ development;animal organ regeneration;biological process involved in interaction with symbiont;biological process involved in interspecies interaction between organisms;biological process involved in symbiotic interaction;biological regulation;cellular localization;cellular process;developmental process;developmental process involved in reproduction;e…	anion binding;binding;carbohydrate binding;carboxylic acid binding;catalytic activity;catalytic activity, acting on a protein;enzyme binding;G-protein alpha-subunit binding;growth factor binding;identical protein binding;insulin-like growth factor binding;insulin-like growth factor II binding;insulin-like growth factor receptor activity;ion binding;isoprenoid binding;kinase activity;lipid binding…	anchoring junction;bounding membrane of organelle;cell junction;cell surface;cell-substrate junction;cellular anatomical entity;clathrin coat;clathrin-coated endocytic vesicle membrane;clathrin-coated vesicle;clathrin-coated vesicle membrane;coated vesicle;coated vesicle membrane;cytoplasmic vesicle;cytoplasmic vesicle membrane;early endosome;endocytic vesicle;endocytic vesicle membrane;endosome;…	Lysosome	0	1.80058	0.0730101	4.30801	P11717	P11717	MPRI_HUMAN	IGF2R	IGF2R	Cation-independent mannose-6-phosphate receptor	80293.2	78451.3	79592.7	3	84982.3	83536.3	82202.2	3	IGF2R
P49450;P49450-2	P49450	CENPA_HUMAN	CENPA	CENPA	Histone H3-like centromeric protein A	1.30823	0.0163754	0.386851	0.985259	7009.95	7166.05	8087.27	10699.8	9192.38	9233.25	12.7752	12.807	12.9814	13.3853	13.1662	13.1726	+	EtOH_Cnrtl	Cluster -224	cell cycle process;cellular component assembly;cellular component organization;cellular component organization or biogenesis;cellular localization;cellular macromolecule localization;cellular process;CENP-A containing chromatin assembly;chromatin organization;chromatin remodeling;chromatin remodeling at centromere;chromosome organization;cytokinesis;cytoskeleton organization;cytoskeleton-dependen…	binding;chromatin binding;DNA binding;nucleic acid binding;organic cyclic compound binding;protein binding;protein dimerization activity;protein heterodimerization activity;protein-containing complex binding;structural constituent of chromatin;structural molecule activity	cellular anatomical entity;CENP-A containing nucleosome;chromatin;chromosomal region;chromosome, centromeric region;condensed chromosome, centromeric region;cytosol;heterochromatin;intracellular membrane-bounded organelle;intracellular organelle;membrane-bounded organelle;nucleoplasm;nucleosome;nucleus;organelle;pericentric heterochromatin;protein-containing complex;protein-DNA complex		0	1.78581	0.386851	4.01322	P49450;P49450-2	P49450	CENPA_HUMAN	CENPA	CENPA	Histone H3-like centromeric protein A	7009.95	7166.05	8087.27	3	10699.8	9192.38	9233.25	3	CENPA
Q9HBA0;Q9HBA0-2;Q9HBA0-3;Q9HBA0-4;Q9HBA0-5;Q9HBA0-6	Q9HBA0	TRPV4_HUMAN	TRPV4	TRPV4	Transient receptor potential cation channel subfamily V member 4	1.34299	0.017065	0.427011	1.12082	7246.26	7147.34	8532.68	9892.91	9664.96	11231.8	12.823	12.8032	13.0588	13.2722	13.2385	13.4553	+	EtOH_Cnrtl	Cluster -224	actin cytoskeleton organization;actin filament organization;actin filament-based process;adaptive thermogenesis;amide transport;anatomical structure development;animal organ development;biological regulation;blood vessel endothelial cell delamination;calcium ion homeostasis;calcium ion import;calcium ion import into cytosol;calcium ion transmembrane transport;calcium ion transport;carbohydrate ho…	actin binding;actin filament binding;adenyl nucleotide binding;adenyl ribonucleotide binding;alpha-tubulin binding;anion binding;ATP binding;beta-tubulin binding;binding;calcium channel activity;calcium ion transmembrane transporter activity;calmodulin binding;carbohydrate derivative binding;cation binding;channel activity;cytoskeletal protein binding;enzyme binding;gated channel activity;heteroc…	actin-based cell projection;adherens junction;anchoring junction;apical plasma membrane;cell junction;cell projection;cell projection membrane;cell surface;cell-cell junction;cell-substrate junction;cellular anatomical entity;cilium;cortical actin cytoskeleton;cortical cytoskeleton;cytoplasmic microtubule;cytoskeleton;endoplasmic reticulum;filopodium;focal adhesion;growth cone;intracellular membr…		0	1.76789	0.427011	4.02142	Q9HBA0;Q9HBA0-2;Q9HBA0-3;Q9HBA0-4;Q9HBA0-5;Q9HBA0-6	Q9HBA0	TRPV4_HUMAN	TRPV4	TRPV4	Transient receptor potential cation channel subfamily V member 4	7246.26	7147.34	8532.68	3	9892.91	9664.96	11231.8	3	TRPV4
Q9P258	Q9P258	RCC2_HUMAN	RCC2	RCC2	Protein RCC2	1.17629	0.0170827	0.233864	0.468843	648619	680211	620756	731215	751318	810748	19.307	19.3756	19.2437	19.4799	19.5191	19.6289	+	EtOH_Cnrtl	Cluster -224	biological regulation;cell cycle;cell division;cell junction assembly;cell junction organization;cell surface receptor signaling pathway;cell-substrate junction assembly;cell-substrate junction organization;cellular component assembly;cellular component organization;cellular component organization or biogenesis;cellular localization;cellular macromolecule localization;cellular process;chromosome …	binding;cytoskeletal protein binding;enzyme binding;enzyme regulator activity;GTPase binding;GTPase regulator activity;guanyl-nucleotide exchange factor activity;kinase binding;microtubule binding;molecular function regulator activity;nucleic acid binding;nucleoside-triphosphatase regulator activity;organic cyclic compound binding;protein binding;protein domain specific binding;protein kinase bin…	bounding membrane of organelle;cellular anatomical entity;chromosomal region;chromosome, centromeric core domain;cytoplasmic vesicle membrane;cytosol;early endosome membrane;endosome membrane;intracellular non-membrane-bounded organelle;intracellular organelle;membrane;microtubule;midbody;mitotic spindle midzone;non-membrane-bounded organelle;nucleolus;organelle;organelle membrane;plasma membrane…		0	1.76744	0.233864	3.98751	Q9P258	Q9P258	RCC2_HUMAN	RCC2	RCC2	Protein RCC2	648619	680211	620756	3	731215	751318	810748	3	RCC2
Q8NEY8-2;Q8NEY8-8	Q8NEY8-2	PPHLN_HUMAN	PPHLN1	PPHLN1	Isoform 2 of Periphilin-1	1.17371	0.0174627	0.230338	0.45694	44218.9	41288	41602.8	47497.9	52758.9	48932.8	15.4324	15.3334	15.3444	15.5356	15.6871	15.5785	+	EtOH_Cnrtl	Cluster -224	biological regulation;cellular component organization;cellular component organization or biogenesis;cellular localization;cellular macromolecule localization;cellular process;chromatin organization;chromatin remodeling;epigenetic regulation of gene expression;keratinization;localization;macromolecule localization;multicellular organismal process;negative regulation of biological process;negative …	binding;nucleic acid binding;organic cyclic compound binding;RNA binding	cellular anatomical entity;chromosome;cytosol;Golgi apparatus;intracellular membrane-bounded organelle;intracellular non-membrane-bounded organelle;intracellular organelle;membrane-bounded organelle;non-membrane-bounded organelle;nucleoplasm;organelle		0	1.75789	0.230338	4.19534	Q8NEY8-2;Q8NEY8-8	Q8NEY8-2	PPHLN_HUMAN	PPHLN1	PPHLN1	Isoform 2 of Periphilin-1	44218.9	41288	41602.8	3	47497.9	52758.9	48932.8	3	PPHLN1
O43684;O43684-2	O43684	BUB3_HUMAN	BUB3	BUB3	Mitotic checkpoint protein BUB3	0.869789	0.0181125	-0.200553	0.997552	194539	186278	202467	166019	171172	170143	17.5697	17.5071	17.6273	17.341	17.3851	17.3764	+	EtOH_Cnrtl	Cluster -223	attachment of spindle microtubules to kinetochore;biological regulation;cell cycle;cell cycle checkpoint signaling;cell cycle process;cell division;cellular localization;cellular macromolecule localization;cellular process;intracellular signal transduction;localization;macromolecule localization;meiotic cell cycle;mitotic cell cycle checkpoint signaling;mitotic cell cycle process;mitotic spindle …	binding;protein binding;ubiquitin binding;ubiquitin-like protein binding	bub1-bub3 complex;cellular anatomical entity;cytosol;intracellular non-membrane-bounded organelle;intracellular organelle;kinetochore;mitotic checkpoint complex;non-membrane-bounded organelle;nuclear protein-containing complex;nucleoplasm;organelle;protein-containing complex;supramolecular complex	Cell cycle;Cell cycle - yeast	0	1.74202	-0.200553	-5.38477	O43684;O43684-2	O43684	BUB3_HUMAN	BUB3	BUB3	Mitotic checkpoint protein BUB3	194539	186278	202467	3	166019	171172	170143	3	BUB3
P18859;P18859-2	P18859	ATP5J_HUMAN	ATP5PF	ATP5PF	ATP synthase-coupling factor 6, mitochondrial	1.18386	0.0181391	0.242817	0.499064	1.03e+06	1.08e+06	990023	1.29e+06	1.15e+06	1.23e+06	19.9742	20.0426	19.9171	20.2989	20.1332	20.2302	+	EtOH_Cnrtl	Cluster -224	anatomical structure development;aromatic compound biosynthetic process;ATP biosynthetic process;ATP metabolic process;biosynthetic process;carbohydrate derivative biosynthetic process;carbohydrate derivative metabolic process;cellular aromatic compound metabolic process;cellular biosynthetic process;cellular metabolic process;cellular nitrogen compound biosynthetic process;cellular nitrogen comp…	inorganic cation transmembrane transporter activity;inorganic molecular entity transmembrane transporter activity;monoatomic cation transmembrane transporter activity;monoatomic ion transmembrane transporter activity;proton transmembrane transporter activity;transmembrane transporter activity;transporter activity	ATPase complex;catalytic complex;cellular anatomical entity;inner mitochondrial membrane protein complex;intracellular membrane-bounded organelle;intracellular organelle;membrane;membrane protein complex;membrane-bounded organelle;mitochondrial inner membrane;mitochondrial membrane;mitochondrial protein-containing complex;mitochondrial proton-transporting ATP synthase complex;mitochondrial proton…	Alzheimer's disease;Huntington's disease;Oxidative phosphorylation;Parkinson's disease	0	1.74138	0.242817	4.03167	P18859;P18859-2	P18859	ATP5J_HUMAN	ATP5PF	ATP5PF	ATP synthase-coupling factor 6, mitochondrial	1030000	1080000	990023	3	1290000	1150000	1230000	3	ATP5PF
Q13546	Q13546	RIPK1_HUMAN	RIPK1	RIPK1	Receptor-interacting serine/threonine-protein kinase 1	0.944342	0.0182088	-0.0826518	0.59957	95120.5	91960.4	93141.3	89145.4	86281	89199.3	16.5375	16.4887	16.5071	16.4439	16.3968	16.4447	+	EtOH_Cnrtl	Cluster -223	amyloid fibril formation;apoptotic process;apoptotic signaling pathway;biological regulation;catabolic process;cell death;cell surface receptor signaling pathway;cellular component assembly;cellular component organization;cellular component organization or biogenesis;cellular metabolic process;cellular process;cellular response to chemical stimulus;cellular response to chemical stress;cellular re…	adenyl nucleotide binding;adenyl ribonucleotide binding;anion binding;ATP binding;binding;carbohydrate derivative binding;catalytic activity;catalytic activity, acting on a protein;cytokine receptor binding;death domain binding;death receptor binding;enzyme binding;heterocyclic compound binding;identical protein binding;ion binding;JUN kinase kinase kinase activity;kinase activity;MAP kinase kina…	bounding membrane of organelle;catalytic complex;cellular anatomical entity;cytoplasmic vesicle membrane;cytosol;death-inducing signaling complex;endosome membrane;intracellular membrane-bounded organelle;intracellular organelle;membrane;membrane protein complex;membrane-bounded organelle;mitochondrion;organelle;organelle membrane;plasma membrane;plasma membrane protein complex;protein-containing…	Apoptosis;Cytosolic DNA-sensing pathway;Hepatitis C;RIG-I-like receptor signaling pathway;Toll-like receptor signaling pathway	0	1.73972	-0.0826518	-3.88223	Q13546	Q13546	RIPK1_HUMAN	RIPK1	RIPK1	Receptor-interacting serine/threonine-protein kinase 1	95120.5	91960.4	93141.3	3	89145.4	86281	89199.3	3	RIPK1
P55084	P55084	ECHB_HUMAN	HADHB	HADHB	Trifunctional enzyme subunit beta, mitochondrial	1.19411	0.018242	0.25495	0.540021	559544	516418	543006	684589	606416	642218	19.0939	18.9782	19.0506	19.3849	19.2099	19.2927	+	EtOH_Cnrtl	Cluster -224	biosynthetic process;carboxylic acid catabolic process;carboxylic acid metabolic process;catabolic process;cellular biosynthetic process;cellular catabolic process;cellular lipid catabolic process;cellular lipid metabolic process;cellular metabolic process;cellular process;cellular response to biotic stimulus;cellular response to chemical stimulus;cellular response to lipid;cellular response to l…	3-hydroxyacyl-CoA dehydrogenase activity;acetyl-CoA C-acetyltransferase activity;acetyl-CoA C-acyltransferase activity;acetyl-CoA C-myristoyltransferase activity;acetyltransferase activity;acyltransferase activity;acyltransferase activity, transferring groups other than amino-acyl groups;binding;C-acetyltransferase activity;C-acyltransferase activity;carbon-oxygen lyase activity;catalytic activit…	bounding membrane of organelle;catalytic complex;cellular anatomical entity;endoplasmic reticulum;envelope;fatty acid beta-oxidation multienzyme complex;intracellular membrane-bounded organelle;intracellular non-membrane-bounded organelle;intracellular organelle;membrane;membrane-bounded organelle;mitochondrial envelope;mitochondrial fatty acid beta-oxidation multienzyme complex;mitochondrial inn…	Benzoate degradation;Fatty acid elongation in mitochondria;Fatty acid metabolism;Valine, leucine and isoleucine degradation	0	1.73893	0.25495	4.19597	P55084	P55084	ECHB_HUMAN	HADHB	HADHB	Trifunctional enzyme subunit beta, mitochondrial	559544	516418	543006	3	684589	606416	642218	3	HADHB
P57678	P57678	GEMI4_HUMAN	GEMIN4	GEMIN4	Gem-associated protein 4	0.788127	0.0184872	-0.345373	1.4864	15880.4	17290	15631.4	11943.2	12502.7	14016.1	13.955	14.0777	13.9322	13.5439	13.61	13.7748	+	EtOH_Cnrtl	Cluster -223	cellular aromatic compound metabolic process;cellular component assembly;cellular component organization;cellular component organization or biogenesis;cellular metabolic process;cellular nitrogen compound metabolic process;cellular process;heterocycle metabolic process;macromolecule metabolic process;metabolic process;ncRNA metabolic process;ncRNA processing;nitrogen compound metabolic process;nu…	binding;protein-containing complex binding;ribonucleoprotein complex binding	Cajal body;cellular anatomical entity;cytoplasm;cytosol;extracellular exosome;extracellular membrane-bounded organelle;extracellular organelle;extracellular vesicle;Gemini of coiled bodies;intracellular non-membrane-bounded organelle;intracellular organelle;membrane;membrane-bounded organelle;non-membrane-bounded organelle;nuclear body;nuclear protein-containing complex;nucleolus;nucleoplasm;orga…	RNA transport	0	1.73313	-0.345373	-4.20219	P57678	P57678	GEMI4_HUMAN	GEMIN4	GEMIN4	Gem-associated protein 4	15880.4	17290	15631.4	3	11943.2	12502.7	14016.1	3	GEMIN4
O15204;O15204-2	O15204	ADEC1_HUMAN	ADAMDEC1	ADAMDEC1	ADAM DEC1	1.25311	0.018754	0.323858	0.772621	29975.9	29129.1	27092.1	39305.4	34449	34259.9	14.8715	14.8302	14.7256	15.2624	15.0722	15.0642	+	EtOH_Cnrtl	Cluster -224	biological regulation;immune response;immune system process;macromolecule metabolic process;metabolic process;negative regulation of biological process;negative regulation of cell adhesion;negative regulation of cellular process;nitrogen compound metabolic process;organic substance metabolic process;organonitrogen compound metabolic process;primary metabolic process;protein metabolic process;prot…	binding;catalytic activity;catalytic activity, acting on a protein;cation binding;endopeptidase activity;hydrolase activity;ion binding;metal ion binding;metalloendopeptidase activity;metallopeptidase activity;peptidase activity;transition metal ion binding;zinc ion binding	cellular anatomical entity;collagen-containing extracellular matrix;external encapsulating structure;extracellular matrix;extracellular region		0	1.72691	0.323858	4.15237	O15204;O15204-2	O15204	ADEC1_HUMAN	ADAMDEC1	ADAMDEC1	ADAM DEC1	29975.9	29129.1	27092.1	3	39305.4	34449	34259.9	3	ADAMDEC1
Q8WYL5	Q8WYL5	SSH1_HUMAN	SSH1	SSH1	Protein phosphatase Slingshot homolog 1	0.791865	0.0187936	-0.336603	1.45679	39793.6	34442.2	35691	27131.7	28510.2	31405.3	15.2802	15.0719	15.1233	14.7277	14.7992	14.9387	+	EtOH_Cnrtl	Cluster -223	actin cytoskeleton organization;actin filament-based process;anatomical structure morphogenesis;anterograde trans-synaptic signaling;biological regulation;cell communication;cell morphogenesis;cell-cell signaling;cellular component organization;cellular component organization or biogenesis;cellular metabolic process;cellular process;cellular response to ATP;cellular response to chemical stimulus;…	actin binding;binding;catalytic activity;catalytic activity, acting on a protein;cytoskeletal protein binding;hydrolase activity;hydrolase activity, acting on ester bonds;myosin phosphatase activity;phosphatase activity;phosphoprotein phosphatase activity;phosphoric ester hydrolase activity;protein binding;protein serine/threonine phosphatase activity;protein tyrosine phosphatase activity;protein…	cell junction;cell projection;cellular anatomical entity;cleavage furrow;cytoplasm;cytoskeleton;growth cone;intracellular non-membrane-bounded organelle;intracellular organelle;lamellipodium;membrane;midbody;non-membrane-bounded organelle;organelle;plasma membrane;plasma membrane bounded cell projection;plasma membrane region;site of polarized growth;synapse	Regulation of actin cytoskeleton	0	1.72599	-0.336603	-3.81932	Q8WYL5	Q8WYL5	SSH1_HUMAN	SSH1	SSH1	Protein phosphatase Slingshot homolog 1	39793.6	34442.2	35691	3	27131.7	28510.2	31405.3	3	SSH1
Q9Y2W6	Q9Y2W6	TDRKH_HUMAN	TDRKH	TDRKH	Tudor and KH domain-containing protein	1.26822	0.019309	0.344449	0.842129	16125.5	17053.5	19010.6	23194.2	22381.1	20612.5	13.9771	14.0578	14.2145	14.5015	14.45	14.3312	+	EtOH_Cnrtl	Cluster -224	cell cycle process;cellular aromatic compound metabolic process;cellular component organization;cellular component organization or biogenesis;cellular metabolic process;cellular nitrogen compound metabolic process;cellular process;cellular process involved in reproduction in multicellular organism;developmental process;developmental process involved in reproduction;fertilization;gamete generation…	binding;nucleic acid binding;organic cyclic compound binding;RNA binding	cellular anatomical entity;cytoplasmic ribonucleoprotein granule;intracellular membrane-bounded organelle;intracellular non-membrane-bounded organelle;intracellular organelle;membrane-bounded organelle;mitochondrion;non-membrane-bounded organelle;organelle;P granule;pi-body;piP-body;ribonucleoprotein granule;supramolecular complex		0	1.71424	0.344449	4.00403	Q9Y2W6	Q9Y2W6	TDRKH_HUMAN	TDRKH	TDRKH	Tudor and KH domain-containing protein	16125.5	17053.5	19010.6	3	23194.2	22381.1	20612.5	3	TDRKH
Q9NRZ9;Q9NRZ9-2;Q9NRZ9-4;Q9NRZ9-3	Q9NRZ9	HELLS_HUMAN	HELLS	HELLS	Lymphoid-specific helicase	0.786804	0.0195656	-0.344058	1.48196	18570.9	17978.5	21071.2	15050.5	16002.7	14282.9	14.1808	14.134	14.363	13.8775	13.966	13.802	+	EtOH_Cnrtl	Cluster -223	anatomical structure development;animal organ development;apoptotic process;biological regulation;cell activation;cell cycle;cell death;cell division;cell population proliferation;cellular aromatic compound metabolic process;cellular component organization;cellular component organization or biogenesis;cellular metabolic process;cellular nitrogen compound metabolic process;cellular process;cellula…	adenyl nucleotide binding;adenyl ribonucleotide binding;anion binding;ATP binding;ATP-dependent activity;ATP-dependent activity, acting on DNA;ATP-dependent chromatin remodeler activity;binding;carbohydrate derivative binding;catalytic activity;catalytic activity, acting on a nucleic acid;catalytic activity, acting on DNA;chromatin binding;helicase activity;heterocyclic compound binding;hydrolase…	cellular anatomical entity;chromatin;chromosomal region;chromosome, centromeric region;heterochromatin;intracellular membrane-bounded organelle;intracellular organelle;membrane-bounded organelle;nucleus;organelle;pericentric heterochromatin;protein-containing complex;protein-DNA complex		0	1.70851	-0.344058	-4.07562	Q9NRZ9;Q9NRZ9-2;Q9NRZ9-4;Q9NRZ9-3	Q9NRZ9	HELLS_HUMAN	HELLS	HELLS	Lymphoid-specific helicase	18570.9	17978.5	21071.2	3	15050.5	16002.7	14282.9	3	HELLS
P34741	P34741	SDC2_HUMAN	SDC2	SDC2	Syndecan-2	2.88467	0.0198518	1.57164	4.98456	2857.13	5482.21	5205.54	12757.1	10861.7	15453.7	11.4804	12.4205	12.3458	13.639	13.407	13.9157	+	EtOH_Cnrtl	Cluster -224	anatomical structure morphogenesis;biological regulation;cell migration;cell motility;cell projection morphogenesis;cell projection organization;cellular anatomical entity morphogenesis;cellular component organization;cellular component organization or biogenesis;cellular process;dendrite morphogenesis;developmental process;neuron projection morphogenesis;plasma membrane bounded cell projection m…	binding;identical protein binding;PDZ domain binding;protein binding;protein domain specific binding	cell surface;cellular anatomical entity;collagen-containing extracellular matrix;endoplasmic reticulum lumen;external encapsulating structure;extracellular matrix;Golgi lumen;intracellular organelle lumen;lysosomal lumen;membrane;membrane-enclosed lumen;organelle lumen;plasma membrane;vacuolar lumen	Cell adhesion molecules (CAMs);ECM-receptor interaction;Malaria	2	1.7022	1.57164	4.68253	P34741	P34741	SDC2_HUMAN	SDC2	SDC2	Syndecan-2			5205.54	1	12757.1	10861.7	15453.7	3	SDC2
Q9Y4G8	Q9Y4G8	RPGF2_HUMAN	RAPGEF2	RAPGEF2	Rap guanine nucleotide exchange factor 2	1.4028	0.0198532	0.493045	1.34372	5175.85	4120.87	4479.26	6881.02	6297.93	6145.97	12.3376	12.0087	12.129	12.7484	12.6207	12.5854	+	EtOH_Cnrtl	Cluster -224	adenylate cyclase-activating adrenergic receptor signaling pathway;adenylate cyclase-activating G protein-coupled receptor signaling pathway;adenylate cyclase-modulating G protein-coupled receptor signaling pathway;adrenergic receptor signaling pathway;anatomical structure development;biological regulation;blood vessel development;brain-derived neurotrophic factor receptor signaling pathway;cAMP-…	adenyl nucleotide binding;adenyl ribonucleotide binding;adrenergic receptor binding;anion binding;beta-1 adrenergic receptor binding;binding;calcium ion binding;cAMP binding;carbohydrate derivative binding;cation binding;cyclic nucleotide binding;diacylglycerol binding;enzyme activator activity;enzyme regulator activity;G protein-coupled receptor binding;GTPase activator activity;GTPase regulator…	anchoring junction;apical plasma membrane;bicellular tight junction;cell body;cell junction;cell projection;cell-cell junction;cellular anatomical entity;cytoplasm;cytoplasmic vesicle;cytosol;endocytic vesicle;endosome;intracellular membrane-bounded organelle;intracellular organelle;intracellular vesicle;late endosome;membrane;membrane-bounded organelle;neuron projection;neuronal cell body;organe…	MAPK signaling pathway	0	1.70217	0.493045	4.56227	Q9Y4G8	Q9Y4G8	RPGF2_HUMAN	RAPGEF2	RAPGEF2	Rap guanine nucleotide exchange factor 2	5175.85	4120.87	4479.26	3	6881.02	6297.93	6145.97	3	RAPGEF2
Q7L3B6	Q7L3B6	CD37L_HUMAN	CDC37L1	CDC37L1	Hsp90 co-chaperone Cdc37-like 1	0.856672	0.0199711	-0.223744	1.07583	23430.8	25276.7	25165.9	21588.3	21901.3	19795.7	14.5161	14.6255	14.6192	14.398	14.4187	14.2729	+	EtOH_Cnrtl	Cluster -223	biological regulation;cellular process;protein folding;protein stabilization;regulation of biological quality;regulation of protein stability	binding;heat shock protein binding;protein binding;protein-folding chaperone binding;unfolded protein binding	cellular anatomical entity;cytoplasm;cytoplasmic vesicle lumen;cytosol;extracellular region;intracellular organelle lumen;membrane-enclosed lumen;organelle lumen;platelet dense granule lumen;secretory granule lumen;vesicle lumen		0	1.6996	-0.223744	-3.87636	Q7L3B6	Q7L3B6	CD37L_HUMAN	CDC37L1	CDC37L1	Hsp90 co-chaperone Cdc37-like 1	23430.8	25276.7	25165.9	3	21588.3	21901.3	19795.7	3	CDC37L1
Q13277;Q13277-2;Q13277-3	Q13277	STX3_HUMAN	STX3	STX3	Syntaxin-3	1.11676	0.0202523	0.159742	0.21864	114014	105592	108126	120248	125646	120103	16.7989	16.6881	16.7224	16.8757	16.939	16.8739	+	EtOH_Cnrtl	Cluster -224	biological regulation;cell projection organization;cellular component organization;cellular component organization or biogenesis;cellular localization;cellular macromolecule localization;cellular process;establishment of localization;establishment of localization in cell;establishment of protein localization;exocytic insertion of neurotransmitter receptor to postsynaptic membrane;exocytic process…	anion binding;arachidonic acid binding;binding;carboxylic acid binding;fatty acid binding;icosanoid binding;icosatetraenoic acid binding;ion binding;lipid binding;long-chain fatty acid binding;molecular adaptor activity;monocarboxylic acid binding;organic acid binding;protein binding;protein-macromolecule adaptor activity;small molecule binding;SNAP receptor activity;SNARE binding	anchoring junction;apical plasma membrane;azurophil granule;bounding membrane of organelle;cell junction;cell projection;cell-cell junction;cellular anatomical entity;cytoplasmic vesicle;cytoplasmic vesicle membrane;dendrite;endomembrane system;exocytic vesicle;extracellular exosome;extracellular membrane-bounded organelle;extracellular organelle;extracellular vesicle;glutamatergic synapse;growth…	SNARE interactions in vesicular transport	0	1.69352	0.159742	4.08445	Q13277;Q13277-2;Q13277-3	Q13277	STX3_HUMAN	STX3	STX3	Syntaxin-3	114014	105592	108126	3	120248	125646	120103	3	STX3
Q9NZW5	Q9NZW5	PALS2_HUMAN	PALS2	PALS2	Protein PALS2	1.28464	0.0205702	0.363864	0.907664	8518.39	9753.78	9749.9	11697.5	11933.9	12366.8	13.0564	13.2517	13.2512	13.5139	13.5428	13.5942	+	EtOH_Cnrtl	Cluster -224	cellular component assembly;cellular component organization;cellular component organization or biogenesis;cellular process;protein-containing complex assembly;protein-containing complex organization		anchoring junction;cell junction;cell-cell junction;cellular anatomical entity;extracellular exosome;extracellular membrane-bounded organelle;extracellular organelle;extracellular vesicle;membrane;membrane-bounded organelle;organelle;plasma membrane;vesicle		0	1.68676	0.363864	5.26279	Q9NZW5	Q9NZW5	PALS2_HUMAN	PALS2	PALS2	Protein PALS2	8518.39	9753.78	9749.9	3	11697.5	11933.9	12366.8	3	PALS2
Q86YB8	Q86YB8	ERO1B_HUMAN	ERO1B	ERO1B	ERO1-like protein beta	1.32723	0.0208089	0.409687	1.06234	7129.54	5985.83	7101.15	8128.39	9595.4	9108.16	12.7996	12.5473	12.7938	12.9888	13.2281	13.1529	+	EtOH_Cnrtl	Cluster -224	amide metabolic process;biological regulation;cellular process;hormone metabolic process;insulin metabolic process;insulin processing;macromolecule metabolic process;metabolic process;nitrogen compound metabolic process;organic substance metabolic process;organonitrogen compound metabolic process;peptide hormone processing;peptide metabolic process;primary metabolic process;protein folding;protei…	anion binding;binding;catalytic activity;catalytic activity, acting on a protein;disulfide oxidoreductase activity;FAD binding;flavin adenine dinucleotide binding;heterocyclic compound binding;ion binding;nucleoside phosphate binding;nucleotide binding;organic cyclic compound binding;oxidoreductase activity;oxidoreductase activity, acting on a sulfur group of donors;oxidoreductase activity, actin…	cellular anatomical entity;endoplasmic reticulum;endoplasmic reticulum lumen;endoplasmic reticulum membrane;intracellular membrane-bounded organelle;intracellular organelle;intracellular organelle lumen;membrane;membrane-bounded organelle;membrane-enclosed lumen;organelle;organelle lumen;organelle membrane	Protein processing in endoplasmic reticulum	0	1.68175	0.409687	3.75437	Q86YB8	Q86YB8	ERO1B_HUMAN	ERO1B	ERO1B	ERO1-like protein beta	7129.54	5985.83	7101.15	3	8128.39	9595.4	9108.16	3	ERO1B
Q5JWF2-2;P63092-2	Q5JWF2-2	GNAS1_HUMAN;GNAS2_HUMAN	GNAS	GNAS	Isoform Gnas-2 of Guanine nucleotide-binding protein G(s) subunit alpha isoforms short	0.718976	0.0209063	-0.474419	1.922	29734.9	26734.3	33651.8	19642.5	23943.4	21208.9	14.8599	14.7064	15.0384	14.2617	14.5473	14.3724	+	EtOH_Cnrtl	Cluster -223	activation of adenylate cyclase activity;adenylate cyclase-activating adrenergic receptor signaling pathway;adenylate cyclase-activating dopamine receptor signaling pathway;adenylate cyclase-activating G protein-coupled receptor signaling pathway;adenylate cyclase-modulating G protein-coupled receptor signaling pathway;adrenergic receptor signaling pathway;anatomical structure development;anatomi…	adenylate cyclase activator activity;adenylate cyclase regulator activity;adrenergic receptor binding;anion binding;beta-2 adrenergic receptor binding;binding;carbohydrate derivative binding;catalytic activity;cation binding;corticotropin-releasing hormone receptor 1 binding;corticotropin-releasing hormone receptor binding;cyclase activator activity;cyclase regulator activity;D1 dopamine receptor…	apical plasma membrane;catalytic complex;cellular anatomical entity;cytoplasm;cytosol;extracellular exosome;extracellular membrane-bounded organelle;extracellular organelle;extracellular vesicle;GTPase complex;heterotrimeric G-protein complex;membrane;membrane protein complex;membrane-bounded organelle;organelle;organelle membrane;plasma membrane;plasma membrane protein complex;plasma membrane re…	Amoebiasis;Bile secretion;Calcium signaling pathway;Chagas disease (American trypanosomiasis);Dilated cardiomyopathy;Endocrine and other factor-regulated calcium reabsorption;Gap junction;Gastric acid secretion;GnRH signaling pathway;Long-term depression;Melanogenesis;Pancreatic secretion;Salivary secretion;Taste transduction;Vascular smooth muscle contraction;Vasopressin-regulated water reabsorp…	0	1.67972	-0.474419	-3.73701	Q5JWF2-2;P63092-2	Q5JWF2-2	GNAS1_HUMAN;GNAS2_HUMAN	GNAS	GNAS	Isoform Gnas-2 of Guanine nucleotide-binding protein G(s) subunit alpha isoforms short	29734.9	26734.3	33651.8	3	19642.5	23943.4	21208.9	3	GNAS
O75937	O75937	DNJC8_HUMAN	DNAJC8	DNAJC8	DnaJ homolog subfamily C member 8	0.764178	0.0209741	-0.385493	1.62182	489898	408686	423396	334390	359474	316364	18.9021	18.6406	18.6916	18.3512	18.4555	18.2712	+	EtOH_Cnrtl	Cluster -223		binding;heat shock protein binding;Hsp70 protein binding;protein binding;protein-folding chaperone binding	cellular anatomical entity;cytosol;intercellular bridge;intracellular membrane-bounded organelle;intracellular organelle;membrane-bounded organelle;nucleoplasm;nucleus;organelle		0	1.67832	-0.385493	-4.00782	O75937	O75937	DNJC8_HUMAN	DNAJC8	DNAJC8	DnaJ homolog subfamily C member 8	489898	408686	423396	3	334390	359474	316364	3	DNAJC8
Q99807	Q99807	COQ7_HUMAN	COQ7	COQ7	5-demethoxyubiquinone hydroxylase, mitochondrial	1.37274	0.0210308	0.454593	1.21393	11324.2	10560.7	12534.6	16343.8	13798.6	17106.5	13.4671	13.3664	13.6136	13.9965	13.7522	14.0623	+	EtOH_Cnrtl	Cluster -224	biological regulation;biosynthetic process;cellular biosynthetic process;cellular ketone metabolic process;cellular metabolic process;cellular process;determination of adult lifespan;ketone biosynthetic process;metabolic process;multicellular organismal process;negative regulation of biological process;negative regulation of biosynthetic process;negative regulation of cellular biosynthetic proces…	3-demethoxyubiquinol 3-hydroxylase activity;binding;catalytic activity;cation binding;chromatin binding;ion binding;metal ion binding;monooxygenase activity;oxidoreductase activity;oxidoreductase activity, acting on paired donors, with incorporation or reduction of molecular oxygen;oxidoreductase activity, acting on paired donors, with incorporation or reduction of molecular oxygen, NAD(P)H as on…	cellular anatomical entity;chromosome;extrinsic component of membrane;extrinsic component of mitochondrial inner membrane;extrinsic component of organelle membrane;intracellular membrane-bounded organelle;intracellular non-membrane-bounded organelle;intracellular organelle;membrane;membrane-bounded organelle;mitochondrial inner membrane;mitochondrial membrane;mitochondrion;non-membrane-bounded or…	Ubiquinone and other terpenoid-quinone biosynthesis	0	1.67714	0.454593	3.83588	Q99807	Q99807	COQ7_HUMAN	COQ7	COQ7	5-demethoxyubiquinone hydroxylase, mitochondrial	11324.2	10560.7	12534.6	3	16343.8	13798.6	17106.5	3	COQ7
Q13433	Q13433	S39A6_HUMAN	SLC39A6	SLC39A6	Zinc transporter ZIP6	1.08044	0.0211059	0.111566	0.0560195	16874.9	17715.5	17224.6	18152.8	18682.2	19148.1	14.0426	14.1127	14.0722	14.1479	14.1894	14.2249	+	EtOH_Cnrtl	Cluster -224	activation of immune response;antigen receptor-mediated signaling pathway;biological regulation;cell activation;cell differentiation;cell surface receptor signaling pathway;cellular developmental process;cellular homeostasis;cellular process;chemical homeostasis;developmental process;epithelial to mesenchymal transition;establishment of localization;homeostatic process;immune response-activating …	active monoatomic ion transmembrane transporter activity;active transmembrane transporter activity;bicarbonate transmembrane transporter activity;inorganic cation transmembrane transporter activity;inorganic molecular entity transmembrane transporter activity;metal ion transmembrane transporter activity;monoatomic cation transmembrane transporter activity;monoatomic cation:bicarbonate symporter a…	apical plasma membrane;cell projection membrane;cell surface;cellular anatomical entity;endoplasmic reticulum;intracellular membrane-bounded organelle;intracellular organelle;lamellipodium membrane;leading edge membrane;membrane;membrane microdomain;membrane raft;membrane-bounded organelle;organelle;plasma membrane;plasma membrane region		0	1.6756	0.111566	3.70162	Q13433	Q13433	S39A6_HUMAN	SLC39A6	SLC39A6	Zinc transporter ZIP6	16874.9	17715.5	17224.6	3	18152.8	18682.2	19148.1	3	SLC39A6
Q9NZE8	Q9NZE8	RM35_HUMAN	MRPL35	MRPL35	Large ribosomal subunit protein bL35m	1.31909	0.02114	0.398235	1.02369	10110.1	9813.31	11440.1	14575.7	12275.7	14520	13.3035	13.2605	13.4818	13.8313	13.5835	13.8258	+	EtOH_Cnrtl	Cluster -224	amide biosynthetic process;amide metabolic process;biosynthetic process;cellular biosynthetic process;cellular metabolic process;cellular nitrogen compound biosynthetic process;cellular nitrogen compound metabolic process;cellular process;macromolecule biosynthetic process;macromolecule metabolic process;metabolic process;mitochondrial translation;nitrogen compound metabolic process;organic subst…	structural constituent of ribosome;structural molecule activity	cellular anatomical entity;intracellular membrane-bounded organelle;intracellular non-membrane-bounded organelle;intracellular organelle;large ribosomal subunit;membrane;membrane-bounded organelle;mitochondrial inner membrane;mitochondrial large ribosomal subunit;mitochondrial membrane;mitochondrial protein-containing complex;mitochondrial ribosome;mitochondrion;non-membrane-bounded organelle;org…		0	1.67489	0.398235	3.75273	Q9NZE8	Q9NZE8	RM35_HUMAN	MRPL35	MRPL35	Large ribosomal subunit protein bL35m	10110.1	9813.31	11440.1	3	14575.7	12275.7	14520	3	MRPL35
Q9BYJ9	Q9BYJ9	YTHD1_HUMAN	YTHDF1	YTHDF1	YTH domain-containing family protein 1	1.17731	0.0213337	0.234431	0.470758	13744.8	14177	13261.2	16239.9	15196.4	17048.8	13.7466	13.7913	13.6949	13.9873	13.8914	14.0574	+	EtOH_Cnrtl	Cluster -224	behavior;biological regulation;cellular component assembly;cellular component organization;cellular component organization or biogenesis;cellular process;cognition;immune system process;learning;learning or memory;memory;modulation of chemical synaptic transmission;mRNA destabilization;multicellular organismal process;nervous system process;non-membrane-bounded organelle assembly;organelle assemb…	binding;molecular adaptor activity;mRNA binding;N6-methyladenosine-containing RNA reader activity;nucleic acid binding;organic cyclic compound binding;protein-containing complex binding;protein-macromolecule adaptor activity;protein-RNA adaptor activity;ribonucleoprotein complex binding;ribosome binding;RNA binding	cellular anatomical entity;cytoplasm;cytoplasmic ribonucleoprotein granule;cytoplasmic stress granule;intracellular non-membrane-bounded organelle;intracellular organelle;non-membrane-bounded organelle;organelle;P-body;ribonucleoprotein granule;supramolecular complex		0	1.67093	0.234431	4.21879	Q9BYJ9	Q9BYJ9	YTHD1_HUMAN	YTHDF1	YTHDF1	YTH domain-containing family protein 1	13744.8	14177	13261.2	3	16239.9	15196.4	17048.8	3	YTHDF1
Q69YH5	Q69YH5	CDCA2_HUMAN	CDCA2	CDCA2	Cell division cycle-associated protein 2	1.25957	0.0214999	0.330816	0.796109	4377.5	4796.97	4544.47	6122.47	5914.13	5243.43	12.0959	12.2279	12.1499	12.5799	12.53	12.3563	+	EtOH_Cnrtl	Cluster -224	biological regulation;cell cycle process;cell division;cellular process;chromosome segregation;positive regulation of biological process;positive regulation of cellular metabolic process;positive regulation of cellular process;positive regulation of dephosphorylation;positive regulation of macromolecule metabolic process;positive regulation of metabolic process;positive regulation of nitrogen com…		cellular anatomical entity;chromosome;cytosol;intracellular membrane-bounded organelle;intracellular non-membrane-bounded organelle;intracellular organelle;membrane-bounded organelle;non-membrane-bounded organelle;nucleoplasm;nucleus;organelle		0	1.66756	0.330816	4.24963	Q69YH5	Q69YH5	CDCA2_HUMAN	CDCA2	CDCA2	Cell division cycle-associated protein 2	4377.5	4796.97	4544.47	3	6122.47	5914.13	5243.43	3	CDCA2
O75558	O75558	STX11_HUMAN	STX11	STX11	Syntaxin-11	1.15838	0.0215781	0.212891	0.398047	39696.9	40426.1	36566.5	46039.1	45855.8	43275.3	15.2767	15.303	15.1582	15.4906	15.4848	15.4013	+	EtOH_Cnrtl	Cluster -224	cellular component organization;cellular component organization or biogenesis;cellular localization;cellular macromolecule localization;cellular process;establishment of localization;establishment of localization in cell;establishment of protein localization;exocytic process;exocytosis;export from cell;intracellular protein transport;intracellular transport;localization;macromolecule localization…	binding;molecular adaptor activity;protein binding;protein-macromolecule adaptor activity;SNAP receptor activity;SNARE binding	cellular anatomical entity;cytoplasmic vesicle;endomembrane system;exocytic vesicle;Golgi apparatus;intracellular membrane-bounded organelle;intracellular organelle;intracellular vesicle;membrane;membrane protein complex;membrane-bounded organelle;organelle;plasma membrane;plasma membrane region;presynaptic active zone membrane;protein-containing complex;secretory vesicle;SNARE complex;synaptic m…	SNARE interactions in vesicular transport	0	1.66599	0.212891	4.01203	O75558	O75558	STX11_HUMAN	STX11	STX11	Syntaxin-11	39696.9	40426.1	36566.5	3	46039.1	45855.8	43275.3	3	STX11
A1A4S6	A1A4S6	RHG10_HUMAN	ARHGAP10	ARHGAP10	Rho GTPase-activating protein 10	1.19072	0.0217932	0.251126	0.527113	15616.4	15062.6	14136.9	17189.8	19098.9	17074.4	13.9308	13.8787	13.7872	14.0693	14.2212	14.0595	+	EtOH_Cnrtl	Cluster -224	biological regulation;cellular component organization;cellular component organization or biogenesis;cellular process;cytoskeleton organization;negative regulation of apoptotic process;negative regulation of biological process;negative regulation of cellular process;negative regulation of programmed cell death;organelle organization;regulation of apoptotic process;regulation of biological process;…	enzyme activator activity;enzyme regulator activity;GTPase activator activity;GTPase regulator activity;molecular function activator activity;molecular function regulator activity;nucleoside-triphosphatase regulator activity	cellular anatomical entity;cytosol;membrane;perinuclear region of cytoplasm;plasma membrane	Bacterial invasion of epithelial cells	0	1.66168	0.251126	3.74315	A1A4S6	A1A4S6	RHG10_HUMAN	ARHGAP10	ARHGAP10	Rho GTPase-activating protein 10	15616.4	15062.6	14136.9	3	17189.8	19098.9	17074.4	3	ARHGAP10
O14965	O14965	AURKA_HUMAN	AURKA	AURKA	Aurora kinase A	0.713425	0.0221475	-0.490851	1.97746	12177.3	12636.8	14452.9	8551.17	8741.3	10721.6	13.5719	13.6253	13.8191	13.0619	13.0936	13.3882	+	EtOH_Cnrtl	Cluster -223	anatomical structure development;animal organ development;animal organ regeneration;anterior/posterior axis specification;apoptotic process;axis specification;biological regulation;catabolic process;cell cycle;cell cycle G2/M phase transition;cell cycle phase transition;cell cycle process;cell death;cell division;cell growth;cell projection organization;cellular component assembly;cellular compon…	adenyl nucleotide binding;adenyl ribonucleotide binding;anion binding;ATP binding;binding;carbohydrate derivative binding;catalytic activity;catalytic activity, acting on a protein;enzyme binding;heterocyclic compound binding;histone H3 kinase activity;histone H3S10 kinase activity;histone kinase activity;histone modifying activity;ion binding;kinase activity;kinase binding;molecular function act…	axon hillock;basolateral plasma membrane;cell junction;cellular anatomical entity;centriole;centrosome;chromosome passenger complex;ciliary basal body;cytoskeleton;cytosol;female germ cell nucleus;germ cell nucleus;germinal vesicle;glutamatergic synapse;intracellular membrane-bounded organelle;intracellular non-membrane-bounded organelle;intracellular organelle;kinetochore;meiotic spindle;membran…	Oocyte meiosis	0	1.65467	-0.490851	-3.82926	O14965	O14965	AURKA_HUMAN	AURKA	AURKA	Aurora kinase A	12177.3	12636.8	14452.9	3	8551.17	8741.3	10721.6	3	AURKA
Q9UNP9;Q9UNP9-2;Q9UNP9-3	Q9UNP9	PPIE_HUMAN	PPIE	PPIE	Peptidyl-prolyl cis-trans isomerase E	1.42226	0.0222417	0.513582	1.41305	57947.7	53449	45295.3	71874.1	79957.7	71024.3	15.8225	15.7059	15.4671	16.1332	16.2869	16.116	+	EtOH_Cnrtl	Cluster -224	biological regulation;cellular aromatic compound metabolic process;cellular metabolic process;cellular nitrogen compound metabolic process;cellular process;heterocycle metabolic process;macromolecule metabolic process;macromolecule modification;metabolic process;mRNA metabolic process;mRNA processing;mRNA splicing, via spliceosome;nitrogen compound metabolic process;nucleic acid metabolic process…	amide binding;binding;catalytic activity;catalytic activity, acting on a protein;cis-trans isomerase activity;cyclosporin A binding;isomerase activity;mRNA binding;nucleic acid binding;organic cyclic compound binding;peptide binding;peptidyl-prolyl cis-trans isomerase activity;poly-purine tract binding;poly(A) binding;RNA binding;single-stranded RNA binding	catalytic complex;catalytic step 2 spliceosome;cellular anatomical entity;cytoplasm;cytoplasmic vesicle lumen;cytosol;extracellular region;ficolin-1-rich granule lumen;intracellular membrane-bounded organelle;intracellular organelle;intracellular organelle lumen;membrane-bounded organelle;membrane-enclosed lumen;nuclear body;nuclear protein-containing complex;nuclear speck;nucleoplasm;nucleus;org…	Spliceosome	0	1.65283	0.513582	4.35724	Q9UNP9;Q9UNP9-2;Q9UNP9-3	Q9UNP9	PPIE_HUMAN	PPIE	PPIE	Peptidyl-prolyl cis-trans isomerase E	57947.7	53449	45295.3	3	71874.1	79957.7	71024.3	3	PPIE
P42773	P42773	CDN2C_HUMAN	CDKN2C	CDKN2C	Cyclin-dependent kinase 4 inhibitor C	0.828226	0.0222688	-0.273468	1.24368	29436.4	31055.9	29898.7	25808.5	25902.8	23152.9	14.8453	14.9226	14.8678	14.6556	14.6608	14.4989	+	EtOH_Cnrtl	Cluster -223	biological regulation;cell cycle;cell differentiation;cell population proliferation;cellular developmental process;cellular process;developmental process;glial cell differentiation;negative regulation of biological process;negative regulation of cell growth;negative regulation of cell population proliferation;negative regulation of cellular metabolic process;negative regulation of cellular proces…	binding;cyclin-dependent protein serine/threonine kinase inhibitor activity;cyclin-dependent protein serine/threonine kinase regulator activity;enzyme binding;enzyme inhibitor activity;enzyme regulator activity;kinase binding;kinase inhibitor activity;kinase regulator activity;molecular function inhibitor activity;molecular function regulator activity;protein binding;protein kinase binding;protei…	cellular anatomical entity;cytoplasm;cytosol;intracellular membrane-bounded organelle;intracellular organelle;membrane-bounded organelle;nucleus;organelle	Cell cycle	0	1.6523	-0.273468	-4.72634	P42773	P42773	CDN2C_HUMAN	CDKN2C	CDKN2C	Cyclin-dependent kinase 4 inhibitor C	29436.4	31055.9	29898.7	3	25808.5	25902.8	23152.9	3	CDKN2C
Q9H3G5	Q9H3G5	CPVL_HUMAN	CPVL	CPVL	Probable serine carboxypeptidase CPVL	1.14959	0.0222852	0.200265	0.355429	878801	925174	910050	1.01e+06	1.1e+06	1.01e+06	19.7452	19.8194	19.7956	19.9459	20.0691	19.9459	+	EtOH_Cnrtl	Cluster -224	macromolecule metabolic process;metabolic process;nitrogen compound metabolic process;organic substance metabolic process;organonitrogen compound metabolic process;primary metabolic process;protein metabolic process;proteolysis	carboxypeptidase activity;catalytic activity;catalytic activity, acting on a protein;exopeptidase activity;hydrolase activity;peptidase activity;serine hydrolase activity;serine-type carboxypeptidase activity;serine-type exopeptidase activity;serine-type peptidase activity	cellular anatomical entity;extracellular exosome;extracellular membrane-bounded organelle;extracellular organelle;extracellular vesicle;membrane-bounded organelle;organelle;vesicle		0	1.65198	0.200265	4.30563	Q9H3G5	Q9H3G5	CPVL_HUMAN	CPVL	CPVL	Probable serine carboxypeptidase CPVL	878801	925174	910049	3	1010000	1100000	1010000	3	CPVL
P54886;P54886-2	P54886	P5CS_HUMAN	ALDH18A1	ALDH18A1	Delta-1-pyrroline-5-carboxylate synthase	1.0903	0.0223667	0.125014	0.101415	108727	103562	109895	119222	114664	117390	16.7304	16.6601	16.7458	16.8633	16.8071	16.841	+	EtOH_Cnrtl	Cluster -224	alpha-amino acid biosynthetic process;alpha-amino acid metabolic process;amide metabolic process;amino acid biosynthetic process;amino acid metabolic process;biosynthetic process;carboxylic acid biosynthetic process;carboxylic acid metabolic process;cellular biosynthetic process;cellular metabolic process;cellular process;citrulline biosynthetic process;citrulline metabolic process;dicarboxylic a…	adenyl nucleotide binding;adenyl ribonucleotide binding;amino acid kinase activity;anion binding;ATP binding;binding;carbohydrate derivative binding;catalytic activity;glutamate 5-kinase activity;glutamate-5-semialdehyde dehydrogenase activity;heterocyclic compound binding;identical protein binding;ion binding;kinase activity;nucleic acid binding;nucleoside phosphate binding;nucleotide binding;or…	cellular anatomical entity;intracellular membrane-bounded organelle;intracellular organelle;membrane;membrane-bounded organelle;mitochondrial inner membrane;mitochondrial membrane;mitochondrion;organelle;organelle inner membrane;organelle membrane	Arginine and proline metabolism	0	1.6504	0.125014	4.03117	P54886;P54886-2	P54886	P5CS_HUMAN	ALDH18A1	ALDH18A1	Delta-1-pyrroline-5-carboxylate synthase	108727	103562	109895	3	119222	114664	117390	3	ALDH18A1
O95544	O95544	NADK_HUMAN	NADK	NADK	NAD kinase	1.14589	0.0230872	0.195724	0.3401	91059.6	85578.1	88054.3	106727	99818.8	96762.9	16.4745	16.385	16.4261	16.7036	16.607	16.5622	+	EtOH_Cnrtl	Cluster -224	aromatic compound biosynthetic process;ATP metabolic process;biological regulation;biosynthetic process;carbohydrate derivative metabolic process;cellular aromatic compound metabolic process;cellular biosynthetic process;cellular metabolic process;cellular nitrogen compound biosynthetic process;cellular nitrogen compound metabolic process;cellular process;heterocycle biosynthetic process;heterocy…	adenyl nucleotide binding;adenyl ribonucleotide binding;anion binding;ATP binding;binding;carbohydrate derivative binding;catalytic activity;cation binding;heterocyclic compound binding;ion binding;kinase activity;metal ion binding;NAD+ kinase activity;nucleoside phosphate binding;nucleotide binding;organic cyclic compound binding;phosphotransferase activity, alcohol group as acceptor;purine nucl…	cellular anatomical entity;cytosol	Nicotinate and nicotinamide metabolism	0	1.63663	0.195724	3.98659	O95544	O95544	NADK_HUMAN	NADK	NADK	NAD kinase	91059.6	85578.1	88054.3	3	106727	99818.7	96762.9	3	NADK
O43505	O43505	B4GA1_HUMAN	B4GAT1	B4GAT1	Beta-1,4-glucuronyltransferase 1	1.73147	0.0236242	0.805561	2.39863	4363.33	4662.5	3200.91	6942.26	6390.08	7837.85	12.0912	12.1869	11.6443	12.7612	12.6416	12.9362	+	EtOH_Cnrtl	Cluster -224	aminoglycan biosynthetic process;aminoglycan metabolic process;axon guidance;biosynthetic process;carbohydrate derivative biosynthetic process;carbohydrate derivative metabolic process;cell projection organization;cellular biosynthetic process;cellular component organization;cellular component organization or biogenesis;cellular metabolic process;cellular process;glycosaminoglycan biosynthetic pr…	acetylglucosaminyltransferase activity;binding;catalytic activity;cation binding;glucuronosyltransferase activity;glycosyltransferase activity;hexosyltransferase activity;ion binding;metal ion binding;N-acetyllactosaminide beta-1,3-N-acetylglucosaminyltransferase activity;transferase activity;UDP-glycosyltransferase activity	bounding membrane of organelle;cellular anatomical entity;extracellular exosome;extracellular membrane-bounded organelle;extracellular organelle;extracellular vesicle;Golgi apparatus;Golgi membrane;intracellular membrane-bounded organelle;intracellular organelle;membrane;membrane-bounded organelle;organelle;organelle membrane;vesicle	Glycosaminoglycan biosynthesis - keratan sulfate;Glycosphingolipid biosynthesis - lacto and neolacto series	0	1.62664	0.805561	4.28859	O43505	O43505	B4GA1_HUMAN	B4GAT1	B4GAT1	Beta-1,4-glucuronyltransferase 1	4363.33	4662.5	3200.91	3	6942.26	6390.08	7837.85	3	B4GAT1
Q6UWZ7;Q6UWZ7-2	Q6UWZ7	ABRX1_HUMAN	ABRAXAS1	ABRAXAS1	BRCA1-A complex subunit Abraxas 1	4.68514	0.0238053	2.32141	7.51544	2955.58	2298.63	1196.39	9127.99	10315.6	10778.4	11.5292	11.1666	10.2245	13.1561	13.3325	13.3959	+	EtOH_Cnrtl	Cluster -224	attachment of spindle microtubules to kinetochore;biological regulation;cell cycle checkpoint signaling;cell cycle process;cellular aromatic compound metabolic process;cellular component assembly;cellular component organization;cellular component organization or biogenesis;cellular metabolic process;cellular nitrogen compound metabolic process;cellular process;cellular response to stimulus;cellul…	binding;cytoskeletal protein binding;microtubule binding;modification-dependent protein binding;polyubiquitin modification-dependent protein binding;protein binding;tubulin binding	BRCA1-A complex;cellular anatomical entity;intracellular membrane-bounded organelle;intracellular organelle;membrane-bounded organelle;nuclear body;nuclear protein-containing complex;nucleoplasm;nucleus;organelle;protein-containing complex		3	1.62333	2.32141	5.87112	Q6UWZ7;Q6UWZ7-2	Q6UWZ7	ABRX1_HUMAN	ABRAXAS1	ABRAXAS1	BRCA1-A complex subunit Abraxas 1				0	9127.99	10315.6	10778.4	3	ABRAXAS1
Q9UIG0;Q9UIG0-2	Q9UIG0	BAZ1B_HUMAN	BAZ1B	BAZ1B	Tyrosine-protein kinase BAZ1B	1.20127	0.0243348	0.263018	0.567254	43975.2	46980.9	44766.8	50575.4	54760.9	57703.8	15.4244	15.5198	15.4501	15.6261	15.7409	15.8164	+	EtOH_Cnrtl	Cluster -224	biological regulation;cellular component organization;cellular component organization or biogenesis;cellular metabolic process;cellular process;cellular response to stimulus;cellular response to stress;chromatin organization;chromatin remodeling;DNA damage response;macromolecule metabolic process;macromolecule modification;metabolic process;negative regulation of biological process;negative regul…	adenyl nucleotide binding;adenyl ribonucleotide binding;anion binding;ATP binding;binding;carbohydrate derivative binding;catalytic activity;catalytic activity, acting on a protein;cation binding;heterocyclic compound binding;histone binding;histone H2AX kinase activity;histone H2AXY142 kinase activity;histone kinase activity;histone modifying activity;ion binding;kinase activity;metal ion bindin…	ATPase complex;B-WICH complex;catalytic complex;cellular anatomical entity;chromatin;chromosome;condensed chromosome;heterochromatin;intracellular membrane-bounded organelle;intracellular non-membrane-bounded organelle;intracellular organelle;ISWI-type complex;membrane-bounded organelle;non-membrane-bounded organelle;nuclear protein-containing complex;nucleolus;nucleoplasm;nucleus;organelle;peric…		0	1.61377	0.263018	4.22794	Q9UIG0;Q9UIG0-2	Q9UIG0	BAZ1B_HUMAN	BAZ1B	BAZ1B	Tyrosine-protein kinase BAZ1B	43975.2	46980.9	44766.8	3	50575.4	54760.9	57703.8	3	BAZ1B
O60313-2	O60313-2	OPA1_HUMAN	OPA1	OPA1	Isoform 2 of Dynamin-like GTPase OPA1, mitochondrial	1.13587	0.0243716	0.184206	0.301221	205562	212347	193237	232919	222035	239225	17.6492	17.6961	17.56	17.8295	17.7604	17.868	+	EtOH_Cnrtl	Cluster -224	anatomical structure formation involved in morphogenesis;apoptotic process;axo-dendritic transport;axonal transport;axonal transport of mitochondrion;biological regulation;carbohydrate derivative metabolic process;cell death;cellular aromatic compound metabolic process;cellular component assembly;cellular component organization;cellular component organization or biogenesis;cellular localization;c…	anion binding;binding;carbohydrate derivative binding;cardiolipin binding;catalytic activity;cation binding;cytoskeletal protein binding;GTP binding;GTPase activity;guanyl nucleotide binding;guanyl ribonucleotide binding;heterocyclic compound binding;hydrolase activity;hydrolase activity, acting on acid anhydrides;hydrolase activity, acting on acid anhydrides, in phosphorus-containing anhydrides;…	axon cytoplasm;bounding membrane of organelle;cell projection;cellular anatomical entity;cytoplasm;cytoplasmic region;cytosol;dendrite;intracellular membrane-bounded organelle;intracellular organelle;intracellular organelle lumen;membrane;membrane-bounded organelle;membrane-enclosed lumen;microtubule;mitochondrial crista;mitochondrial inner membrane;mitochondrial intermembrane space;mitochondrial…		0	1.61312	0.184206	3.62466	O60313-2	O60313-2	OPA1_HUMAN	OPA1	OPA1	Isoform 2 of Dynamin-like GTPase OPA1, mitochondrial	205562	212347	193237	3	232919	222035	239225	3	OPA1
O94916;O94916-2;O94916-5	O94916	NFAT5_HUMAN	NFAT5	NFAT5	Nuclear factor of activated T-cells 5	0.736915	0.0244411	-0.443718	1.81837	14489	13099.3	12279.2	9297.81	8949.46	11131.7	13.8227	13.6772	13.5839	13.1827	13.1276	13.4424	+	EtOH_Cnrtl	Cluster -223	aromatic compound biosynthetic process;biological regulation;biosynthetic process;calcineurin-mediated signaling;calcineurin-NFAT signaling cascade;calcium-mediated signaling;cellular aromatic compound metabolic process;cellular biosynthetic process;cellular component organization;cellular component organization or biogenesis;cellular hyperosmotic response;cellular metabolic process;cellular nitr…	binding;chromatin binding;cis-regulatory region sequence-specific DNA binding;DNA binding;DNA-binding transcription activator activity;DNA-binding transcription activator activity, RNA polymerase II-specific;DNA-binding transcription factor activity;DNA-binding transcription factor activity, RNA polymerase II-specific;double-stranded DNA binding;nucleic acid binding;organic cyclic compound bindin…	cellular anatomical entity;chromatin;cytosol;intracellular membrane-bounded organelle;intracellular organelle;membrane-bounded organelle;nucleoplasm;nucleus;organelle;protein-containing complex;protein-DNA complex;transcription regulator complex	Axon guidance;B cell receptor signaling pathway;Natural killer cell mediated cytotoxicity;T cell receptor signaling pathway;VEGF signaling pathway;Wnt signaling pathway	0	1.61188	-0.443718	-3.71747	O94916;O94916-2;O94916-5	O94916	NFAT5_HUMAN	NFAT5	NFAT5	Nuclear factor of activated T-cells 5	14489	13099.3	12279.2	3	9297.81	8949.46	11131.7	3	NFAT5
Q9UHD9	Q9UHD9	UBQL2_HUMAN	UBQLN2	UBQLN2	Ubiquilin-2	1.22928	0.0245526	0.295816	0.677964	302647	321255	313799	388275	409118	355303	18.2073	18.2934	18.2595	18.5667	18.6422	18.4387	+	EtOH_Cnrtl	Cluster -224	autophagosome assembly;autophagosome organization;biological regulation;catabolic process;cellular component assembly;cellular component organization;cellular component organization or biogenesis;cellular process;cellular response to stimulus;cellular response to stress;ERAD pathway;macromolecule catabolic process;macromolecule metabolic process;metabolic process;modification-dependent macromolec…	binding;identical protein binding;modification-dependent protein binding;molecular adaptor activity;molecular condensate scaffold activity;polyubiquitin modification-dependent protein binding;protein binding;protein-macromolecule adaptor activity	autophagosome;cellular anatomical entity;cytoplasm;cytoplasmic vesicle;cytosol;intracellular membrane-bounded organelle;intracellular organelle;intracellular vesicle;membrane;membrane-bounded organelle;nucleus;organelle;plasma membrane;vacuole;vesicle	Protein processing in endoplasmic reticulum	0	1.6099	0.295816	4.58999	Q9UHD9	Q9UHD9	UBQL2_HUMAN	UBQLN2	UBQLN2	Ubiquilin-2	302647	321255	313799	3	388275	409118	355303	3	UBQLN2
Q9H7B2	Q9H7B2	RPF2_HUMAN	RPF2	RPF2	Ribosome production factor 2 homolog	1.25422	0.024577	0.325992	0.779824	16806.3	17472.6	15164.8	19707.4	22691.2	19614.6	14.0367	14.0928	13.8884	14.2664	14.4698	14.2596	+	EtOH_Cnrtl	Cluster -224	biological regulation;cellular aromatic compound metabolic process;cellular component assembly;cellular component biogenesis;cellular component organization;cellular component organization or biogenesis;cellular localization;cellular macromolecule localization;cellular metabolic process;cellular nitrogen compound metabolic process;cellular process;heterocycle metabolic process;localization;macrom…	5S rRNA binding;binding;nucleic acid binding;organic cyclic compound binding;RNA binding;rRNA binding	cellular anatomical entity;chromosome;intracellular non-membrane-bounded organelle;intracellular organelle;non-membrane-bounded organelle;nucleolus;nucleoplasm;organelle		0	1.60947	0.325992	3.54167	Q9H7B2	Q9H7B2	RPF2_HUMAN	RPF2	RPF2	Ribosome production factor 2 homolog	16806.3	17472.6	15164.8	3	19707.4	22691.2	19614.6	3	RPF2
Q13243	Q13243	SRSF5_HUMAN	SRSF5	SRSF5	Serine/arginine-rich splicing factor 5	0.476976	0.0247586	-1.06834	3.92682	323356	541939	438848	158402	264899	198744	18.3028	19.0478	18.7434	17.2732	18.0151	17.6006	+	EtOH_Cnrtl	Cluster -223	cellular aromatic compound metabolic process;cellular component assembly;cellular component organization;cellular component organization or biogenesis;cellular metabolic process;cellular nitrogen compound metabolic process;cellular process;heterocycle metabolic process;macromolecule metabolic process;metabolic process;mRNA metabolic process;mRNA processing;mRNA splice site recognition;mRNA splici…	binding;nucleic acid binding;organic cyclic compound binding;RNA binding	cellular anatomical entity;cytosol;intracellular non-membrane-bounded organelle;intracellular organelle;non-membrane-bounded organelle;nuclear body;nuclear speck;nucleolus;nucleoplasm;organelle	Spliceosome	0	1.60627	-1.06834	-3.50622	Q13243	Q13243	SRSF5_HUMAN	SRSF5	SRSF5	Serine/arginine-rich splicing factor 5	323356	541939	438848	3	158402	264899	198744	3	SRSF5
P40937	P40937	RFC5_HUMAN	RFC5	RFC5	Replication factor C subunit 5	1.15618	0.0251225	0.209037	0.385037	45581.7	42775.5	46850.6	53170.6	48972.9	54181.6	15.4762	15.3845	15.5158	15.6983	15.5797	15.7255	+	EtOH_Cnrtl	Cluster -224	biological regulation;cellular aromatic compound metabolic process;cellular component organization;cellular component organization or biogenesis;cellular metabolic process;cellular nitrogen compound metabolic process;cellular process;cellular response to stimulus;cellular response to stress;chromosome organization;DNA conformation change;DNA damage response;DNA duplex unwinding;DNA geometric chan…	adenyl nucleotide binding;adenyl ribonucleotide binding;anion binding;ATP binding;ATP hydrolysis activity;binding;carbohydrate derivative binding;catalytic activity;DNA binding;enzyme binding;heterocyclic compound binding;hydrolase activity;hydrolase activity, acting on acid anhydrides;hydrolase activity, acting on acid anhydrides, in phosphorus-containing anhydrides;ion binding;nucleic acid bind…	cellular anatomical entity;Ctf18 RFC-like complex;DNA replication factor C complex;intracellular membrane-bounded organelle;intracellular organelle;membrane-bounded organelle;nuclear protein-containing complex;nucleoplasm;nucleus;organelle;protein-containing complex	DNA replication;Mismatch repair;Nucleotide excision repair	0	1.59994	0.209037	3.52536	P40937	P40937	RFC5_HUMAN	RFC5	RFC5	Replication factor C subunit 5	45581.7	42775.5	46850.6	3	53170.6	48972.9	54181.6	3	RFC5
Q02833;Q02833-2;Q02833-3	Q02833	RASF7_HUMAN	RASSF7	RASSF7	Ras association domain-containing protein 7	0.843131	0.0251409	-0.245564	1.14949	12988.8	12834.9	11563.4	10634.4	10983	9904.83	13.665	13.6478	13.4973	13.3765	13.423	13.2739	+	EtOH_Cnrtl	Cluster -223	apoptotic process;biological regulation;cell death;cellular process;programmed cell death;regulation of biological process;regulation of cellular process;signal transduction		cellular anatomical entity;centriolar satellite;cytoplasm		0	1.59962	-0.245564	-3.55322	Q02833;Q02833-2;Q02833-3	Q02833	RASF7_HUMAN	RASSF7	RASSF7	Ras association domain-containing protein 7	12988.8	12834.9	11563.4	3	10634.4	10983	9904.83	3	RASSF7
Q14108	Q14108	SCRB2_HUMAN	SCARB2	SCARB2	Lysosome membrane protein 2	1.16127	0.0253808	0.214934	0.404944	202891	187631	191721	210761	233193	232186	17.6303	17.5175	17.5486	17.6852	17.8312	17.8249	+	EtOH_Cnrtl	Cluster -224	aminophospholipid transport;biological regulation;biosynthetic process;cellular biosynthetic process;cellular localization;cellular macromolecule localization;cellular metabolic process;cellular process;endocytosis;establishment of localization;establishment of protein localization;establishment of protein localization to organelle;establishment of protein localization to vacuole;gene expression;…	alcohol binding;binding;cargo receptor activity;cation binding;cholesterol binding;enzyme binding;exogenous protein binding;identical protein binding;ion binding;lipid binding;modified amino acid binding;molecular transducer activity;organic cyclic compound binding;phosphatidylcholine binding;phosphatidylserine binding;phospholipid binding;protein binding;protein dimerization activity;protein hom…	anchoring junction;bounding membrane of organelle;cell junction;cell-substrate junction;cellular anatomical entity;clathrin-coated endocytic vesicle membrane;clathrin-coated vesicle membrane;coated vesicle membrane;cytoplasm;cytoplasmic vesicle membrane;endocytic vesicle membrane;endoplasmic reticulum membrane;endosome membrane;extracellular exosome;extracellular membrane-bounded organelle;extrac…	Lysosome	0	1.5955	0.214934	3.68589	Q14108	Q14108	SCRB2_HUMAN	SCARB2	SCARB2	Lysosome membrane protein 2	202891	187631	191721	3	210761	233193	232186	3	SCARB2
P57729	P57729	RAB38_HUMAN	RAB38	RAB38	Ras-related protein Rab-38	1.307	0.0255747	0.38505	0.979177	5600.14	4941.81	4744.66	6161.78	6384.98	7432.9	12.4512	12.2708	12.2121	12.5891	12.6405	12.8597	+	EtOH_Cnrtl	Cluster -224	biological regulation;cellular component assembly;cellular component organization;cellular component organization or biogenesis;cellular homeostasis;cellular localization;cellular macromolecule localization;cellular process;chemical homeostasis;endosome to melanosome transport;endosome to pigment granule transport;establishment of localization;establishment of localization in cell;establishment o…	anion binding;AP-1 adaptor complex binding;AP-3 adaptor complex binding;binding;BLOC-2 complex binding;carbohydrate derivative binding;catalytic activity;GTP binding;GTP-dependent protein binding;GTPase activity;guanyl nucleotide binding;guanyl ribonucleotide binding;heterocyclic compound binding;hydrolase activity;hydrolase activity, acting on acid anhydrides;hydrolase activity, acting on acid a…	bounding membrane of organelle;cell body;cellular anatomical entity;cytoplasmic vesicle;cytoplasmic vesicle membrane;cytosol;early endosome;endocytic vesicle;endocytic vesicle membrane;endomembrane system;endosome;Golgi apparatus subcompartment;intracellular membrane-bounded organelle;intracellular organelle;intracellular vesicle;lysosome;lytic vacuole;melanosome;melanosome membrane;membrane;memb…		0	1.59219	0.38505	3.50597	P57729	P57729	RAB38_HUMAN	RAB38	RAB38	Ras-related protein Rab-38	5600.14	4941.81	4744.66	3	6161.78	6384.98	7432.9	3	RAB38
P33981;P33981-2	P33981	TTK_HUMAN	TTK	TTK	Dual specificity protein kinase TTK	0.879168	0.0258075	-0.185187	0.945683	12312.8	11722.6	11151	9944.97	10658.7	10331.1	13.5879	13.517	13.4449	13.2798	13.3797	13.3347	+	EtOH_Cnrtl	Cluster -223	biological regulation;cell cycle checkpoint signaling;cell cycle process;cellular component organization;cellular component organization or biogenesis;cellular localization;cellular macromolecule localization;cellular metabolic process;cellular process;cellular process involved in reproduction in multicellular organism;chromosome segregation;cytoskeleton organization;female meiosis chromosome seg…	adenyl nucleotide binding;adenyl ribonucleotide binding;anion binding;ATP binding;binding;carbohydrate derivative binding;catalytic activity;catalytic activity, acting on a protein;heterocyclic compound binding;identical protein binding;ion binding;kinase activity;kinetochore binding;nucleoside phosphate binding;nucleotide binding;organic cyclic compound binding;phosphotransferase activity, alcoh…	cellular anatomical entity;cytoplasm;intracellular membrane-bounded organelle;intracellular non-membrane-bounded organelle;intracellular organelle;kinetochore;membrane;membrane-bounded organelle;non-membrane-bounded organelle;nucleus;organelle;spindle;supramolecular complex	Cell cycle;Cell cycle - yeast	0	1.58825	-0.185187	-3.67465	P33981;P33981-2	P33981	TTK_HUMAN	TTK	TTK	Dual specificity protein kinase TTK	12312.8	11722.6	11151	3	9944.97	10658.7	10331.1	3	TTK
O15091;O15091-4	O15091	MRPP3_HUMAN	PRORP	PRORP	Mitochondrial ribonuclease P catalytic subunit	1.26366	0.0258827	0.338097	0.820686	27535.7	24496.9	23291.8	34700.6	30394.9	30088.8	14.749	14.5803	14.5075	15.0827	14.8915	14.8769	+	EtOH_Cnrtl	Cluster -224	biosynthetic process;cellular aromatic compound metabolic process;cellular biosynthetic process;cellular metabolic process;cellular nitrogen compound metabolic process;cellular process;gene expression;heterocycle metabolic process;macromolecule biosynthetic process;macromolecule metabolic process;metabolic process;mitochondrial gene expression;mitochondrial RNA 5'-end processing;mitochondrial RNA…	binding;catalytic activity;catalytic activity, acting on a nucleic acid;catalytic activity, acting on a tRNA;catalytic activity, acting on RNA;cation binding;endonuclease activity;endonuclease activity, active with either ribo- or deoxyribonucleic acids and producing 5'-phosphomonoesters;hydrolase activity;hydrolase activity, acting on ester bonds;ion binding;metal ion binding;nuclease activity;r…	catalytic complex;cellular anatomical entity;endonuclease complex;endoribonuclease complex;intracellular membrane-bounded organelle;intracellular non-membrane-bounded organelle;intracellular organelle;intracellular organelle lumen;intracellular protein-containing complex;membrane-bounded organelle;membrane-enclosed lumen;mitochondrial matrix;mitochondrial nucleoid;mitochondrial protein-containing…		0	1.58699	0.338097	3.46737	O15091;O15091-4	O15091	MRPP3_HUMAN	PRORP	PRORP	Mitochondrial ribonuclease P catalytic subunit	27535.7	24496.9	23291.8	3	34700.6	30394.9	30088.8	3	PRORP
O76021	O76021	RL1D1_HUMAN	RSL1D1	RSL1D1	Ribosomal L1 domain-containing protein 1	1.21234	0.0258912	0.278804	0.620541	115157	111826	100056	126425	140900	129157	16.8132	16.7709	16.6104	16.9479	17.1043	16.9788	+	EtOH_Cnrtl	Cluster -224	biological regulation;cell differentiation;cellular aromatic compound metabolic process;cellular developmental process;cellular metabolic process;cellular nitrogen compound metabolic process;cellular process;developmental process;heterocycle metabolic process;macromolecule metabolic process;maturation of LSU-rRNA;metabolic process;ncRNA metabolic process;ncRNA processing;nitrogen compound metabol…	binding;cadherin binding;cell adhesion molecule binding;mRNA 3'-UTR binding;mRNA 5'-UTR binding;mRNA binding;nucleic acid binding;organic cyclic compound binding;protein binding;RNA binding	90S preribosome;cellular anatomical entity;chromosome;cytosolic large ribosomal subunit;intracellular non-membrane-bounded organelle;intracellular organelle;large ribosomal subunit;membrane;non-membrane-bounded organelle;nucleolus;organelle;preribosome;protein-containing complex;ribonucleoprotein complex;ribosomal subunit		0	1.58685	0.278804	3.56918	O76021	O76021	RL1D1_HUMAN	RSL1D1	RSL1D1	Ribosomal L1 domain-containing protein 1	115157	111826	100056	3	126425	140900	129157	3	RSL1D1
Q8WVC6	Q8WVC6	DCAKD_HUMAN	DCAKD	DCAKD	Dephospho-CoA kinase domain-containing protein	1.40736	0.0259649	0.497025	1.35715	5051.16	5362.89	4156.74	6157.48	7435	6913.8	12.3024	12.3888	12.0212	12.5881	12.8601	12.7553	+	EtOH_Cnrtl	Cluster -224	aromatic compound biosynthetic process;biosynthetic process;carbohydrate derivative biosynthetic process;carbohydrate derivative metabolic process;cellular aromatic compound metabolic process;cellular biosynthetic process;cellular metabolic process;cellular nitrogen compound biosynthetic process;cellular nitrogen compound metabolic process;cellular process;coenzyme A biosynthetic process;coenzyme…	adenyl nucleotide binding;adenyl ribonucleotide binding;anion binding;ATP binding;binding;carbohydrate derivative binding;catalytic activity;dephospho-CoA kinase activity;heterocyclic compound binding;ion binding;kinase activity;nucleoside phosphate binding;nucleotide binding;organic cyclic compound binding;phosphotransferase activity, alcohol group as acceptor;purine nucleotide binding;purine ri…	cellular anatomical entity;membrane		0	1.58561	0.497025	3.64586	Q8WVC6	Q8WVC6	DCAKD_HUMAN	DCAKD	DCAKD	Dephospho-CoA kinase domain-containing protein	5051.16	5362.89	4156.74	3	6157.48	7435	6913.8	3	DCAKD
P23381	P23381	SYWC_HUMAN	WARS1	WARS1	Tryptophan--tRNA ligase, cytoplasmic	1.03247	0.0259841	0.0460625	0.165089	616718	625809	624051	641670	634876	650649	19.2343	19.2554	19.2513	19.2915	19.2761	19.3115	+	EtOH_Cnrtl	Cluster -224	amide biosynthetic process;amide metabolic process;amino acid activation;amino acid metabolic process;anatomical structure formation involved in morphogenesis;angiogenesis;biological regulation;biosynthetic process;carboxylic acid metabolic process;cellular aromatic compound metabolic process;cellular biosynthetic process;cellular metabolic process;cellular nitrogen compound biosynthetic process;…	adenyl nucleotide binding;adenyl ribonucleotide binding;aminoacyl-tRNA ligase activity;anion binding;ATP binding;binding;carbohydrate derivative binding;catalytic activity;catalytic activity, acting on a nucleic acid;catalytic activity, acting on a tRNA;catalytic activity, acting on RNA;enzyme binding;enzyme inhibitor activity;enzyme regulator activity;heterocyclic compound binding;identical prot…	cellular anatomical entity;cytoplasm;cytosol;extracellular exosome;extracellular membrane-bounded organelle;extracellular organelle;extracellular vesicle;intracellular membrane-bounded organelle;intracellular organelle;membrane-bounded organelle;nucleus;organelle;protein-containing complex;vesicle	Aminoacyl-tRNA biosynthesis;Tryptophan metabolism	0	1.58529	0.0460625	3.80044	P23381	P23381	SYWC_HUMAN	WARS1	WARS1	Tryptophan--tRNA ligase, cytoplasmic	616718	625809	624051	3	641670	634876	650649	3	WARS1
P20700	P20700	LMNB1_HUMAN	LMNB1	LMNB1	Lamin-B1	1.19731	0.026134	0.258509	0.552035	983487	963565	900993	1.2e+06	1.05e+06	1.16e+06	19.9075	19.878	19.7812	20.1946	20.002	20.1457	+	EtOH_Cnrtl	Cluster -224	biological regulation;cellular component organization;cellular component organization or biogenesis;cellular localization;cellular macromolecule localization;cellular process;chromatin organization;chromatin remodeling;epigenetic regulation of gene expression;establishment of localization;establishment of localization in cell;establishment of organelle localization;heterochromatin formation;heter…	binding;DNA binding;double-stranded DNA binding;enzyme binding;nucleic acid binding;organic cyclic compound binding;phospholipase binding;protein binding;sequence-specific DNA binding;sequence-specific double-stranded DNA binding;structural constituent of cytoskeleton;structural molecule activity	cellular anatomical entity;envelope;intermediate filament;intracellular membrane-bounded organelle;intracellular organelle;lamin filament;membrane;membrane-bounded organelle;nuclear envelope;nuclear inner membrane;nuclear lamina;nuclear matrix;nuclear membrane;nucleoplasm;nucleus;organelle;organelle envelope;organelle inner membrane;organelle membrane;polymeric cytoskeletal fiber;supramolecular c…		0	1.58279	0.258509	3.73142	P20700	P20700	LMNB1_HUMAN	LMNB1	LMNB1	Lamin-B1	983487	963566	900993	3	1200000	1050000	1160000	3	LMNB1
Q8NI08;Q8NI08-2	Q8NI08	NCOA7_HUMAN	NCOA7	NCOA7	Nuclear receptor coactivator 7	1.11901	0.0264502	0.161909	0.225957	23999.4	24864.6	23193	28002.2	26935.2	25694.8	14.5507	14.6018	14.5014	14.7733	14.7172	14.6492	+	EtOH_Cnrtl	Cluster -224	biological regulation;negative regulation of biological process;negative regulation of cellular process;negative regulation of cellular response to oxidative stress;negative regulation of macromolecule metabolic process;negative regulation of metabolic process;negative regulation of nitrogen compound metabolic process;negative regulation of peptidyl-cysteine S-nitrosylation;negative regulation of…	binding;DNA-binding transcription factor binding;nuclear receptor binding;nuclear receptor coactivator activity;protein binding;RNA polymerase II-specific DNA-binding transcription factor binding;transcription coactivator activity;transcription coregulator activity;transcription factor binding;transcription regulator activity	cellular anatomical entity;intracellular membrane-bounded organelle;intracellular organelle;membrane-bounded organelle;nucleus;organelle		0	1.57757	0.161909	3.51083	Q8NI08;Q8NI08-2	Q8NI08	NCOA7_HUMAN	NCOA7	NCOA7	Nuclear receptor coactivator 7	23999.4	24864.6	23193	3	28002.2	26935.2	25694.8	3	NCOA7
P35527;cRAP-P35527	P35527	K1C9_HUMAN;cRAP-K1C9_HUMAN	KRT9;cRAP-KRT9	KRT9	Keratin, type I cytoskeletal 9	0.0656247	0.0269872	-3.70934	12.8416	13092.4	91271.6	50811.7	2223.84	5887.33	2072.19	13.6764	16.4779	15.6329	11.1188	12.5234	11.0169	+	EtOH_Cnrtl	Cluster -223	anatomical structure development;animal organ development;cell differentiation;cellular component organization;cellular component organization or biogenesis;cellular developmental process;cellular process;cytoskeleton organization;developmental process;developmental process involved in reproduction;epidermis development;epithelial cell differentiation;gamete generation;intermediate filament cytos…	structural constituent of cytoskeleton;structural molecule activity	cellular anatomical entity;cytoskeleton;cytosol;extracellular exosome;extracellular membrane-bounded organelle;extracellular organelle;extracellular space;extracellular vesicle;intermediate filament;intracellular membrane-bounded organelle;intracellular non-membrane-bounded organelle;intracellular organelle;keratin filament;membrane;membrane-bounded organelle;non-membrane-bounded organelle;nucleu…		2	1.56884	-3.70934	-3.85768	P35527;cRAP-P35527	P35527	K1C9_HUMAN;cRAP-K1C9_HUMAN	KRT9;cRAP-KRT9	KRT9	Keratin, type I cytoskeletal 9	13092.4	91271.6	50811.7	3		5887.33		1	KRT9
Q9H019;Q9H019-3	Q9H019	MFR1L_HUMAN	MTFR1L	MTFR1L	Mitochondrial fission regulator 1-like	1.35661	0.0272851	0.435353	1.14898	48838.6	47850.9	52696.1	69166.2	73995	59497.4	15.5757	15.5463	15.6854	16.0778	16.1751	15.8605	+	EtOH_Cnrtl	Cluster -224	aerobic respiration;cellular component organization;cellular component organization or biogenesis;cellular metabolic process;cellular process;cellular respiration;energy derivation by oxidation of organic compounds;generation of precursor metabolites and energy;metabolic process;mitochondrial fission;mitochondrion organization;organelle fission;organelle organization		cellular anatomical entity;intracellular membrane-bounded organelle;intracellular organelle;membrane-bounded organelle;mitochondrion;organelle		0	1.56407	0.435353	4.26095	Q9H019;Q9H019-3	Q9H019	MFR1L_HUMAN	MTFR1L	MTFR1L	Mitochondrial fission regulator 1-like	48838.6	47850.9	52696.1	3	69166.2	73995	59497.4	3	MTFR1L
Q8WZ64	Q8WZ64	ARAP2_HUMAN	ARAP2	ARAP2	Arf-GAP with Rho-GAP domain, ANK repeat and PH domain-containing protein 2	1.43483	0.0273368	0.516769	1.4238	2513.49	3033.51	2568.72	3285.59	4277.57	4081.48	11.2955	11.5668	11.3268	11.6819	12.0626	11.9949	+	EtOH_Cnrtl	Cluster -224	biological regulation;cellular process;regulation of biological process;regulation of cellular process;signal transduction	anion binding;binding;cation binding;enzyme activator activity;enzyme regulator activity;GTPase activator activity;GTPase regulator activity;ion binding;lipid binding;metal ion binding;molecular function activator activity;molecular function regulator activity;nucleoside-triphosphatase regulator activity;phosphatidylinositol binding;phosphatidylinositol phosphate binding;phosphatidylinositol-3,4,…	cellular anatomical entity;cytoplasm	Endocytosis	0	1.56325	0.516769	3.55873	Q8WZ64	Q8WZ64	ARAP2_HUMAN	ARAP2	ARAP2	Arf-GAP with Rho-GAP domain, ANK repeat and PH domain-containing protein 2	2513.49	3033.51	2568.72	3	3285.59	4277.57	4081.48	3	ARAP2
Q6NVY1	Q6NVY1	HIBCH_HUMAN	HIBCH	HIBCH	3-hydroxyisobutyryl-CoA hydrolase, mitochondrial	1.24562	0.0274893	0.316829	0.748896	103653	109498	93614.3	120553	122362	139197	16.6614	16.7405	16.5144	16.8793	16.9008	17.0868	+	EtOH_Cnrtl	Cluster -224	alpha-amino acid catabolic process;alpha-amino acid metabolic process;amino acid catabolic process;amino acid metabolic process;branched-chain amino acid catabolic process;branched-chain amino acid metabolic process;carboxylic acid catabolic process;carboxylic acid metabolic process;catabolic process;cellular catabolic process;cellular metabolic process;cellular process;metabolic process;nitrogen…	3-hydroxyisobutyryl-CoA hydrolase activity;catalytic activity;CoA hydrolase activity;hydrolase activity;hydrolase activity, acting on ester bonds;thiolester hydrolase activity	cellular anatomical entity;intracellular membrane-bounded organelle;intracellular organelle;intracellular organelle lumen;membrane-bounded organelle;membrane-enclosed lumen;mitochondrial matrix;mitochondrion;organelle;organelle lumen	beta-Alanine metabolism;Propanoate metabolism;Valine, leucine and isoleucine degradation	0	1.56084	0.316829	3.39166	Q6NVY1	Q6NVY1	HIBCH_HUMAN	HIBCH	HIBCH	3-hydroxyisobutyryl-CoA hydrolase, mitochondrial	103653	109498	93614.2	3	120553	122362	139197	3	HIBCH
P54253	P54253	ATX1_HUMAN	ATXN1	ATXN1	Ataxin-1	1.42565	0.0281349	0.517143	1.42506	26967.4	21035.8	26853.3	36299.4	38321.5	32098.2	14.7189	14.3606	14.7128	15.1477	15.2259	14.9702	+	EtOH_Cnrtl	Cluster -224	anatomical structure development;animal organ development;behavior;biological process involved in intraspecies interaction between organisms;biological regulation;brain development;cellular aromatic compound metabolic process;cellular localization;cellular metabolic process;cellular nitrogen compound metabolic process;cellular process;cognition;developmental process;establishment of localization;…	binding;DNA binding;identical protein binding;nucleic acid binding;organic cyclic compound binding;poly-purine tract binding;poly-pyrimidine tract binding;poly(G) binding;poly(U) RNA binding;protein binding;protein self-association;RNA binding;single-stranded RNA binding	cellular anatomical entity;cytoplasm;cytosol;inclusion body;intracellular anatomical structure;intracellular membrane-bounded organelle;intracellular non-membrane-bounded organelle;intracellular organelle;membrane-bounded organelle;non-membrane-bounded organelle;nuclear inclusion body;nuclear matrix;nucleolus;nucleoplasm;nucleus;organelle		0	1.55075	0.517143	3.67973	P54253	P54253	ATX1_HUMAN	ATXN1	ATXN1	Ataxin-1	26967.4	21035.8	26853.3	3	36299.4	38321.5	32098.2	3	ATXN1
P48723	P48723	HSP13_HUMAN	HSPA13	HSPA13	Heat shock 70 kDa protein 13	1.11791	0.0283342	0.160318	0.220587	42373.1	44911.5	42882.6	46507.3	50791	48217.3	15.3709	15.4548	15.3881	15.5052	15.6323	15.5573	+	EtOH_Cnrtl	Cluster -224	'de novo' post-translational protein folding;'de novo' protein folding;cellular process;chaperone cofactor-dependent protein refolding;chaperone-mediated protein folding;protein folding;protein refolding	adenyl nucleotide binding;adenyl ribonucleotide binding;anion binding;ATP binding;ATP hydrolysis activity;ATP-dependent activity;ATP-dependent protein folding chaperone;binding;carbohydrate derivative binding;catalytic activity;heat shock protein binding;heterocyclic compound binding;hydrolase activity;hydrolase activity, acting on acid anhydrides;hydrolase activity, acting on acid anhydrides, in…	cellular anatomical entity;cytoplasm;cytosol;endoplasmic reticulum;extracellular exosome;extracellular membrane-bounded organelle;extracellular organelle;extracellular vesicle;intracellular membrane-bounded organelle;intracellular organelle;membrane;membrane-bounded organelle;nucleus;organelle;plasma membrane;vesicle		0	1.54769	0.160318	3.57043	P48723	P48723	HSP13_HUMAN	HSPA13	HSPA13	Heat shock 70 kDa protein 13	42373.1	44911.5	42882.6	3	46507.3	50791	48217.3	3	HSPA13
Q86UP2	Q86UP2	KTN1_HUMAN	KTN1	KTN1	Kinectin	1.27323	0.0284322	0.350953	0.864082	148776	158688	131121	197134	187931	173353	17.1828	17.2758	17.0005	17.5888	17.5198	17.4034	+	EtOH_Cnrtl	Cluster -224	cellular localization;cellular macromolecule localization;cellular process;establishment of localization;establishment of protein localization;localization;macromolecule localization;microtubule-based movement;microtubule-based process;nitrogen compound transport;organic substance transport;protein localization;protein transport;transport	binding;cadherin binding;cell adhesion molecule binding;cytoskeletal protein binding;kinesin binding;nucleic acid binding;organic cyclic compound binding;protein binding;RNA binding	cellular anatomical entity;endoplasmic reticulum;endoplasmic reticulum lumen;endoplasmic reticulum membrane;intracellular membrane-bounded organelle;intracellular organelle;intracellular organelle lumen;membrane;membrane-bounded organelle;membrane-enclosed lumen;organelle;organelle lumen;organelle membrane;plasma membrane		0	1.54619	0.350953	3.60722	Q86UP2	Q86UP2	KTN1_HUMAN	KTN1	KTN1	Kinectin	148776	158688	131121	3	197134	187931	173353	3	KTN1
P09601	P09601	HMOX1_HUMAN	HMOX1	HMOX1	Heme oxygenase 1	1.13273	0.0285186	0.180632	0.289157	142244	155352	143304	169625	161476	168321	17.118	17.2452	17.1287	17.372	17.301	17.3609	+	EtOH_Cnrtl	Cluster -224	anatomical structure formation involved in morphogenesis;angiogenesis;apoptotic process;aromatic compound catabolic process;autophagy;biological regulation;catabolic process;cell death;cell population proliferation;cellular aromatic compound metabolic process;cellular catabolic process;cellular homeostasis;cellular metabolic process;cellular nitrogen compound catabolic process;cellular nitrogen c…	binding;catalytic activity;cation binding;enzyme binding;heme binding;heme oxygenase (decyclizing) activity;identical protein binding;ion binding;metal ion binding;monooxygenase activity;organic cyclic compound binding;oxidoreductase activity;oxidoreductase activity, acting on paired donors, with incorporation or reduction of molecular oxygen;oxidoreductase activity, acting on paired donors, with…	bounding membrane of organelle;cellular anatomical entity;cytosol;endoplasmic reticulum;endoplasmic reticulum membrane;extracellular space;intracellular membrane-bounded organelle;intracellular organelle;membrane;membrane-bounded organelle;mitochondrial membrane;mitochondrial outer membrane;nucleoplasm;nucleus;organelle;organelle membrane;organelle outer membrane;outer membrane;perinuclear region…	Mineral absorption;Porphyrin and chlorophyll metabolism	0	1.54487	0.180632	3.90025	P09601	P09601	HMOX1_HUMAN	HMOX1	HMOX1	Heme oxygenase 1	142244	155352	143304	3	169625	161476	168321	3	HMOX1
Q5TDH0	Q5TDH0	DDI2_HUMAN	DDI2	DDI2	Protein DDI1 homolog 2	0.946955	0.0288221	-0.0786572	0.586086	202258	194604	198328	192363	185729	185526	17.6258	17.5702	17.5975	17.5535	17.5028	17.5013	+	EtOH_Cnrtl	Cluster -223	biological regulation;catabolic process;cellular process;cellular response to chemical stimulus;cellular response to hydroxyurea;cellular response to inorganic substance;cellular response to nitrogen compound;cellular response to stimulus;macromolecule catabolic process;macromolecule metabolic process;metabolic process;nitrogen compound metabolic process;organic substance catabolic process;organi…	aspartic-type endopeptidase activity;aspartic-type peptidase activity;binding;catalytic activity;catalytic activity, acting on a protein;endopeptidase activity;hydrolase activity;identical protein binding;peptidase activity;protein binding;ubiquitin binding;ubiquitin-like protein binding	cellular anatomical entity;chromosome;cytosol;intracellular non-membrane-bounded organelle;intracellular organelle;non-membrane-bounded organelle;nucleoplasm;organelle		0	1.54027	-0.0786572	-3.34738	Q5TDH0	Q5TDH0	DDI2_HUMAN	DDI2	DDI2	Protein DDI1 homolog 2	202258	194604	198328	3	192363	185729	185526	3	DDI2
Q96CN5	Q96CN5	LRC45_HUMAN	LRRC45	LRRC45	Leucine-rich repeat-containing protein 45	1.42116	0.028974	0.513286	1.41204	4192.73	4608.89	5542.8	6511.29	6393.91	7480.52	12.0337	12.1702	12.4364	12.6687	12.6425	12.8689	+	EtOH_Cnrtl	Cluster -224			cellular anatomical entity;centrosome;cytosol;membrane;microtubule organizing center;nucleoplasm;plasma membrane		0	1.53799	0.513286	3.71438	Q96CN5	Q96CN5	LRC45_HUMAN	LRRC45	LRRC45	Leucine-rich repeat-containing protein 45	4192.73	4608.89	5542.8	3	6511.29	6393.91	7480.52	3	LRRC45
Q92558	Q92558	WASF1_HUMAN	WASF1	WASF1	Actin-binding protein WASF1	1.18692	0.029025	0.246762	0.512381	9661.43	8625.44	8936.19	10994.6	11334.6	9982.47	13.238	13.0744	13.1254	13.4245	13.4684	13.2852	+	EtOH_Cnrtl	Cluster -224	actin cytoskeleton organization;actin filament organization;actin filament polymerization;actin filament-based process;actin polymerization or depolymerization;anatomical structure morphogenesis;biological regulation;cell growth;cell junction organization;cell projection morphogenesis;cell projection organization;cellular anatomical entity morphogenesis;cellular component assembly;cellular compon…	actin binding;Arp2/3 complex binding;binding;cytoskeletal protein binding;protein binding;protein kinase A binding;protein kinase A regulatory subunit binding;protein-containing complex binding	actin cytoskeleton;anchoring junction;bounding membrane of organelle;cell junction;cell projection;cell-substrate junction;cellular anatomical entity;cytoskeleton;cytosol;focal adhesion;intracellular non-membrane-bounded organelle;intracellular organelle;lamellipodium;membrane;mitochondrial membrane;mitochondrial outer membrane;non-membrane-bounded organelle;organelle;organelle membrane;organelle…	Adherens junction;Bacterial invasion of epithelial cells;Fc gamma R-mediated phagocytosis;Regulation of actin cytoskeleton;Shigellosis	0	1.53723	0.246762	3.3617	Q92558	Q92558	WASF1_HUMAN	WASF1	WASF1	Actin-binding protein WASF1	9661.43	8625.44	8936.19	3	10994.6	11334.6	9982.47	3	WASF1
E5RK69	E5RK69	E5RK69_HUMAN	ANXA6	ANXA6	Annexin	0.272873	0.0290532	-1.96835	6.96484	9584.92	10102.8	14185.8	1654.45	3058.56	4530.15	13.2266	13.3025	13.7922	10.6921	11.5786	12.1453	+	EtOH_Cnrtl	Cluster -223		binding;calcium ion binding;calcium-dependent phospholipid binding;cation binding;ion binding;lipid binding;metal ion binding;phospholipid binding			3	1.53681	-1.96835	-4.29285	E5RK69	E5RK69	E5RK69_HUMAN	ANXA6	ANXA6	Annexin	9584.92	10102.8	14185.8	3				0	ANXA6
P57682	P57682	KLF3_HUMAN	KLF3	KLF3	Krueppel-like factor 3	0.861524	0.0292482	-0.213852	1.04244	3314.26	2953.06	3137.24	2791.42	2668.52	2642.31	11.6945	11.528	11.6153	11.4468	11.3818	11.3676	+	EtOH_Cnrtl	Cluster -223	anatomical structure development;biological regulation;cell development;cellular developmental process;cellular process;cellular response to chemical stimulus;cellular response to endogenous stimulus;cellular response to nitrogen compound;cellular response to organic substance;cellular response to organonitrogen compound;cellular response to oxygen-containing compound;cellular response to peptide…	binding;cation binding;cis-regulatory region sequence-specific DNA binding;DNA binding;DNA-binding transcription factor activity;DNA-binding transcription factor activity, RNA polymerase II-specific;double-stranded DNA binding;ion binding;metal ion binding;nucleic acid binding;organic cyclic compound binding;RNA polymerase II cis-regulatory region sequence-specific DNA binding;RNA polymerase II t…	cellular anatomical entity;chromatin;nucleoplasm;protein-containing complex;protein-DNA complex		0	1.5339	-0.213852	-3.96736	P57682	P57682	KLF3_HUMAN	KLF3	KLF3	Krueppel-like factor 3	3314.26	2953.06	3137.24	3	2791.42	2668.52	2642.31	3	KLF3
Q96EY1	Q96EY1	DNJA3_HUMAN	DNAJA3	DNAJA3	DnaJ homolog subfamily A member 3, mitochondrial	1.20697	0.0294768	0.272737	0.600062	37432.4	36247.9	41911.6	49429	45612	44474.4	15.192	15.1456	15.3551	15.5931	15.4771	15.4407	+	EtOH_Cnrtl	Cluster -224	activation of cysteine-type endopeptidase activity involved in apoptotic process;activation-induced cell death of T cells;apoptotic process;biological regulation;cell activation;cell death;cell differentiation;cell junction organization;cellular aromatic compound metabolic process;cellular component organization;cellular component organization or biogenesis;cellular developmental process;cellular…	adenyl nucleotide binding;adenyl ribonucleotide binding;anion binding;ATP binding;binding;carbohydrate derivative binding;cation binding;cytokine receptor binding;DNA-binding transcription factor binding;enzyme binding;enzyme regulator activity;GTPase regulator activity;heat shock protein binding;heterocyclic compound binding;Hsp70 protein binding;IkappaB kinase complex binding;ion binding;kinase…	cell junction;cellular anatomical entity;cytoplasm;cytoplasmic side of membrane;cytoplasmic side of plasma membrane;cytosol;intracellular membrane-bounded organelle;intracellular non-membrane-bounded organelle;intracellular organelle;intracellular organelle lumen;membrane;membrane-bounded organelle;membrane-enclosed lumen;mitochondrial matrix;mitochondrial nucleoid;mitochondrion;neuromuscular jun…		0	1.53052	0.272737	3.47934	Q96EY1	Q96EY1	DNJA3_HUMAN	DNAJA3	DNAJA3	DnaJ homolog subfamily A member 3, mitochondrial	37432.4	36247.9	41911.6	3	49429	45612	44474.4	3	DNAJA3
Q56VL3	Q56VL3	OCAD2_HUMAN	OCIAD2	OCIAD2	OCIA domain-containing protein 2	1.47475	0.0299998	0.558711	1.56538	6179.99	4709.11	5574.29	8014.37	9337.03	6927.94	12.5934	12.2012	12.4446	12.9684	13.1887	12.7582	+	EtOH_Cnrtl	Cluster -224	biological process involved in interspecies interaction between organisms;biological regulation;cellular process;endocytosis;establishment of localization;hematopoietic stem cell homeostasis;homeostasis of number of cells;homeostatic process;import into cell;localization;multicellular organismal process;multicellular organismal-level homeostasis;positive regulation of biological process;positive …		cellular anatomical entity;cytoplasmic vesicle;endosome;Golgi apparatus;intracellular membrane-bounded organelle;intracellular organelle;intracellular vesicle;lysosome;lytic vacuole;membrane-bounded organelle;organelle;vacuole;vesicle		0	1.52288	0.558711	3.30876	Q56VL3	Q56VL3	OCAD2_HUMAN	OCIAD2	OCIAD2	OCIA domain-containing protein 2	6179.99	4709.11	5574.29	3	8014.37	9337.03	6927.94	3	OCIAD2
P67870	P67870	CSK2B_HUMAN	CSNK2B	CSNK2B	Casein kinase II subunit beta	1.21025	0.030084	0.277015	0.614502	499008	488646	564616	603951	611406	663275	18.9287	18.8984	19.1069	19.2041	19.2218	19.3392	+	EtOH_Cnrtl	Cluster -224	adiponectin-activated signaling pathway;anatomical structure morphogenesis;biological process involved in interspecies interaction between organisms;biological regulation;cell surface receptor signaling pathway;cellular component assembly;cellular component organization;cellular component organization or biogenesis;cellular metabolic process;cellular process;cytokine-mediated signaling pathway;de…	binding;catalytic activity;catalytic activity, acting on a protein;cation binding;chromatin binding;DNA-binding transcription factor binding;enzyme regulator activity;identical protein binding;ion binding;kinase activity;kinase regulator activity;metal ion binding;molecular adaptor activity;molecular function regulator activity;phosphotransferase activity, alcohol group as acceptor;protein bindin…	catalytic complex;cellular anatomical entity;chromatin;cytoplasm;cytoplasmic vesicle lumen;cytosol;extracellular exosome;extracellular membrane-bounded organelle;extracellular organelle;extracellular region;extracellular vesicle;ficolin-1-rich granule lumen;intracellular membrane-bounded organelle;intracellular organelle;intracellular organelle lumen;intracellular protein-containing complex;membr…	Adherens junction;Circadian rhythm - plant;Measles;Ribosome biogenesis in eukaryotes;Tight junction;Wnt signaling pathway	0	1.52166	0.277015	3.56759	P67870	P67870	CSK2B_HUMAN	CSNK2B	CSNK2B	Casein kinase II subunit beta	499008	488646	564616	3	603951	611406	663275	3	CSNK2B
P46020;P46020-2;P46020-3	P46020	KPB1_HUMAN	PHKA1	PHKA1	Phosphorylase b kinase regulatory subunit alpha, skeletal muscle isoform	1.11606	0.0304619	0.157722	0.211824	6033.33	6235.6	6077.1	6737.71	7143.83	6593.65	12.5587	12.6063	12.5692	12.718	12.8025	12.6869	+	EtOH_Cnrtl	Cluster -224	carbohydrate metabolic process;cellular metabolic process;cellular process;energy derivation by oxidation of organic compounds;energy reserve metabolic process;generation of precursor metabolites and energy;glucan metabolic process;glycogen metabolic process;macromolecule metabolic process;metabolic process;organic substance metabolic process;polysaccharide metabolic process;primary metabolic pro…	binding;calmodulin binding;calmodulin-dependent protein kinase activity;catalytic activity;catalytic activity, acting on a protein;kinase activity;phosphorylase kinase activity;phosphotransferase activity, alcohol group as acceptor;protein binding;protein kinase activity;protein serine/threonine kinase activity;transferase activity;transferase activity, transferring phosphorus-containing groups	catalytic complex;cellular anatomical entity;cytosol;membrane;phosphorylase kinase complex;plasma membrane;protein kinase complex;protein-containing complex;serine/threonine protein kinase complex;transferase complex;transferase complex, transferring phosphorus-containing groups	Calcium signaling pathway;Insulin signaling pathway	0	1.51624	0.157722	4.21348	P46020;P46020-2;P46020-3	P46020	KPB1_HUMAN	PHKA1	PHKA1	Phosphorylase b kinase regulatory subunit alpha, skeletal muscle isoform	6033.33	6235.6	6077.1	3	6737.71	7143.83	6593.65	3	PHKA1
Q9Y6I3;Q9Y6I3-1;Q9Y6I3-3	Q9Y6I3	EPN1_HUMAN	EPN1	EPN1	Epsin-1	1.28495	0.030657	0.358864	0.890786	79735	83992.8	73584.8	91301.7	101720	111913	16.2829	16.358	16.1671	16.4784	16.6342	16.772	+	EtOH_Cnrtl	Cluster -224	anatomical structure development;animal organ development;biological regulation;cell surface receptor signaling pathway;cellular process;chordate embryonic development;developmental process;embryo development;embryo development ending in birth or egg hatching;embryonic organ development;endocytosis;establishment of localization;female pregnancy;import into cell;in utero embryonic development;loca…	binding;clathrin binding;lipid binding;molecular sequestering activity;phospholipid binding;protein binding	cellular anatomical entity;clathrin coat;clathrin vesicle coat;clathrin-coated pit;cytoplasmic vesicle;cytosol;endosome;intracellular membrane-bounded organelle;intracellular organelle;intracellular vesicle;membrane;membrane coat;membrane protein complex;membrane-bounded organelle;nucleus;organelle;plasma membrane;plasma membrane region;protein-containing complex;vesicle;vesicle coat	Endocytosis	0	1.51347	0.358864	3.53987	Q9Y6I3;Q9Y6I3-1;Q9Y6I3-3	Q9Y6I3	EPN1_HUMAN	EPN1	EPN1	Epsin-1	79735	83992.9	73584.8	3	91301.7	101720	111913	3	EPN1
Q5T3J3	Q5T3J3	LRIF1_HUMAN	LRIF1	LRIF1	Ligand-dependent nuclear receptor-interacting factor 1	1.2343	0.0307065	0.304439	0.707071	6110.62	7218.98	6657.11	8922.54	7796.67	7950.32	12.5771	12.8176	12.7007	13.1232	12.9286	12.9568	+	EtOH_Cnrtl	Cluster -224	biological regulation;cellular component organization;cellular component organization or biogenesis;cellular process;chromatin organization;chromatin remodeling;dosage compensation by inactivation of X chromosome;epigenetic regulation of gene expression;heterochromatin formation;heterochromatin organization;negative regulation of biological process;negative regulation of biosynthetic process;nega…	binding;DNA-binding transcription factor binding;nuclear receptor binding;nuclear retinoic acid receptor binding;protein binding;RNA polymerase II-specific DNA-binding transcription factor binding;transcription factor binding	Barr body;cellular anatomical entity;centriolar satellite;chromosome;intracellular non-membrane-bounded organelle;intracellular organelle;non-membrane-bounded organelle;nuclear chromosome;nuclear matrix;nucleoplasm;organelle;sex chromosome;X chromosome		0	1.51277	0.304439	3.30071	Q5T3J3	Q5T3J3	LRIF1_HUMAN	LRIF1	LRIF1	Ligand-dependent nuclear receptor-interacting factor 1	6110.62	7218.98	6657.11	3	8922.54	7796.67	7950.32	3	LRIF1
Q9HBL0-1;Q9HBL0	Q9HBL0-1	TENS1_HUMAN	TNS1	TNS1	Tensin-1	1.19588	0.0311049	0.2573	0.547954	10163	9432.91	9041.66	11543.9	12156.6	10546.7	13.311	13.2035	13.1424	13.4948	13.5695	13.3645	+	EtOH_Cnrtl	Cluster -224	ameboidal-type cell migration;cell migration;cell motility;cellular process;fibroblast migration	actin binding;binding;catalytic activity;catalytic activity, acting on a protein;cation binding;cytoskeletal protein binding;hydrolase activity;hydrolase activity, acting on ester bonds;ion binding;metal ion binding;nucleic acid binding;organic cyclic compound binding;phosphatase activity;phosphoprotein phosphatase activity;phosphoric ester hydrolase activity;protein binding;RNA binding	anchoring junction;cell junction;cell surface;cell-substrate junction;cellular anatomical entity;cytoplasm;cytoskeleton;focal adhesion;intracellular non-membrane-bounded organelle;intracellular organelle;non-membrane-bounded organelle;organelle		0	1.50717	0.2573	3.31698	Q9HBL0-1;Q9HBL0	Q9HBL0-1	TENS1_HUMAN	TNS1	TNS1	Tensin-1	10163	9432.91	9041.66	3	11543.9	12156.6	10546.7	3	TNS1
Q9NVP2	Q9NVP2	ASF1B_HUMAN	ASF1B	ASF1B	Histone chaperone ASF1B	0.559633	0.0312055	-0.830673	3.12455	28717.8	24263.4	38266.3	14607	15432.6	21025.5	14.8097	14.5665	15.2238	13.8344	13.9137	14.3599	+	EtOH_Cnrtl	Cluster -223	blastocyst hatching;cell differentiation;cellular component assembly;cellular component organization;cellular component organization or biogenesis;cellular developmental process;cellular process;chromatin organization;chromatin remodeling;developmental process;developmental process involved in reproduction;DNA replication-dependent chromatin assembly;gamete generation;hatching;male gamete generat…	binding;histone binding;histone chaperone activity;molecular carrier activity;protein binding;protein carrier chaperone	cellular anatomical entity;chromatin;cytosol;intracellular membrane-bounded organelle;intracellular organelle;membrane-bounded organelle;nucleoplasm;nucleus;organelle;protein-containing complex;protein-DNA complex		0	1.50577	-0.830673	-3.29478	Q9NVP2	Q9NVP2	ASF1B_HUMAN	ASF1B	ASF1B	Histone chaperone ASF1B	28717.8	24263.4	38266.3	3	14607	15432.6	21025.5	3	ASF1B
Q9NRV9	Q9NRV9	HEBP1_HUMAN	HEBP1	HEBP1	Heme-binding protein 1	1.09197	0.0315821	0.126959	0.107982	375157	364363	350802	411820	387302	391479	18.5171	18.475	18.4203	18.6517	18.5631	18.5786	+	EtOH_Cnrtl	Cluster -224	circadian rhythm;rhythmic process	binding;heme binding;organic cyclic compound binding;tetrapyrrole binding	cellular anatomical entity;cytoplasm;extracellular exosome;extracellular membrane-bounded organelle;extracellular organelle;extracellular region;extracellular vesicle;membrane-bounded organelle;organelle;vesicle		0	1.50056	0.126959	3.24412	Q9NRV9	Q9NRV9	HEBP1_HUMAN	HEBP1	HEBP1	Heme-binding protein 1	375157	364363	350802	3	411820	387302	391479	3	HEBP1
Q9NR31	Q9NR31	SAR1A_HUMAN	SAR1A	SAR1A	Small COPII coat GTPase SAR1A	0.849699	0.0316752	-0.233545	1.10892	441974	469500	411335	385044	358851	380093	18.7536	18.8408	18.65	18.5547	18.453	18.536	+	EtOH_Cnrtl	Cluster -223	biological regulation;cellular component organization;cellular component organization or biogenesis;cellular localization;cellular macromolecule localization;cellular process;COPII-coated vesicle cargo loading;endoplasmic reticulum to Golgi vesicle-mediated transport;establishment of localization;establishment of localization in cell;establishment of protein localization;Golgi vesicle transport;i…	anion binding;binding;carbohydrate derivative binding;catalytic activity;GTP binding;GTPase activity;guanyl nucleotide binding;guanyl ribonucleotide binding;heterocyclic compound binding;hydrolase activity;hydrolase activity, acting on acid anhydrides;hydrolase activity, acting on acid anhydrides, in phosphorus-containing anhydrides;ion binding;nucleoside phosphate binding;nucleotide binding;orga…	cellular anatomical entity;COPII vesicle coat;endoplasmic reticulum exit site;Golgi apparatus;intracellular membrane-bounded organelle;intracellular organelle;membrane coat;membrane protein complex;membrane-bounded organelle;organelle;protein-containing complex;vesicle coat	Protein processing in endoplasmic reticulum	0	1.49928	-0.233545	-3.6847	Q9NR31	Q9NR31	SAR1A_HUMAN	SAR1A	SAR1A	Small COPII coat GTPase SAR1A	441974	469500	411335	3	385044	358851	380093	3	SAR1A
O75582	O75582	KS6A5_HUMAN	RPS6KA5	RPS6KA5	Ribosomal protein S6 kinase alpha-5	1.29676	0.031833	0.37317	0.939077	33859.3	32916.7	38705.6	43493.5	42084.2	51207.1	15.0473	15.0065	15.2403	15.4085	15.361	15.6441	+	EtOH_Cnrtl	Cluster -224	axon guidance;biological regulation;cell projection organization;cell surface receptor signaling pathway;cellular component organization;cellular component organization or biogenesis;cellular metabolic process;cellular process;cytokine-mediated signaling pathway;defense response;inflammatory response;interleukin-1-mediated signaling pathway;intracellular signal transduction;macromolecule metaboli…	adenyl nucleotide binding;adenyl ribonucleotide binding;anion binding;ATP binding;binding;carbohydrate derivative binding;catalytic activity;catalytic activity, acting on a protein;cation binding;heterocyclic compound binding;histone H2A kinase activity;histone H2AS1 kinase activity;histone H3 kinase activity;histone H3S10 kinase activity;histone H3S28 kinase activity;histone kinase activity;hist…	cellular anatomical entity;cytoplasm;intracellular membrane-bounded organelle;intracellular organelle;membrane-bounded organelle;nucleoplasm;nucleus;organelle	MAPK signaling pathway;Neurotrophin signaling pathway	0	1.49712	0.37317	3.29128	O75582	O75582	KS6A5_HUMAN	RPS6KA5	RPS6KA5	Ribosomal protein S6 kinase alpha-5	33859.3	32916.7	38705.6	3	43493.5	42084.2	51207.1	3	RPS6KA5
P31483	P31483	TIA1_HUMAN	TIA1	TIA1	Cytotoxic granule associated RNA binding protein TIA1	1.26773	0.0319546	0.345327	0.845091	42513.1	35249.1	36632.4	50181.6	49769.5	45070.2	15.3756	15.1053	15.1608	15.6149	15.603	15.4599	+	EtOH_Cnrtl	Cluster -224	apoptotic process;biological regulation;cell death;cellular aromatic compound metabolic process;cellular component assembly;cellular component organization;cellular component organization or biogenesis;cellular localization;cellular macromolecule localization;cellular metabolic process;cellular nitrogen compound metabolic process;cellular process;heterocycle metabolic process;localization;macromo…	binding;mRNA 3'-UTR AU-rich region binding;mRNA 3'-UTR binding;mRNA binding;nucleic acid binding;organic cyclic compound binding;poly-purine tract binding;poly(A) binding;RNA binding;single-stranded RNA binding	cellular anatomical entity;cytoplasm;cytoplasmic ribonucleoprotein granule;cytoplasmic stress granule;cytosol;intracellular membrane-bounded organelle;intracellular non-membrane-bounded organelle;intracellular organelle;membrane-bounded organelle;non-membrane-bounded organelle;nuclear stress granule;nucleoplasm;nucleus;organelle;protein-containing complex;ribonucleoprotein complex;ribonucleoprote…		0	1.49547	0.345327	3.58594	P31483	P31483	TIA1_HUMAN	TIA1	TIA1	Cytotoxic granule associated RNA binding protein TIA1	42513.1	35249.1	36632.4	3	50181.6	49769.5	45070.2	3	TIA1
O95139	O95139	NDUB6_HUMAN	NDUFB6	NDUFB6	NADH dehydrogenase [ubiquinone] 1 beta subcomplex subunit 6	1.38535	0.0321309	0.464088	1.24597	32313.5	33488.2	30495	50179.5	43939	39286.3	14.9798	15.0314	14.8963	15.6148	15.4232	15.2617	+	EtOH_Cnrtl	Cluster -224	aerobic electron transport chain;aerobic respiration;aromatic compound biosynthetic process;ATP biosynthetic process;ATP metabolic process;ATP synthesis coupled electron transport;biosynthetic process;carbohydrate derivative biosynthetic process;carbohydrate derivative metabolic process;cellular aromatic compound metabolic process;cellular biosynthetic process;cellular component assembly;cellular…	active transmembrane transporter activity;catalytic activity;electron transfer activity;NAD(P)H dehydrogenase (quinone) activity;NADH dehydrogenase (quinone) activity;NADH dehydrogenase (ubiquinone) activity;NADH dehydrogenase activity;oxidoreductase activity;oxidoreductase activity, acting on NAD(P)H;oxidoreductase activity, acting on NAD(P)H, quinone or similar compound as acceptor;oxidoreducti…	catalytic complex;cellular anatomical entity;inner mitochondrial membrane protein complex;intracellular membrane-bounded organelle;intracellular organelle;membrane;membrane protein complex;membrane-bounded organelle;mitochondrial inner membrane;mitochondrial membrane;mitochondrial protein-containing complex;mitochondrial respiratory chain complex I;mitochondrion;NADH dehydrogenase complex;nucleop…	Alzheimer's disease;Huntington's disease;Oxidative phosphorylation;Parkinson's disease	0	1.49308	0.464088	4.24314	O95139	O95139	NDUB6_HUMAN	NDUFB6	NDUFB6	NADH dehydrogenase [ubiquinone] 1 beta subcomplex subunit 6	32313.5	33488.2	30495	3	50179.5	43939	39286.3	3	NDUFB6
Q5TFQ8	Q5TFQ8	SIRBL_HUMAN	SIRPB1	SIRPB1	Signal-regulatory protein beta-1 isoform 3	1.15349	0.0324776	0.204948	0.371238	23820.8	24222	23934.9	27920.3	26253.5	28852.1	14.5399	14.564	14.5468	14.769	14.6802	14.8164	+	EtOH_Cnrtl	Cluster -224			cellular anatomical entity;membrane	Osteoclast differentiation	0	1.48842	0.204948	5.05444	Q5TFQ8	Q5TFQ8	SIRBL_HUMAN	SIRPB1	SIRPB1	Signal-regulatory protein beta-1 isoform 3	23820.8	24222	23934.9	3	27920.3	26253.5	28852.1	3	SIRPB1
Q9HD42	Q9HD42	CHM1A_HUMAN	CHMP1A	CHMP1A	Charged multivesicular body protein 1a	0.721438	0.0325089	-0.477622	1.93281	150181	144627	131152	97649	91281.7	118373	17.1963	17.142	17.0009	16.5753	16.478	16.853	+	EtOH_Cnrtl	Cluster -223	autophagosome maturation;autophagy;biological process involved in interaction with host;biological process involved in interspecies interaction between organisms;biological process involved in symbiotic interaction;biological regulation;catabolic process;cell cycle process;cell division;cellular catabolic process;cellular component assembly;cellular component disassembly;cellular component organi…	binding;catalytic activity;catalytic activity, acting on a protein;cation binding;hydrolase activity;identical protein binding;ion binding;metal ion binding;metallopeptidase activity;peptidase activity;protein binding;protein dimerization activity;protein domain specific binding;protein homodimerization activity;transition metal ion binding;zinc ion binding	amphisome membrane;autophagosome membrane;bounding membrane of organelle;cellular anatomical entity;chromosome;condensed chromosome;condensed nuclear chromosome;cytoplasmic vesicle;cytoplasmic vesicle membrane;cytosol;early endosome;endomembrane system;endosome;endosome membrane;ESCRT complex;ESCRT III complex;extracellular exosome;extracellular membrane-bounded organelle;extracellular organelle;…		0	1.488	-0.477622	-3.77456	Q9HD42	Q9HD42	CHM1A_HUMAN	CHMP1A	CHMP1A	Charged multivesicular body protein 1a	150181	144627	131152	3	97649	91281.8	118373	3	CHMP1A
O43242	O43242	PSMD3_HUMAN	PSMD3	PSMD3	26S proteasome non-ATPase regulatory subunit 3	1.08028	0.0327113	0.11105	0.0542779	295276	294414	290151	312351	310812	327309	18.1717	18.1675	18.1464	18.2528	18.2457	18.3203	+	EtOH_Cnrtl	Cluster -224	biological regulation;catabolic process;macromolecule catabolic process;macromolecule metabolic process;metabolic process;modification-dependent macromolecule catabolic process;modification-dependent protein catabolic process;nitrogen compound metabolic process;organic substance catabolic process;organic substance metabolic process;organonitrogen compound catabolic process;organonitrogen compound…	enzyme regulator activity;molecular function regulator activity	catalytic complex;cellular anatomical entity;cytoplasmic vesicle lumen;cytosol;endopeptidase complex;extracellular exosome;extracellular membrane-bounded organelle;extracellular organelle;extracellular region;extracellular vesicle;ficolin-1-rich granule lumen;intracellular membrane-bounded organelle;intracellular organelle;intracellular organelle lumen;intracellular protein-containing complex;mem…	Proteasome	0	1.4853	0.11105	4.43795	O43242	O43242	PSMD3_HUMAN	PSMD3	PSMD3	26S proteasome non-ATPase regulatory subunit 3	295276	294414	290151	3	312351	310812	327309	3	PSMD3
Q9NYK5;Q9NYK5-2	Q9NYK5	RM39_HUMAN	MRPL39	MRPL39	Large ribosomal subunit protein mL39	1.23496	0.0327846	0.303097	0.702543	48992	52530.2	45797	65990	60485.9	55457.8	15.5803	15.6809	15.483	16.01	15.8843	15.7591	+	EtOH_Cnrtl	Cluster -224	amide biosynthetic process;amide metabolic process;biosynthetic process;cellular biosynthetic process;cellular metabolic process;cellular nitrogen compound biosynthetic process;cellular nitrogen compound metabolic process;cellular process;macromolecule biosynthetic process;macromolecule metabolic process;metabolic process;mitochondrial translation;nitrogen compound metabolic process;organic subst…	binding;heterocyclic compound binding;nucleic acid binding;nucleoside phosphate binding;nucleotide binding;organic cyclic compound binding;RNA binding;small molecule binding	cellular anatomical entity;intracellular membrane-bounded organelle;intracellular non-membrane-bounded organelle;intracellular organelle;large ribosomal subunit;membrane;membrane-bounded organelle;mitochondrial inner membrane;mitochondrial large ribosomal subunit;mitochondrial membrane;mitochondrial protein-containing complex;mitochondrial ribosome;mitochondrion;non-membrane-bounded organelle;org…		0	1.48433	0.303097	3.28602	Q9NYK5;Q9NYK5-2	Q9NYK5	RM39_HUMAN	MRPL39	MRPL39	Large ribosomal subunit protein mL39	48992	52530.2	45797	3	65990	60485.9	55457.8	3	MRPL39
P06493	P06493	CDK1_HUMAN	CDK1	CDK1	Cyclin-dependent kinase 1	0.748353	0.0329014	-0.413418	1.71609	178730	157479	194232	133361	136083	127513	17.4474	17.2648	17.5674	17.025	17.0541	16.9603	+	EtOH_Cnrtl	Cluster -223	anatomical structure development;animal organ development;animal organ regeneration;apoptotic process;biological regulation;cardiac cell development;cardiac muscle cell development;cell cycle checkpoint signaling;cell cycle G1/S phase transition;cell cycle G2/M phase transition;cell cycle phase transition;cell cycle process;cell death;cell development;cell differentiation;cell division;cell migra…	adenyl nucleotide binding;adenyl ribonucleotide binding;anion binding;ATP binding;binding;carbohydrate derivative binding;catalytic activity;catalytic activity, acting on a protein;chromatin binding;cyclin binding;cyclin-dependent protein kinase activity;cyclin-dependent protein serine/threonine kinase activity;exogenous protein binding;heat shock protein binding;heterocyclic compound binding;his…	catalytic complex;cellular anatomical entity;centrosome;chromosomal region;chromosome, telomeric region;cyclin A2-CDK1 complex;cyclin B1-CDK1 complex;cyclin-dependent protein kinase holoenzyme complex;cytoplasm;cytosol;endoplasmic reticulum membrane;extracellular exosome;extracellular membrane-bounded organelle;extracellular organelle;extracellular vesicle;intracellular membrane-bounded organelle…	Cell cycle;Gap junction;Oocyte meiosis;p53 signaling pathway;Progesterone-mediated oocyte maturation	0	1.48279	-0.413418	-4.48163	P06493	P06493	CDK1_HUMAN	CDK1	CDK1	Cyclin-dependent kinase 1	178730	157479	194232	3	133361	136083	127513	3	CDK1
Q9BVN2;Q9BVN2-4;Q9BVN2-2;Q9BVN2-3	Q9BVN2	RUSC1_HUMAN	RUSC1	RUSC1	AP-4 complex accessory subunit RUSC1	0.754334	0.0329579	-0.409266	1.70207	8260.8	8564.67	7198.45	5248.67	6408.2	6465.2	13.0121	13.0642	12.8135	12.3577	12.6457	12.6585	+	EtOH_Cnrtl	Cluster -223	macromolecule metabolic process;macromolecule modification;metabolic process;nitrogen compound metabolic process;organic substance metabolic process;organonitrogen compound metabolic process;post-translational protein modification;primary metabolic process;protein metabolic process;protein modification by small protein conjugation;protein modification by small protein conjugation or removal;prote…	actin binding;binding;cytoskeletal protein binding;protein binding	cellular anatomical entity;cytoplasmic vesicle;cytoskeleton;cytosol;early endosome;endosome;Golgi apparatus;intracellular membrane-bounded organelle;intracellular non-membrane-bounded organelle;intracellular organelle;intracellular vesicle;membrane-bounded organelle;microtubule;microtubule cytoskeleton;non-membrane-bounded organelle;nucleus;organelle;polymeric cytoskeletal fiber;postsynaptic dens…		0	1.48204	-0.409266	-3.28998	Q9BVN2;Q9BVN2-4;Q9BVN2-2;Q9BVN2-3	Q9BVN2	RUSC1_HUMAN	RUSC1	RUSC1	AP-4 complex accessory subunit RUSC1	8260.8	8564.67	7198.45	3	5248.67	6408.2	6465.2	3	RUSC1
Q9NVH0	Q9NVH0	EXD2_HUMAN	EXD2	EXD2	Exonuclease 3'-5' domain-containing protein 2	1.16964	0.0329745	0.227214	0.446396	27564.2	26064.4	24158.7	31893	29581.1	29508.8	14.7505	14.6698	14.5603	14.961	14.8524	14.8489	+	EtOH_Cnrtl	Cluster -224	cellular aromatic compound metabolic process;cellular metabolic process;cellular nitrogen compound metabolic process;cellular process;cellular response to stimulus;cellular response to stress;DNA damage response;DNA double-strand break processing;DNA metabolic process;DNA recombination;DNA repair;DNA-templated DNA replication maintenance of fidelity;double-strand break repair;double-strand break …	3'-5' exonuclease activity;3'-5'-DNA exonuclease activity;3'-5'-RNA exonuclease activity;binding;catalytic activity;catalytic activity, acting on a nucleic acid;catalytic activity, acting on DNA;catalytic activity, acting on RNA;cation binding;DNA exonuclease activity;DNA exonuclease activity, producing 5'-phosphomonoesters;DNA nuclease activity;exonuclease activity;exonuclease activity, active w…	bounding membrane of organelle;cellular anatomical entity;cytoplasm;cytoskeleton;intermediate filament cytoskeleton;intracellular membrane-bounded organelle;intracellular non-membrane-bounded organelle;intracellular organelle;intracellular organelle lumen;membrane;membrane-bounded organelle;membrane-enclosed lumen;mitochondrial matrix;mitochondrial membrane;mitochondrial outer membrane;mitochondr…		0	1.48182	0.227214	3.42812	Q9NVH0	Q9NVH0	EXD2_HUMAN	EXD2	EXD2	Exonuclease 3'-5' domain-containing protein 2	27564.2	26064.4	24158.7	3	31893	29581.1	29508.8	3	EXD2
Q9NQG5	Q9NQG5	RPR1B_HUMAN	RPRD1B	RPRD1B	Regulation of nuclear pre-mRNA domain-containing protein 1B	1.18792	0.033148	0.250248	0.524148	119708	122923	108179	143235	137072	136426	16.8692	16.9074	16.7231	17.128	17.0646	17.0578	+	EtOH_Cnrtl	Cluster -224	aromatic compound biosynthetic process;biological regulation;biosynthetic process;cellular aromatic compound metabolic process;cellular biosynthetic process;cellular metabolic process;cellular nitrogen compound biosynthetic process;cellular nitrogen compound metabolic process;cellular process;heterocycle biosynthetic process;heterocycle metabolic process;macromolecule biosynthetic process;macromo…	basal RNA polymerase II transcription machinery binding;basal transcription machinery binding;binding;enzyme binding;identical protein binding;protein binding;RNA polymerase binding;RNA polymerase core enzyme binding;RNA polymerase II C-terminal domain binding;RNA polymerase II complex binding	cellular anatomical entity;intracellular membrane-bounded organelle;intracellular organelle;membrane-bounded organelle;nucleoplasm;nucleus;organelle;protein-containing complex;protein-DNA complex;transcription preinitiation complex		0	1.47954	0.250248	4.13912	Q9NQG5	Q9NQG5	RPR1B_HUMAN	RPRD1B	RPRD1B	Regulation of nuclear pre-mRNA domain-containing protein 1B	119708	122923	108179	3	143235	137072	136426	3	RPRD1B
Q8WXG6-4;Q8WXG6-5;Q8WXG6-8	Q8WXG6-4	MADD_HUMAN	MADD	MADD	Isoform 4 of MAP kinase-activating death domain protein	1.34373	0.0337687	0.429899	1.13057	24628	19176.4	21232.3	31154.9	26176.2	30060.6	14.588	14.227	14.374	14.9272	14.676	14.8756	+	EtOH_Cnrtl	Cluster -224	biological regulation;cell surface receptor signaling pathway;cellular process;execution phase of apoptosis;positive regulation of biological process;positive regulation of cell communication;positive regulation of cellular process;positive regulation of intracellular signal transduction;positive regulation of MAPK cascade;positive regulation of response to stimulus;positive regulation of signal …	binding;cytokine receptor binding;death receptor binding;enzyme activator activity;enzyme regulator activity;GTPase regulator activity;guanyl-nucleotide exchange factor activity;kinase activator activity;kinase regulator activity;molecular function activator activity;molecular function regulator activity;nucleoside-triphosphatase regulator activity;protein binding;protein kinase activator activit…	axon;cell projection;cellular anatomical entity;cytoplasm;cytosol;membrane;neuron projection;plasma membrane;plasma membrane bounded cell projection		0	1.47149	0.429899	3.31176	Q8WXG6-4;Q8WXG6-5;Q8WXG6-8	Q8WXG6-4	MADD_HUMAN	MADD	MADD	Isoform 4 of MAP kinase-activating death domain protein	24628	19176.4	21232.3	3	31154.9	26176.2	30060.6	3	MADD
Q96S59	Q96S59	RANB9_HUMAN	RANBP9	RANBP9	Ran-binding protein 9	0.851616	0.0343418	-0.233368	1.10832	41330.3	42459.8	43092.8	35003.4	38610.3	34441.8	15.3349	15.3738	15.3952	15.0952	15.2367	15.0719	+	EtOH_Cnrtl	Cluster -223	biological regulation;cellular component assembly;cellular component organization;cellular component organization or biogenesis;cellular process;cytoskeleton organization;microtubule cytoskeleton organization;microtubule nucleation;microtubule-based process;negative regulation of biological process;negative regulation of cell communication;negative regulation of cellular process;negative regulati…	binding;enzyme binding;GTPase binding;protein binding;small GTPase binding	catalytic complex;cellular anatomical entity;cytoplasm;cytosol;intracellular membrane-bounded organelle;intracellular organelle;intracellular protein-containing complex;membrane;membrane-bounded organelle;microtubule associated complex;nuclear body;nucleoplasm;nucleus;organelle;plasma membrane;protein-containing complex;transferase complex;ubiquitin ligase complex		0	1.46418	-0.233368	-4.28737	Q96S59	Q96S59	RANB9_HUMAN	RANBP9	RANBP9	Ran-binding protein 9	41330.3	42459.8	43092.8	3	35003.4	38610.3	34441.8	3	RANBP9
Q5JTJ3;Q5JTJ3-2;Q5JTJ3-3	Q5JTJ3	COA6_HUMAN	COA6	COA6	Cytochrome c oxidase assembly factor 6 homolog	1.28296	0.0344658	0.357382	0.885786	317371	312003	273921	405947	411761	341181	18.2758	18.2512	18.0634	18.6309	18.6514	18.3802	+	EtOH_Cnrtl	Cluster -224	ATP synthesis coupled electron transport;cellular component assembly;cellular component organization;cellular component organization or biogenesis;cellular metabolic process;cellular process;cytochrome complex assembly;electron transport chain;generation of precursor metabolites and energy;metabolic process;mitochondrial ATP synthesis coupled electron transport;plasma membrane ATP synthesis coupl…	binding;cation binding;copper ion binding;ion binding;metal ion binding;nucleic acid binding;organic cyclic compound binding;RNA binding;transition metal ion binding	catalytic complex;cellular anatomical entity;cytochrome complex;intracellular membrane-bounded organelle;intracellular organelle;intracellular organelle lumen;membrane;membrane protein complex;membrane-bounded organelle;membrane-enclosed lumen;mitochondrial intermembrane space;mitochondrion;nucleoplasm;organelle;organelle envelope lumen;organelle lumen;plasma membrane;protein-containing complex;r…		0	1.46261	0.357382	3.24836	Q5JTJ3;Q5JTJ3-2;Q5JTJ3-3	Q5JTJ3	COA6_HUMAN	COA6	COA6	Cytochrome c oxidase assembly factor 6 homolog	317371	312003	273921	3	405947	411761	341181	3	COA6
P31942;P31942-2	P31942	HNRH3_HUMAN	HNRNPH3	HNRNPH3	Heterogeneous nuclear ribonucleoprotein H3	1.19959	0.0345709	0.262204	0.564508	488874	546077	554217	689702	606131	610516	18.8991	19.0587	19.0801	19.3956	19.2093	19.2197	+	EtOH_Cnrtl	Cluster -224	biological regulation;cell differentiation;cellular aromatic compound metabolic process;cellular developmental process;cellular metabolic process;cellular nitrogen compound metabolic process;cellular process;developmental process;epithelial cell differentiation;heterocycle metabolic process;macromolecule metabolic process;metabolic process;mRNA metabolic process;mRNA processing;mRNA splicing, via…	binding;nucleic acid binding;organic cyclic compound binding;RNA binding	cellular anatomical entity;intracellular membrane-bounded organelle;intracellular organelle;membrane-bounded organelle;nuclear protein-containing complex;nucleoplasm;nucleus;organelle;protein-containing complex;ribonucleoprotein complex;spliceosomal complex		0	1.46129	0.262204	3.15295	P31942;P31942-2	P31942	HNRH3_HUMAN	HNRNPH3	HNRNPH3	Heterogeneous nuclear ribonucleoprotein H3	488874	546077	554217	3	689702	606131	610516	3	HNRNPH3
Q96IR2	Q96IR2	ZN845_HUMAN	ZNF845	ZNF845	Zinc finger protein 845	1.51151	0.0348118	0.597707	1.69701	3289.06	3054.49	2385.22	3868.94	5184.17	4140.48	11.6835	11.5767	11.2199	11.9177	12.3399	12.0156	+	EtOH_Cnrtl	Cluster -224	biological regulation;regulation of biological process;regulation of biosynthetic process;regulation of cellular biosynthetic process;regulation of cellular metabolic process;regulation of cellular process;regulation of DNA-templated transcription;regulation of gene expression;regulation of macromolecule biosynthetic process;regulation of macromolecule metabolic process;regulation of metabolic pr…	binding;cation binding;cis-regulatory region sequence-specific DNA binding;DNA binding;DNA-binding transcription activator activity;DNA-binding transcription activator activity, RNA polymerase II-specific;DNA-binding transcription factor activity;DNA-binding transcription factor activity, RNA polymerase II-specific;double-stranded DNA binding;ion binding;metal ion binding;nucleic acid binding;org…	cellular anatomical entity;intracellular membrane-bounded organelle;intracellular organelle;membrane-bounded organelle;nucleus;organelle		0	1.45827	0.597707	3.15366	Q96IR2	Q96IR2	ZN845_HUMAN	ZNF845	ZNF845	Zinc finger protein 845	3289.06	3054.49	2385.22	3	3868.94	5184.17	4140.48	3	ZNF845
P35237	P35237	SPB6_HUMAN	SERPINB6	SERPINB6	Serpin B6	0.732995	0.0348925	-0.450848	1.84243	620709	510486	609492	423630	370707	481577	19.2436	18.9615	19.2172	18.6924	18.4999	18.8774	+	EtOH_Cnrtl	Cluster -223	biological regulation;cellular process;cellular response to abiotic stimulus;cellular response to chemical stimulus;cellular response to chemical stress;cellular response to environmental stimulus;cellular response to osmotic stress;cellular response to stimulus;cellular response to stress;multicellular organismal process;negative regulation of biological process;negative regulation of catalytic …	binding;endopeptidase inhibitor activity;endopeptidase regulator activity;enzyme binding;enzyme inhibitor activity;enzyme regulator activity;molecular function inhibitor activity;molecular function regulator activity;peptidase inhibitor activity;peptidase regulator activity;protease binding;protein binding;serine-type endopeptidase inhibitor activity	bounding membrane of organelle;cellular anatomical entity;collagen-containing extracellular matrix;cytoplasm;cytoplasmic vesicle membrane;cytosol;external encapsulating structure;extracellular exosome;extracellular matrix;extracellular membrane-bounded organelle;extracellular organelle;extracellular region;extracellular space;extracellular vesicle;ficolin-1-rich granule membrane;membrane;membrane…	Amoebiasis	0	1.45727	-0.450848	-3.19056	P35237	P35237	SPB6_HUMAN	SERPINB6	SERPINB6	Serpin B6	620709	510486	609492	3	423630	370707	481577	3	SERPINB6
Q86X76;Q86X76-2;Q86X76-4	Q86X76	NIT1_HUMAN	NIT1	NIT1	Deaminated glutathione amidase	1.09056	0.0351781	0.12459	0.0999837	189480	195324	189945	217269	202718	206811	17.5317	17.5755	17.5352	17.7291	17.6291	17.658	+	EtOH_Cnrtl	Cluster -224	amide catabolic process;amide metabolic process;catabolic process;metabolic process;nitrogen compound metabolic process	catalytic activity;deaminated glutathione amidase activity;hydrolase activity;hydrolase activity, acting on carbon-nitrogen (but not peptide) bonds;hydrolase activity, acting on carbon-nitrogen (but not peptide) bonds, in linear amides	cellular anatomical entity;cytoplasm;intracellular membrane-bounded organelle;intracellular organelle;membrane-bounded organelle;mitochondrion;nucleus;organelle		0	1.45373	0.12459	3.78975	Q86X76;Q86X76-2;Q86X76-4	Q86X76	NIT1_HUMAN	NIT1	NIT1	Deaminated glutathione amidase	189480	195324	189945	3	217269	202718	206811	3	NIT1
Q9Y2D5;Q9Y2D5-3;Q9Y2D5-5;Q9Y2D5-6;Q9Y2D5-7	Q9Y2D5	PLAK2_HUMAN	PALM2AKAP2	PALM2AKAP2	PALM2-AKAP2 fusion protein	1.16876	0.0356304	0.223472	0.433765	26926.3	26825.6	25268	33166.4	29524.2	29664.4	14.7167	14.7113	14.625	15.0174	14.8496	14.8564	+	EtOH_Cnrtl	Cluster -224	biological regulation;regulation of anatomical structure morphogenesis;regulation of biological process;regulation of biological quality;regulation of cell morphogenesis;regulation of cell shape;regulation of developmental process		cellular anatomical entity;membrane;plasma membrane		0	1.44818	0.223472	3.58311	Q9Y2D5;Q9Y2D5-3;Q9Y2D5-5;Q9Y2D5-6;Q9Y2D5-7	Q9Y2D5	PLAK2_HUMAN	PALM2AKAP2	PALM2AKAP2	PALM2-AKAP2 fusion protein	26926.3	26825.6	25268	3	33166.4	29524.2	29664.4	3	PALM2AKAP2
O60427	O60427	FADS1_HUMAN	FADS1	FADS1	Acyl-CoA (8-3)-desaturase	1.23968	0.0356706	0.309108	0.722833	19016.8	16472.5	16789.9	21201.5	23711.6	19896.2	14.215	14.0078	14.0353	14.3719	14.5333	14.2802	+	EtOH_Cnrtl	Cluster -224	alpha-linolenic acid metabolic process;biological regulation;biosynthetic process;carboxylic acid biosynthetic process;carboxylic acid metabolic process;cell communication;cell-cell signaling;cellular biosynthetic process;cellular lipid metabolic process;cellular metabolic process;cellular process;cellular response to external stimulus;cellular response to extracellular stimulus;cellular response…	acyl-CoA delta5-desaturase activity;acyl-CoA desaturase activity;C-5 sterol desaturase activity;catalytic activity;linoleoyl-CoA desaturase activity;omega-6 fatty acid desaturase activity;oxidoreductase activity;oxidoreductase activity, acting on paired donors, with incorporation or reduction of molecular oxygen;oxidoreductase activity, acting on paired donors, with oxidation of a pair of donors …	cellular anatomical entity;endoplasmic reticulum membrane;intracellular membrane-bounded organelle;intracellular organelle;membrane;membrane-bounded organelle;mitochondrion;organelle;organelle membrane	Biosynthesis of unsaturated fatty acids	0	1.44769	0.309108	3.13938	O60427	O60427	FADS1_HUMAN	FADS1	FADS1	Acyl-CoA (8-3)-desaturase	19016.8	16472.5	16789.9	3	21201.5	23711.6	19896.2	3	FADS1
O00217	O00217	NDUS8_HUMAN	NDUFS8	NDUFS8	NADH dehydrogenase [ubiquinone] iron-sulfur protein 8, mitochondrial	1.41722	0.0359527	0.510791	1.40362	282183	284589	219111	347874	364584	401314	18.1063	18.1185	17.7413	18.4082	18.4759	18.6144	+	EtOH_Cnrtl	Cluster -224	aerobic electron transport chain;aerobic respiration;aromatic compound biosynthetic process;ATP biosynthetic process;ATP metabolic process;biosynthetic process;carbohydrate derivative biosynthetic process;carbohydrate derivative metabolic process;cellular aromatic compound metabolic process;cellular biosynthetic process;cellular component assembly;cellular component organization;cellular componen…	4 iron, 4 sulfur cluster binding;active transmembrane transporter activity;binding;catalytic activity;cation binding;electron transfer activity;ion binding;iron-sulfur cluster binding;metal cluster binding;metal ion binding;NAD(P)H dehydrogenase (quinone) activity;NADH dehydrogenase (quinone) activity;NADH dehydrogenase (ubiquinone) activity;NADH dehydrogenase activity;oxidoreductase activity;oxi…	catalytic complex;cellular anatomical entity;inner mitochondrial membrane protein complex;intracellular membrane-bounded organelle;intracellular organelle;intracellular organelle lumen;membrane;membrane protein complex;membrane-bounded organelle;membrane-enclosed lumen;mitochondrial inner membrane;mitochondrial matrix;mitochondrial membrane;mitochondrial protein-containing complex;mitochondrial r…	Alzheimer's disease;Huntington's disease;Oxidative phosphorylation;Parkinson's disease	0	1.44427	0.510791	3.70616	O00217	O00217	NDUS8_HUMAN	NDUFS8	NDUFS8	NADH dehydrogenase [ubiquinone] iron-sulfur protein 8, mitochondrial	282183	284589	219111	3	347874	364584	401314	3	NDUFS8
Q5MNZ9;Q5MNZ9-2	Q5MNZ9	WIPI1_HUMAN	WIPI1	WIPI1	WD repeat domain phosphoinositide-interacting protein 1	1.31113	0.0364442	0.388002	0.989145	29666.7	34819.7	30291.8	36751.8	41140.1	46374.2	14.8566	15.0876	14.8866	15.1655	15.3283	15.501	+	EtOH_Cnrtl	Cluster -224	autophagosome assembly;autophagosome organization;autophagy;autophagy of mitochondrion;biological regulation;catabolic process;cell communication;cellular catabolic process;cellular component assembly;cellular component disassembly;cellular component organization;cellular component organization or biogenesis;cellular localization;cellular macromolecule localization;cellular metabolic process;cell…	anion binding;binding;DNA-binding transcription factor binding;ion binding;lipid binding;molecular adaptor activity;nuclear androgen receptor binding;nuclear estrogen receptor binding;nuclear receptor binding;phosphatidylinositol binding;phosphatidylinositol bisphosphate binding;phosphatidylinositol phosphate binding;phosphatidylinositol-3-phosphate binding;phosphatidylinositol-3,5-bisphosphate b…	autophagosome membrane;bounding membrane of organelle;cellular anatomical entity;clathrin-coated vesicle;coated vesicle;cytoplasm;cytoplasmic vesicle;cytoplasmic vesicle membrane;cytoskeleton;cytosol;endosome membrane;extrinsic component of membrane;Golgi apparatus subcompartment;Golgi membrane;intracellular membrane-bounded organelle;intracellular non-membrane-bounded organelle;intracellular org…		0	1.43837	0.388002	3.20636	Q5MNZ9;Q5MNZ9-2	Q5MNZ9	WIPI1_HUMAN	WIPI1	WIPI1	WD repeat domain phosphoinositide-interacting protein 1	29666.7	34819.7	30291.8	3	36751.8	41140.1	46374.2	3	WIPI1
Q16698;Q16698-2	Q16698	DECR_HUMAN	DECR1	DECR1	2,4-dienoyl-CoA reductase [(3E)-enoyl-CoA-producing], mitochondrial	1.1314	0.0364452	0.178593	0.282275	135855	132784	122797	151830	140546	150494	17.0517	17.0187	16.9059	17.2121	17.1007	17.1993	+	EtOH_Cnrtl	Cluster -224	biological regulation;carboxylic acid catabolic process;carboxylic acid metabolic process;catabolic process;cellular catabolic process;cellular lipid catabolic process;cellular lipid metabolic process;cellular metabolic process;cellular process;fatty acid beta-oxidation;fatty acid catabolic process;fatty acid metabolic process;fatty acid oxidation;lipid catabolic process;lipid metabolic process;l…	2,4-dienoyl-CoA reductase (NADPH) activity;adenyl nucleotide binding;anion binding;binding;catalytic activity;heterocyclic compound binding;identical protein binding;ion binding;NADP binding;NADPH binding;nucleoside phosphate binding;nucleotide binding;organic cyclic compound binding;oxidoreductase activity;oxidoreductase activity, acting on the CH-CH group of donors;oxidoreductase activity, acti…	catalytic complex;cellular anatomical entity;cytosol;intracellular membrane-bounded organelle;intracellular organelle;intracellular organelle lumen;membrane-bounded organelle;membrane-enclosed lumen;mitochondrial matrix;mitochondrion;nucleoplasm;nucleus;organelle;organelle lumen;protein-containing complex		0	1.43836	0.178593	3.1632	Q16698;Q16698-2	Q16698	DECR_HUMAN	DECR1	DECR1	2,4-dienoyl-CoA reductase [(3E)-enoyl-CoA-producing], mitochondrial	135855	132784	122797	3	151830	140546	150494	3	DECR1
Q9NWS6	Q9NWS6	F118A_HUMAN	FAM118A	FAM118A	Protein FAM118A	0.74928	0.0366905	-0.417015	1.72823	10540.3	10203.4	12543.8	8387.97	9243.22	7310.45	13.3636	13.3168	13.6147	13.0341	13.1742	12.8357	+	EtOH_Cnrtl	Cluster -223		binding;identical protein binding;protein binding	cellular anatomical entity;membrane		0	1.43545	-0.417015	-3.09163	Q9NWS6	Q9NWS6	F118A_HUMAN	FAM118A	FAM118A	Protein FAM118A	10540.3	10203.4	12543.8	3	8387.97	9243.22	7310.45	3	FAM118A
Q14872	Q14872	MTF1_HUMAN	MTF1	MTF1	Metal regulatory transcription factor 1	4.64197	0.0368094	2.41241	7.82263	1637.69	1473.73	4740.86	9544.66	13131.4	13774	10.6774	10.5253	12.2109	13.2205	13.6807	13.7497	+	EtOH_Cnrtl	Cluster -224	anatomical structure development;anatomical structure homeostasis;aromatic compound biosynthetic process;biological regulation;biosynthetic process;cartilage homeostasis;cellular aromatic compound metabolic process;cellular biosynthetic process;cellular metabolic process;cellular nitrogen compound biosynthetic process;cellular nitrogen compound metabolic process;cellular process;cellular response…	binding;cation binding;cis-regulatory region sequence-specific DNA binding;DNA binding;DNA-binding transcription activator activity;DNA-binding transcription activator activity, RNA polymerase II-specific;DNA-binding transcription factor activity;DNA-binding transcription factor activity, RNA polymerase II-specific;double-stranded DNA binding;enzyme binding;histone acetyltransferase binding;ion b…	cellular anatomical entity;cytoplasm;intracellular membrane-bounded organelle;intracellular organelle;membrane-bounded organelle;nucleoplasm;nucleus;organelle		3	1.43404	2.41241	4.28213	Q14872	Q14872	MTF1_HUMAN	MTF1	MTF1	Metal regulatory transcription factor 1				0	9544.66	13131.4	13774	3	MTF1
Q7Z794	Q7Z794	K2C1B_HUMAN	KRT77	KRT77	Keratin, type II cytoskeletal 1b	0.0990689	0.0371645	-3.54437	12.2848	21398	93016.9	118477	17181.3	3129.35	2761.69	14.3852	16.5052	16.8542	14.0686	11.6116	11.4313	+	EtOH_Cnrtl	Cluster -223	cellular component organization;cellular component organization or biogenesis;cellular process;cytoskeleton organization;intermediate filament cytoskeleton organization;intermediate filament organization;intermediate filament-based process;keratinization;multicellular organismal process;organelle organization;supramolecular fiber organization	structural constituent of skin epidermis;structural molecule activity	cellular anatomical entity;cornified envelope;cytoskeleton;cytosol;extracellular exosome;extracellular membrane-bounded organelle;extracellular organelle;extracellular vesicle;intermediate filament;intracellular non-membrane-bounded organelle;intracellular organelle;keratin filament;membrane;membrane-bounded organelle;non-membrane-bounded organelle;organelle;plasma membrane;polymeric cytoskeletal…		0	1.42987	-3.54437	-3.08651	Q7Z794	Q7Z794	K2C1B_HUMAN	KRT77	KRT77	Keratin, type II cytoskeletal 1b	21398	93016.9	118477	3	17181.3	3129.35	2761.69	3	KRT77
Q6P4F2	Q6P4F2	FDX2_HUMAN	FDX2	FDX2	Ferredoxin-2, mitochondrial	1.21985	0.0373715	0.289282	0.655908	57038.8	51997	47975.3	67248.7	61736.2	62544.6	15.7997	15.6661	15.55	16.0372	15.9138	15.9326	+	EtOH_Cnrtl	Cluster -224	[2Fe-2S] cluster assembly;[4Fe-4S] cluster assembly;cellular component assembly;cellular component organization;cellular component organization or biogenesis;cellular metabolic process;cellular process;electron transport chain;generation of precursor metabolites and energy;iron-sulfur cluster assembly;metabolic process;metallo-sulfur cluster assembly;P450-containing electron transport chain;sulfu…	2 iron, 2 sulfur cluster binding;binding;catalytic activity;cation binding;electron transfer activity;ion binding;iron-sulfur cluster binding;metal cluster binding;metal ion binding;oxidoreductase activity	cellular anatomical entity;intracellular membrane-bounded organelle;intracellular organelle;intracellular organelle lumen;iron-sulfur cluster assembly complex;membrane-bounded organelle;membrane-enclosed lumen;mitochondrial matrix;mitochondrion;organelle;organelle lumen;protein-containing complex		0	1.42746	0.289282	3.54056	Q6P4F2	Q6P4F2	FDX2_HUMAN	FDX2	FDX2	Ferredoxin-2, mitochondrial	57038.8	51997	47975.3	3	67248.7	61736.2	62544.6	3	FDX2
Q8IY81	Q8IY81	SPB1_HUMAN	FTSJ3	FTSJ3	pre-rRNA 2'-O-ribose RNA methyltransferase FTSJ3	1.29253	0.0374922	0.374547	0.943726	23894.6	27763.6	22265.3	32110	33658.1	29780	14.5444	14.7609	14.4425	14.9707	15.0387	14.8621	+	EtOH_Cnrtl	Cluster -224	cellular aromatic compound metabolic process;cellular metabolic process;cellular nitrogen compound metabolic process;cellular process;heterocycle metabolic process;macromolecule metabolic process;macromolecule methylation;macromolecule modification;maturation of 5.8S rRNA;maturation of 5.8S rRNA from tricistronic rRNA transcript (SSU-rRNA, 5.8S rRNA, LSU-rRNA);maturation of LSU-rRNA;maturation of…	binding;catalytic activity;catalytic activity, acting on a nucleic acid;catalytic activity, acting on a rRNA;catalytic activity, acting on RNA;methyltransferase activity;nucleic acid binding;O-methyltransferase activity;organic cyclic compound binding;RNA 2'-O-methyltransferase activity;RNA binding;RNA methyltransferase activity;rRNA (guanine) methyltransferase activity;rRNA (uridine-2'-O-)-methy…	cellular anatomical entity;chromosome;intracellular non-membrane-bounded organelle;intracellular organelle;non-membrane-bounded organelle;nucleolus;nucleoplasm;organelle;preribosome;preribosome, large subunit precursor;preribosome, small subunit precursor;protein-containing complex;ribonucleoprotein complex		0	1.42606	0.374547	3.499	Q8IY81	Q8IY81	SPB1_HUMAN	FTSJ3	FTSJ3	pre-rRNA 2'-O-ribose RNA methyltransferase FTSJ3	23894.6	27763.6	22265.3	3	32110	33658.1	29780	3	FTSJ3
Q96L92	Q96L92	SNX27_HUMAN	SNX27	SNX27	Sorting nexin-27	1.06181	0.0375387	0.0867513	0.0277423	161478	156319	154746	167922	167476	166352	17.301	17.2541	17.2395	17.3574	17.3536	17.3439	+	EtOH_Cnrtl	Cluster -224	biological regulation;cellular localization;cellular macromolecule localization;cellular process;endocytic recycling;endosomal transport;endosome to lysosome transport;establishment of cell polarity;establishment of localization;establishment of localization in cell;establishment of lymphocyte polarity;establishment of natural killer cell polarity;establishment of protein localization;establishme…	binding;lipid binding;phosphatidylinositol binding;phosphatidylinositol phosphate binding;phosphatidylinositol-3-phosphate binding;phospholipid binding	bounding membrane of organelle;cell junction;cellular anatomical entity;cytoplasmic vesicle;cytoplasmic vesicle membrane;cytosol;early endosome;early endosome membrane;endosome;endosome membrane;glutamatergic synapse;immunological synapse;intracellular membrane-bounded organelle;intracellular organelle;intracellular vesicle;membrane;membrane-bounded organelle;organelle;organelle membrane;Schaffer…		0	1.42552	0.0867513	4.57417	Q96L92	Q96L92	SNX27_HUMAN	SNX27	SNX27	Sorting nexin-27	161478	156319	154746	3	167922	167476	166352	3	SNX27
Q14966	Q14966	ZN638_HUMAN	ZNF638	ZNF638	Zinc finger protein 638	1.12157	0.037598	0.166334	0.240891	42185.7	45705.8	41636.2	47759.8	50080.8	47433.8	15.3645	15.4801	15.3456	15.5435	15.612	15.5336	+	EtOH_Cnrtl	Cluster -224	biological regulation;cellular aromatic compound metabolic process;cellular metabolic process;cellular nitrogen compound metabolic process;cellular process;heterocycle metabolic process;macromolecule metabolic process;metabolic process;nitrogen compound metabolic process;nucleic acid metabolic process;nucleobase-containing compound metabolic process;organic cyclic compound metabolic process;organ…	binding;cation binding;DNA binding;double-stranded DNA binding;ion binding;metal ion binding;mRNA binding;nucleic acid binding;organic cyclic compound binding;RNA binding;transition metal ion binding;zinc ion binding	cellular anatomical entity;cytoplasm;intracellular membrane-bounded organelle;intracellular organelle;membrane-bounded organelle;nuclear body;nuclear speck;nucleoplasm;nucleus;organelle		0	1.42484	0.166334	3.41313	Q14966	Q14966	ZN638_HUMAN	ZNF638	ZNF638	Zinc finger protein 638	42185.7	45705.8	41636.2	3	47759.8	50080.8	47433.8	3	ZNF638
Q99504;Q99504-3;Q99504-4;Q99504-5	Q99504	EYA3_HUMAN	EYA3	EYA3	Eyes absent homolog 3	0.795906	0.0379886	-0.328079	1.42802	12291.7	10825.5	13112.6	9353.3	8971.73	10510.5	13.5854	13.4021	13.6787	13.1913	13.1312	13.3595	+	EtOH_Cnrtl	Cluster -223	anatomical structure development;anatomical structure morphogenesis;biological regulation;cell differentiation;cellular aromatic compound metabolic process;cellular developmental process;cellular metabolic process;cellular nitrogen compound metabolic process;cellular process;cellular response to stimulus;cellular response to stress;developmental process;DNA damage response;DNA metabolic process;D…	binding;catalytic activity;catalytic activity, acting on a protein;cation binding;histone H2AXY142 phosphatase activity;histone modifying activity;histone phosphatase activity;hydrolase activity;hydrolase activity, acting on ester bonds;ion binding;metal ion binding;phosphatase activity;phosphoprotein phosphatase activity;phosphoric ester hydrolase activity;protein tyrosine phosphatase activity	cellular anatomical entity;centrosome;cytoplasm;intracellular membrane-bounded organelle;intracellular organelle;membrane-bounded organelle;microtubule organizing center;nucleoplasm;nucleus;organelle		0	1.42035	-0.328079	-3.09065	Q99504;Q99504-3;Q99504-4;Q99504-5	Q99504	EYA3_HUMAN	EYA3	EYA3	Eyes absent homolog 3	12291.7	10825.5	13112.6	3	9353.3	8971.73	10510.5	3	EYA3
Q99487	Q99487	PAFA2_HUMAN	PAFAH2	PAFAH2	Platelet-activating factor acetylhydrolase 2, cytoplasmic	1.15805	0.0380419	0.212965	0.398299	10756.9	10964.2	12143.7	12546.9	13609.4	13060.7	13.393	13.4205	13.5679	13.615	13.7323	13.6729	+	EtOH_Cnrtl	Cluster -224	biological regulation;blood coagulation;catabolic process;coagulation;hemostasis;lipid catabolic process;lipid metabolic process;metabolic process;multicellular organismal process;organic substance catabolic process;organic substance metabolic process;primary metabolic process;regulation of biological quality;regulation of body fluid levels	1-alkyl-2-acetylglycerophosphocholine esterase activity;acetyltransferase activity;acyltransferase activity;acyltransferase activity, transferring groups other than amino-acyl groups;binding;carboxylic ester hydrolase activity;catalytic activity;hydrolase activity;hydrolase activity, acting on ester bonds;lipid binding;phospholipid binding;platelet-activating factor acetyltransferase activity;tra…	cellular anatomical entity;cytoplasm;endoplasmic reticulum membrane;membrane;organelle membrane	Ether lipid metabolism	0	1.41974	0.212965	3.32768	Q99487	Q99487	PAFA2_HUMAN	PAFAH2	PAFAH2	Platelet-activating factor acetylhydrolase 2, cytoplasmic	10756.9	10964.2	12143.7	3	12546.9	13609.4	13060.7	3	PAFAH2
O14495	O14495	PLPP3_HUMAN	PLPP3	PLPP3	Phospholipid phosphatase 3	1.30399	0.0381276	0.385324	0.980105	3905.94	4656.29	4868.91	5310.55	5828.98	6374.53	11.9315	12.185	12.2494	12.3746	12.509	12.6381	+	EtOH_Cnrtl	Cluster -224	alcohol metabolic process;amide metabolic process;anatomical structure development;anatomical structure morphogenesis;astrocyte differentiation;Bergmann glial cell differentiation;biological regulation;biosynthetic process;blood vessel development;cell adhesion;cell adhesion mediated by integrin;cell differentiation;cell surface receptor signaling pathway;cell-cell adhesion;cell-cell adhesion med…	binding;catalytic activity;cell adhesion molecule binding;ceramide-1-phosphate phosphatase activity;hydrolase activity;hydrolase activity, acting on ester bonds;integrin binding;lipid phosphatase activity;phosphatase activity;phosphatidate phosphatase activity;phosphoric ester hydrolase activity;protein binding;protein-containing complex binding;signaling receptor binding;sphingosine-1-phosphate …	adherens junction;anchoring junction;basolateral plasma membrane;bounding membrane of organelle;cell junction;cell-cell junction;cellular anatomical entity;endoplasmic reticulum exit site;endoplasmic reticulum membrane;endoplasmic reticulum-Golgi intermediate compartment membrane;Golgi apparatus;Golgi apparatus subcompartment;Golgi membrane;intracellular membrane-bounded organelle;intracellular o…	Ether lipid metabolism;Fat digestion and absorption;Fc gamma R-mediated phagocytosis;Glycerolipid metabolism;Glycerophospholipid metabolism;Sphingolipid metabolism	1	1.41876	0.385324	3.12524	O14495	O14495	PLPP3_HUMAN	PLPP3	PLPP3	Phospholipid phosphatase 3	3905.94	4656.29	4868.91	3	5310.55		6374.53	2	PLPP3
Q9Y2U8	Q9Y2U8	MAN1_HUMAN	LEMD3	LEMD3	Inner nuclear membrane protein Man1	1.12005	0.0381314	0.164455	0.23455	30823.3	29966.9	28086.8	33066.9	33906.1	32573.9	14.9117	14.8711	14.7776	15.0131	15.0493	14.9914	+	EtOH_Cnrtl	Cluster -224	biological regulation;negative regulation of activin receptor signaling pathway;negative regulation of biological process;negative regulation of BMP signaling pathway;negative regulation of cell communication;negative regulation of cellular process;negative regulation of cellular response to growth factor stimulus;negative regulation of response to stimulus;negative regulation of signal transduct…	binding;DNA binding;nucleic acid binding;organic cyclic compound binding;protein-containing complex binding;ribonucleoprotein complex binding;snRNP binding;U1 snRNP binding	cellular anatomical entity;membrane;nuclear inner membrane;nuclear membrane;organelle inner membrane;organelle membrane		0	1.41872	0.164455	3.81196	Q9Y2U8	Q9Y2U8	MAN1_HUMAN	LEMD3	LEMD3	Inner nuclear membrane protein Man1	30823.3	29966.9	28086.8	3	33066.9	33906.1	32573.9	3	LEMD3
O60885	O60885	BRD4_HUMAN	BRD4	BRD4	Bromodomain-containing protein 4	1.20294	0.0381522	0.268923	0.587186	109210	110627	96106	128756	129337	121968	16.7367	16.7553	16.5523	16.9743	16.9808	16.8961	+	EtOH_Cnrtl	Cluster -224	biological process involved in interaction with symbiont;biological process involved in interspecies interaction between organisms;biological process involved in symbiotic interaction;biological regulation;cellular component organization;cellular component organization or biogenesis;cellular process;cellular response to stimulus;cellular response to stress;chromatin organization;chromatin remodel…	acetylation-dependent protein binding;basal RNA polymerase II transcription machinery binding;basal transcription machinery binding;binding;catalytic activity;catalytic activity, acting on a protein;chromatin binding;chromatin-protein adaptor activity;DNA binding;double-stranded DNA binding;enzyme binding;histone binding;histone reader activity;kinase activity;lysine-acetylated histone binding;mo…	cellular anatomical entity;chromosome;condensed chromosome;condensed nuclear chromosome;intracellular membrane-bounded organelle;intracellular non-membrane-bounded organelle;intracellular organelle;membrane-bounded organelle;non-membrane-bounded organelle;nuclear chromosome;nucleoplasm;nucleus;organelle		0	1.41848	0.268923	3.82719	O60885	O60885	BRD4_HUMAN	BRD4	BRD4	Bromodomain-containing protein 4	109210	110627	96106.1	3	128756	129337	121968	3	BRD4
Q86UV5	Q86UV5	UBP48_HUMAN	USP48	USP48	Ubiquitin carboxyl-terminal hydrolase 48	1.23563	0.0382292	0.307277	0.716652	10984.9	11653.5	13202.6	13640.3	15092.7	15553.2	13.4232	13.5085	13.6885	13.7356	13.8816	13.9249	+	EtOH_Cnrtl	Cluster -224	macromolecule metabolic process;metabolic process;nitrogen compound metabolic process;organic substance metabolic process;organonitrogen compound metabolic process;primary metabolic process;protein metabolic process;proteolysis	catalytic activity;catalytic activity, acting on a protein;cysteine-type deubiquitinase activity;cysteine-type endopeptidase activity;cysteine-type peptidase activity;deubiquitinase activity;endopeptidase activity;hydrolase activity;peptidase activity;ubiquitin-like protein peptidase activity	cellular anatomical entity;cytosol;intracellular membrane-bounded organelle;intracellular organelle;membrane-bounded organelle;mitochondrion;nucleoplasm;nucleus;organelle		0	1.4176	0.307277	3.17017	Q86UV5	Q86UV5	UBP48_HUMAN	USP48	USP48	Ubiquitin carboxyl-terminal hydrolase 48	10984.9	11653.5	13202.6	3	13640.3	15092.7	15553.2	3	USP48
O15118	O15118	NPC1_HUMAN	NPC1	NPC1	NPC intracellular cholesterol transporter 1	1.21831	0.0384391	0.287434	0.64967	261968	273567	236174	309881	310309	319988	17.999	18.0615	17.8495	18.2414	18.2433	18.2877	+	EtOH_Cnrtl	Cluster -224	adult behavior;adult locomotory behavior;adult walking behavior;alcohol metabolic process;anatomical structure development;animal organ development;autophagy;behavior;bile acid metabolic process;biological process involved in interaction with host;biological process involved in interspecies interaction between organisms;biological process involved in symbiotic interaction;biological regulation;bi…	alcohol binding;binding;cholesterol binding;exogenous protein binding;lipid binding;lipid transporter activity;molecular transducer activity;organic cyclic compound binding;protein binding;signaling receptor activity;small molecule binding;steroid binding;sterol binding;sterol transporter activity;transmembrane signaling receptor activity;transporter activity;virus receptor activity	bounding membrane of organelle;cellular anatomical entity;cytoplasmic vesicle membrane;endoplasmic reticulum;endosome membrane;envelope;extracellular exosome;extracellular membrane-bounded organelle;extracellular organelle;extracellular region;extracellular vesicle;Golgi apparatus;intracellular membrane-bounded organelle;intracellular organelle;late endosome membrane;lysosomal membrane;lysosome;l…	Lysosome	0	1.41523	0.287434	4.44275	O15118	O15118	NPC1_HUMAN	NPC1	NPC1	NPC intracellular cholesterol transporter 1	261968	273567	236174	3	309881	310309	319988	3	NPC1
O75971	O75971	SNPC5_HUMAN	SNAPC5	SNAPC5	snRNA-activating protein complex subunit 5	1.2612	0.0387511	0.333514	0.805216	16169.3	14989.4	13665.1	19565.3	20200.9	16765.8	13.981	13.8717	13.7382	14.256	14.3021	14.0332	+	EtOH_Cnrtl	Cluster -224	aromatic compound biosynthetic process;biosynthetic process;cellular aromatic compound metabolic process;cellular biosynthetic process;cellular metabolic process;cellular nitrogen compound biosynthetic process;cellular nitrogen compound metabolic process;cellular process;DNA-templated transcription;DNA-templated transcription initiation;heterocycle biosynthetic process;heterocycle metabolic proce…	general transcription initiation factor activity;RNA polymerase II general transcription initiation factor activity;RNA polymerase III general transcription initiation factor activity	cellular anatomical entity;intracellular membrane-bounded organelle;intracellular non-membrane-bounded organelle;intracellular organelle;membrane-bounded organelle;non-membrane-bounded organelle;nuclear body;nucleolus;nucleoplasm;nucleus;organelle		0	1.41172	0.333514	3.0677	O75971	O75971	SNPC5_HUMAN	SNAPC5	SNAPC5	snRNA-activating protein complex subunit 5	16169.3	14989.4	13665.1	3	19565.3	20200.9	16765.8	3	SNAPC5
Q53TN4;Q53TN4-3	Q53TN4	CYBR1_HUMAN	CYBRD1	CYBRD1	Plasma membrane ascorbate-dependent reductase CYBRD1	1.1345	0.0392268	0.181315	0.291462	17888.4	19279.5	19049.2	21067	22541.2	20170.1	14.1267	14.2348	14.2174	14.3627	14.4603	14.2999	+	EtOH_Cnrtl	Cluster -224	ascorbate homeostasis;cellular homeostasis;chemical homeostasis;establishment of localization;establishment of localization in cell;homeostatic process;inorganic ion homeostasis;intracellular chemical homeostasis;intracellular iron ion homeostasis;intracellular monoatomic cation homeostasis;intracellular monoatomic ion homeostasis;iron import into cell;iron ion transport;localization;metal ion tr…	active transmembrane transporter activity;binding;catalytic activity;cation binding;identical protein binding;ion binding;metal ion binding;oxidoreductase activity;oxidoreductase activity, acting on metal ions;oxidoreduction-driven active transmembrane transporter activity;primary active transmembrane transporter activity;protein binding;transmembrane ascorbate ferrireductase activity;transmembra…	apical plasma membrane;bounding membrane of organelle;brush border membrane;cell projection membrane;cellular anatomical entity;extracellular exosome;extracellular membrane-bounded organelle;extracellular organelle;extracellular vesicle;lysosomal membrane;lytic vacuole membrane;membrane;membrane-bounded organelle;organelle;organelle membrane;plasma membrane;plasma membrane region;vacuolar membran…	Mineral absorption	0	1.40642	0.181315	3.15699	Q53TN4;Q53TN4-3	Q53TN4	CYBR1_HUMAN	CYBRD1	CYBRD1	Plasma membrane ascorbate-dependent reductase CYBRD1	17888.4	19279.5	19049.2	3	21067	22541.2	20170.1	3	CYBRD1
O14907	O14907	TX1B3_HUMAN	TAX1BP3	TAX1BP3	Tax1-binding protein 3	0.921045	0.0395703	-0.118186	0.719519	96608.3	94809.5	101577	88757.4	91713.1	89390.7	16.5599	16.5327	16.6322	16.4376	16.4848	16.4478	+	EtOH_Cnrtl	Cluster -223	activation of GTPase activity;biological regulation;cell surface receptor signaling pathway;cellular process;intracellular signal transduction;macromolecule metabolic process;metabolic process;negative regulation of biological process;negative regulation of cell communication;negative regulation of cell population proliferation;negative regulation of cellular process;negative regulation of protei…	beta-catenin binding;binding;protein binding	actin cytoskeleton;cellular anatomical entity;cytoplasm;cytoskeleton;cytosol;extracellular exosome;extracellular membrane-bounded organelle;extracellular organelle;extracellular vesicle;fibrillar center;intracellular membrane-bounded organelle;intracellular non-membrane-bounded organelle;intracellular organelle;membrane;membrane-bounded organelle;non-membrane-bounded organelle;organelle;plasma me…		0	1.40263	-0.118186	-3.58409	O14907	O14907	TX1B3_HUMAN	TAX1BP3	TAX1BP3	Tax1-binding protein 3	96608.3	94809.5	101577	3	88757.4	91713.1	89390.8	3	TAX1BP3
P35610	P35610	SOAT1_HUMAN	SOAT1	SOAT1	Sterol O-acyltransferase 1	1.21132	0.0401357	0.277912	0.617528	163649	180347	152138	206226	209660	185089	17.3202	17.4604	17.215	17.6539	17.6777	17.4979	+	EtOH_Cnrtl	Cluster -224	alcohol metabolic process;biological regulation;cell differentiation;cellular component assembly;cellular component organization;cellular component organization or biogenesis;cellular developmental process;cellular process;chemical homeostasis;cholesterol efflux;cholesterol homeostasis;cholesterol metabolic process;cholesterol storage;cholesterol transport;developmental process;establishment of l…	acyl-CoA binding;acyltransferase activity;acyltransferase activity, transferring groups other than amino-acyl groups;adenyl nucleotide binding;adenyl ribonucleotide binding;alcohol binding;amide binding;anion binding;binding;carbohydrate derivative binding;catalytic activity;cholesterol binding;cholesterol O-acyltransferase activity;fatty acid derivative binding;fatty-acyl-CoA binding;heterocycli…	cellular anatomical entity;endoplasmic reticulum;endoplasmic reticulum membrane;intracellular membrane-bounded organelle;intracellular organelle;membrane;membrane-bounded organelle;organelle;organelle membrane	Steroid biosynthesis	0	1.39647	0.277912	3.06296	P35610	P35610	SOAT1_HUMAN	SOAT1	SOAT1	Sterol O-acyltransferase 1	163649	180347	152138	3	206226	209660	185089	3	SOAT1
Q9NZL4;Q9NZL4-3	Q9NZL4	HPBP1_HUMAN	HSPBP1	HSPBP1	Hsp70-binding protein 1	0.776862	0.040333	-0.367682	1.5617	48107	41311.1	43363.5	30437.3	34405.9	38309.8	15.554	15.3342	15.4042	14.8936	15.0704	15.2254	+	EtOH_Cnrtl	Cluster -223	biological regulation;cellular process;positive regulation of biological process;positive regulation of catabolic process;positive regulation of macromolecule metabolic process;positive regulation of metabolic process;positive regulation of nitrogen compound metabolic process;positive regulation of post-translational protein modification;positive regulation of proteasomal protein catabolic proces…	adenyl nucleotide binding;adenyl-nucleotide exchange factor activity;ATPase regulator activity;binding;enzyme binding;enzyme inhibitor activity;enzyme regulator activity;heterocyclic compound binding;molecular function inhibitor activity;molecular function regulator activity;molecular sequestering activity;nucleoside phosphate binding;nucleotide binding;organic cyclic compound binding;protein bin…	cellular anatomical entity;endoplasmic reticulum;extracellular space;intracellular membrane-bounded organelle;intracellular organelle;membrane-bounded organelle;organelle	Protein processing in endoplasmic reticulum	0	1.39434	-0.367682	-3.17732	Q9NZL4;Q9NZL4-3	Q9NZL4	HPBP1_HUMAN	HSPBP1	HSPBP1	Hsp70-binding protein 1	48107	41311.1	43363.5	3	30437.3	34405.9	38309.8	3	HSPBP1
O00116	O00116	ADAS_HUMAN	AGPS	AGPS	Alkyldihydroxyacetonephosphate synthase, peroxisomal	1.10807	0.0409885	0.147515	0.177369	56507.6	60230.8	58467	67110.6	61387.1	65642.9	15.7862	15.8782	15.8353	16.0343	15.9056	16.0024	+	EtOH_Cnrtl	Cluster -224	biosynthetic process;cellular biosynthetic process;cellular lipid biosynthetic process;cellular lipid metabolic process;cellular metabolic process;cellular process;ether biosynthetic process;ether lipid biosynthetic process;ether lipid metabolic process;ether metabolic process;glycerol ether biosynthetic process;glycerol ether metabolic process;lipid biosynthetic process;lipid metabolic process;m…	alkylglycerone-phosphate synthase activity;anion binding;binding;catalytic activity;FAD binding;flavin adenine dinucleotide binding;heterocyclic compound binding;ion binding;nucleoside phosphate binding;nucleotide binding;organic cyclic compound binding;small molecule binding;transferase activity;transferase activity, transferring alkyl or aryl (other than methyl) groups	bounding membrane of organelle;cellular anatomical entity;cytosol;intracellular membrane-bounded organelle;intracellular organelle;intracellular organelle lumen;membrane;membrane-bounded organelle;membrane-enclosed lumen;microbody;microbody lumen;microbody membrane;mitochondrion;organelle;organelle lumen;organelle membrane;peroxisomal matrix;peroxisomal membrane;peroxisome	Ether lipid metabolism;Peroxisome	0	1.38734	0.147515	3.14347	O00116	O00116	ADAS_HUMAN	AGPS	AGPS	Alkyldihydroxyacetonephosphate synthase, peroxisomal	56507.6	60230.8	58467	3	67110.6	61387.1	65642.9	3	AGPS
Q6Y1H2	Q6Y1H2	HACD2_HUMAN	HACD2	HACD2	Very-long-chain (3R)-3-hydroxyacyl-CoA dehydratase 2	1.58602	0.041013	0.681564	1.98008	16679.7	11407.1	13287.9	23033.4	20547.9	22039.8	14.0258	13.4776	13.6978	14.4914	14.3267	14.4278	+	EtOH_Cnrtl	Cluster -224	acyl-CoA biosynthetic process;acyl-CoA metabolic process;amide biosynthetic process;amide metabolic process;aromatic compound biosynthetic process;biosynthetic process;carbohydrate derivative biosynthetic process;carbohydrate derivative metabolic process;carboxylic acid biosynthetic process;carboxylic acid metabolic process;cellular aromatic compound metabolic process;cellular biosynthetic proces…	3-hydroxyacyl-CoA dehydratase activity;binding;carbon-oxygen lyase activity;catalytic activity;enoyl-CoA hydratase activity;enzyme binding;hydro-lyase activity;lyase activity;protein binding	cellular anatomical entity;endoplasmic reticulum;endoplasmic reticulum membrane;intracellular membrane-bounded organelle;intracellular organelle;membrane;membrane-bounded organelle;organelle;organelle membrane	Biosynthesis of unsaturated fatty acids	0	1.38708	0.681564	4.09782	Q6Y1H2	Q6Y1H2	HACD2_HUMAN	HACD2	HACD2	Very-long-chain (3R)-3-hydroxyacyl-CoA dehydratase 2	16679.7	11407.1	13287.9	3	23033.4	20547.9	22039.8	3	HACD2
Q9BSV6	Q9BSV6	SEN34_HUMAN	TSEN34	TSEN34	tRNA-splicing endonuclease subunit Sen34	1.31754	0.0410152	0.40368	1.04207	5236.02	5547.38	6609.41	7300.32	7523.8	8091.56	12.3543	12.4376	12.6903	12.8337	12.8772	12.9822	+	EtOH_Cnrtl	Cluster -224	cellular aromatic compound metabolic process;cellular metabolic process;cellular nitrogen compound metabolic process;cellular process;heterocycle metabolic process;macromolecule metabolic process;metabolic process;mRNA metabolic process;mRNA processing;ncRNA metabolic process;ncRNA processing;nitrogen compound metabolic process;nucleic acid metabolic process;nucleobase-containing compound metabol…	binding;catalytic activity;catalytic activity, acting on a nucleic acid;catalytic activity, acting on a tRNA;catalytic activity, acting on RNA;endonuclease activity;endonuclease activity, active with either ribo- or deoxyribonucleic acids and producing 3'-phosphomonoesters;hydrolase activity;hydrolase activity, acting on ester bonds;lyase activity;nuclease activity;nucleic acid binding;organic cy…	catalytic complex;cellular anatomical entity;endonuclease complex;endoribonuclease complex;intracellular non-membrane-bounded organelle;intracellular organelle;intracellular protein-containing complex;non-membrane-bounded organelle;nuclear protein-containing complex;nucleolus;nucleoplasm;organelle;protein-containing complex;tRNA-intron endonuclease complex		0	1.38706	0.40368	3.66236	Q9BSV6	Q9BSV6	SEN34_HUMAN	TSEN34	TSEN34	tRNA-splicing endonuclease subunit Sen34	5236.02	5547.38	6609.41	3	7300.32	7523.8	8091.56	3	TSEN34
Q15796;Q15796-2	Q15796	SMAD2_HUMAN	SMAD2	SMAD2	Mothers against decapentaplegic homolog 2	1.20975	0.0410735	0.277276	0.615383	16844.6	17625.1	15191.5	20489.8	19781.8	19805.9	14.04	14.1053	13.891	14.3226	14.2719	14.2736	+	EtOH_Cnrtl	Cluster -224	activin receptor signaling pathway;adrenal gland development;amide transport;anatomical structure development;anatomical structure formation involved in morphogenesis;anatomical structure morphogenesis;animal organ development;animal organ morphogenesis;anterior/posterior pattern specification;aortic valve morphogenesis;aromatic compound biosynthetic process;axis specification;biological regulati…	binding;cation binding;chromatin binding;cis-regulatory region sequence-specific DNA binding;co-SMAD binding;cytokine receptor binding;cytoskeletal protein binding;disordered domain specific binding;DNA binding;DNA-binding transcription activator activity;DNA-binding transcription activator activity, RNA polymerase II-specific;DNA-binding transcription factor activity;DNA-binding transcription fa…	activin responsive factor complex;cellular anatomical entity;chromatin;cytoplasm;cytosol;heteromeric SMAD protein complex;intracellular membrane-bounded organelle;intracellular organelle;membrane-bounded organelle;nuclear protein-containing complex;nucleoplasm;nucleus;organelle;protein-containing complex;protein-DNA complex;RNA polymerase II transcription regulator complex;SMAD protein complex;tr…	Adherens junction;Cell cycle;Chagas disease (American trypanosomiasis);Colorectal cancer;Endocytosis;Pancreatic cancer;Pathways in cancer;TGF-beta signaling pathway;Wnt signaling pathway	0	1.38644	0.277276	4.22825	Q15796;Q15796-2	Q15796	SMAD2_HUMAN	SMAD2	SMAD2	Mothers against decapentaplegic homolog 2	16844.6	17625.1	15191.5	3	20489.8	19781.8	19805.9	3	SMAD2
O95822;O95822-2	O95822	DCMC_HUMAN	MLYCD	MLYCD	Malonyl-CoA decarboxylase, mitochondrial	1.18846	0.0413108	0.249788	0.522594	21673.5	22923	25180.4	29716.4	26999	26212	14.4036	14.4845	14.62	14.859	14.7206	14.6779	+	EtOH_Cnrtl	Cluster -224	acetyl-CoA biosynthetic process;acetyl-CoA metabolic process;acyl-CoA biosynthetic process;acyl-CoA metabolic process;amide biosynthetic process;amide metabolic process;aromatic compound biosynthetic process;aromatic compound catabolic process;biological regulation;biosynthetic process;carbohydrate derivative biosynthetic process;carbohydrate derivative catabolic process;carbohydrate derivative m…	binding;carbon-carbon lyase activity;carboxy-lyase activity;catalytic activity;identical protein binding;lyase activity;malonyl-CoA decarboxylase activity;protein binding	cellular anatomical entity;cytoplasm;cytosol;intracellular membrane-bounded organelle;intracellular organelle;intracellular organelle lumen;membrane-bounded organelle;membrane-enclosed lumen;microbody;microbody lumen;mitochondrial matrix;mitochondrion;organelle;organelle lumen;peroxisomal matrix;peroxisome	beta-Alanine metabolism;Peroxisome;Propanoate metabolism	0	1.38394	0.249788	2.99205	O95822;O95822-2	O95822	DCMC_HUMAN	MLYCD	MLYCD	Malonyl-CoA decarboxylase, mitochondrial	21673.5	22923	25180.4	3	29716.4	26999	26212	3	MLYCD
O95639	O95639	CPSF4_HUMAN	CPSF4	CPSF4	Cleavage and polyadenylation specificity factor subunit 4	0.269808	0.0415222	-1.98452	7.01941	18196.9	7166.41	12748.2	1821.3	6011.3	2450.19	14.1514	12.807	13.638	10.8308	12.5535	11.2587	+	EtOH_Cnrtl	Cluster -223	cellular aromatic compound metabolic process;cellular metabolic process;cellular nitrogen compound metabolic process;cellular process;heterocycle metabolic process;macromolecule metabolic process;metabolic process;mRNA metabolic process;mRNA processing;nitrogen compound metabolic process;nucleic acid metabolic process;nucleobase-containing compound metabolic process;organic cyclic compound metabo…	binding;cation binding;DNA binding;double-stranded DNA binding;ion binding;metal ion binding;nucleic acid binding;organic cyclic compound binding;RNA binding;sequence-specific DNA binding;sequence-specific double-stranded DNA binding;transition metal ion binding;zinc ion binding	cellular anatomical entity;intracellular membrane-bounded organelle;intracellular organelle;membrane-bounded organelle;mRNA cleavage and polyadenylation specificity factor complex;mRNA cleavage factor complex;nuclear protein-containing complex;nucleoplasm;organelle;protein-containing complex	mRNA surveillance pathway	2	1.38172	-1.98452	-3.05638	O95639	O95639	CPSF4_HUMAN	CPSF4	CPSF4	Cleavage and polyadenylation specificity factor subunit 4	18196.9	7166.41	12748.2	3		6011.3		1	CPSF4
Q15008;Q15008-4	Q15008	PSMD6_HUMAN	PSMD6	PSMD6	26S proteasome non-ATPase regulatory subunit 6	0.965653	0.0421492	-0.0504551	0.490889	275172	275748	281771	269937	270876	263278	18.07	18.073	18.1042	18.0423	18.0473	18.0062	+	EtOH_Cnrtl	Cluster -223	catabolic process;macromolecule catabolic process;macromolecule metabolic process;metabolic process;modification-dependent macromolecule catabolic process;modification-dependent protein catabolic process;nitrogen compound metabolic process;organic substance catabolic process;organic substance metabolic process;organonitrogen compound catabolic process;organonitrogen compound metabolic process;pri…		catalytic complex;cellular anatomical entity;cytoplasmic vesicle lumen;cytosol;endopeptidase complex;extracellular region;ficolin-1-rich granule lumen;intracellular organelle lumen;intracellular protein-containing complex;membrane-enclosed lumen;nucleoplasm;organelle lumen;peptidase complex;proteasome accessory complex;proteasome complex;proteasome regulatory particle;protein-containing complex;s…	Proteasome	0	1.37521	-0.0504551	-2.98051	Q15008;Q15008-4	Q15008	PSMD6_HUMAN	PSMD6	PSMD6	26S proteasome non-ATPase regulatory subunit 6	275172	275748	281771	3	269937	270876	263278	3	PSMD6
Q9Y2I8;Q9Y2I8-2	Q9Y2I8	WDR37_HUMAN	WDR37	WDR37	WD repeat-containing protein 37	1.12709	0.042506	0.173693	0.265735	70441.4	77733.8	71307.7	81264	84881.5	81231.3	16.1041	16.2463	16.1218	16.3103	16.3732	16.3097	+	EtOH_Cnrtl	Cluster -224	anatomical structure development;corpus callosum development;developmental process;homeostasis of number of cells;homeostatic process;immune system process;leukocyte homeostasis;lymphocyte homeostasis;multicellular organismal process;multicellular organismal-level homeostasis		cellular anatomical entity;cytoplasm;intracellular membrane-bounded organelle;intracellular organelle;membrane-bounded organelle;nucleus;organelle		0	1.37155	0.173693	3.51413	Q9Y2I8;Q9Y2I8-2	Q9Y2I8	WDR37_HUMAN	WDR37	WDR37	WD repeat-containing protein 37	70441.4	77733.8	71307.7	3	81264	84881.5	81231.3	3	WDR37
P41743	P41743	KPCI_HUMAN	PRKCI	PRKCI	Protein kinase C iota type	0.959769	0.0427123	-0.0591774	0.520331	16748.9	16420.1	17042.6	16333	15899.4	15959.1	14.0318	14.0032	14.0569	13.9955	13.9567	13.9621	+	EtOH_Cnrtl	Cluster -223	actin filament organization;anatomical structure development;biological regulation;cell development;cell junction organization;cell migration;cell motility;cell-cell junction organization;cellular component organization;cellular component organization or biogenesis;cellular developmental process;cellular localization;cellular macromolecule localization;cellular metabolic process;cellular process;…	adenyl nucleotide binding;adenyl ribonucleotide binding;anion binding;ATP binding;binding;calcium-dependent protein kinase activity;calcium-dependent protein serine/threonine kinase activity;calcium,diacylglycerol-dependent serine/threonine kinase activity;carbohydrate derivative binding;catalytic activity;catalytic activity, acting on a protein;cation binding;diacylglycerol-dependent serine/thre…	anchoring junction;apical plasma membrane;bicellular tight junction;bounding membrane of organelle;brush border;catalytic complex;cell junction;cell leading edge;cell-cell junction;cellular anatomical entity;cluster of actin-based cell projections;cytoplasmic vesicle;cytoskeleton;cytosol;endosome;extracellular exosome;extracellular membrane-bounded organelle;extracellular organelle;extracellular …	Endocytosis;Insulin signaling pathway;Tight junction	0	1.36945	-0.0591774	-3.00484	P41743	P41743	KPCI_HUMAN	PRKCI	PRKCI	Protein kinase C iota type	16748.9	16420.1	17042.6	3	16333	15899.4	15959.1	3	PRKCI
P29597	P29597	TYK2_HUMAN	TYK2	TYK2	Non-receptor tyrosine-protein kinase TYK2	0.887411	0.0427315	-0.173421	0.905967	38149.2	37377.3	38615.7	35710.5	32459.5	33121.1	15.2194	15.1899	15.2369	15.1241	14.9864	15.0155	+	EtOH_Cnrtl	Cluster -223	biological process involved in interspecies interaction between organisms;biological regulation;cell differentiation;cell surface receptor signaling pathway;cellular developmental process;cellular metabolic process;cellular process;cellular response to virus;cytokine-mediated signaling pathway;developmental process;enzyme-linked receptor protein signaling pathway;growth hormone receptor signaling…	adenyl nucleotide binding;adenyl ribonucleotide binding;angiotensin receptor binding;anion binding;ATP binding;binding;carbohydrate derivative binding;catalytic activity;catalytic activity, acting on a protein;cytokine receptor binding;G protein-coupled receptor binding;growth hormone receptor binding;heterocyclic compound binding;hormone receptor binding;ion binding;kinase activity;non-membrane …	cellular anatomical entity;cytoplasm;cytoplasmic side of membrane;cytoplasmic side of plasma membrane;cytoskeleton;cytosol;extracellular exosome;extracellular membrane-bounded organelle;extracellular organelle;extracellular vesicle;extrinsic component of membrane;extrinsic component of plasma membrane;interleukin-12 receptor complex;interleukin-23 receptor complex;intracellular membrane-bounded o…	Hepatitis C;Jak-STAT signaling pathway;ko05152;Measles;Osteoclast differentiation;Toxoplasmosis	0	1.36925	-0.173421	-3.93322	P29597	P29597	TYK2_HUMAN	TYK2	TYK2	Non-receptor tyrosine-protein kinase TYK2	38149.2	37377.3	38615.7	3	35710.5	32459.5	33121.1	3	TYK2
P27824;P27824-2	P27824	CALX_HUMAN	CANX	CANX	Calnexin	1.13499	0.042972	0.181507	0.29211	1.2e+06	1.2e+06	1.23e+06	1.38e+06	1.3e+06	1.44e+06	20.1946	20.1946	20.2302	20.3962	20.3101	20.4576	+	EtOH_Cnrtl	Cluster -224	catabolic process;cellular localization;cellular macromolecule localization;cellular process;cellular response to stimulus;cellular response to stress;clathrin-dependent endocytosis;endocytosis;ERAD pathway;establishment of localization;establishment of localization in cell;establishment of protein localization;establishment of protein localization to extracellular region;export from cell;import …	binding;calcium ion binding;carbohydrate binding;cation binding;ion binding;metal ion binding;nucleic acid binding;organic cyclic compound binding;protein binding;RNA binding;unfolded protein binding	cellular anatomical entity;cytoplasmic vesicle;endoplasmic reticulum;endoplasmic reticulum lumen;endoplasmic reticulum membrane;endoplasmic reticulum quality control compartment;extracellular exosome;extracellular membrane-bounded organelle;extracellular organelle;extracellular vesicle;intracellular membrane-bounded organelle;intracellular organelle;intracellular organelle lumen;intracellular ves…	Antigen processing and presentation;Phagosome;Protein processing in endoplasmic reticulum	0	1.36681	0.181507	4.08684	P27824;P27824-2	P27824	CALX_HUMAN	CANX	CANX	Calnexin	1200000	1200000	1230000	3	1380000	1300000	1440000	3	CANX
Q6BCY4-2	Q6BCY4-2	NB5R2_HUMAN	CYB5R2	CYB5R2	Isoform 2 of NADH-cytochrome b5 reductase 2	0.899783	0.0430476	-0.151711	0.832684	12866.8	12727.1	13914.4	12259.2	11492	11797.7	13.6514	13.6356	13.7643	13.5816	13.4883	13.5262	+	EtOH_Cnrtl	Cluster -223	bicarbonate transport;biosynthetic process;establishment of localization;lipid biosynthetic process;lipid metabolic process;localization;metabolic process;one-carbon compound transport;organic anion transport;organic cyclic compound biosynthetic process;organic cyclic compound metabolic process;organic hydroxy compound biosynthetic process;organic hydroxy compound metabolic process;organic substa…	anion binding;binding;catalytic activity;cytochrome-b5 reductase activity, acting on NAD(P)H;FAD binding;flavin adenine dinucleotide binding;heterocyclic compound binding;ion binding;nucleoside phosphate binding;nucleotide binding;organic cyclic compound binding;oxidoreductase activity;oxidoreductase activity, acting on NAD(P)H;oxidoreductase activity, acting on NAD(P)H, heme protein as acceptor;…	cellular anatomical entity;endoplasmic reticulum membrane;intracellular membrane-bounded organelle;intracellular organelle;membrane;membrane-bounded organelle;mitochondrion;nucleus;organelle;organelle membrane	Amino sugar and nucleotide sugar metabolism	0	1.36605	-0.151711	-3.11308	Q6BCY4-2	Q6BCY4-2	NB5R2_HUMAN	CYB5R2	CYB5R2	Isoform 2 of NADH-cytochrome b5 reductase 2	12866.8	12727.1	13914.4	3	12259.2	11492	11797.7	3	CYB5R2
Q92547	Q92547	TOPB1_HUMAN	TOPBP1	TOPBP1	DNA topoisomerase 2-binding protein 1	0.852807	0.0431321	-0.227981	1.09014	8717.12	9196.3	10066.6	8303.24	7914.45	7643.87	13.0896	13.1668	13.2973	13.0195	12.9503	12.9001	+	EtOH_Cnrtl	Cluster -223	biological regulation;cell cycle checkpoint signaling;cell cycle process;cellular aromatic compound metabolic process;cellular metabolic process;cellular nitrogen compound metabolic process;cellular process;cellular response to stimulus;cellular response to stress;DNA damage checkpoint signaling;DNA damage response;DNA integrity checkpoint signaling;DNA metabolic process;DNA recombination;DNA rep…	binding;DNA binding;identical protein binding;nucleic acid binding;organic cyclic compound binding;protein binding	actin cytoskeleton;BRCA1-B complex;cellular anatomical entity;chromosome;condensed chromosome;condensed nuclear chromosome;cytoplasm;cytoskeleton;germ cell nucleus;intracellular membrane-bounded organelle;intracellular non-membrane-bounded organelle;intracellular organelle;male germ cell nucleus;membrane;membrane-bounded organelle;microtubule organizing center;non-membrane-bounded organelle;nucle…		0	1.3652	-0.227981	-3.26703	Q92547	Q92547	TOPB1_HUMAN	TOPBP1	TOPBP1	DNA topoisomerase 2-binding protein 1	8717.12	9196.3	10066.6	3	8303.24	7914.45	7643.87	3	TOPBP1
Q96RD7;Q96RD7-2	Q96RD7	PANX1_HUMAN	PANX1	PANX1	Pannexin-1	1.25338	0.043383	0.323998	0.773096	14719.2	13066.7	12634.8	14965.9	18084.3	17612.2	13.8454	13.6736	13.6251	13.8694	14.1425	14.1043	+	EtOH_Cnrtl	Cluster -224	anatomical structure development;biological regulation;calcium ion transport;cell communication;cell development;cell-cell signaling;cellular developmental process;cellular process;cellular process involved in reproduction in multicellular organism;developmental process;developmental process involved in reproduction;establishment of localization;female gamete generation;gamete generation;germ cel…	actin binding;actin filament binding;binding;calcium channel activity;calcium ion transmembrane transporter activity;channel activity;cytoskeletal protein binding;enzyme binding;gap junction channel activity;identical protein binding;inorganic cation transmembrane transporter activity;inorganic molecular entity transmembrane transporter activity;leak channel activity;metal ion transmembrane trans…	anchoring junction;bleb;cell junction;cell projection;cell-cell junction;cellular anatomical entity;endoplasmic reticulum;endoplasmic reticulum membrane;gap junction;intracellular membrane-bounded organelle;intracellular organelle;membrane;membrane-bounded organelle;organelle;organelle membrane;plasma membrane;plasma membrane bounded cell projection;protein-containing complex		0	1.36268	0.323998	2.98834	Q96RD7;Q96RD7-2	Q96RD7	PANX1_HUMAN	PANX1	PANX1	Pannexin-1	14719.2	13066.7	12634.8	3	14965.9	18084.3	17612.2	3	PANX1
P22830;P22830-2	P22830	HEMH_HUMAN	FECH	FECH	Ferrochelatase, mitochondrial	1.08995	0.0438483	0.124838	0.100821	91053.3	88761.8	95448.7	101445	99175.5	99402.3	16.4744	16.4377	16.5424	16.6303	16.5977	16.601	+	EtOH_Cnrtl	Cluster -224	alcohol metabolic process;aromatic compound biosynthetic process;biological regulation;biosynthetic process;cell differentiation;cellular aromatic compound metabolic process;cellular biosynthetic process;cellular component assembly;cellular component organization;cellular component organization or biogenesis;cellular developmental process;cellular metabolic process;cellular nitrogen compound bios…	2 iron, 2 sulfur cluster binding;binding;catalytic activity;cation binding;ferrochelatase activity;ferrous iron binding;heme binding;identical protein binding;ion binding;iron ion binding;iron-responsive element binding;iron-sulfur cluster binding;lyase activity;metal cluster binding;metal ion binding;mRNA binding;nucleic acid binding;organic cyclic compound binding;protein binding;protein dimeri…	cellular anatomical entity;intracellular membrane-bounded organelle;intracellular organelle;intracellular organelle lumen;membrane;membrane-bounded organelle;membrane-enclosed lumen;mitochondrial inner membrane;mitochondrial matrix;mitochondrial membrane;mitochondrion;organelle;organelle inner membrane;organelle lumen;organelle membrane	Porphyrin and chlorophyll metabolism	0	1.35805	0.124838	3.85296	P22830;P22830-2	P22830	HEMH_HUMAN	FECH	FECH	Ferrochelatase, mitochondrial	91053.3	88761.7	95448.8	3	101445	99175.5	99402.3	3	FECH
Q8N0Z6	Q8N0Z6	TTC5_HUMAN	TTC5	TTC5	Tetratricopeptide repeat protein 5	0.87256	0.0444071	-0.195844	0.981657	12580.2	13701.8	14224.7	11714.2	12366.9	11263.4	13.6189	13.7421	13.7961	13.516	13.5942	13.4594	+	EtOH_Cnrtl	Cluster -223	biological regulation;cell communication;cellular aromatic compound metabolic process;cellular metabolic process;cellular nitrogen compound metabolic process;cellular process;cellular response to external stimulus;cellular response to extracellular stimulus;cellular response to nutrient levels;cellular response to starvation;cellular response to stimulus;cellular response to stress;DNA damage res…	binding;chromatin binding;DNA binding;nucleic acid binding;organic cyclic compound binding;protein-containing complex binding;ribonucleoprotein complex binding;ribosome binding	cellular anatomical entity;cytoplasmic vesicle;cytosol;intracellular membrane-bounded organelle;intracellular organelle;intracellular organelle lumen;intracellular vesicle;membrane-bounded organelle;membrane-enclosed lumen;mitochondrial matrix;mitochondrion;nucleoplasm;organelle;organelle lumen;vesicle		0	1.35255	-0.195844	-2.99391	Q8N0Z6	Q8N0Z6	TTC5_HUMAN	TTC5	TTC5	Tetratricopeptide repeat protein 5	12580.2	13701.8	14224.7	3	11714.2	12366.9	11263.4	3	TTC5
Q86WN1	Q86WN1	FCSD1_HUMAN	FCHSD1	FCHSD1	F-BAR and double SH3 domains protein 1	1.15915	0.0444089	0.213546	0.400259	26547.3	26604.9	23690.3	29061.2	28361.3	31649.3	14.6963	14.6994	14.532	14.8268	14.7916	14.9499	+	EtOH_Cnrtl	Cluster -224	anterograde trans-synaptic signaling;biological regulation;cell communication;cell-cell signaling;cellular component organization;cellular component organization or biogenesis;cellular process;chemical synaptic transmission;membrane organization;neuromuscular synaptic transmission;positive regulation of actin filament polymerization;positive regulation of biological process;positive regulation of…	binding;lipid binding	cell junction;cell projection;cellular anatomical entity;cuticular plate;cytoplasmic vesicle;endosome;intracellular membrane-bounded organelle;intracellular organelle;intracellular vesicle;membrane-bounded organelle;neuromuscular junction;organelle;perikaryon;recycling endosome;synapse;vesicle		0	1.35253	0.213546	2.91737	Q86WN1	Q86WN1	FCSD1_HUMAN	FCHSD1	FCHSD1	F-BAR and double SH3 domains protein 1	26547.3	26604.9	23690.3	3	29061.2	28361.3	31649.3	3	FCHSD1
P0C7T5	P0C7T5	ATX1L_HUMAN	ATXN1L	ATXN1L	Ataxin-1-like	1.24817	0.0444816	0.323723	0.772165	16620.1	17483.3	14469.1	19383.3	20792.9	20450.6	14.0206	14.0937	13.8207	14.2425	14.3438	14.3199	+	EtOH_Cnrtl	Cluster -224	anatomical structure development;animal organ development;aromatic compound biosynthetic process;behavior;biological process involved in intraspecies interaction between organisms;biological regulation;biosynthetic process;brain development;cellular aromatic compound metabolic process;cellular biosynthetic process;cellular component organization;cellular component organization or biogenesis;cellu…	binding;DNA binding;nucleic acid binding;organic cyclic compound binding;RNA binding	cell projection;cellular anatomical entity;dendrite;intracellular membrane-bounded organelle;intracellular non-membrane-bounded organelle;intracellular organelle;membrane-bounded organelle;neuron projection;non-membrane-bounded organelle;nucleolus;nucleoplasm;nucleus;organelle;plasma membrane bounded cell projection		0	1.35182	0.323723	3.71528	P0C7T5	P0C7T5	ATX1L_HUMAN	ATXN1L	ATXN1L	Ataxin-1-like	16620.1	17483.3	14469.1	3	19383.3	20792.9	20450.6	3	ATXN1L
Q9NSU2;Q9NSU2-1;Q9NSU2-2	Q9NSU2	TREX1_HUMAN	TREX1	TREX1	Three-prime repair exonuclease 1	1.41419	0.0447162	0.50959	1.39957	20352.2	16260.2	14829.8	26618.8	22911.9	23218.2	14.3129	13.9891	13.8562	14.7002	14.4838	14.503	+	EtOH_Cnrtl	Cluster -224	activation of immune response;adaptive immune response;adaptive immune response based on somatic recombination of immune receptors built from immunoglobulin superfamily domains;anatomical structure development;anatomical structure morphogenesis;animal organ development;animal organ morphogenesis;antigen processing and presentation;apoptotic cell clearance;aromatic compound biosynthetic process;ar…	3'-5' exonuclease activity;3'-5'-DNA exonuclease activity;adenyl deoxyribonucleotide binding;adenyl nucleotide binding;binding;carbohydrate derivative binding;catalytic activity;catalytic activity, acting on a nucleic acid;catalytic activity, acting on DNA;cation binding;deoxyribonucleotide binding;DNA binding;DNA binding, bending;DNA exonuclease activity;DNA exonuclease activity, producing 5'-ph…	catalytic complex;cellular anatomical entity;cytoplasm;cytosol;endoplasmic reticulum membrane;endoplasmic reticulum protein-containing complex;envelope;membrane;membrane protein complex;nuclear envelope;nuclear replication fork;oligosaccharyltransferase complex;organelle envelope;organelle membrane;protein-containing complex;protein-DNA complex;replication fork;transferase complex	Cytosolic DNA-sensing pathway	0	1.34954	0.50959	3.34747	Q9NSU2;Q9NSU2-1;Q9NSU2-2	Q9NSU2	TREX1_HUMAN	TREX1	TREX1	Three-prime repair exonuclease 1	20352.2	16260.2	14829.8	3	26618.8	22911.9	23218.2	3	TREX1
Q8IV04	Q8IV04	TB10C_HUMAN	TBC1D10C	TBC1D10C	Carabin	0.491553	0.0447621	-1.02299	3.77371	6925.09	4965.27	9187.16	4701.12	2813.91	2845.7	12.7576	12.2777	13.1654	12.1988	11.4584	11.4746	+	EtOH_Cnrtl	Cluster -223	B cell activation;biological regulation;calcineurin-mediated signaling;calcineurin-NFAT signaling cascade;calcium-mediated signaling;cell activation;cellular localization;cellular process;cytosolic transport;endosomal transport;ERK1 and ERK2 cascade;establishment of localization;establishment of localization in cell;immune system process;intracellular signal transduction;intracellular transport;l…	enzyme activator activity;enzyme regulator activity;GTPase activator activity;GTPase regulator activity;molecular function activator activity;molecular function regulator activity;nucleoside-triphosphatase regulator activity	bounding membrane of organelle;cell projection membrane;cellular anatomical entity;cytoplasmic vesicle membrane;cytosol;ficolin-1-rich granule membrane;filopodium membrane;membrane;organelle membrane;plasma membrane;plasma membrane region;secretory granule membrane;vesicle membrane		2	1.34909	-1.02299	-2.88848	Q8IV04	Q8IV04	TB10C_HUMAN	TBC1D10C	TBC1D10C	Carabin	6925.09	4965.27	9187.16	3	4701.12			1	TBC1D10C
Q9ULZ3-3	Q9ULZ3-3	ASC_HUMAN	PYCARD	PYCARD	Isoform 3 of Apoptosis-associated speck-like protein containing a CARD	0.72928	0.0449685	-0.450538	1.84139	335832	308902	410309	252498	231157	285767	18.3574	18.2368	18.6464	17.9459	17.8185	18.1245	+	EtOH_Cnrtl	Cluster -223	activation of cysteine-type endopeptidase activity involved in apoptotic process;activation of immune response;activation of innate immune response;apoptotic process;apoptotic signaling pathway;biological process involved in interspecies interaction between organisms;biological regulation;biosynthetic process;canonical inflammasome complex assembly;carboxylic acid biosynthetic process;carboxylic …	binding;BMP receptor binding;cysteine-type endopeptidase activator activity involved in apoptotic process;cysteine-type endopeptidase regulator activity involved in apoptotic process;cytokine receptor binding;cytoskeletal protein binding;enzyme activator activity;enzyme binding;enzyme regulator activity;growth factor receptor binding;identical protein binding;interleukin-6 receptor binding;molecu…	AIM2 inflammasome complex;azurophil granule lumen;bounding membrane of organelle;canonical inflammasome complex;catalytic complex;cell body;cellular anatomical entity;cytoplasm;cytoplasmic vesicle lumen;cytosol;endoplasmic reticulum;extracellular region;Golgi membrane;IkappaB kinase complex;intracellular membrane-bounded organelle;intracellular non-membrane-bounded organelle;intracellular organel…	Cytosolic DNA-sensing pathway;NOD-like receptor signaling pathway	0	1.34709	-0.450538	-2.99429	Q9ULZ3-3	Q9ULZ3-3	ASC_HUMAN	PYCARD	PYCARD	Isoform 3 of Apoptosis-associated speck-like protein containing a CARD	335832	308902	410309	3	252498	231157	285767	3	PYCARD
Q8N594;Q8N594-2	Q8N594	MPND_HUMAN	MPND	MPND	MPN domain-containing protein	1.29279	0.0452473	0.375449	0.946771	12874.2	12195.8	10213.1	14100.2	15775.9	15737.4	13.6522	13.5741	13.3181	13.7834	13.9454	13.9419	+	EtOH_Cnrtl	Cluster -224	cellular aromatic compound metabolic process;cellular metabolic process;cellular nitrogen compound metabolic process;cellular process;cellular response to stimulus;cellular response to stress;DNA damage response;DNA metabolic process;DNA repair;double-strand break repair;heterocycle metabolic process;macromolecule metabolic process;metabolic process;nitrogen compound metabolic process;nucleic aci…	binding;catalytic activity;catalytic activity, acting on a protein;cation binding;hydrolase activity;ion binding;metal ion binding;metallopeptidase activity;modification-dependent protein binding;peptidase activity;polyubiquitin modification-dependent protein binding;protein binding	BRCA1-A complex;BRISC complex;nuclear protein-containing complex;protein-containing complex		0	1.34441	0.375449	3.28877	Q8N594;Q8N594-2	Q8N594	MPND_HUMAN	MPND	MPND	MPN domain-containing protein	12874.2	12195.8	10213.1	3	14100.2	15775.9	15737.4	3	MPND
P30049	P30049	ATPD_HUMAN	ATP5F1D	ATP5F1D	ATP synthase subunit delta, mitochondrial	1.4008	0.0457915	0.477573	1.29149	323614	334400	304162	508193	382490	457131	18.3039	18.3512	18.2145	18.955	18.5451	18.8022	+	EtOH_Cnrtl	Cluster -224	aerobic respiration;aromatic compound biosynthetic process;ATP biosynthetic process;ATP metabolic process;biosynthetic process;carbohydrate derivative biosynthetic process;carbohydrate derivative metabolic process;cellular aromatic compound metabolic process;cellular biosynthetic process;cellular component assembly;cellular component organization;cellular component organization or biogenesis;cell…	catalytic activity;channel activity;inorganic cation transmembrane transporter activity;inorganic molecular entity transmembrane transporter activity;ligase activity;monoatomic cation channel activity;monoatomic cation transmembrane transporter activity;monoatomic ion channel activity;monoatomic ion transmembrane transporter activity;passive transmembrane transporter activity;proton channel activ…	ATPase complex;catalytic complex;cellular anatomical entity;inner mitochondrial membrane protein complex;intracellular membrane-bounded organelle;intracellular organelle;intracellular organelle lumen;membrane;membrane protein complex;membrane-bounded organelle;membrane-enclosed lumen;mitochondrial inner membrane;mitochondrial matrix;mitochondrial membrane;mitochondrial protein-containing complex;…	Alzheimer's disease;Huntington's disease;Oxidative phosphorylation;Parkinson's disease	0	1.33922	0.477573	3.78556	P30049	P30049	ATPD_HUMAN	ATP5F1D	ATP5F1D	ATP synthase subunit delta, mitochondrial	323614	334400	304162	3	508193	382490	457131	3	ATP5F1D
Q8N5C6	Q8N5C6	SRBD1_HUMAN	SRBD1	SRBD1	S1 RNA-binding domain-containing protein 1	1.26447	0.0458361	0.334226	0.807621	23508.4	24440.7	22055.3	33124.1	28455.1	26939	14.5209	14.577	14.4288	15.0156	14.7964	14.7174	+	EtOH_Cnrtl	Cluster -224	amide biosynthetic process;amide metabolic process;biosynthetic process;cellular aromatic compound metabolic process;cellular biosynthetic process;cellular metabolic process;cellular nitrogen compound biosynthetic process;cellular nitrogen compound metabolic process;cellular process;heterocycle metabolic process;macromolecule biosynthetic process;macromolecule metabolic process;metabolic process;…	binding;mRNA binding;nucleic acid binding;organic cyclic compound binding;RNA binding;structural constituent of ribosome;structural molecule activity			0	1.33879	0.334226	3.37264	Q8N5C6	Q8N5C6	SRBD1_HUMAN	SRBD1	SRBD1	S1 RNA-binding domain-containing protein 1	23508.4	24440.7	22055.3	3	33124.1	28455.1	26939	3	SRBD1
O95772;O95772-2	O95772	STR3N_HUMAN	STARD3NL	STARD3NL	STARD3 N-terminal-like protein	1.14055	0.0459495	0.189875	0.320355	26932.6	24039.2	25064.8	29478.1	30115.4	27129.9	14.7171	14.5531	14.6134	14.8474	14.8782	14.7276	+	EtOH_Cnrtl	Cluster -224	cellular component organization;cellular component organization or biogenesis;cellular process;cholesterol transport;establishment of localization;lipid transport;localization;organic hydroxy compound transport;organic substance transport;sterol transport;transport;vesicle tethering;vesicle tethering to endoplasmic reticulum	alcohol binding;binding;cholesterol binding;identical protein binding;lipid binding;organic cyclic compound binding;protein binding;protein dimerization activity;protein homodimerization activity;small molecule binding;steroid binding;sterol binding	bounding membrane of organelle;cellular anatomical entity;cytoplasmic vesicle;cytoplasmic vesicle membrane;cytosol;endoplasmic reticulum-endosome membrane contact site;endosome;endosome membrane;intracellular membrane-bounded organelle;intracellular organelle;intracellular vesicle;late endosome membrane;lysosomal membrane;lytic vacuole membrane;membrane;membrane-bounded organelle;organelle;organe…		0	1.33772	0.189875	2.86158	O95772;O95772-2	O95772	STR3N_HUMAN	STARD3NL	STARD3NL	STARD3 N-terminal-like protein	26932.6	24039.2	25064.8	3	29478.1	30115.4	27129.9	3	STARD3NL
O94876	O94876	TMCC1_HUMAN	TMCC1	TMCC1	Transmembrane and coiled-coil domains protein 1	1.23156	0.046402	0.300205	0.69278	8673.57	10297.7	9750.83	10652	12742.6	11978.5	13.0824	13.33	13.2513	13.3788	13.6374	13.5482	+	EtOH_Cnrtl	Cluster -224	cellular component organization;cellular component organization or biogenesis;cellular localization;cellular process;endoplasmic reticulum organization;endosomal transport;endosome fission;endosome membrane tubulation;endosome organization;establishment of localization;establishment of localization in cell;intracellular transport;localization;membrane fission;membrane organization;membrane tubula…	binding;identical protein binding;protein binding	cellular anatomical entity;cytosol;endomembrane system;endoplasmic reticulum;endoplasmic reticulum membrane;endoplasmic reticulum-endosome membrane contact site;intracellular membrane-bounded organelle;intracellular organelle;membrane;membrane-bounded organelle;organelle;organelle membrane;organelle membrane contact site;rough endoplasmic reticulum		0	1.33346	0.300205	2.85147	O94876	O94876	TMCC1_HUMAN	TMCC1	TMCC1	Transmembrane and coiled-coil domains protein 1	8673.57	10297.7	9750.83	3	10652	12742.6	11978.5	3	TMCC1
A4D1E9	A4D1E9	GTPBA_HUMAN	GTPBP10	GTPBP10	GTP-binding protein 10	1.2633	0.0474525	0.332884	0.80309	11183.1	11884.1	10651.5	13772.2	12885.2	15939.3	13.449	13.5367	13.3788	13.7495	13.6534	13.9603	+	EtOH_Cnrtl	Cluster -224	cellular component biogenesis;cellular component organization or biogenesis;cellular process;ribonucleoprotein complex biogenesis;ribosome biogenesis	anion binding;binding;carbohydrate derivative binding;catalytic activity;cation binding;GTP binding;GTPase activity;guanyl nucleotide binding;guanyl ribonucleotide binding;heterocyclic compound binding;hydrolase activity;hydrolase activity, acting on acid anhydrides;hydrolase activity, acting on acid anhydrides, in phosphorus-containing anhydrides;ion binding;magnesium ion binding;metal ion bindi…	cellular anatomical entity;chromosome;intracellular membrane-bounded organelle;intracellular non-membrane-bounded organelle;intracellular organelle;membrane-bounded organelle;mitochondrion;non-membrane-bounded organelle;nucleolus;organelle		0	1.32374	0.332884	3.27973	A4D1E9	A4D1E9	GTPBA_HUMAN	GTPBP10	GTPBP10	GTP-binding protein 10	11183.1	11884.1	10651.5	3	13772.2	12885.2	15939.3	3	GTPBP10
O96017;O96017-9	O96017	CHK2_HUMAN	CHEK2	CHEK2	Serine/threonine-protein kinase Chk2	1.11534	0.0474766	0.157659	0.211608	19566.6	20542.2	21591.3	22333.6	22335.5	24147.2	14.2561	14.3263	14.3982	14.4469	14.4471	14.5596	+	EtOH_Cnrtl	Cluster -224	apoptotic process;apoptotic signaling pathway;biological regulation;catabolic process;cell cycle checkpoint signaling;cell cycle G2/M phase transition;cell cycle phase transition;cell cycle process;cell death;cell division;cellular aromatic compound metabolic process;cellular component assembly;cellular component organization;cellular component organization or biogenesis;cellular metabolic proces…	adenyl nucleotide binding;adenyl ribonucleotide binding;anion binding;ATP binding;binding;carbohydrate derivative binding;catalytic activity;catalytic activity, acting on a protein;cation binding;enzyme binding;heterocyclic compound binding;identical protein binding;ion binding;kinase activity;kinase binding;metal ion binding;nucleoside phosphate binding;nucleotide binding;organic cyclic compound…	cellular anatomical entity;cytoplasm;Golgi apparatus;intracellular membrane-bounded organelle;intracellular organelle;membrane-bounded organelle;nuclear body;nucleoplasm;nucleus;organelle;PML body	Cell cycle;Cell cycle - yeast;p53 signaling pathway	0	1.32352	0.157659	2.83621	O96017;O96017-9	O96017	CHK2_HUMAN	CHEK2	CHEK2	Serine/threonine-protein kinase Chk2	19566.6	20542.2	21591.3	3	22333.6	22335.5	24147.2	3	CHEK2
Q9NR45	Q9NR45	SIAS_HUMAN	NANS	NANS	Sialic acid synthase	0.867118	0.0475986	-0.204013	1.00923	516940	502889	569229	464621	468403	444876	18.9796	18.9399	19.1187	18.8257	18.8374	18.763	+	EtOH_Cnrtl	Cluster -223	aromatic compound biosynthetic process;biosynthetic process;carbohydrate biosynthetic process;carbohydrate derivative biosynthetic process;carbohydrate derivative metabolic process;carbohydrate metabolic process;cellular aromatic compound metabolic process;cellular biosynthetic process;cellular metabolic process;cellular nitrogen compound biosynthetic process;cellular nitrogen compound metabolic …	catalytic activity;cytidylyltransferase activity;N-acetylneuraminate synthase activity;N-acylneuraminate cytidylyltransferase activity;N-acylneuraminate-9-phosphate synthase activity;nucleotidyltransferase activity;transferase activity;transferase activity, transferring alkyl or aryl (other than methyl) groups;transferase activity, transferring phosphorus-containing groups	cellular anatomical entity;cytoplasm;cytosol;extracellular exosome;extracellular membrane-bounded organelle;extracellular organelle;extracellular vesicle;membrane-bounded organelle;organelle;vesicle	Amino sugar and nucleotide sugar metabolism	0	1.32241	-0.204013	-3.4635	Q9NR45	Q9NR45	SIAS_HUMAN	NANS	NANS	Sialic acid synthase	516940	502889	569229	3	464621	468403	444876	3	NANS
O75381;O75381-2	O75381	PEX14_HUMAN	PEX14	PEX14	Peroxisomal membrane protein PEX14	1.18976	0.0476473	0.25186	0.529591	78584.5	78324.7	90416.4	97327	104909	92021.4	16.262	16.2572	16.4643	16.5706	16.6788	16.4897	+	EtOH_Cnrtl	Cluster -224	biological regulation;cellular component assembly;cellular component disassembly;cellular component organization;cellular component organization or biogenesis;cellular localization;cellular macromolecule localization;cellular process;cellular response to chemical stimulus;cellular response to chemical stress;cellular response to oxidative stress;cellular response to oxygen-containing compound;cel…	beta-tubulin binding;binding;cytoskeletal protein binding;identical protein binding;macromolecule transmembrane transporter activity;microtubule binding;molecular adaptor activity;protein binding;protein transmembrane transporter activity;protein transporter activity;protein-macromolecule adaptor activity;signaling receptor binding;transcription coregulator activity;transcription corepressor acti…	bounding membrane of organelle;cellular anatomical entity;cytosol;fibrillar center;intracellular membrane-bounded organelle;intracellular organelle;membrane;membrane-bounded organelle;microbody;microbody membrane;nucleus;organelle;organelle membrane;peroxisomal importomer complex;peroxisomal membrane;peroxisome;protein-containing complex;transporter complex	Peroxisome	0	1.32196	0.25186	2.87777	O75381;O75381-2	O75381	PEX14_HUMAN	PEX14	PEX14	Peroxisomal membrane protein PEX14	78584.5	78324.7	90416.4	3	97327	104909	92021.4	3	PEX14
P62072	P62072	TIM10_HUMAN	TIMM10	TIMM10	Mitochondrial import inner membrane translocase subunit Tim10	1.21359	0.0477509	0.277816	0.617204	243203	280295	258064	284880	324105	339513	17.8918	18.0966	17.9774	18.12	18.3061	18.3731	+	EtOH_Cnrtl	Cluster -224	cellular component organization;cellular component organization or biogenesis;cellular localization;cellular macromolecule localization;cellular process;establishment of localization;establishment of localization in cell;establishment of protein localization;establishment of protein localization to membrane;establishment of protein localization to mitochondrial membrane;establishment of protein l…	binding;cation binding;identical protein binding;ion binding;membrane insertase activity;metal ion binding;molecular carrier activity;protein binding;protein carrier chaperone;protein dimerization activity;protein homodimerization activity;protein-folding chaperone binding;transition metal ion binding;zinc ion binding	cellular anatomical entity;inner mitochondrial membrane protein complex;intracellular membrane-bounded organelle;intracellular organelle;intracellular organelle lumen;membrane;membrane protein complex;membrane-bounded organelle;membrane-enclosed lumen;mitochondrial inner membrane;mitochondrial intermembrane space;mitochondrial intermembrane space protein transporter complex;mitochondrial membrane…		0	1.32102	0.277816	2.88718	P62072	P62072	TIM10_HUMAN	TIMM10	TIMM10	Mitochondrial import inner membrane translocase subunit Tim10	243203	280295	258064	3	284880	324105	339513	3	TIMM10
Q15776	Q15776	ZKSC8_HUMAN	ZKSCAN8	ZKSCAN8	Zinc finger protein with KRAB and SCAN domains 8	0.87654	0.048015	-0.188677	0.957462	6775.47	6105.6	6184.16	5677.87	5517.34	5516.22	12.7261	12.5759	12.5944	12.4711	12.4298	12.4295	+	EtOH_Cnrtl	Cluster -223	biological regulation;regulation of biological process;regulation of biosynthetic process;regulation of cellular biosynthetic process;regulation of cellular metabolic process;regulation of cellular process;regulation of DNA-templated transcription;regulation of gene expression;regulation of macromolecule biosynthetic process;regulation of macromolecule metabolic process;regulation of metabolic pr…	binding;cation binding;cis-regulatory region sequence-specific DNA binding;DNA binding;DNA-binding transcription factor activity;DNA-binding transcription factor activity, RNA polymerase II-specific;double-stranded DNA binding;ion binding;metal ion binding;nucleic acid binding;organic cyclic compound binding;RNA polymerase II cis-regulatory region sequence-specific DNA binding;RNA polymerase II t…	cellular anatomical entity;intracellular membrane-bounded organelle;intracellular organelle;membrane-bounded organelle;nucleus;organelle		0	1.31862	-0.188677	-3.82918	Q15776	Q15776	ZKSC8_HUMAN	ZKSCAN8	ZKSCAN8	Zinc finger protein with KRAB and SCAN domains 8	6775.47	6105.6	6184.16	3	5677.87	5517.34	5516.22	3	ZKSCAN8
E9PCW1	E9PCW1	E9PCW1_HUMAN	GOSR1	GOSR1	Golgi SNAP receptor complex member 1	1.25912	0.0480653	0.333727	0.805936	3276	3019.29	3730.01	3955.44	3999.57	4668.07	11.6777	11.56	11.865	11.9496	11.9656	12.1886	+	EtOH_Cnrtl	Cluster -224	cellular localization;cellular macromolecule localization;cellular process;endoplasmic reticulum to Golgi vesicle-mediated transport;establishment of localization;establishment of localization in cell;establishment of protein localization;Golgi vesicle transport;intracellular transport;localization;macromolecule localization;nitrogen compound transport;organic substance transport;protein localiza…		bounding membrane of organelle;cellular anatomical entity;cis-Golgi network;Golgi membrane;intracellular membrane-bounded organelle;intracellular organelle;membrane;membrane-bounded organelle;organelle;organelle membrane		2	1.31817	0.333727	2.83735	E9PCW1	E9PCW1	E9PCW1_HUMAN	GOSR1	GOSR1	Golgi SNAP receptor complex member 1	3276			1	3955.44	3999.57	4668.07	3	GOSR1
Q6ZS72	Q6ZS72	PEAK3_HUMAN	PEAK3	PEAK3	Protein PEAK3	0.861642	0.0482304	-0.213119	1.03997	24779.4	26677.5	23659	21325.2	21737.6	21660.2	14.5969	14.7033	14.5301	14.3803	14.4079	14.4028	+	EtOH_Cnrtl	Cluster -223	biological regulation;regulation of actin cytoskeleton organization;regulation of actin filament-based process;regulation of anatomical structure morphogenesis;regulation of biological process;regulation of biological quality;regulation of cell morphogenesis;regulation of cell shape;regulation of cellular component organization;regulation of cellular process;regulation of cytoskeleton organizatio…	binding;catalytic activity;catalytic activity, acting on a protein;kinase activity;phosphotransferase activity, alcohol group as acceptor;protein binding;protein kinase activity;protein self-association;transferase activity;transferase activity, transferring phosphorus-containing groups	actin cytoskeleton;anchoring junction;cell junction;cell-substrate junction;cellular anatomical entity;cytoskeleton;focal adhesion;intracellular non-membrane-bounded organelle;intracellular organelle;non-membrane-bounded organelle;organelle		0	1.31668	-0.213119	-4.16627	Q6ZS72	Q6ZS72	PEAK3_HUMAN	PEAK3	PEAK3	Protein PEAK3	24779.4	26677.5	23659	3	21325.2	21737.6	21660.2	3	PEAK3
P50213	P50213	IDH3A_HUMAN	IDH3A	IDH3A	Isocitrate dehydrogenase [NAD] subunit alpha, mitochondrial	1.2603	0.048285	0.331673	0.799001	434591	396297	366486	542593	523926	442532	18.7293	18.5962	18.4834	19.0495	18.999	18.7554	+	EtOH_Cnrtl	Cluster -224	alcohol metabolic process;carbohydrate metabolic process;carboxylic acid metabolic process;cellular metabolic process;cellular process;isocitrate metabolic process;metabolic process;organic acid metabolic process;organic hydroxy compound metabolic process;organic substance metabolic process;oxoacid metabolic process;primary metabolic process;secondary alcohol metabolic process;small molecule meta…	adenyl nucleotide binding;binding;catalytic activity;cation binding;heterocyclic compound binding;ion binding;isocitrate dehydrogenase (NAD+) activity;isocitrate dehydrogenase [NAD(P)+] activity;magnesium ion binding;metal ion binding;NAD binding;nucleoside phosphate binding;nucleotide binding;organic cyclic compound binding;oxidoreductase activity;oxidoreductase activity, acting on CH-OH group o…	catalytic complex;cellular anatomical entity;intracellular membrane-bounded organelle;intracellular organelle;intracellular organelle lumen;isocitrate dehydrogenase complex (NAD+);membrane-bounded organelle;membrane-enclosed lumen;mitochondrial isocitrate dehydrogenase complex (NAD+);mitochondrial matrix;mitochondrial protein-containing complex;mitochondrial tricarboxylic acid cycle enzyme comple…	Citrate cycle (TCA cycle)	0	1.31619	0.331673	2.87671	P50213	P50213	IDH3A_HUMAN	IDH3A	IDH3A	Isocitrate dehydrogenase [NAD] subunit alpha, mitochondrial	434591	396297	366486	3	542593	523926	442532	3	IDH3A
Q15836	Q15836	VAMP3_HUMAN	VAMP3	VAMP3	Vesicle-associated membrane protein 3	1.54109	0.0485464	0.639858	1.83929	129775	127392	91488	181038	189357	166915	16.9857	16.9589	16.4813	17.4659	17.5307	17.3488	+	EtOH_Cnrtl	Cluster -224	biological regulation;calcium-ion regulated exocytosis;cell adhesion;cell-substrate adhesion;cellular component assembly;cellular component organization;cellular component organization or biogenesis;cellular localization;cellular macromolecule localization;cellular process;cellular response to chemical stimulus;cellular response to cytokine stimulus;cellular response to organic substance;cellular…	binding;molecular adaptor activity;protein binding;protein-macromolecule adaptor activity;SNAP receptor activity;SNARE binding;syntaxin binding;syntaxin-1 binding	bounding membrane of organelle;cell junction;cell projection;cell surface;cellular anatomical entity;clathrin-coated endocytic vesicle membrane;clathrin-coated vesicle;clathrin-coated vesicle membrane;coated vesicle;coated vesicle membrane;cytoplasmic vesicle;cytoplasmic vesicle membrane;cytosol;early endosome membrane;endocytic vesicle membrane;endosome;endosome membrane;intracellular membrane-b…	Phagosome;SNARE interactions in vesicular transport	0	1.31384	0.639858	3.71399	Q15836	Q15836	VAMP3_HUMAN	VAMP3	VAMP3	Vesicle-associated membrane protein 3	129775	127392	91488	3	181038	189357	166915	3	VAMP3
P36639;P36639-1;P36639-2;P36639-3	P36639	8ODP_HUMAN	NUDT1	NUDT1	Oxidized purine nucleoside triphosphate hydrolase	0.879325	0.0488919	-0.185514	0.946786	100723	95708.9	107118	93870.5	89142	83906.6	16.62	16.5464	16.7088	16.5184	16.4438	16.3565	+	EtOH_Cnrtl	Cluster -223	anatomical structure development;animal organ development;aromatic compound catabolic process;carbohydrate derivative catabolic process;carbohydrate derivative metabolic process;catabolic process;cell communication;cellular aromatic compound metabolic process;cellular catabolic process;cellular metabolic process;cellular nitrogen compound catabolic process;cellular nitrogen compound metabolic pro…	2-hydroxy-ATP hydrolase activity;2-hydroxy-dATP hydrolase activity;8-oxo-7,8-dihydrodeoxyguanosine triphosphate pyrophosphatase activity;8-oxo-7,8-dihydroguanosine triphosphate pyrophosphatase activity;ATP diphosphatase activity;binding;catalytic activity;cation binding;dATP diphosphatase activity;hydrolase activity;hydrolase activity, acting on acid anhydrides;hydrolase activity, acting on acid …	acrosomal vesicle;cellular anatomical entity;cytoplasm;cytoplasmic vesicle;cytosol;extracellular space;intracellular membrane-bounded organelle;intracellular organelle;intracellular organelle lumen;intracellular vesicle;membrane;membrane-bounded organelle;membrane-enclosed lumen;mitochondrial matrix;mitochondrion;nuclear membrane;nucleus;organelle;organelle lumen;organelle membrane;secretory gran…		0	1.31076	-0.185514	-2.7984	P36639;P36639-1;P36639-2;P36639-3	P36639	8ODP_HUMAN	NUDT1	NUDT1	Oxidized purine nucleoside triphosphate hydrolase	100723	95708.9	107118	3	93870.6	89142	83906.6	3	NUDT1
Q96MF7	Q96MF7	NSE2_HUMAN	NSMCE2	NSMCE2	E3 SUMO-protein ligase NSE2	1.1914	0.0490527	0.250175	0.5239	30408.4	30000.2	28304.5	31982.6	36712.3	36998	14.8922	14.8727	14.7887	14.965	15.164	15.1752	+	EtOH_Cnrtl	Cluster -224	biological regulation;cell cycle;cell division;cellular aromatic compound metabolic process;cellular component organization;cellular component organization or biogenesis;cellular metabolic process;cellular nitrogen compound metabolic process;cellular process;cellular response to stimulus;cellular response to stress;cellular senescence;chromatin looping;chromatin organization;chromosome organizati…	acyltransferase activity;aminoacyltransferase activity;binding;catalytic activity;catalytic activity, acting on a protein;cation binding;ion binding;metal ion binding;SUMO ligase activity;SUMO transferase activity;transferase activity;transition metal ion binding;ubiquitin-like protein ligase activity;ubiquitin-like protein transferase activity;zinc ion binding	catalytic complex;cellular anatomical entity;chromosomal region;chromosome, telomeric region;intracellular membrane-bounded organelle;intracellular organelle;membrane-bounded organelle;nuclear body;nucleoplasm;nucleus;organelle;PML body;protein-containing complex;Smc5-Smc6 complex;SUMO ligase complex;transferase complex		0	1.30934	0.250175	3.32322	Q96MF7	Q96MF7	NSE2_HUMAN	NSMCE2	NSMCE2	E3 SUMO-protein ligase NSE2	30408.4	30000.2	28304.5	3	31982.6	36712.3	36998	3	NSMCE2
Q9NWU5	Q9NWU5	RM22_HUMAN	MRPL22	MRPL22	Large ribosomal subunit protein uL22m	0.786825	0.0492681	-0.341207	1.47234	35714.3	29457.8	29232.3	23963.1	26446.9	23869.7	15.1242	14.8464	14.8353	14.5485	14.6908	14.5429	+	EtOH_Cnrtl	Cluster -223	amide biosynthetic process;amide metabolic process;biosynthetic process;cellular biosynthetic process;cellular metabolic process;cellular nitrogen compound biosynthetic process;cellular nitrogen compound metabolic process;cellular process;macromolecule biosynthetic process;macromolecule metabolic process;metabolic process;mitochondrial translation;nitrogen compound metabolic process;organic subst…	binding;nucleic acid binding;organic cyclic compound binding;RNA binding;structural constituent of ribosome;structural molecule activity	cellular anatomical entity;intracellular membrane-bounded organelle;intracellular organelle;large ribosomal subunit;membrane;membrane-bounded organelle;mitochondrial inner membrane;mitochondrial large ribosomal subunit;mitochondrial membrane;mitochondrial protein-containing complex;mitochondrion;organellar large ribosomal subunit;organelle;organelle inner membrane;organelle membrane;protein-conta…		0	1.30743	-0.341207	-3.21323	Q9NWU5	Q9NWU5	RM22_HUMAN	MRPL22	MRPL22	Large ribosomal subunit protein uL22m	35714.3	29457.8	29232.3	3	23963.1	26446.9	23869.7	3	MRPL22
Q9Y228;Q9Y228-2	Q9Y228	T3JAM_HUMAN	TRAF3IP3	TRAF3IP3	TRAF3-interacting JNK-activating modulator	1.16768	0.0494392	0.225335	0.440053	23299.7	24439.9	27046.7	28896	27817.3	30613.2	14.508	14.577	14.7232	14.8186	14.7637	14.9019	+	EtOH_Cnrtl	Cluster -224	biological regulation;positive regulation of biological process;positive regulation of biosynthetic process;positive regulation of cellular biosynthetic process;positive regulation of cellular metabolic process;positive regulation of cellular process;positive regulation of cytokine production;positive regulation of gene expression;positive regulation of macromolecule biosynthetic process;positive…	molecular adaptor activity	bounding membrane of organelle;cellular anatomical entity;Golgi membrane;intracellular membrane-bounded organelle;intracellular organelle;lysosomal membrane;lytic vacuole membrane;membrane;membrane-bounded organelle;mitochondrial membrane;mitochondrial outer membrane;mitochondrion;organelle;organelle membrane;organelle outer membrane;outer membrane;plasma membrane;vacuolar membrane		0	1.30593	0.225335	3.00142	Q9Y228;Q9Y228-2	Q9Y228	T3JAM_HUMAN	TRAF3IP3	TRAF3IP3	TRAF3-interacting JNK-activating modulator	23299.7	24439.9	27046.7	3	28896	27817.3	30613.2	3	TRAF3IP3
Q9ULJ7;Q9ULJ7-2	Q9ULJ7	ANR50_HUMAN	ANKRD50	ANKRD50	Ankyrin repeat domain-containing protein 50	1.27322	0.0495081	0.353209	0.871699	5502.5	6212.83	4900.93	7147.25	7452.11	6556.77	12.4259	12.601	12.2588	12.8032	12.8634	12.6788	+	EtOH_Cnrtl	Cluster -224	cellular localization;cellular macromolecule localization;cellular process;endocytic recycling;endosomal transport;establishment of localization;establishment of localization in cell;establishment of protein localization;intracellular transport;localization;localization within membrane;macromolecule localization;nitrogen compound transport;organic substance transport;protein localization;protein …		cellular anatomical entity;cytoplasmic vesicle;endosome;intracellular membrane-bounded organelle;intracellular organelle;intracellular vesicle;membrane-bounded organelle;organelle;vesicle		0	1.30532	0.353209	3.13225	Q9ULJ7;Q9ULJ7-2	Q9ULJ7	ANR50_HUMAN	ANKRD50	ANKRD50	Ankyrin repeat domain-containing protein 50	5502.5	6212.83	4900.93	3	7147.25	7452.11	6556.77	3	ANKRD50
Q9NRY4	Q9NRY4	RHG35_HUMAN	ARHGAP35	ARHGAP35	Rho GTPase-activating protein 35	0.880571	0.0498561	-0.182285	0.935886	48874.3	50877.9	55167.4	43600.1	46683.4	46134.2	15.5768	15.6348	15.7515	15.412	15.5106	15.4935	+	EtOH_Cnrtl	Cluster -223	actin cytoskeleton organization;actin filament-based process;anatomical structure development;anatomical structure formation involved in morphogenesis;anatomical structure morphogenesis;animal organ development;axon guidance;axonal fasciculation;axonogenesis;biological regulation;camera-type eye development;cell communication;cell migration;cell motility;cell projection morphogenesis;cell project…	anion binding;binding;carbohydrate derivative binding;catalytic activity;DNA binding;enzyme activator activity;enzyme regulator activity;GTP binding;GTPase activating protein binding;GTPase activator activity;GTPase activity;GTPase regulator activity;guanyl nucleotide binding;guanyl ribonucleotide binding;heterocyclic compound binding;hydrolase activity;hydrolase activity, acting on acid anhydrid…	actin cytoskeleton;cellular anatomical entity;ciliary basal body;cytoskeleton;cytosol;intracellular membrane-bounded organelle;intracellular non-membrane-bounded organelle;intracellular organelle;membrane;membrane-bounded organelle;microtubule organizing center;non-membrane-bounded organelle;nucleus;organelle;plasma membrane	Focal adhesion;Leukocyte transendothelial migration;Regulation of actin cytoskeleton	0	1.30228	-0.182285	-3.05265	Q9NRY4	Q9NRY4	RHG35_HUMAN	ARHGAP35	ARHGAP35	Rho GTPase-activating protein 35	48874.3	50877.9	55167.4	3	43600.1	46683.4	46134.2	3	ARHGAP35
O95164	O95164	UBL3_HUMAN	UBL3	UBL3	Ubiquitin-like protein 3	1.35131	0.0499105	0.441923	1.17116	26496.2	33614.4	32643.9	40553	42129.1	42658.2	14.6935	15.0368	14.9945	15.3075	15.3625	15.3805	+	EtOH_Cnrtl	Cluster -224			cellular anatomical entity;extracellular exosome;extracellular membrane-bounded organelle;extracellular organelle;extracellular vesicle;membrane;membrane-bounded organelle;organelle;plasma membrane;vesicle		0	1.30181	0.441923	4.00704	O95164	O95164	UBL3_HUMAN	UBL3	UBL3	Ubiquitin-like protein 3	26496.2	33614.4	32643.9	3	40553	42129.1	42658.2	3	UBL3
Q9P2B2	Q9P2B2	FPRP_HUMAN	PTGFRN	PTGFRN	Prostaglandin F2 receptor negative regulator	1.11489	0.0505878	0.157945	0.212574	34735.2	37884.9	34966	40298.4	39370.8	40277.1	15.0841	15.2093	15.0937	15.2984	15.2648	15.2977				anatomical structure formation involved in morphogenesis;cell-cell fusion;cellular component organization;cellular component organization or biogenesis;cellular process;developmental process;lipid droplet organization;myoblast fusion;myoblast fusion involved in skeletal muscle regeneration;organelle organization;syncytium formation;syncytium formation by plasma membrane fusion		cell surface;cellular anatomical entity;endoplasmic reticulum membrane;Golgi apparatus;intracellular membrane-bounded organelle;intracellular organelle;membrane;membrane-bounded organelle;organelle;organelle membrane		0	1.29595	0.157945	3.78406	Q9P2B2	Q9P2B2	FPRP_HUMAN	PTGFRN	PTGFRN	Prostaglandin F2 receptor negative regulator	34735.2	37884.9	34966	3	40298.4	39370.8	40277.1	3	PTGFRN
Q9NVH2;Q9NVH2-2;Q9NVH2-3	Q9NVH2	INT7_HUMAN	INTS7	INTS7	Integrator complex subunit 7	0.940459	0.0507495	-0.0885022	0.619319	36613.6	38110.8	36090.5	33738.8	35002.2	35475.9	15.1601	15.2179	15.1393	15.0421	15.0952	15.1146				biological regulation;cell cycle checkpoint signaling;cellular aromatic compound metabolic process;cellular metabolic process;cellular nitrogen compound metabolic process;cellular process;cellular response to abiotic stimulus;cellular response to environmental stimulus;cellular response to ionizing radiation;cellular response to radiation;cellular response to stimulus;cellular response to stress;…		cellular anatomical entity;chromosome;cytoplasm;integrator complex;intracellular membrane-bounded organelle;intracellular non-membrane-bounded organelle;intracellular organelle;membrane-bounded organelle;non-membrane-bounded organelle;nuclear body;nuclear protein-containing complex;nucleoplasm;nucleus;organelle;protein-containing complex		0	1.29457	-0.0885022	-2.76928	Q9NVH2;Q9NVH2-2;Q9NVH2-3	Q9NVH2	INT7_HUMAN	INTS7	INTS7	Integrator complex subunit 7	36613.6	38110.8	36090.5	3	33738.8	35002.2	35475.9	3	INTS7
A0A7N4I394	A0A7N4I394	A0A7N4I394_HUMAN	PRPF40A	PRPF40A	Pre-mRNA processing factor 40 homolog A	1.06898	0.0509136	0.0960134	0.00352231	234259	244866	243503	249117	257541	265820	17.8377	17.9016	17.8936	17.9265	17.9744	18.0201				cellular aromatic compound metabolic process;cellular metabolic process;cellular nitrogen compound metabolic process;cellular process;heterocycle metabolic process;macromolecule metabolic process;metabolic process;mRNA cis splicing, via spliceosome;mRNA metabolic process;mRNA processing;mRNA splicing, via spliceosome;nitrogen compound metabolic process;nucleic acid metabolic process;nucleobase-co…		cellular anatomical entity;nuclear body;nuclear speck		0	1.29317	0.0960134	2.85096	A0A7N4I394	A0A7N4I394	A0A7N4I394_HUMAN	PRPF40A	PRPF40A	Pre-mRNA processing factor 40 homolog A	234259	244866	243503	3	249117	257541	265820	3	PRPF40A
Q9H582	Q9H582	ZN644_HUMAN	ZNF644	ZNF644	Zinc finger protein 644	1.18181	0.0513786	0.243163	0.500234	8459.25	9616.49	8225.01	10241.4	10933.2	9907.78	13.0463	13.2313	13.0058	13.3221	13.4164	13.2743				biological regulation;regulation of biological process;regulation of biosynthetic process;regulation of cellular biosynthetic process;regulation of cellular metabolic process;regulation of cellular process;regulation of DNA-templated transcription;regulation of gene expression;regulation of macromolecule biosynthetic process;regulation of macromolecule metabolic process;regulation of metabolic pr…	binding;cation binding;cis-regulatory region sequence-specific DNA binding;DNA binding;DNA-binding transcription factor activity;DNA-binding transcription factor activity, RNA polymerase II-specific;double-stranded DNA binding;ion binding;metal ion binding;nucleic acid binding;organic cyclic compound binding;protein binding;RNA polymerase II cis-regulatory region sequence-specific DNA binding;RNA…	cellular anatomical entity;intracellular membrane-bounded organelle;intracellular organelle;membrane-bounded organelle;nucleus;organelle		0	1.28922	0.243163	3.00238	Q9H582	Q9H582	ZN644_HUMAN	ZNF644	ZNF644	Zinc finger protein 644	8459.25	9616.49	8225.01	3	10241.4	10933.2	9907.78	3	ZNF644
Q9UI26;Q9UI26-2	Q9UI26	IPO11_HUMAN	IPO11	IPO11	Importin-11	0.968161	0.0514918	-0.0465879	0.477835	31211	31957.9	32084.9	30560.3	30877.4	30783.3	14.9298	14.9639	14.9696	14.8994	14.9143	14.9099				cellular localization;cellular macromolecule localization;cellular process;establishment of localization;establishment of localization in cell;establishment of protein localization;establishment of protein localization to organelle;import into nucleus;intracellular protein transport;intracellular transport;localization;macromolecule localization;nitrogen compound transport;nuclear transport;nucle…	binding;enzyme binding;GTPase binding;molecular carrier activity;nuclear import signal receptor activity;nucleocytoplasmic carrier activity;protein binding;small GTPase binding	cellular anatomical entity;cytosol;envelope;nuclear envelope;nucleoplasm;organelle envelope		0	1.28826	-0.0465879	-3.52996	Q9UI26;Q9UI26-2	Q9UI26	IPO11_HUMAN	IPO11	IPO11	Importin-11	31211	31957.9	32084.9	3	30560.3	30877.4	30783.3	3	IPO11
Q9H330	Q9H330	TM245_HUMAN	TMEM245	TMEM245	Transmembrane protein 245	1.18718	0.0515978	0.249308	0.520975	22244.6	26002.6	22678.2	29500.6	26208.8	28491.8	14.4412	14.6664	14.469	14.8485	14.6778	14.7983						cellular anatomical entity;membrane		0	1.28737	0.249308	2.86172	Q9H330	Q9H330	TM245_HUMAN	TMEM245	TMEM245	Transmembrane protein 245	22244.6	26002.6	22678.2	3	29500.6	26208.8	28491.8	3	TMEM245
Q68DA7	Q68DA7	FMN1_HUMAN	FMN1	FMN1	Formin-1	1.11504	0.0516374	0.156404	0.207375	19244.4	17849.5	18620.8	21876.4	20583.1	19664.8	14.2322	14.1236	14.1846	14.4171	14.3292	14.2633				actin filament organization;actin nucleation;anatomical structure morphogenesis;animal organ morphogenesis;appendage morphogenesis;biological regulation;biosynthetic process;cellular biosynthetic process;cellular component organization;cellular component organization or biogenesis;cellular metabolic process;cellular process;developmental growth;developmental growth involved in morphogenesis;devel…	actin binding;binding;cytoskeletal protein binding;microtubule binding;protein binding;protein domain specific binding;SH3 domain binding;tubulin binding	actin filament;adherens junction;anchoring junction;cell junction;cell-cell junction;cellular anatomical entity;cytoplasm;endoplasmic reticulum membrane;intracellular membrane-bounded organelle;intracellular organelle;membrane;membrane-bounded organelle;nucleus;organelle;organelle membrane;plasma membrane;polymeric cytoskeletal fiber;supramolecular complex;supramolecular fiber;supramolecular poly…		0	1.28704	0.156404	2.86955	Q68DA7	Q68DA7	FMN1_HUMAN	FMN1	FMN1	Formin-1	19244.4	17849.5	18620.8	3	21876.4	20583.1	19664.8	3	FMN1
P08237;P08237-3	P08237	PFKAM_HUMAN	PFKM	PFKM	ATP-dependent 6-phosphofructokinase, muscle type	0.838314	0.0517162	-0.251697	1.17019	110729	107888	126237	97690.4	99212.8	92192.8	16.7567	16.7192	16.9458	16.5759	16.5982	16.4924				ADP catabolic process;ADP metabolic process;aromatic compound catabolic process;ATP metabolic process;biological regulation;canonical glycolysis;carbohydrate catabolic process;carbohydrate derivative catabolic process;carbohydrate derivative metabolic process;carbohydrate homeostasis;carbohydrate metabolic process;carboxylic acid metabolic process;catabolic process;cellular aromatic compound meta…	6-phosphofructokinase activity;adenyl nucleotide binding;adenyl ribonucleotide binding;AMP binding;anion binding;ATP binding;binding;carbohydrate binding;carbohydrate derivative binding;carbohydrate kinase activity;catalytic activity;cation binding;enzyme binding;fructose binding;fructose-6-phosphate binding;heterocyclic compound binding;identical protein binding;ion binding;kinase activity;kinas…	6-phosphofructokinase complex;apical plasma membrane;catalytic complex;cellular anatomical entity;cytosol;intracellular membrane-bounded organelle;intracellular organelle;membrane;membrane-bounded organelle;nucleus;organelle;plasma membrane region;protein-containing complex;sperm principal piece;transferase complex;transferase complex, transferring phosphorus-containing groups	Fructose and mannose metabolism;Galactose metabolism;Glycolysis / Gluconeogenesis;Methane metabolism;Pentose phosphate pathway	0	1.28637	-0.251697	-3.26145	P08237;P08237-3	P08237	PFKAM_HUMAN	PFKM	PFKM	ATP-dependent 6-phosphofructokinase, muscle type	110729	107888	126237	3	97690.4	99212.8	92192.8	3	PFKM
Q13425	Q13425	SNTB2_HUMAN	SNTB2	SNTB2	Beta-2-syntrophin	1.39653	0.051961	0.484517	1.31493	7065.79	9578.4	7627.98	10467.1	10246.8	13182.9	12.7866	13.2256	12.8971	13.3536	13.3229	13.6864					actin binding;binding;calmodulin binding;cytoskeletal protein binding;nucleic acid binding;organic cyclic compound binding;protein binding;RNA binding;structural molecule activity	anchoring junction;bounding membrane of organelle;cell junction;cell-substrate junction;cellular anatomical entity;cytoplasm;cytoplasmic vesicle membrane;dystrophin-associated glycoprotein complex;focal adhesion;glycoprotein complex;Golgi apparatus;intracellular membrane-bounded organelle;intracellular organelle;membrane;membrane protein complex;membrane-bounded organelle;microtubule;nucleoplasm;…		0	1.28432	0.484517	2.75534	Q13425	Q13425	SNTB2_HUMAN	SNTB2	SNTB2	Beta-2-syntrophin	7065.79	9578.4	7627.98	3	10467.1	10246.8	13182.9	3	SNTB2
Q16836	Q16836	HCDH_HUMAN	HADH	HADH	Hydroxyacyl-coenzyme A dehydrogenase, mitochondrial	1.2205	0.0524449	0.285854	0.644337	452510	472818	406830	537601	491983	596316	18.7876	18.8509	18.6341	19.0362	18.9082	19.1857				biological regulation;carboxylic acid catabolic process;carboxylic acid metabolic process;catabolic process;cellular catabolic process;cellular lipid catabolic process;cellular lipid metabolic process;cellular metabolic process;cellular process;fatty acid beta-oxidation;fatty acid catabolic process;fatty acid metabolic process;fatty acid oxidation;lipid catabolic process;lipid metabolic process;l…	3-hydroxyacyl-CoA dehydrogenase activity;adenyl nucleotide binding;anion binding;binding;catalytic activity;heterocyclic compound binding;identical protein binding;ion binding;NAD binding;NAD+ binding;nucleoside phosphate binding;nucleotide binding;organic cyclic compound binding;oxidoreductase activity;oxidoreductase activity, acting on CH-OH group of donors;oxidoreductase activity, acting on th…	cellular anatomical entity;cytoplasm;intracellular membrane-bounded organelle;intracellular organelle;intracellular organelle lumen;membrane-bounded organelle;membrane-enclosed lumen;mitochondrial matrix;mitochondrion;nucleoplasm;organelle;organelle lumen	Butanoate metabolism;Caprolactam degradation;Fatty acid elongation in mitochondria;Fatty acid metabolism;Geraniol degradation;Lysine degradation;Tryptophan metabolism;Valine, leucine and isoleucine degradation	0	1.2803	0.285854	2.77992	Q16836	Q16836	HCDH_HUMAN	HADH	HADH	Hydroxyacyl-coenzyme A dehydrogenase, mitochondrial	452510	472818	406830	3	537601	491983	596316	3	HADH
Q4U2R6	Q4U2R6	RM51_HUMAN	MRPL51	MRPL51	Large ribosomal subunit protein mL51	1.60475	0.0525093	0.681868	1.9811	3658.88	3850.59	5393.14	5785.12	6264.31	8656.05	11.8372	11.9109	12.3969	12.4981	12.6129	13.0795				amide biosynthetic process;amide metabolic process;biosynthetic process;cellular biosynthetic process;cellular metabolic process;cellular nitrogen compound biosynthetic process;cellular nitrogen compound metabolic process;cellular process;macromolecule biosynthetic process;macromolecule metabolic process;metabolic process;mitochondrial translation;nitrogen compound metabolic process;organic subst…	structural constituent of ribosome;structural molecule activity	cellular anatomical entity;intracellular membrane-bounded organelle;intracellular non-membrane-bounded organelle;intracellular organelle;large ribosomal subunit;membrane;membrane-bounded organelle;mitochondrial inner membrane;mitochondrial large ribosomal subunit;mitochondrial membrane;mitochondrial protein-containing complex;mitochondrial ribosome;mitochondrion;non-membrane-bounded organelle;org…		0	1.27976	0.681868	2.72893	Q4U2R6	Q4U2R6	RM51_HUMAN	MRPL51	MRPL51	Large ribosomal subunit protein mL51	3658.88	3850.59	5393.14	3	5785.12	6264.31	8656.05	3	MRPL51
E9PB61	E9PB61	E9PB61_HUMAN	ALYREF	ALYREF	Aly/REF export factor	1.23065	0.0526376	0.302895	0.701859	624838	647666	532244	690665	759931	770421	19.2531	19.3049	19.0217	19.3976	19.5355	19.5553					binding;nucleic acid binding;organic cyclic compound binding;RNA binding	cellular anatomical entity;nuclear body;nuclear speck	mRNA surveillance pathway;RNA transport;Spliceosome	0	1.2787	0.302895	3.02338	E9PB61	E9PB61	E9PB61_HUMAN	ALYREF	ALYREF	Aly/REF export factor	624838	647666	532244	3	690665	759931	770421	3	ALYREF
Q7Z3K3;Q7Z3K3-2;Q7Z3K3-3;Q7Z3K3-5;Q7Z3K3-6;Q7Z3K3-7	Q7Z3K3	POGZ_HUMAN	POGZ	POGZ	Pogo transposable element with ZNF domain	1.29298	0.0531837	0.37543	0.946707	22255.5	24757.7	19099.1	29725.8	29968.5	25787.5	14.4419	14.5956	14.2212	14.8594	14.8712	14.6544				biological regulation;cell cycle process;cell division;cellular aromatic compound metabolic process;cellular component assembly;cellular component organization;cellular component organization or biogenesis;cellular metabolic process;cellular nitrogen compound metabolic process;cellular process;cellular response to stimulus;cellular response to stress;chromosome organization;DNA damage response;DN…	binding;cation binding;DNA binding;ion binding;metal ion binding;nucleic acid binding;organic cyclic compound binding	cellular anatomical entity;chromatin;cytoplasm;cytosol;intracellular membrane-bounded organelle;intracellular organelle;membrane-bounded organelle;nucleoplasm;nucleus;organelle;protein-containing complex;protein-DNA complex		0	1.27422	0.37543	2.90013	Q7Z3K3;Q7Z3K3-2;Q7Z3K3-3;Q7Z3K3-5;Q7Z3K3-6;Q7Z3K3-7	Q7Z3K3	POGZ_HUMAN	POGZ	POGZ	Pogo transposable element with ZNF domain	22255.5	24757.7	19099.1	3	29725.8	29968.5	25787.5	3	POGZ
P46527	P46527	CDN1B_HUMAN	CDKN1B	CDKN1B	Cyclin-dependent kinase inhibitor 1B	1.20792	0.0534281	0.275929	0.610836	45617.2	54777.4	49852.4	61922.7	61564.8	57999.3	15.4773	15.7413	15.6054	15.9182	15.9098	15.8237				anatomical structure development;animal organ development;apoptotic process;autophagic cell death;biological regulation;cell cycle checkpoint signaling;cell cycle G1/S phase transition;cell cycle phase transition;cell cycle process;cell death;cell population proliferation;cell surface receptor signaling pathway;cellular localization;cellular metabolic process;cellular process;cellular response to…	binding;cyclin binding;cyclin-dependent protein kinase activating kinase regulator activity;cyclin-dependent protein serine/threonine kinase inhibitor activity;cyclin-dependent protein serine/threonine kinase regulator activity;enzyme activator activity;enzyme binding;enzyme inhibitor activity;enzyme regulator activity;heat shock protein binding;Hsp70 protein binding;kinase binding;kinase inhibit…	catalytic complex;cellular anatomical entity;Cul4-RING E3 ubiquitin ligase complex;Cul4A-RING E3 ubiquitin ligase complex;cullin-RING ubiquitin ligase complex;cytoplasm;cytoplasmic vesicle;cytosol;endosome;intracellular membrane-bounded organelle;intracellular organelle;intracellular protein-containing complex;intracellular vesicle;membrane-bounded organelle;nucleoplasm;nucleus;organelle;protein-…	Cell cycle;Chronic myeloid leukemia;Measles;Pathways in cancer;Prostate cancer	0	1.27223	0.275929	3.36582	P46527	P46527	CDN1B_HUMAN	CDKN1B	CDKN1B	Cyclin-dependent kinase inhibitor 1B	45617.2	54777.4	49852.4	3	61922.7	61564.8	57999.3	3	CDKN1B
Q13129	Q13129	RLF_HUMAN	RLF	RLF	Zinc finger protein Rlf	1.49298	0.0537108	0.594262	1.68538	8120.14	11284.2	7794.5	14646.5	12142.7	13818	12.9873	13.462	12.9282	13.8383	13.5678	13.7543				biological regulation;positive regulation of biological process;positive regulation of biosynthetic process;positive regulation of cellular biosynthetic process;positive regulation of cellular metabolic process;positive regulation of cellular process;positive regulation of DNA-templated transcription;positive regulation of macromolecule biosynthetic process;positive regulation of macromolecule me…	binding;cation binding;DNA binding;DNA-binding transcription activator activity;DNA-binding transcription activator activity, RNA polymerase II-specific;DNA-binding transcription factor activity;DNA-binding transcription factor activity, RNA polymerase II-specific;ion binding;metal ion binding;nucleic acid binding;organic cyclic compound binding;transcription regulator activity	cellular anatomical entity;intracellular membrane-bounded organelle;intracellular organelle;membrane-bounded organelle;nucleus;organelle		0	1.26994	0.594262	3.17963	Q13129	Q13129	RLF_HUMAN	RLF	RLF	Zinc finger protein Rlf	8120.14	11284.2	7794.5	3	14646.5	12142.7	13818	3	RLF
Q9NUE0;Q9NUE0-2	Q9NUE0	ZDH18_HUMAN	ZDHHC18	ZDHHC18	Palmitoyltransferase ZDHHC18	1.56276	0.0540221	0.627122	1.7963	5847.21	5339.91	5907.24	10398.7	7061.54	9254.14	12.5135	12.3826	12.5283	13.3441	12.7858	13.1759				biological process involved in interspecies interaction between organisms;biological regulation;cellular localization;cellular macromolecule localization;cellular process;defense response;defense response to other organism;establishment of localization;establishment of protein localization;establishment of protein localization to membrane;immune response;immune system process;innate immune respon…	acyltransferase activity;acyltransferase activity, transferring groups other than amino-acyl groups;catalytic activity;catalytic activity, acting on a protein;palmitoyltransferase activity;protein-cysteine S-acyltransferase activity;protein-cysteine S-palmitoyltransferase activity;S-acyltransferase activity;transferase activity	bounding membrane of organelle;cellular anatomical entity;endoplasmic reticulum;Golgi apparatus;Golgi membrane;intracellular membrane-bounded organelle;intracellular organelle;membrane;membrane-bounded organelle;organelle;organelle membrane		0	1.26743	0.627122	3.65185	Q9NUE0;Q9NUE0-2	Q9NUE0	ZDH18_HUMAN	ZDHHC18	ZDHHC18	Palmitoyltransferase ZDHHC18	5847.21	5339.91	5907.24	3	10398.7	7061.54	9254.14	3	ZDHHC18
P17098	P17098	ZNF8_HUMAN	ZNF8	ZNF8	Zinc finger protein 8	1.2188	0.0543444	0.287443	0.649703	3779.68	3839.84	4519.24	4595.84	4856.44	5342.42	11.884	11.9068	12.1419	12.1661	12.2457	12.3833				biological regulation;BMP signaling pathway;cell surface receptor signaling pathway;cellular process;enzyme-linked receptor protein signaling pathway;negative regulation of biological process;negative regulation of biosynthetic process;negative regulation of cellular biosynthetic process;negative regulation of cellular metabolic process;negative regulation of cellular process;negative regulation …	binding;cation binding;cis-regulatory region sequence-specific DNA binding;DNA binding;DNA-binding transcription factor activity;DNA-binding transcription factor activity, RNA polymerase II-specific;double-stranded DNA binding;ion binding;metal ion binding;nucleic acid binding;organic cyclic compound binding;RNA polymerase II cis-regulatory region sequence-specific DNA binding;RNA polymerase II t…	cellular anatomical entity;intracellular membrane-bounded organelle;intracellular organelle;membrane-bounded organelle;nucleus;organelle		0	1.26485	0.287443	2.76412	P17098	P17098	ZNF8_HUMAN	ZNF8	ZNF8	Zinc finger protein 8	3779.68	3839.84	4519.24	3	4595.84	4856.44	5342.42	3	ZNF8
O15516	O15516	CLOCK_HUMAN	CLOCK	CLOCK	Circadian locomoter output cycles protein kaput	1.41073	0.0546118	0.506602	1.38948	3936.18	4007.33	2926.05	5121.94	4624.04	5588.09	11.9426	11.9684	11.5147	12.3225	12.1749	12.4481				biological regulation;catabolic process;cell cycle checkpoint signaling;cellular process;cellular response to abiotic stimulus;cellular response to environmental stimulus;cellular response to ionizing radiation;cellular response to radiation;cellular response to stimulus;cellular response to stress;circadian regulation of gene expression;circadian rhythm;developmental process;developmental proces…	acetyltransferase activity;acyltransferase activity;acyltransferase activity, transferring groups other than amino-acyl groups;binding;catalytic activity;catalytic activity, acting on a protein;chromatin binding;chromatin DNA binding;cis-regulatory region sequence-specific DNA binding;DNA binding;DNA-binding transcription activator activity;DNA-binding transcription activator activity, RNA polyme…	cellular anatomical entity;chromatin;chromatoid body;chromosome;CLOCK-BMAL transcription complex;cytoplasmic ribonucleoprotein granule;cytosol;intracellular membrane-bounded organelle;intracellular non-membrane-bounded organelle;intracellular organelle;membrane-bounded organelle;non-membrane-bounded organelle;nuclear protein-containing complex;nucleoplasm;nucleus;organelle;protein-containing comp…	Circadian rhythm - fly;Circadian rhythm - mammal	0	1.26271	0.506602	3.03432	O15516	O15516	CLOCK_HUMAN	CLOCK	CLOCK	Circadian locomoter output cycles protein kaput	3936.18	4007.33	2926.05	3	5121.94	4624.04	5588.09	3	CLOCK
Q96GW9	Q96GW9	SYMM_HUMAN	MARS2	MARS2	Methionine--tRNA ligase, mitochondrial	1.26999	0.054695	0.350417	0.862272	15181.7	17036.3	13486.2	19745.6	19931.7	18366.6	13.89	14.0563	13.7192	14.2692	14.2828	14.1648				amino acid activation;amino acid metabolic process;carboxylic acid metabolic process;cellular aromatic compound metabolic process;cellular metabolic process;cellular nitrogen compound metabolic process;cellular process;heterocycle metabolic process;macromolecule metabolic process;metabolic process;methionyl-tRNA aminoacylation;ncRNA metabolic process;nitrogen compound metabolic process;nucleic ac…	adenyl nucleotide binding;adenyl ribonucleotide binding;aminoacyl-tRNA ligase activity;anion binding;ATP binding;binding;carbohydrate derivative binding;catalytic activity;catalytic activity, acting on a nucleic acid;catalytic activity, acting on a tRNA;catalytic activity, acting on RNA;heterocyclic compound binding;ion binding;ligase activity;ligase activity, forming carbon-oxygen bonds;methioni…	cellular anatomical entity;intracellular organelle lumen;membrane-enclosed lumen;mitochondrial matrix;organelle lumen	Aminoacyl-tRNA biosynthesis;Selenocompound metabolism	0	1.26205	0.350417	3.36234	Q96GW9	Q96GW9	SYMM_HUMAN	MARS2	MARS2	Methionine--tRNA ligase, mitochondrial	15181.7	17036.3	13486.2	3	19745.6	19931.7	18366.6	3	MARS2
Q12824	Q12824	SNF5_HUMAN	SMARCB1	SMARCB1	SWI/SNF-related matrix-associated actin-dependent regulator of chromatin subfamily B member 1	0.878581	0.054833	-0.185417	0.946457	37638.8	41899.2	42332.4	34159.5	36510.1	36403.4	15.1999	15.3546	15.3695	15.06	15.156	15.1518				anatomical structure development;aromatic compound biosynthetic process;biological process involved in interaction with symbiont;biological process involved in interspecies interaction between organisms;biological process involved in symbiotic interaction;biological regulation;biosynthetic process;blastocyst hatching;cell cycle;cell differentiation;cellular aromatic compound metabolic process;cel…	binding;DNA binding;DNA-binding transcription factor binding;identical protein binding;nucleic acid binding;organic cyclic compound binding;p53 binding;protein binding;RNA polymerase II-specific DNA-binding transcription factor binding;Tat protein binding;transcription coactivator activity;transcription coregulator activity;transcription factor binding;transcription regulator activity	ATPase complex;bBAF complex;brahma complex;catalytic complex;cellular anatomical entity;chromatin;chromosome;fibrillar center;germ cell nucleus;intracellular membrane-bounded organelle;intracellular non-membrane-bounded organelle;intracellular organelle;kinetochore;membrane-bounded organelle;nBAF complex;non-membrane-bounded organelle;npBAF complex;nuclear chromosome;nuclear matrix;nuclear protei…		0	1.26096	-0.185417	-2.96151	Q12824	Q12824	SNF5_HUMAN	SMARCB1	SMARCB1	SWI/SNF-related matrix-associated actin-dependent regulator of chromatin subfamily B member 1	37638.8	41899.2	42332.4	3	34159.5	36510.1	36403.4	3	SMARCB1
Q96CD0	Q96CD0	FBXL8_HUMAN	FBXL8	FBXL8	F-box/LRR-repeat protein 8	0.921657	0.0548936	-0.117277	0.716448	4418.29	4792.06	4551.85	4128.2	4192.71	4363.12	12.1093	12.2264	12.1522	12.0113	12.0337	12.0911				catabolic process;macromolecule catabolic process;macromolecule metabolic process;metabolic process;modification-dependent macromolecule catabolic process;modification-dependent protein catabolic process;nitrogen compound metabolic process;organic substance catabolic process;organic substance metabolic process;organonitrogen compound catabolic process;organonitrogen compound metabolic process;pri…		catalytic complex;cellular anatomical entity;cullin-RING ubiquitin ligase complex;cytosol;intracellular protein-containing complex;protein-containing complex;SCF ubiquitin ligase complex;transferase complex;ubiquitin ligase complex		0	1.26048	-0.117277	-2.81436	Q96CD0	Q96CD0	FBXL8_HUMAN	FBXL8	FBXL8	F-box/LRR-repeat protein 8	4418.29	4792.06	4551.85	3	4128.2	4192.71	4363.12	3	FBXL8
P35580;P35580-3	P35580	MYH10_HUMAN	MYH10	MYH10	Myosin-10	1.29443	0.0549356	0.377762	0.954577	37707.2	46408.3	36226.9	56641.4	48242.8	50890.6	15.2026	15.5021	15.1448	15.7896	15.558	15.6351				actin cytoskeleton organization;actin filament-based movement;actin filament-based process;actomyosin structure organization;biological regulation;cell adhesion;cell cycle process;cellular component organization;cellular component organization or biogenesis;cellular process;cytokinesis;cytoskeleton organization;cytoskeleton-dependent cytokinesis;mitotic cell cycle process;mitotic cytokinesis;orga…	actin binding;actin filament binding;adenyl nucleotide binding;adenyl ribonucleotide binding;ADP binding;anion binding;ATP binding;ATP-dependent activity;binding;calmodulin binding;carbohydrate derivative binding;cytoskeletal motor activity;cytoskeletal protein binding;heterocyclic compound binding;ion binding;microfilament motor activity;mRNA 5'-UTR binding;mRNA binding;nucleic acid binding;nucl…	actin filament bundle;actomyosin;cell cortex;cell projection;cellular anatomical entity;cleavage furrow;contractile actin filament bundle;cytoplasm;cytosol;extracellular exosome;extracellular membrane-bounded organelle;extracellular organelle;extracellular vesicle;intracellular membrane-bounded organelle;intracellular organelle;lamellipodium;membrane;membrane-bounded organelle;midbody;myosin comp…	Tight junction;Viral myocarditis	0	1.26015	0.377762	2.90608	P35580;P35580-3	P35580	MYH10_HUMAN	MYH10	MYH10	Myosin-10	37707.2	46408.3	36226.9	3	56641.4	48242.8	50890.6	3	MYH10
Q9NQZ5	Q9NQZ5	STAR7_HUMAN	STARD7	STARD7	StAR-related lipid transfer protein 7, mitochondrial	1.16535	0.0550965	0.220608	0.424096	21557.9	19232.8	21775.2	26198.6	23914.5	22798.2	14.3959	14.2313	14.4104	14.6772	14.5456	14.4766					binding;lipid binding	bounding membrane of organelle;cellular anatomical entity;membrane;mitochondrial membrane;mitochondrial outer membrane;organelle membrane;organelle outer membrane;outer membrane		0	1.25888	0.220608	2.68288	Q9NQZ5	Q9NQZ5	STAR7_HUMAN	STARD7	STARD7	StAR-related lipid transfer protein 7, mitochondrial	21557.9	19232.8	21775.2	3	26198.6	23914.5	22798.2	3	STARD7
Q9UKZ1	Q9UKZ1	CNO11_HUMAN	CNOT11	CNOT11	CCR4-NOT transcription complex subunit 11	0.778378	0.0554012	-0.355666	1.52114	12710.9	13359.1	15752.5	10980.1	10509.5	11064.1	13.6338	13.7055	13.9433	13.4226	13.3594	13.4336				aromatic compound catabolic process;biological regulation;catabolic process;cellular aromatic compound metabolic process;cellular catabolic process;cellular metabolic process;cellular nitrogen compound catabolic process;cellular nitrogen compound metabolic process;cellular process;heterocycle catabolic process;heterocycle metabolic process;macromolecule catabolic process;macromolecule metabolic p…		CCR4-NOT complex;cellular anatomical entity;cytosol;intracellular membrane-bounded organelle;intracellular organelle;intracellular protein-containing complex;membrane-bounded organelle;nucleus;organelle;protein-containing complex		0	1.25648	-0.355666	-3.69143	Q9UKZ1	Q9UKZ1	CNO11_HUMAN	CNOT11	CNOT11	CCR4-NOT transcription complex subunit 11	12710.9	13359.1	15752.5	3	10980.1	10509.5	11064.1	3	CNOT11
Q04864;Q04864-2	Q04864	REL_HUMAN	REL	REL	Proto-oncogene c-Rel	0.921612	0.055539	-0.117817	0.718271	60249.4	59727.7	63898.4	58967.5	55548.1	54946.2	15.8787	15.8661	15.9635	15.8476	15.7614	15.7457				biological process involved in interspecies interaction between organisms;biological regulation;canonical NF-kappaB signal transduction;cellular process;defense response;defense response to other organism;immune response;immune system process;inflammatory response;innate immune response;intracellular signal transduction;negative regulation of biological process;negative regulation of biosynthetic…	binding;cis-regulatory region sequence-specific DNA binding;DNA binding;DNA-binding transcription activator activity;DNA-binding transcription activator activity, RNA polymerase II-specific;DNA-binding transcription factor activity;DNA-binding transcription factor activity, RNA polymerase II-specific;double-stranded DNA binding;nucleic acid binding;organic cyclic compound binding;RNA polymerase I…	cellular anatomical entity;chromatin;cytosol;intracellular membrane-bounded organelle;intracellular organelle;membrane-bounded organelle;NF-kappaB complex;nuclear protein-containing complex;nucleoplasm;nucleus;organelle;protein-containing complex;protein-DNA complex		0	1.2554	-0.117817	-2.67585	Q04864;Q04864-2	Q04864	REL_HUMAN	REL	REL	Proto-oncogene c-Rel	60249.4	59727.7	63898.4	3	58967.5	55548.1	54946.2	3	REL
Q8NEL9	Q8NEL9	DDHD1_HUMAN	DDHD1	DDHD1	Phospholipase DDHD1	0.830063	0.0555562	-0.267888	1.22484	13941.2	14925.7	16638.8	13425.1	12848.5	11499	13.7671	13.8655	14.0223	13.7126	13.6493	13.4892				biological regulation;lipid metabolic process;metabolic process;organic substance metabolic process;positive regulation of biological process;positive regulation of cellular component organization;positive regulation of cellular process;positive regulation of developmental process;positive regulation of mitochondrial fission;positive regulation of mitochondrion organization;positive regulation of…	binding;carboxylic ester hydrolase activity;catalytic activity;cation binding;hydrolase activity;hydrolase activity, acting on ester bonds;ion binding;lipase activity;metal ion binding;phospholipase A1 activity;phospholipase activity	cellular anatomical entity;cytoplasm;cytosol		0	1.25527	-0.267888	-2.68675	Q8NEL9	Q8NEL9	DDHD1_HUMAN	DDHD1	DDHD1	Phospholipase DDHD1	13941.2	14925.7	16638.8	3	13425.1	12848.5	11499	3	DDHD1
P22033	P22033	MUTA_HUMAN	MMUT	MMUT	Methylmalonyl-CoA mutase, mitochondrial	1.03247	0.0556268	0.0462036	0.164613	96387.4	99090.6	98771.7	100709	101460	101636	16.5566	16.5965	16.5918	16.6198	16.6306	16.6331				acyl-CoA biosynthetic process;acyl-CoA metabolic process;alpha-amino acid metabolic process;amide biosynthetic process;amide metabolic process;amino acid metabolic process;aromatic compound biosynthetic process;biological regulation;biosynthetic process;carbohydrate derivative biosynthetic process;carbohydrate derivative metabolic process;carboxylic acid metabolic process;cellular aromatic compou…	binding;catalytic activity;cation binding;cobalamin binding;GTPase activity;heterocyclic compound binding;hydrolase activity;hydrolase activity, acting on acid anhydrides;hydrolase activity, acting on acid anhydrides, in phosphorus-containing anhydrides;identical protein binding;intramolecular transferase activity;ion binding;isomerase activity;metal ion binding;methylmalonyl-CoA mutase activity;…	cellular anatomical entity;cytoplasm;intracellular membrane-bounded organelle;intracellular organelle;intracellular organelle lumen;membrane-bounded organelle;membrane-enclosed lumen;mitochondrial matrix;mitochondrion;organelle;organelle lumen	Carbon fixation pathways in prokaryotes;Glyoxylate and dicarboxylate metabolism;Propanoate metabolism;Valine, leucine and isoleucine degradation	0	1.25472	0.0462036	3.49119	P22033	P22033	MUTA_HUMAN	MMUT	MMUT	Methylmalonyl-CoA mutase, mitochondrial	96387.4	99090.6	98771.7	3	100709	101460	101636	3	MMUT
B5MC22	B5MC22	B5MC22_HUMAN	MTFP1	MTFP1	Mitochondrial fission process protein 1	1.23225	0.0557729	0.299454	0.690247	18476.9	17803.2	15750.4	23870.2	20692.8	19551.4	14.1734	14.1198	13.9431	14.5429	14.3368	14.255								0	1.25358	0.299454	2.71333	B5MC22	B5MC22	B5MC22_HUMAN	MTFP1	MTFP1	Mitochondrial fission process protein 1	18476.9	17803.2	15750.4	3	23870.2	20692.8	19551.4	3	MTFP1
A0A9L9PXJ4	A0A9L9PXJ4	A0A9L9PXJ4_HUMAN	MYL10	MYL10	Myosin light chain 10	2.10769	0.0558262	1.13657	3.51598	17390.1	37623.9	23238.8	57251.4	62581.3	45099.9	14.086	15.1994	14.5042	15.805	15.9334	15.4608								0	1.25316	1.13657	3.21038	A0A9L9PXJ4	A0A9L9PXJ4	A0A9L9PXJ4_HUMAN	MYL10	MYL10	Myosin light chain 10	17390.1	37623.9	23238.8	3	57251.4	62581.3	45099.9	3	MYL10
P51161;P51161-2	P51161	FABP6_HUMAN	FABP6	FABP6	Gastrotropin	0.876982	0.0560013	-0.18778	0.954437	15552	15030.4	17054.5	13451.8	14020.3	14304.6	13.9248	13.8756	14.0579	13.7155	13.7752	13.8042				biological regulation;carboxylic acid transport;establishment of localization;fatty acid transport;lipid metabolic process;lipid transport;localization;metabolic process;monocarboxylic acid transport;negative regulation of biological process;negative regulation of cell population proliferation;negative regulation of cellular process;organic acid transport;organic anion transport;organic substance…	anion binding;binding;carboxylic acid binding;fatty acid binding;ion binding;lipid binding;monocarboxylic acid binding;organic acid binding;small molecule binding	cellular anatomical entity;cytoplasm;cytosol;intracellular membrane-bounded organelle;intracellular organelle;membrane;membrane-bounded organelle;nucleus;organelle	PPAR signaling pathway	0	1.2518	-0.18778	-3.11014	P51161;P51161-2	P51161	FABP6_HUMAN	FABP6	FABP6	Gastrotropin	15552	15030.4	17054.5	3	13451.8	14020.3	14304.6	3	FABP6
Q6NZ67;Q6P582	Q6NZ67	MZT2A_HUMAN;MZT2B_HUMAN	MZT2A;MZT2B	MZT2A	Mitotic-spindle organizing protein 2B	1.17772	0.0560813	0.234894	0.472322	86661.3	76191.9	80284.3	101247	86861.2	98239.8	16.4031	16.2174	16.2928	16.6275	16.4064	16.584						cellular anatomical entity;centrosome;cytosol;gamma-tubulin complex;gamma-tubulin ring complex;intracellular non-membrane-bounded organelle;intracellular organelle;microtubule organizing center;non-membrane-bounded organelle;nucleoplasm;organelle;protein-containing complex;spindle		0	1.25118	0.234894	2.71558	Q6NZ67;Q6P582	Q6NZ67	MZT2A_HUMAN;MZT2B_HUMAN	MZT2A;MZT2B	MZT2A	Mitotic-spindle organizing protein 2B	86661.4	76191.9	80284.3	3	101247	86861.1	98239.8	3	MZT2A
Q9H9E3	Q9H9E3	COG4_HUMAN	COG4	COG4	Conserved oligomeric Golgi complex subunit 4	0.957712	0.0561425	-0.0621653	0.530417	44659.9	43242.7	45068.6	42887.3	42480.2	41980.6	15.4467	15.4002	15.4598	15.3883	15.3745	15.3574				cellular component assembly;cellular component organization;cellular component organization or biogenesis;cellular localization;cellular macromolecule localization;cellular process;establishment of localization;establishment of protein localization;glycosylation;Golgi organization;Golgi vesicle prefusion complex stabilization;Golgi vesicle transport;intra-Golgi vesicle-mediated transport;localiza…	binding;identical protein binding;protein binding	bounding membrane of organelle;cellular anatomical entity;cytosol;Golgi membrane;Golgi transport complex;membrane;organelle membrane;protein-containing complex;trans-Golgi network membrane;vesicle tethering complex		0	1.25071	-0.0621653	-3.08098	Q9H9E3	Q9H9E3	COG4_HUMAN	COG4	COG4	Conserved oligomeric Golgi complex subunit 4	44659.9	43242.7	45068.6	3	42887.3	42480.2	41980.6	3	COG4
P56385	P56385	ATP5I_HUMAN	ATP5ME	ATP5ME	ATP synthase subunit e, mitochondrial	1.76371	0.0561807	0.848975	2.54518	131541	134336	84215	209298	214007	194156	17.0052	17.0355	16.3618	17.6752	17.7073	17.5669				aromatic compound biosynthetic process;ATP biosynthetic process;ATP metabolic process;biosynthetic process;carbohydrate derivative biosynthetic process;carbohydrate derivative metabolic process;cellular aromatic compound metabolic process;cellular biosynthetic process;cellular metabolic process;cellular nitrogen compound biosynthetic process;cellular nitrogen compound metabolic process;cellular p…	inorganic cation transmembrane transporter activity;inorganic molecular entity transmembrane transporter activity;monoatomic cation transmembrane transporter activity;monoatomic ion transmembrane transporter activity;proton transmembrane transporter activity;transmembrane transporter activity;transporter activity	ATPase complex;catalytic complex;cellular anatomical entity;inner mitochondrial membrane protein complex;intracellular membrane-bounded organelle;intracellular organelle;membrane;membrane protein complex;membrane-bounded organelle;mitochondrial inner membrane;mitochondrial membrane;mitochondrial protein-containing complex;mitochondrial proton-transporting ATP synthase complex;mitochondrial proton…	Oxidative phosphorylation	0	1.25041	0.848975	3.79421	P56385	P56385	ATP5I_HUMAN	ATP5ME	ATP5ME	ATP synthase subunit e, mitochondrial	131541	134336	84215	3	209298	214007	194156	3	ATP5ME
Q9UNL4;Q9UNL4-2;Q9UNL4-4;Q9UNL4-5;Q9UNL4-6;Q9UNL4-7;Q9UNL4-8	Q9UNL4	ING4_HUMAN	ING4	ING4	Inhibitor of growth protein 4	1.15919	0.0563298	0.212633	0.397178	12614.7	13520.7	11913.9	15376.7	15209.8	13519.8	13.6228	13.7229	13.5404	13.9085	13.8927	13.7228				apoptotic process;biological regulation;cell cycle;cell death;cellular component organization;cellular component organization or biogenesis;cellular process;chromatin organization;chromatin remodeling;DNA replication-dependent chromatin disassembly;macromolecule metabolic process;macromolecule modification;metabolic process;negative regulation of biological process;negative regulation of biosynth…	binding;cation binding;histone binding;ion binding;metal ion binding;methylated histone binding;methylation-dependent protein binding;modification-dependent protein binding;protein binding;transcription coactivator activity;transcription coregulator activity;transcription regulator activity	acetyltransferase complex;catalytic complex;cellular anatomical entity;cytoskeleton;cytosol;histone acetyltransferase complex;intermediate filament cytoskeleton;intracellular membrane-bounded organelle;intracellular non-membrane-bounded organelle;intracellular organelle;intracellular protein-containing complex;membrane-bounded organelle;non-membrane-bounded organelle;nucleoplasm;nucleus;organelle…		0	1.24926	0.212633	2.6751	Q9UNL4;Q9UNL4-2;Q9UNL4-4;Q9UNL4-5;Q9UNL4-6;Q9UNL4-7;Q9UNL4-8	Q9UNL4	ING4_HUMAN	ING4	ING4	Inhibitor of growth protein 4	12614.7	13520.7	11913.9	3	15376.7	15209.8	13519.8	3	ING4
A6NCE7;Q9GZQ8	A6NCE7	MLP3B_HUMAN;MP3B2_HUMAN	MAP1LC3B;MAP1LC3B2	MAP1LC3B	Microtubule-associated proteins 1A/1B light chain 3 beta 2	0.858988	0.0564393	-0.217368	1.05431	149852	129154	134165	124113	117212	113584	17.1932	16.9787	17.0336	16.9213	16.8388	16.7934				autophagosome assembly;autophagosome maturation;autophagosome organization;autophagy;autophagy of mitochondrion;catabolic process;cell communication;cellular catabolic process;cellular component assembly;cellular component disassembly;cellular component organization;cellular component organization or biogenesis;cellular metabolic process;cellular process;cellular response to external stimulus;cel…	amide binding;binding;ceramide binding;cytoskeletal protein binding;enzyme binding;lipid binding;microtubule binding;phosphatidylethanolamine binding;phospholipid binding;protein binding;sphingolipid binding;tubulin binding;ubiquitin protein ligase binding;ubiquitin-like protein ligase binding	autophagosome;autophagosome membrane;axoneme;bounding membrane of organelle;cellular anatomical entity;cytoplasmic vesicle;cytosol;endomembrane system;intracellular membrane-bounded organelle;intracellular organelle;intracellular vesicle;membrane;membrane-bounded organelle;microtubule;mitochondrial membrane;mitochondrion;organelle;organelle membrane;polymeric cytoskeletal fiber;supramolecular com…		0	1.24842	-0.217368	-2.921	A6NCE7;Q9GZQ8	A6NCE7	MLP3B_HUMAN;MP3B2_HUMAN	MAP1LC3B;MAP1LC3B2	MAP1LC3B	Microtubule-associated proteins 1A/1B light chain 3 beta 2	149852	129154	134165	3	124113	117212	113584	3	MAP1LC3B
Q8WUU5	Q8WUU5	GATD1_HUMAN	GATAD1	GATAD1	GATA zinc finger domain-containing protein 1	1.36204	0.0564679	0.446927	1.18805	2968.84	2212.7	2581.68	3081.94	3439.44	4052.42	11.5357	11.1116	11.3341	11.5896	11.748	11.9846				biological regulation;cellular component organization;cellular component organization or biogenesis;cellular process;chromatin organization;chromatin remodeling;protein-containing complex organization;protein-DNA complex organization;regulation of biological process;regulation of biosynthetic process;regulation of cellular biosynthetic process;regulation of cellular metabolic process;regulation o…	binding;cation binding;DNA binding;ion binding;metal ion binding;nucleic acid binding;organic cyclic compound binding;sequence-specific DNA binding;transition metal ion binding;zinc ion binding	cellular anatomical entity;intracellular membrane-bounded organelle;intracellular organelle;membrane-bounded organelle;nucleoplasm;nucleus;organelle		1	1.2482	0.446927	2.6629	Q8WUU5	Q8WUU5	GATD1_HUMAN	GATAD1	GATAD1	GATA zinc finger domain-containing protein 1	2968.84	2212.7		2	3081.94	3439.44	4052.42	3	GATAD1
O75319;O75319-1	O75319	DUS11_HUMAN	DUSP11	DUSP11	RNA/RNP complex-1-interacting phosphatase	0.768755	0.0564714	-0.386298	1.62454	13532.6	12321.1	12779.4	8545.39	10129.7	11024.3	13.7242	13.5888	13.6415	13.0609	13.3063	13.4284				cellular aromatic compound metabolic process;cellular metabolic process;cellular nitrogen compound metabolic process;cellular process;dephosphorylation;heterocycle metabolic process;macromolecule metabolic process;macromolecule modification;metabolic process;nitrogen compound metabolic process;nucleic acid metabolic process;nucleobase-containing compound metabolic process;organic cyclic compound …	binding;catalytic activity;catalytic activity, acting on a protein;hydrolase activity;hydrolase activity, acting on ester bonds;nucleic acid binding;organic cyclic compound binding;phosphatase activity;phosphoprotein phosphatase activity;phosphoric ester hydrolase activity;polynucleotide 5'-phosphatase activity;protein tyrosine phosphatase activity;protein tyrosine/serine/threonine phosphatase ac…	cellular anatomical entity;fibrillar center;intercellular bridge;intracellular membrane-bounded organelle;intracellular organelle;membrane-bounded organelle;nuclear body;nuclear speck;nucleoplasm;nucleus;organelle		0	1.24817	-0.386298	-3.35905	O75319;O75319-1	O75319	DUS11_HUMAN	DUSP11	DUSP11	RNA/RNP complex-1-interacting phosphatase	13532.6	12321.1	12779.4	3	8545.39	10129.7	11024.3	3	DUSP11
Q96BW9;Q96BW9-2;Q96BW9-3	Q96BW9	TAM41_HUMAN	TAMM41	TAMM41	Phosphatidate cytidylyltransferase, mitochondrial	1.35762	0.0565343	0.432567	1.13957	6957.91	6516.71	6442.81	9357.96	7648.69	10033.7	12.7644	12.6699	12.6535	13.192	12.901	13.2926				biosynthetic process;cardiolipin biosynthetic process;cardiolipin metabolic process;CDP-diacylglycerol biosynthetic process;CDP-diacylglycerol metabolic process;cellular biosynthetic process;cellular lipid metabolic process;cellular metabolic process;cellular process;glycerolipid biosynthetic process;glycerolipid metabolic process;glycerophospholipid biosynthetic process;glycerophospholipid metab…	catalytic activity;cytidylyltransferase activity;nucleotidyltransferase activity;phosphatidate cytidylyltransferase activity;transferase activity;transferase activity, transferring phosphorus-containing groups	cellular anatomical entity;extrinsic component of membrane;extrinsic component of mitochondrial inner membrane;extrinsic component of organelle membrane;intracellular membrane-bounded organelle;intracellular organelle;membrane;membrane-bounded organelle;mitochondrial inner membrane;mitochondrial membrane;mitochondrion;organelle;organelle inner membrane;organelle membrane		0	1.24769	0.432567	3.53431	Q96BW9;Q96BW9-2;Q96BW9-3	Q96BW9	TAM41_HUMAN	TAMM41	TAMM41	Phosphatidate cytidylyltransferase, mitochondrial	6957.91	6516.71	6442.81	3	9357.96	7648.69	10033.7	3	TAMM41
O15455	O15455	TLR3_HUMAN	TLR3	TLR3	Toll-like receptor 3	1.26134	0.0565459	0.334922	0.809969	10977.9	12118.7	13573.9	16191.5	16493.5	13568.9	13.4223	13.5649	13.7285	13.9829	14.0096	13.728				activation of immune response;activation of innate immune response;activation of NF-kappaB-inducing kinase activity;activation of protein kinase activity;anatomical structure development;animal organ development;apoptotic signaling pathway;biological process involved in interspecies interaction between organisms;biological regulation;biosynthetic process;cell activation;cell surface receptor sign…	binding;double-stranded RNA binding;identical protein binding;molecular transducer activity;nucleic acid binding;organic cyclic compound binding;pattern recognition receptor activity;protein binding;RNA binding;signaling receptor activity;transmembrane signaling receptor activity	bounding membrane of organelle;cellular anatomical entity;cytoplasm;cytoplasmic vesicle;cytoplasmic vesicle membrane;early endosome;endolysosome membrane;endoplasmic reticulum membrane;endosome;endosome membrane;external encapsulating structure;extracellular matrix;extracellular space;Golgi membrane;intracellular membrane-bounded organelle;intracellular organelle;intracellular vesicle;lysosomal m…	Hepatitis C;Toll-like receptor signaling pathway	0	1.2476	0.334922	2.65756	O15455	O15455	TLR3_HUMAN	TLR3	TLR3	Toll-like receptor 3	10977.9	12118.7	13573.9	3	16191.5	16493.5	13568.9	3	TLR3
Q9H3M7	Q9H3M7	TXNIP_HUMAN	TXNIP	TXNIP	Thioredoxin-interacting protein	1.25417	0.0566514	0.324596	0.775115	42242.4	36197.4	36010.4	54071.4	45820.3	43648.4	15.3664	15.1436	15.1361	15.7226	15.4837	15.4136				biological regulation;cell cycle;cell differentiation;cell surface receptor signaling pathway;cellular developmental process;cellular localization;cellular macromolecule localization;cellular process;cellular response to biotic stimulus;cellular response to lipoprotein particle stimulus;cellular response to low-density lipoprotein particle stimulus;cellular response to oxidised low-density lipopr…	binding;enzyme binding;enzyme inhibitor activity;enzyme regulator activity;molecular function inhibitor activity;molecular function regulator activity;protein binding;ubiquitin protein ligase binding;ubiquitin-like protein ligase binding	cellular anatomical entity;cytoplasm;cytosol		0	1.24679	0.324596	2.70008	Q9H3M7	Q9H3M7	TXNIP_HUMAN	TXNIP	TXNIP	Thioredoxin-interacting protein	42242.4	36197.4	36010.4	3	54071.4	45820.3	43648.4	3	TXNIP
P00749;P00749-2	P00749	UROK_HUMAN	PLAU	PLAU	Urokinase-type plasminogen activator	1.14798	0.0568751	0.199444	0.352658	18769.8	17873.8	16452.2	21719.6	19890.7	19342.6	14.1961	14.1256	14.006	14.4067	14.2798	14.2395				biological regulation;blood coagulation;cell migration;cell motility;cell surface receptor signaling pathway;cellular process;chemotaxis;coagulation;fibrinolysis;hemostasis;locomotion;macromolecule metabolic process;metabolic process;multicellular organismal process;muscle cell migration;negative regulation of biological process;negative regulation of biosynthetic process;negative regulation of b…	catalytic activity;catalytic activity, acting on a protein;endopeptidase activity;hydrolase activity;peptidase activity;serine hydrolase activity;serine-type endopeptidase activity;serine-type peptidase activity	anchoring junction;bounding membrane of organelle;catalytic complex;cell junction;cell surface;cell-substrate junction;cellular anatomical entity;cytoplasmic vesicle membrane;endopeptidase complex;external side of plasma membrane;extracellular exosome;extracellular membrane-bounded organelle;extracellular organelle;extracellular region;extracellular space;extracellular vesicle;focal adhesion;memb…	Complement and coagulation cascades	0	1.24508	0.199444	2.66101	P00749;P00749-2	P00749	UROK_HUMAN	PLAU	PLAU	Urokinase-type plasminogen activator	18769.8	17873.8	16452.2	3	21719.6	19890.7	19342.6	3	PLAU
Q86X55;Q86X55-1	Q86X55	CARM1_HUMAN	CARM1	CARM1	Histone-arginine methyltransferase CARM1	0.963252	0.0569351	-0.0539843	0.502802	89266	88399.7	91556.8	88031.9	85961.6	85335.6	16.4458	16.4318	16.4824	16.4257	16.3914	16.3809				biological regulation;cellular aromatic compound metabolic process;cellular metabolic process;cellular nitrogen compound metabolic process;cellular process;DNA metabolic process;DNA-templated DNA replication maintenance of fidelity;heterocycle metabolic process;histone methylation;histone modification;macromolecule metabolic process;macromolecule methylation;macromolecule modification;metabolic p…	acetylation-dependent protein binding;arginine N-methyltransferase activity;beta-catenin binding;binding;catalytic activity;catalytic activity, acting on a protein;DNA binding;DNA-binding transcription factor binding;double-stranded DNA binding;histone arginine N-methyltransferase activity;histone binding;histone H3 methyltransferase activity;histone H3R17 methyltransferase activity;histone H3R2 …	cellular anatomical entity;cytoplasm;cytosol;intracellular membrane-bounded organelle;intracellular organelle;membrane-bounded organelle;nuclear replication fork;nucleoplasm;nucleus;organelle;replication fork		0	1.24462	-0.0539843	-2.66219	Q86X55;Q86X55-1	Q86X55	CARM1_HUMAN	CARM1	CARM1	Histone-arginine methyltransferase CARM1	89266	88399.7	91556.8	3	88031.9	85961.6	85335.6	3	CARM1
Q9Y689	Q9Y689	ARL5A_HUMAN	ARL5A	ARL5A	ADP-ribosylation factor-like protein 5A	0.837778	0.0573111	-0.257953	1.19131	18062.6	19387.4	20231.6	15069.3	15399.9	17855.2	14.1407	14.2428	14.3043	13.8793	13.9106	14.1241				cellular localization;cellular macromolecule localization;cellular process;establishment of localization;establishment of localization in cell;establishment of protein localization;intracellular protein transport;intracellular transport;localization;localization within membrane;macromolecule localization;nitrogen compound transport;organic substance transport;protein localization;protein localiza…	anion binding;binding;carbohydrate derivative binding;catalytic activity;GTP binding;GTPase activity;guanyl nucleotide binding;guanyl ribonucleotide binding;heterocyclic compound binding;hydrolase activity;hydrolase activity, acting on acid anhydrides;hydrolase activity, acting on acid anhydrides, in phosphorus-containing anhydrides;ion binding;nucleoside phosphate binding;nucleotide binding;orga…	cellular anatomical entity;Golgi apparatus subcompartment;organelle subcompartment;trans-Golgi network		0	1.24176	-0.257953	-2.85055	Q9Y689	Q9Y689	ARL5A_HUMAN	ARL5A	ARL5A	ADP-ribosylation factor-like protein 5A	18062.6	19387.4	20231.6	3	15069.3	15399.9	17855.2	3	ARL5A
P51572;P51572-2	P51572	BAP31_HUMAN	BCAP31	BCAP31	B-cell receptor-associated protein 31	1.18201	0.0573196	0.240326	0.490656	500958	575308	532579	574902	663748	663016	18.9343	19.134	19.0226	19.133	19.3403	19.3387				apoptotic process;biological regulation;calcium ion homeostasis;calcium-mediated signaling;calcium-mediated signaling using intracellular calcium source;cell death;cellular homeostasis;cellular localization;cellular macromolecule localization;cellular process;cellular response to stimulus;cellular response to stress;chemical homeostasis;developmental process;developmental process involved in repr…	binding;MHC class I protein binding;MHC protein binding;protein binding;protein-containing complex binding;signaling receptor binding	bounding membrane of organelle;cellular anatomical entity;clathrin-coated vesicle;coated vesicle;cytoplasmic vesicle;cytosol;endoplasmic reticulum;endoplasmic reticulum membrane;endoplasmic reticulum-Golgi intermediate compartment membrane;Golgi cisterna membrane;Golgi membrane;intracellular membrane-bounded organelle;intracellular non-membrane-bounded organelle;intracellular organelle;intracellu…	Protein processing in endoplasmic reticulum	0	1.2417	0.240326	2.67433	P51572;P51572-2	P51572	BAP31_HUMAN	BCAP31	BCAP31	B-cell receptor-associated protein 31	500958	575308	532579	3	574902	663748	663016	3	BCAP31
Q8TF01	Q8TF01	PNISR_HUMAN	PNISR	PNISR	Arginine/serine-rich protein PNISR	1.14494	0.0573277	0.193513	0.332635	45250.4	43711.5	43803.2	51082.4	53649.9	47276.3	15.4656	15.4157	15.4187	15.6405	15.7113	15.5288					binding;nucleic acid binding;organic cyclic compound binding;RNA binding	cellular anatomical entity;cytosol;membrane;nuclear body;nuclear speck;nucleoplasm;plasma membrane;presynaptic active zone		0	1.24164	0.193513	3.48575	Q8TF01	Q8TF01	PNISR_HUMAN	PNISR	PNISR	Arginine/serine-rich protein PNISR	45250.4	43711.5	43803.2	3	51082.4	53649.9	47276.3	3	PNISR
Q6UXP7	Q6UXP7	F151B_HUMAN	FAM151B	FAM151B	Protein FAM151B	1.17805	0.0578462	0.238992	0.486152	6069.61	5619.04	6656.91	7289.06	7459.4	6863.59	12.5674	12.4561	12.7006	12.8315	12.8648	12.7447				anatomical structure development;cell development;cellular developmental process;cellular process;developmental process;neuron development;photoreceptor cell development		cellular anatomical entity;extracellular space		0	1.23773	0.238992	3.01639	Q6UXP7	Q6UXP7	F151B_HUMAN	FAM151B	FAM151B	Protein FAM151B	6069.61	5619.04	6656.91	3	7289.06	7459.4	6863.59	3	FAM151B
Q6ZU80	Q6ZU80	CE128_HUMAN	CEP128	CEP128	Centrosomal protein of 128 kDa	1.29409	0.0580272	0.365349	0.912676	19187	17581	18900	27525.6	22744.9	21768.8	14.2278	14.1017	14.2061	14.7485	14.4733	14.41				cellular localization;cellular macromolecule localization;cellular process;localization;macromolecule localization;protein localization		cellular anatomical entity;centriolar subdistal appendage;centriole;centrosome;Golgi apparatus;intracellular membrane-bounded organelle;intracellular non-membrane-bounded organelle;intracellular organelle;intracellular protein-containing complex;membrane;membrane-bounded organelle;microtubule organizing center;non-membrane-bounded organelle;nuclear membrane;organelle;organelle membrane;protein-co…		0	1.23637	0.365349	3.29262	Q6ZU80	Q6ZU80	CE128_HUMAN	CEP128	CEP128	Centrosomal protein of 128 kDa	19187	17581	18900	3	27525.6	22744.9	21768.8	3	CEP128
Q9GZY8-2	Q9GZY8-2	MFF_HUMAN	MFF	MFF	Isoform 2 of Mitochondrial fission factor	1.35846	0.0580404	0.434991	1.14776	21138.5	21843.5	18220.2	22953.9	29922	30264.8	14.3676	14.4149	14.1533	14.4865	14.8689	14.8854				apoptotic mitochondrial changes;biological regulation;cellular component organization;cellular component organization or biogenesis;cellular localization;cellular macromolecule localization;cellular process;establishment of localization;establishment of protein localization;establishment of protein localization to mitochondrion;establishment of protein localization to organelle;localization;macro…	binding;identical protein binding;protein binding;protein dimerization activity;protein homodimerization activity	bounding membrane of organelle;cellular anatomical entity;cytoplasmic vesicle;exocytic vesicle;intracellular membrane-bounded organelle;intracellular organelle;intracellular vesicle;membrane;membrane-bounded organelle;microbody;mitochondrial membrane;mitochondrial outer membrane;mitochondrion;organelle;organelle membrane;organelle outer membrane;outer membrane;peroxisome;protein-containing comple…		0	1.23627	0.434991	2.83985	Q9GZY8-2	Q9GZY8-2	MFF_HUMAN	MFF	MFF	Isoform 2 of Mitochondrial fission factor	21138.5	21843.5	18220.2	3	22953.9	29922	30264.8	3	MFF
Q8IVB4	Q8IVB4	SL9A9_HUMAN	SLC9A9	SLC9A9	Sodium/hydrogen exchanger 9	1.56474	0.0582307	0.666296	1.92854	5448.18	3457.17	3828.31	7357.47	6843.15	5724.27	12.4116	11.7554	11.9025	12.845	12.7404	12.4829				biological process involved in interspecies interaction between organisms;biological regulation;cellular component organization;cellular component organization or biogenesis;cellular homeostasis;cellular process;chemical homeostasis;defense response;defense response to bacterium;defense response to other organism;establishment of localization;homeostatic process;import across plasma membrane;impo…	active monoatomic ion transmembrane transporter activity;active transmembrane transporter activity;antiporter activity;inorganic cation transmembrane transporter activity;inorganic molecular entity transmembrane transporter activity;metal cation:monoatomic cation antiporter activity;metal cation:proton antiporter activity;metal ion transmembrane transporter activity;monoatomic cation transmembran…	bounding membrane of organelle;cellular anatomical entity;cytoplasmic vesicle;cytoplasmic vesicle membrane;early endosome;early endosome membrane;early phagosome;endocytic vesicle;endocytic vesicle membrane;endosome;endosome membrane;intracellular membrane-bounded organelle;intracellular organelle;intracellular vesicle;late endosome membrane;membrane;membrane-bounded organelle;organelle;organelle…		0	1.23485	0.666296	2.94757	Q8IVB4	Q8IVB4	SL9A9_HUMAN	SLC9A9	SLC9A9	Sodium/hydrogen exchanger 9	5448.18	3457.17	3828.31	3	7357.47	6843.15	5724.27	3	SLC9A9
C9JRZ6	C9JRZ6	C9JRZ6_HUMAN	CHCHD3	CHCHD3	Coiled-coil-helix-coiled-coil-helix domain containing 3	1.25707	0.0586626	0.33549	0.811886	331609	292509	262308	390942	353800	369559	18.3391	18.1581	18.0009	18.5766	18.4326	18.4954						cellular anatomical entity;inner mitochondrial membrane protein complex;intracellular membrane-bounded organelle;intracellular organelle;membrane protein complex;membrane-bounded organelle;MICOS complex;mitochondrial protein-containing complex;mitochondrion;organelle;protein-containing complex		0	1.23164	0.33549	3.15795	C9JRZ6	C9JRZ6	C9JRZ6_HUMAN	CHCHD3	CHCHD3	Coiled-coil-helix-coiled-coil-helix domain containing 3	331609	292509	262308	3	390942	353800	369559	3	CHCHD3
Q86VQ1	Q86VQ1	GLCI1_HUMAN	GLCCI1	GLCCI1	Glucocorticoid-induced transcript 1 protein	0.681334	0.0587696	-0.539937	2.14316	15151	13492.7	18828.8	10468.3	10878.2	10998.1	13.8871	13.7199	14.2007	13.3537	13.4092	13.425						cellular anatomical entity;cytoplasm		0	1.23085	-0.539937	-3.78758	Q86VQ1	Q86VQ1	GLCI1_HUMAN	GLCCI1	GLCCI1	Glucocorticoid-induced transcript 1 protein	15151	13492.7	18828.8	3	10468.3	10878.2	10998.1	3	GLCCI1
Q9BU64	Q9BU64	CENPO_HUMAN	CENPO	CENPO	Centromere protein O	1.22235	0.058794	0.291507	0.663419	6370.85	7657.64	7563.48	8065.46	8850.4	9477.17	12.6373	12.9027	12.8848	12.9775	13.1115	13.2102				cell cycle process;cellular component assembly;cellular component organization;cellular component organization or biogenesis;cellular process;centromere complex assembly;chromosome organization;chromosome segregation;organelle organization;protein-containing complex assembly;protein-containing complex organization;protein-DNA complex assembly;protein-DNA complex organization		cellular anatomical entity;cytosol;inner kinetochore;intracellular membrane-bounded organelle;intracellular organelle;membrane-bounded organelle;Mis6-Sim4 complex;nuclear body;nucleoplasm;nucleus;organelle;protein-containing complex		0	1.23067	0.291507	2.67413	Q9BU64	Q9BU64	CENPO_HUMAN	CENPO	CENPO	Centromere protein O	6370.85	7657.64	7563.48	3	8065.46	8850.4	9477.17	3	CENPO
Q96NT0	Q96NT0	CC115_HUMAN	CCDC115	CCDC115	Coiled-coil domain-containing protein 115	1.16933	0.0588401	0.228224	0.449806	53786.6	48168.9	46620.3	56917.4	59190.8	57626.7	15.715	15.5558	15.5087	15.7966	15.8531	15.8144				biological regulation;catabolic process;cellular component assembly;cellular component organization;cellular component organization or biogenesis;cellular homeostasis;cellular process;cellular response to chemical stimulus;cellular response to increased oxygen levels;cellular response to oxygen levels;cellular response to stimulus;chemical homeostasis;homeostatic process;inorganic ion homeostasis…	binding;protein binding;unfolded protein binding	ATPase complex;catalytic complex;cellular anatomical entity;coated vesicle;COPI-coated vesicle;cytoplasmic vesicle;endoplasmic reticulum;endoplasmic reticulum-Golgi intermediate compartment;endosome;Golgi-associated vesicle;intracellular membrane-bounded organelle;intracellular organelle;intracellular vesicle;lysosome;lytic vacuole;membrane;membrane protein complex;membrane-bounded organelle;orga…		0	1.23033	0.228224	3.53307	Q96NT0	Q96NT0	CC115_HUMAN	CCDC115	CCDC115	Coiled-coil domain-containing protein 115	53786.6	48168.9	46620.3	3	56917.4	59190.8	57626.7	3	CCDC115
Q9NW08	Q9NW08	RPC2_HUMAN	POLR3B	POLR3B	DNA-directed RNA polymerase III subunit RPC2	1.09189	0.0589438	0.126976	0.108037	8399.77	9138.53	8646.51	9146.5	9891.09	9553.35	13.0361	13.1577	13.0779	13.159	13.2719	13.2218				aromatic compound biosynthetic process;biological process involved in interspecies interaction between organisms;biological regulation;biosynthetic process;cellular aromatic compound metabolic process;cellular biosynthetic process;cellular metabolic process;cellular nitrogen compound biosynthetic process;cellular nitrogen compound metabolic process;cellular process;defense response;defense respon…	5'-3' RNA polymerase activity;binding;carbohydrate derivative binding;catalytic activity;catalytic activity, acting on a nucleic acid;catalytic activity, acting on RNA;cation binding;DNA binding;DNA-directed 5'-3' RNA polymerase activity;heterocyclic compound binding;ion binding;metal ion binding;nucleic acid binding;nucleoside binding;nucleotidyltransferase activity;organic cyclic compound bindi…	catalytic complex;cellular anatomical entity;cytosol;DNA-directed RNA polymerase complex;intracellular protein-containing complex;nuclear DNA-directed RNA polymerase complex;nuclear protein-containing complex;nucleoplasm;protein-containing complex;RNA polymerase complex;RNA polymerase III complex;transferase complex;transferase complex, transferring phosphorus-containing groups	Cytosolic DNA-sensing pathway;Purine metabolism;Pyrimidine metabolism;RNA polymerase	0	1.22956	0.126976	2.62514	Q9NW08	Q9NW08	RPC2_HUMAN	POLR3B	POLR3B	DNA-directed RNA polymerase III subunit RPC2	8399.77	9138.53	8646.51	3	9146.5	9891.09	9553.35	3	POLR3B
A6NFI3	A6NFI3	ZN316_HUMAN	ZNF316	ZNF316	Zinc finger protein 316	1.35022	0.0589461	0.441211	1.16875	4183.56	3561.97	3040.68	5293.44	4879.57	4390.77	12.0305	11.7985	11.5702	12.37	12.2525	12.1003				biological regulation;regulation of biological process;regulation of biosynthetic process;regulation of cellular biosynthetic process;regulation of cellular metabolic process;regulation of cellular process;regulation of DNA-templated transcription;regulation of gene expression;regulation of macromolecule biosynthetic process;regulation of macromolecule metabolic process;regulation of metabolic pr…	binding;cation binding;DNA binding;DNA-binding transcription factor activity;DNA-binding transcription factor activity, RNA polymerase II-specific;ion binding;metal ion binding;nucleic acid binding;organic cyclic compound binding;sequence-specific DNA binding;transcription regulator activity	cellular anatomical entity;intracellular membrane-bounded organelle;intracellular organelle;membrane-bounded organelle;nucleus;organelle		0	1.22954	0.441211	2.86258	A6NFI3	A6NFI3	ZN316_HUMAN	ZNF316	ZNF316	Zinc finger protein 316	4183.56	3561.97	3040.68	3	5293.44	4879.57	4390.77	3	ZNF316
P63302	P63302	SELW_HUMAN	SELENOW	SELENOW	Selenoprotein W	0.414662	0.0591796	-1.34604	4.86421	8846.02	14746.4	11476.2	2690.99	7041.88	4808.75	13.1108	13.8481	13.4864	11.3939	12.7817	12.2314				response to chemical;response to inorganic substance;response to selenium ion;response to stimulus	antioxidant activity	cellular anatomical entity;cytoplasm		1	1.22783	-1.34604	-2.9507	P63302	P63302	SELW_HUMAN	SELENOW	SELENOW	Selenoprotein W	8846.02	14746.4	11476.2	3		7041.88	4808.75	2	SELENOW
P82930	P82930	RT34_HUMAN	MRPS34	MRPS34	Small ribosomal subunit protein mS34	1.21228	0.0593301	0.279252	0.622053	60466.4	56702.3	49871.2	72526.2	61895.5	68076.9	15.8838	15.7911	15.6059	16.1462	15.9175	16.0549				amide biosynthetic process;amide metabolic process;biosynthetic process;cellular biosynthetic process;cellular metabolic process;cellular nitrogen compound biosynthetic process;cellular nitrogen compound metabolic process;cellular process;macromolecule biosynthetic process;macromolecule metabolic process;metabolic process;mitochondrial translation;nitrogen compound metabolic process;organic subst…	structural constituent of ribosome;structural molecule activity	cellular anatomical entity;intracellular membrane-bounded organelle;intracellular organelle;membrane;membrane-bounded organelle;mitochondrial inner membrane;mitochondrial membrane;mitochondrial protein-containing complex;mitochondrial small ribosomal subunit;mitochondrion;organellar small ribosomal subunit;organelle;organelle inner membrane;organelle membrane;protein-containing complex;ribonucleo…		0	1.22672	0.279252	2.65165	P82930	P82930	RT34_HUMAN	MRPS34	MRPS34	Small ribosomal subunit protein mS34	60466.4	56702.3	49871.2	3	72526.2	61895.5	68076.9	3	MRPS34
Q14376	Q14376	GALE_HUMAN	GALE	GALE	UDP-glucose 4-epimerase	0.828299	0.0593337	-0.269377	1.22987	77194.7	85989.1	93747.8	66447	70477.1	75892.2	16.2362	16.3919	16.5165	16.0199	16.1049	16.2117				carbohydrate catabolic process;carbohydrate metabolic process;catabolic process;galactose catabolic process;galactose catabolic process via UDP-galactose;galactose metabolic process;hexose catabolic process;hexose metabolic process;metabolic process;monosaccharide catabolic process;monosaccharide metabolic process;organic substance catabolic process;organic substance metabolic process;primary met…	binding;catalytic activity;identical protein binding;isomerase activity;protein binding;protein dimerization activity;protein homodimerization activity;racemase and epimerase activity;racemase and epimerase activity, acting on carbohydrates and derivatives;UDP-glucose 4-epimerase activity;UDP-N-acetylglucosamine 4-epimerase activity	cellular anatomical entity;cytosol	Amino sugar and nucleotide sugar metabolism;Galactose metabolism	0	1.2267	-0.269377	-2.74212	Q14376	Q14376	GALE_HUMAN	GALE	GALE	UDP-glucose 4-epimerase	77194.7	85989.1	93747.7	3	66447	70477.1	75892.2	3	GALE
Q6GQQ9;Q6GQQ9-2	Q6GQQ9	OTU7B_HUMAN	OTUD7B	OTUD7B	OTU domain-containing protein 7B	1.36791	0.0593654	0.459016	1.22885	4070.63	5061.46	5641.86	6322.41	7620.4	6266.6	11.991	12.3053	12.462	12.6263	12.8957	12.6135				adaptive immune response;anatomical structure development;biological regulation;chordate embryonic development;developmental process;embryo development;embryo development ending in birth or egg hatching;immune response;immune system process;in utero embryonic development;macromolecule metabolic process;macromolecule modification;metabolic process;mucosal immune response;multicellular organism dev…	binding;catalytic activity;catalytic activity, acting on a protein;cation binding;cysteine-type deubiquitinase activity;cysteine-type peptidase activity;deubiquitinase activity;DNA binding;hydrolase activity;ion binding;K48-linked deubiquitinase activity;K63-linked polyubiquitin modification-dependent protein binding;metal ion binding;modification-dependent protein binding;nucleic acid binding;or…	cellular anatomical entity;cytoplasm;cytosol;intracellular membrane-bounded organelle;intracellular organelle;membrane-bounded organelle;nucleus;organelle		0	1.22647	0.459016	2.76117	Q6GQQ9;Q6GQQ9-2	Q6GQQ9	OTU7B_HUMAN	OTUD7B	OTUD7B	OTU domain-containing protein 7B	4070.63	5061.46	5641.86	3	6322.41	7620.4	6266.6	3	OTUD7B
Q6IA86-5;Q6IA86;Q6IA86-2;Q6IA86-3;Q6IA86-6	Q6IA86-5	ELP2_HUMAN	ELP2	ELP2	Elongator complex protein 2	0.880373	0.0599479	-0.185374	0.946312	28683.4	27112.8	26970.2	22465.2	25419.9	24980.2	14.8079	14.7267	14.7191	14.4554	14.6337	14.6085				aromatic compound biosynthetic process;biological regulation;biosynthetic process;cellular aromatic compound metabolic process;cellular biosynthetic process;cellular metabolic process;cellular nitrogen compound biosynthetic process;cellular nitrogen compound metabolic process;cellular process;DNA-templated transcription elongation;heterocycle biosynthetic process;heterocycle metabolic process;mac…	binding;enzyme binding;kinase binding;protein binding;protein kinase binding	catalytic complex;cellular anatomical entity;cytoplasm;cytosol;elongator holoenzyme complex;intracellular protein-containing complex;nuclear protein-containing complex;nucleoplasm;protein-containing complex;transcription elongation factor complex		0	1.22223	-0.185374	-2.96408	Q6IA86-5;Q6IA86;Q6IA86-2;Q6IA86-3;Q6IA86-6	Q6IA86-5	ELP2_HUMAN	ELP2	ELP2	Elongator complex protein 2	28683.4	27112.8	26970.2	3	22465.2	25419.9	24980.2	3	ELP2
Q9BU61	Q9BU61	NDUF3_HUMAN	NDUFAF3	NDUFAF3	NADH dehydrogenase [ubiquinone] 1 alpha subcomplex assembly factor 3	1.21179	0.0600509	0.27361	0.603008	21882.9	22651	22392.5	28599.4	28136.6	24364.7	14.4175	14.4673	14.4507	14.8037	14.7802	14.5725				cellular component assembly;cellular component organization;cellular component organization or biogenesis;cellular process;mitochondrial respiratory chain complex assembly;mitochondrial respiratory chain complex I assembly;NADH dehydrogenase complex assembly;protein-containing complex assembly;protein-containing complex organization		cellular anatomical entity;intracellular membrane-bounded organelle;intracellular organelle;membrane;membrane-bounded organelle;mitochondrial inner membrane;mitochondrial membrane;nucleus;organelle;organelle inner membrane;organelle membrane		0	1.22148	0.27361	3.65303	Q9BU61	Q9BU61	NDUF3_HUMAN	NDUFAF3	NDUFAF3	NADH dehydrogenase [ubiquinone] 1 alpha subcomplex assembly factor 3	21882.9	22651	22392.5	3	28599.4	28136.6	24364.7	3	NDUFAF3
P48681	P48681	NEST_HUMAN	NES	NES	Nestin	1.47465	0.0600697	0.577337	1.62825	3174.75	2279.11	2278.47	3986.4	3600.86	3815.21	11.6324	11.1543	11.1538	11.9609	11.8141	11.8975				anatomical structure development;anatomical structure morphogenesis;animal organ development;apoptotic process;biological regulation;brain development;camera-type eye development;cell cycle G2/M phase transition;cell cycle phase transition;cell cycle process;cell death;cell population proliferation;cell projection morphogenesis;cell projection organization;cellular anatomical entity morphogenesis…	binding;CCR chemokine receptor binding;CCR5 chemokine receptor binding;chemokine receptor binding;cytokine receptor binding;G protein-coupled receptor binding;intermediate filament binding;protein binding;signaling receptor binding	cellular anatomical entity;cytoplasm;cytoskeleton;intermediate filament;intermediate filament cytoskeleton;intracellular non-membrane-bounded organelle;intracellular organelle;non-membrane-bounded organelle;organelle;polymeric cytoskeletal fiber;supramolecular complex;supramolecular fiber;supramolecular polymer		0	1.22134	0.577337	3.49852	P48681	P48681	NEST_HUMAN	NES	NES	Nestin	3174.75	2279.11	2278.47	3	3986.4	3600.86	3815.21	3	NES
P30084	P30084	ECHM_HUMAN	ECHS1	ECHS1	Enoyl-CoA hydratase, mitochondrial	1.10569	0.060259	0.143984	0.165451	281612	266840	273734	320180	288810	300093	18.1033	18.0256	18.0624	18.2885	18.1398	18.195				amino acid catabolic process;amino acid metabolic process;branched-chain amino acid catabolic process;branched-chain amino acid metabolic process;carboxylic acid catabolic process;carboxylic acid metabolic process;catabolic process;cellular catabolic process;cellular lipid catabolic process;cellular lipid metabolic process;cellular metabolic process;cellular process;fatty acid beta-oxidation;fatt…	3-hydroxypropionyl-CoA dehydratase activity;carbon-oxygen lyase activity;catalytic activity;crotonyl-CoA hydratase activity;delta(3)-delta(2)-enoyl-CoA isomerase activity;enoyl-CoA hydratase activity;hydro-lyase activity;intramolecular oxidoreductase activity;intramolecular oxidoreductase activity, transposing C=C bonds;isomerase activity;lyase activity	cellular anatomical entity;intracellular membrane-bounded organelle;intracellular organelle;intracellular organelle lumen;membrane-bounded organelle;membrane-enclosed lumen;mitochondrial matrix;mitochondrion;organelle;organelle lumen	Aminobenzoate degradation;Benzoate degradation;beta-Alanine metabolism;Butanoate metabolism;Caprolactam degradation;Fatty acid elongation in mitochondria;Fatty acid metabolism;Lysine degradation;Propanoate metabolism;Tryptophan metabolism;Valine, leucine and isoleucine degradation	0	1.21998	0.143984	2.94602	P30084	P30084	ECHM_HUMAN	ECHS1	ECHS1	Enoyl-CoA hydratase, mitochondrial	281612	266840	273734	3	320180	288810	300093	3	ECHS1
O43422	O43422	P52K_HUMAN	THAP12	THAP12	52 kDa repressor of the inhibitor of the protein kinase	0.77427	0.0604274	-0.369986	1.56948	21502.4	19713.5	17041.2	13292.5	17029.8	14784.4	14.3922	14.2669	14.0567	13.6983	14.0558	13.8518				biological regulation;cellular process;negative regulation of biological process;negative regulation of cell population proliferation;negative regulation of cellular process;regulation of biological process;regulation of cell population proliferation;regulation of cellular process;signal transduction	binding;cation binding;DNA binding;ion binding;metal ion binding;nucleic acid binding;organic cyclic compound binding;protein binding;protein dimerization activity	cellular anatomical entity;intracellular membrane-bounded organelle;intracellular organelle;membrane-bounded organelle;nucleus;organelle		0	1.21877	-0.369986	-2.597	O43422	O43422	P52K_HUMAN	THAP12	THAP12	52 kDa repressor of the inhibitor of the protein kinase	21502.4	19713.5	17041.2	3	13292.5	17029.8	14784.4	3	THAP12
Q92934	Q92934	BAD_HUMAN	BAD	BAD	Bcl2-associated agonist of cell death	1.24504	0.0605589	0.311393	0.730546	24225.1	25487.5	25249.5	34435.6	30892.9	28002.4	14.5642	14.6375	14.624	15.0716	14.915	14.7733				activation of cysteine-type endopeptidase activity;activation of cysteine-type endopeptidase activity involved in apoptotic process;ADP metabolic process;apoptotic mitochondrial changes;apoptotic process;apoptotic signaling pathway;ATP metabolic process;biological regulation;carbohydrate catabolic process;carbohydrate derivative metabolic process;carbohydrate homeostasis;carbohydrate metabolic pr…	binding;cysteine-type endopeptidase activator activity involved in apoptotic process;cysteine-type endopeptidase regulator activity involved in apoptotic process;enzyme activator activity;enzyme binding;enzyme regulator activity;kinase binding;lipid binding;molecular function activator activity;molecular function regulator activity;peptidase activator activity;peptidase activator activity involve…	BAD-BCL-2 complex;Bcl-2 family protein complex;bounding membrane of organelle;cellular anatomical entity;cytosol;intracellular membrane-bounded organelle;intracellular organelle;membrane;membrane-bounded organelle;mitochondrial membrane;mitochondrial outer membrane;mitochondrion;organelle;organelle membrane;organelle outer membrane;outer membrane;protein-containing complex	Acute myeloid leukemia;Alzheimer's disease;Amyotrophic lateral sclerosis (ALS);Apoptosis;Chronic myeloid leukemia;Colorectal cancer;Endometrial cancer;ErbB signaling pathway;Focal adhesion;Hepatitis C;Insulin signaling pathway;ko05152;Melanoma;Neurotrophin signaling pathway;Non-small cell lung cancer;Pancreatic cancer;Pathways in cancer;Prostate cancer;Toxoplasmosis;VEGF signaling pathway	0	1.21782	0.311393	3.49663	Q92934	Q92934	BAD_HUMAN	BAD	BAD	Bcl2-associated agonist of cell death	24225.1	25487.5	25249.5	3	34435.6	30892.9	28002.4	3	BAD
A0A494C1N0	A0A494C1N0	A0A494C1N0_HUMAN	FKBP2	FKBP2	peptidylprolyl isomerase	1.22747	0.0606747	0.291691	0.664043	798811	819310	803565	892548	1.01e+06	1.07e+06	19.6075	19.6441	19.6161	19.7676	19.9459	20.0292				cellular process;chaperone-mediated protein folding;protein folding	catalytic activity;catalytic activity, acting on a protein;cis-trans isomerase activity;isomerase activity;peptidyl-prolyl cis-trans isomerase activity	cellular anatomical entity;membrane		0	1.21699	0.291691	3.742	A0A494C1N0	A0A494C1N0	A0A494C1N0_HUMAN	FKBP2	FKBP2	peptidylprolyl isomerase	798811	819310	803565	3	892548	1010000	1070000	3	FKBP2
Q14693-7	Q14693-7	LPIN1_HUMAN	LPIN1	LPIN1	Isoform 7 of Phosphatidate phosphatase LPIN1	0.903041	0.0607153	-0.146121	0.813815	9776.34	10128	10848	9531.67	9181.95	9057.01	13.2551	13.3061	13.4051	13.2185	13.1646	13.1448				acylglycerol biosynthetic process;acylglycerol metabolic process;anatomical structure development;animal organ development;animal organ regeneration;biological regulation;biosynthetic process;carboxylic acid catabolic process;carboxylic acid metabolic process;catabolic process;cell cycle process;cellular biosynthetic process;cellular catabolic process;cellular component disassembly;cellular compo…	catalytic activity;hydrolase activity;hydrolase activity, acting on ester bonds;lipid phosphatase activity;phosphatase activity;phosphatidate phosphatase activity;phosphoric ester hydrolase activity;transcription coactivator activity;transcription coregulator activity;transcription regulator activity	bounding membrane of organelle;cellular anatomical entity;cytoplasm;cytosol;endoplasmic reticulum;endoplasmic reticulum membrane;envelope;intracellular membrane-bounded organelle;intracellular organelle;membrane;membrane-bounded organelle;mitochondrial membrane;mitochondrial outer membrane;nuclear envelope;nuclear membrane;nucleoplasm;nucleus;organelle;organelle envelope;organelle membrane;organe…		0	1.2167	-0.146121	-2.96676	Q14693-7	Q14693-7	LPIN1_HUMAN	LPIN1	LPIN1	Isoform 7 of Phosphatidate phosphatase LPIN1	9776.34	10128	10848	3	9531.67	9181.95	9057.01	3	LPIN1
P00505	P00505	AATM_HUMAN	GOT2	GOT2	Aspartate aminotransferase, mitochondrial	1.14659	0.0610012	0.197017	0.344465	188016	191208	170537	221115	194506	214730	17.5205	17.5448	17.3797	17.7544	17.5695	17.7122				2-oxoglutarate metabolic process;4-hydroxyproline catabolic process;4-hydroxyproline metabolic process;alpha-amino acid biosynthetic process;alpha-amino acid catabolic process;alpha-amino acid metabolic process;amide metabolic process;amino acid biosynthetic process;amino acid catabolic process;amino acid metabolic process;aspartate biosynthetic process;aspartate catabolic process;aspartate famil…	anion binding;binding;catalytic activity;heterocyclic compound binding;ion binding;kynurenine aminotransferase activity;kynurenine-oxoglutarate transaminase activity;L-aspartate:2-oxoglutarate aminotransferase activity;nucleic acid binding;organic cyclic compound binding;pyridoxal phosphate binding;RNA binding;small molecule binding;transaminase activity;transferase activity;transferase activity,…	cellular anatomical entity;extracellular exosome;extracellular membrane-bounded organelle;extracellular organelle;extracellular vesicle;intracellular membrane-bounded organelle;intracellular organelle;intracellular organelle lumen;membrane;membrane-bounded organelle;membrane-enclosed lumen;mitochondrial matrix;mitochondrion;organelle;organelle lumen;plasma membrane;vesicle	Alanine, aspartate and glutamate metabolism;Arginine and proline metabolism;Cysteine and methionine metabolism;Fat digestion and absorption;Phenylalanine metabolism;Phenylalanine, tyrosine and tryptophan biosynthesis;Tyrosine metabolism	0	1.21466	0.197017	2.59165	P00505	P00505	AATM_HUMAN	GOT2	GOT2	Aspartate aminotransferase, mitochondrial	188016	191208	170537	3	221115	194506	214730	3	GOT2
Q9BVP2;Q9BVP2-2	Q9BVP2	GNL3_HUMAN	GNL3	GNL3	Guanine nucleotide-binding protein-like 3	1.19893	0.061019	0.261892	0.563454	16758.8	18811.5	15871.8	20253.1	18964.7	22457.8	14.0326	14.1993	13.9542	14.3059	14.211	14.4549				biological regulation;cell division;cellular process;developmental process;maintenance of cell number;multicellular organismal process;positive regulation of biological process;positive regulation of biosynthetic process;positive regulation of cellular biosynthetic process;positive regulation of cellular component organization;positive regulation of cellular metabolic process;positive regulation …	anion binding;binding;carbohydrate derivative binding;GTP binding;guanyl nucleotide binding;guanyl ribonucleotide binding;heterocyclic compound binding;ion binding;mRNA 5'-UTR binding;mRNA binding;nucleic acid binding;nucleoside phosphate binding;nucleotide binding;organic cyclic compound binding;purine nucleotide binding;purine ribonucleoside triphosphate binding;purine ribonucleotide binding;ri…	cellular anatomical entity;chromosome;extracellular space;intracellular membrane-bounded organelle;intracellular non-membrane-bounded organelle;intracellular organelle;membrane;membrane-bounded organelle;midbody;non-membrane-bounded organelle;nuclear body;nucleolus;nucleus;organelle	Ribosome biogenesis in eukaryotes	0	1.21453	0.261892	2.58508	Q9BVP2;Q9BVP2-2	Q9BVP2	GNL3_HUMAN	GNL3	GNL3	Guanine nucleotide-binding protein-like 3	16758.8	18811.5	15871.8	3	20253.1	18964.7	22457.8	3	GNL3
P02649	P02649	APOE_HUMAN	APOE	APOE	Apolipoprotein E	1.37108	0.0614713	0.446409	1.1863	788199	746806	657478	851408	974660	1.18e+06	19.5882	19.5104	19.3266	19.6995	19.8945	20.1704				acylglycerol homeostasis;acylglycerol metabolic process;alcohol catabolic process;alcohol metabolic process;AMPA glutamate receptor clustering;amyloid precursor protein metabolic process;anatomical structure morphogenesis;anterograde trans-synaptic signaling;artery morphogenesis;behavior;biological process involved in interaction with symbiont;biological process involved in interspecies interacti…	amide binding;amyloid-beta binding;antioxidant activity;binding;carbohydrate derivative binding;cation binding;cholesterol transfer activity;cytoskeletal protein binding;enzyme activator activity;enzyme binding;enzyme regulator activity;glycosaminoglycan binding;heparan sulfate proteoglycan binding;heparin binding;identical protein binding;ion binding;lipid binding;lipid transfer activity;lipid t…	blood microparticle;bounding membrane of organelle;cell body;cell junction;cell projection;cellular anatomical entity;chylomicron;chylomicron remnant;clathrin-coated endocytic vesicle membrane;clathrin-coated vesicle membrane;coated vesicle membrane;collagen-containing extracellular matrix;cytoplasm;cytoplasmic vesicle;cytoplasmic vesicle membrane;dendrite;discoidal high-density lipoprotein parti…	Alzheimer's disease	0	1.21133	0.446409	2.842	P02649	P02649	APOE_HUMAN	APOE	APOE	Apolipoprotein E	788199	746806	657478	3	851408	974659	1180000	3	APOE
Q9UJX6;Q9UJX6-2	Q9UJX6	ANC2_HUMAN	ANAPC2	ANAPC2	Anaphase-promoting complex subunit 2	0.83075	0.0617145	-0.270594	1.23398	17851.4	19580	19938.7	17399.9	15995.2	14265.1	14.1237	14.2571	14.2833	14.0868	13.9654	13.8002				anaphase-promoting complex-dependent catabolic process;anatomical structure development;biological regulation;catabolic process;cell cycle phase transition;cell cycle process;cell differentiation;cell division;cellular developmental process;cellular process;developmental process;macromolecule catabolic process;macromolecule metabolic process;macromolecule modification;metabolic process;metaphase/…	binding;enzyme binding;protein binding;ubiquitin protein ligase binding;ubiquitin-like protein ligase binding	anaphase-promoting complex;catalytic complex;cellular anatomical entity;cullin-RING ubiquitin ligase complex;cytosol;intracellular protein-containing complex;nuclear protein-containing complex;nuclear ubiquitin ligase complex;nucleoplasm;protein-containing complex;transferase complex;ubiquitin ligase complex	Cell cycle;Cell cycle - yeast;Meiosis - yeast;Oocyte meiosis;Progesterone-mediated oocyte maturation;Ubiquitin mediated proteolysis	0	1.20961	-0.270594	-2.80031	Q9UJX6;Q9UJX6-2	Q9UJX6	ANC2_HUMAN	ANAPC2	ANAPC2	Anaphase-promoting complex subunit 2	17851.4	19580	19938.7	3	17399.9	15995.2	14265.1	3	ANAPC2
P53816	P53816	PLAT3_HUMAN	PLAAT3	PLAAT3	Phospholipase A and acyltransferase 3	0.529586	0.062543	-0.881691	3.29676	8861.78	5671.44	10642.4	4853.7	4836.16	3642.79	13.1134	12.4695	13.3775	12.2449	12.2396	11.8308				acylglycerol metabolic process;amide metabolic process;biological process involved in interspecies interaction between organisms;biological regulation;biosynthetic process;catabolic process;cell differentiation;cellular component disassembly;cellular component organization;cellular component organization or biogenesis;cellular developmental process;cellular lipid metabolic process;cellular metabo…	1-acyl-2-lysophosphatidylserine acylhydrolase activity;acyltransferase activity;acyltransferase activity, transferring groups other than amino-acyl groups;binding;carboxylic ester hydrolase activity;catalytic activity;hydrolase activity;hydrolase activity, acting on ester bonds;lipase activity;lipid binding;N-acyltransferase activity;phosphatidylserine 1-acylhydrolase activity;phospholipase A1 ac…	bounding membrane of organelle;cellular anatomical entity;cytoplasm;cytosol;endoplasmic reticulum;endoplasmic reticulum membrane;envelope;intracellular membrane-bounded organelle;intracellular organelle;lysosomal membrane;lysosome;lytic vacuole;lytic vacuole membrane;membrane;membrane-bounded organelle;microbody;microbody membrane;mitochondrial membrane;mitochondrion;nuclear envelope;organelle;or…		1	1.20382	-0.881691	-2.91436	P53816	P53816	PLAT3_HUMAN	PLAAT3	PLAAT3	Phospholipase A and acyltransferase 3	8861.78	5671.44	10642.4	3	4853.7	4836.16		2	PLAAT3
P04264;cRAP-P04264	P04264	K2C1_HUMAN;cRAP-K2C1_HUMAN	KRT1;cRAP-KRT1	KRT1	Keratin, type II cytoskeletal 1	0.151709	0.0625538	-2.54345	8.90612	28593.3	170764	117453	27096.4	8728.12	12238.4	14.8034	17.3816	16.8417	14.7258	13.0915	13.5791				activation of immune response;anatomical structure development;anatomical structure homeostasis;biological process involved in interspecies interaction between organisms;biological regulation;cellular component assembly;cellular component organization;cellular component organization or biogenesis;cellular process;complement activation;complement activation, lectin pathway;cytoskeleton organizatio…	binding;carbohydrate binding;molecular transducer activity;protein binding;protein dimerization activity;protein heterodimerization activity;signaling receptor activity;structural constituent of skin epidermis;structural molecule activity	blood microparticle;cellular anatomical entity;collagen-containing extracellular matrix;cornified envelope;cytoplasm;cytoskeleton;cytosol;external encapsulating structure;extracellular exosome;extracellular matrix;extracellular membrane-bounded organelle;extracellular organelle;extracellular region;extracellular space;extracellular vesicle;ficolin-1-rich granule lumen;intermediate filament;intrac…		0	1.20375	-2.54345	-2.75718	P04264;cRAP-P04264	P04264	K2C1_HUMAN;cRAP-K2C1_HUMAN	KRT1;cRAP-KRT1	KRT1	Keratin, type II cytoskeletal 1	28593.3	170764	117453	3	27096.4	8728.12	12238.4	3	KRT1
Q9NRA0;Q9NRA0-2;Q9NRA0-4;Q9NRA0-5	Q9NRA0	SPHK2_HUMAN	SPHK2	SPHK2	Sphingosine kinase 2	1.40778	0.0626697	0.497006	1.35709	4266.72	4900.28	3462.86	6055.11	4991.43	6733.56	12.0589	12.2586	11.7577	12.5639	12.2852	12.7172				alcohol biosynthetic process;alcohol metabolic process;anatomical structure development;animal organ development;biological regulation;biosynthetic process;blood vessel development;brain development;cell population proliferation;cellular biosynthetic process;cellular component organization;cellular component organization or biogenesis;cellular lipid metabolic process;cellular metabolic process;ce…	adenyl nucleotide binding;adenyl ribonucleotide binding;anion binding;ATP binding;binding;bioactive lipid receptor activity;carbohydrate derivative binding;catalytic activity;D-erythro-sphingosine kinase activity;enzyme binding;G protein-coupled receptor activity;GTPase binding;heterocyclic compound binding;histone binding;ion binding;kinase activity;lipid kinase activity;molecular transducer act…	bounding membrane of organelle;cellular anatomical entity;cytoplasm;cytosol;endoplasmic reticulum;intracellular membrane-bounded organelle;intracellular organelle;lysosomal membrane;lytic vacuole membrane;membrane;membrane-bounded organelle;mitochondrial inner membrane;mitochondrial membrane;mitochondrion;nucleoplasm;nucleosome;nucleus;organelle;organelle inner membrane;organelle membrane;protein…	Calcium signaling pathway;Fc gamma R-mediated phagocytosis;ko05152;Sphingolipid metabolism;VEGF signaling pathway	0	1.20294	0.497006	2.57764	Q9NRA0;Q9NRA0-2;Q9NRA0-4;Q9NRA0-5	Q9NRA0	SPHK2_HUMAN	SPHK2	SPHK2	Sphingosine kinase 2	4266.72	4900.28	3462.86	3	6055.11	4991.43	6733.56	3	SPHK2
Q7KZN9;Q7KZN9-2	Q7KZN9	COX15_HUMAN	COX15	COX15	Heme A synthase COX15	1.26181	0.0627929	0.335553	0.812099	10232.7	12785.7	11363.9	15987.1	14586.5	12810.2	13.3209	13.6422	13.4722	13.9646	13.8323	13.645				aerobic electron transport chain;aerobic respiration;aromatic compound biosynthetic process;biosynthetic process;cellular aromatic compound metabolic process;cellular biosynthetic process;cellular component assembly;cellular component organization;cellular component organization or biogenesis;cellular metabolic process;cellular nitrogen compound biosynthetic process;cellular nitrogen compound met…	active monoatomic ion transmembrane transporter activity;active transmembrane transporter activity;binding;catalytic activity;cytochrome-c oxidase activity;electron transfer activity;heme binding;inorganic cation transmembrane transporter activity;inorganic molecular entity transmembrane transporter activity;molecular adaptor activity;monoatomic cation transmembrane transporter activity;monoatomi…	catalytic complex;cellular anatomical entity;cytochrome complex;intracellular membrane-bounded organelle;intracellular organelle;membrane;membrane-bounded organelle;mitochondrial inner membrane;mitochondrial membrane;mitochondrial respirasome;mitochondrion;nucleoplasm;organelle;organelle inner membrane;organelle membrane;protein-containing complex;respirasome	Oxidative phosphorylation;Porphyrin and chlorophyll metabolism;Two-component system	0	1.20209	0.335553	2.55767	Q7KZN9;Q7KZN9-2	Q7KZN9	COX15_HUMAN	COX15	COX15	Heme A synthase COX15	10232.7	12785.7	11363.9	3	15987.1	14586.5	12810.2	3	COX15
Q7Z434	Q7Z434	MAVS_HUMAN	MAVS	MAVS	Mitochondrial antiviral-signaling protein	1.11801	0.0629063	0.161798	0.225581	169684	179015	191141	194331	198499	210718	17.3725	17.4497	17.5443	17.5682	17.5988	17.685				activation of immune response;activation of innate immune response;antiviral innate immune response;biological process involved in interspecies interaction between organisms;biological regulation;cell surface receptor signaling pathway;cellular localization;cellular macromolecule localization;cellular process;cellular response to chemical stimulus;cellular response to dsRNA;cellular response to e…	binding;CARD domain binding;enzyme binding;identical protein binding;kinase binding;molecular adaptor activity;molecular condensate scaffold activity;protein binding;protein domain specific binding;protein kinase binding;protein-macromolecule adaptor activity;RIG-I binding;signaling adaptor activity;signaling receptor binding	bounding membrane of organelle;catalytic complex;cellular anatomical entity;intracellular membrane-bounded organelle;intracellular organelle;intracellular protein-containing complex;membrane;membrane-bounded organelle;microbody;microbody membrane;mitochondrial membrane;mitochondrial outer membrane;mitochondrion;organelle;organelle membrane;organelle outer membrane;outer membrane;peroxisomal membr…	Cytosolic DNA-sensing pathway;Hepatitis C;Measles;RIG-I-like receptor signaling pathway	0	1.20131	0.161798	2.66351	Q7Z434	Q7Z434	MAVS_HUMAN	MAVS	MAVS	Mitochondrial antiviral-signaling protein	169684	179015	191141	3	194331	198499	210718	3	MAVS
O75177	O75177	CREST_HUMAN	SS18L1	SS18L1	Calcium-responsive transactivator	0.778115	0.0629502	-0.361998	1.54251	6739.63	6644.45	8217.6	5806.36	4863.12	6139.1	12.7185	12.6979	13.0045	12.5034	12.2477	12.5838				anatomical structure development;biological regulation;cell projection organization;cellular component organization;cellular component organization or biogenesis;cellular process;chromatin organization;dendrite development;developmental process;neuron projection development;plasma membrane bounded cell projection organization;positive regulation of biological process;positive regulation of biosyn…	transcription coactivator activity;transcription coregulator activity;transcription regulator activity	ATPase complex;catalytic complex;cellular anatomical entity;cytosol;intracellular membrane-bounded organelle;intracellular non-membrane-bounded organelle;intracellular organelle;kinetochore;membrane-bounded organelle;nBAF complex;non-membrane-bounded organelle;nuclear protein-containing complex;nucleoplasm;nucleus;organelle;protein-containing complex;supramolecular complex;SWI/SNF superfamily-typ…		0	1.201	-0.361998	-2.55583	O75177	O75177	CREST_HUMAN	SS18L1	SS18L1	Calcium-responsive transactivator	6739.63	6644.45	8217.6	3	5806.36	4863.12	6139.1	3	SS18L1
Q8NFY9	Q8NFY9	KBTB8_HUMAN	KBTBD8	KBTBD8	Kelch repeat and BTB domain-containing protein 8	0.763452	0.0634174	-0.381739	1.60915	5781.82	6428.26	7595.15	5268.78	5124.79	4726.76	12.4973	12.6502	12.8909	12.3633	12.3233	12.2066				anatomical structure development;anatomical structure formation involved in morphogenesis;biological regulation;cell development;cell differentiation;cellular developmental process;cellular process;developmental process;epithelial to mesenchymal transition;macromolecule metabolic process;macromolecule modification;mesenchymal cell differentiation;metabolic process;neural crest cell development;ne…		catalytic complex;cellular anatomical entity;Cul3-RING ubiquitin ligase complex;cullin-RING ubiquitin ligase complex;cytosol;Golgi apparatus;intracellular membrane-bounded organelle;intracellular non-membrane-bounded organelle;intracellular organelle;intracellular protein-containing complex;membrane-bounded organelle;non-membrane-bounded organelle;organelle;protein-containing complex;spindle;tran…		0	1.19779	-0.381739	-3.08332	Q8NFY9	Q8NFY9	KBTB8_HUMAN	KBTBD8	KBTBD8	Kelch repeat and BTB domain-containing protein 8	5781.82	6428.26	7595.15	3	5268.78	5124.79	4726.76	3	KBTBD8
Q7Z7L1	Q7Z7L1	SLN11_HUMAN	SLFN11	SLFN11	Schlafen family member 11	1.07718	0.0635934	0.107763	0.0431846	54243.4	58287.5	58004.4	62433.6	61619.5	59644	15.7272	15.8309	15.8239	15.93	15.9111	15.8641				biological process involved in interspecies interaction between organisms;biological regulation;cellular aromatic compound metabolic process;cellular component organization;cellular component organization or biogenesis;cellular metabolic process;cellular nitrogen compound metabolic process;cellular process;cellular response to stimulus;cellular response to stress;chromatin organization;chromatin …	adenyl nucleotide binding;adenyl ribonucleotide binding;anion binding;ATP binding;ATP hydrolysis activity;ATP-dependent activity;binding;carbohydrate derivative binding;catalytic activity;catalytic activity, acting on a nucleic acid;helicase activity;heterocyclic compound binding;hydrolase activity;hydrolase activity, acting on acid anhydrides;hydrolase activity, acting on acid anhydrides, in pho…	cellular anatomical entity;cytosol;intracellular membrane-bounded organelle;intracellular organelle;membrane-bounded organelle;nucleoplasm;nucleus;organelle;site of DNA damage		0	1.19659	0.107763	2.7782	Q7Z7L1	Q7Z7L1	SLN11_HUMAN	SLFN11	SLFN11	Schlafen family member 11	54243.4	58287.5	58004.4	3	62433.6	61619.5	59644	3	SLFN11
[truncated: 7,457 more rows]

## Sheet: S3
Protein_Group	Protein_Group_1	Protein_Names	Genes	Genes_1	First_Protein_Description	Avg Ratio iMGL EtOH v C	Welch's T-test iMGL EtOH v C	T-test diff iMGL EtOH v C	Z-score iMGL EtOH v C	iMGL Cnrtl_1	iMGL Cnrtl_2	iMGL Cnrtl_3	iMGL EtOH_1	iMGL EtOH_2	iMGL EtOH_3	Log2 iMGL Cnrtl_1	Log2 iMGL Cnrtl_2	Log2 iMGL Cnrtl_3	Log2 iMGL EtOH_1	Log2 iMGL EtOH_2	Log2 iMGL EtOH_3	Welch's T-test Significant EtOH_Cnrtl	Welch's T-test significant	Cluster	GOBP name	GOMF name	GOCC name	KEGG name	#Imputations	-Log Welch's T-test p-value EtOH_Cnrtl	Welch's T-test Difference EtOH_Cnrtl	Welch's T-test Test statistic EtOH_Cnrtl	Protein_Group	Protein_Group_1	Protein_Names	Genes	Genes_1	First_Protein_Description	Original iMGL Cnrtl_1	Original iMGL Cnrtl_2	Original iMGL Cnrtl_3	rep	Original iMGL EtOH_1	Original iMGL EtOH_2	Original iMGL EtOH_3	rep	Genes_1_copyEnd
[truncated: 85 more rows]

## Sheet: S4
Protein_Group	Protein_Group_1	Protein_Names	Genes	Genes_1	First_Protein_Description	Avg Ratio 24h_iMGL LPS v C	Avg Ratio 24h_iMGL TNFa v C	Avg Ratio 24h_iMGL LPS v TNFa	24h_iMGL_Cnrtl_1	24h_iMGL_Cnrtl_2	24h_iMGL_Cnrtl_3	24h_iMGL_LPS_1	24h_iMGL_LPS_2	24h_iMGL_LPS_3	24h_iMGL_TNFa_1	24h_iMGL_TNFa_2	24h_iMGL_TNFa_3	Log2_24h_iMGL_Cnrtl_1	Log2_24h_iMGL_Cnrtl_2	Log2_24h_iMGL_Cnrtl_3	Log2_24h_iMGL_LPS_1	Log2_24h_iMGL_LPS_2	Log2_24h_iMGL_LPS_3	Log2_24h_iMGL_TNFa_1	Log2_24h_iMGL_TNFa_2	Log2_24h_iMGL_TNFa_3	ANOVA Significant	Significant pairs	Cluster	GOBP name	GOMF name	GOCC name	KEGG name	#Imputations	"-Log ANOVA p value"	Protein_Group	Protein_Group_1	Protein_Names	Genes	Genes_1	First_Protein_Description	Original_24h_iMGL_Cnrtl_1	Original_24h_iMGL_Cnrtl_2	Original_24h_iMGL_Cnrtl_3	rep	Original_24h_iMGL_LPS_1	Original_24h_iMGL_LPS_2	Original_24h_iMGL_LPS_3	rep
[truncated: 8,492 more rows]
[truncated: 6 more columns]

[truncated: 3 more sheets: S5, S6, S7]
